# Supplementary material for: Microgenomic Analysis in Skeletal Muscle: Expression Signatures of Individual Fast and Slow Myofibers
Source: PLoS One. 2011 Feb 22;6(2):e16807. doi: 10.1371/journal.pone.0016807 (PMC3043066; doi:10.1371/journal.pone.0016807)
Supplement: Dataset S2 — Additional information for data presented in Table 1. (XLS) [file pone.0016807.s004.xls]

## Sheet: Dataset 2 - Info
Chemello F. et al - Single cell analysis in skeletal muscle: expression profiles of individual fast and slow fibers
Dataset S2
Content:	Additional information about data presented in Table 1
Sheet Most positives	GO of most significant genes overexpressed in myofibres
Sheet All positives	Functional classification of genes overexpressed in myofibres
Sheet Most negatives	GO of most significant genes overexpressed in whole muscles
Sheet All negatives	Functional classification of genes overexpressed in whole muscles
The number that follows the ± sign is a standard deviation (s.d.)

## Sheet: Most positives
Gene ID	Gene Symbol	Gene Description	Probe ID	MyHC 2B	MyHC 1	Gene Ontology
21871	Atp6v0a2	ATPase, H+ transporting, lysosomal V0 subunit A2	M000368_01	1.407 ± 0.483	1.874 ± 0.43	Shown in Figure 3 A
12391	Cav3	caveolin 3	M001370_01	1.126 ± 0.273	1.393 ± 0.353
12715	Ckm	creatine kinase, muscle	M000803_01	1.16 ± 0.908	1.185 ± 0.661
68598	Dnajc8	DnaJ (Hsp40) homolog, subfamily C, member 8	M009640_01	1.297 ± 0.34	1.512 ± 0.659
13527	Dtna	dystrobrevin alpha	M007048_01	1.059 ± 0.464	1.01 ± 0.641
16341	Eif3e	eukaryotic translation initiation factor 3, subunit E	M006924_01	0.766 ± 0.209	1.282 ± 0.714
14084	Faf1	Fas-associated factor 1	M001299_01	1.035 ± 0.394	1.198 ± 0.556
71375	Foxn3	forkhead box N3	M011026_01	1.198 ± 0.689	1.553 ± 0.721
56637	Gsk3b	glycogen synthase kinase 3 beta	M004648_01	1 ± 0.44	1.617 ± 0.497
15108	Hsd17b10	hydroxysteroid (17-beta) dehydrogenase 10	M002288_01	0.938 ± 0.287	1.065 ± 0.365
71912	Jsrp1	junctional sarcoplasmic reticulum protein 1	M010106_01	1.111 ± 0.571	1.153 ± 0.494
68652	Map3k7ip2	MAPKKK 7 interacting protein 2	M013422_01	1.61 ± 0.434	1.4 ± 0.304
68342	Ndufb10	NADH dehydrogenase (ubiquinone) 1 beta subcomplex, 10	M007247_01	0.831 ± 0.557	1.663 ± 0.347
59125	Nek7	NIMA (never in mitosis gene a)-related expressed kinase 7	M006442_01	1.111 ± 0.355	0.924 ± 0.329
18021	Nfatc3	NFAT cytoplasmic, calcineurin-dependent 3	M001076_01	1.426 ± 0.642	0.766 ± 0.639
67399	Pdlim7	PDZ and LIM domain 7	M007049_01	1.452 ± 0.556	0.932 ± 0.461
56012	Pgam2	phosphoglycerate mutase 2	M002724_01	1.163 ± 0.486	0.886 ± 0.549
68943	Pink1	PTEN induced putative kinase 1	M007477_01	0.901 ± 0.427	1.18 ± 0.497
20021	Polr2c	polymerase (RNA) II (DNA directed) polypeptide C	M000753_01	1.379 ± 0.558	0.919 ± 0.501
19185	Psmd4	proteasome 26S subunit, non-ATPase, 4	M000774_01	0.903 ± 0.28	1.221 ± 0.589
14000	Rnasen	ribonuclease III, nuclear	M009134_01	1.146 ± 0.691	1.06 ± 0.612
331532	Tceal5	transcription elongation factor A (SII)-like 5	M009884_01	0.887 ± 0.316	1.113 ± 0.382
50874	Tmod4	tropomodulin 4	M005591_01	1.183 ± 0.473	1.519 ± 0.41
58522	Trim54	tripartite motif-containing 54	M006424_01	1.161 ± 0.374	1.126 ± 0.214
56551	Txn2	thioredoxin 2	M001261_01	1.29 ± 0.817	1.038 ± 0.338
Most significant genes overexpressed in myofibres
Gene ID	Gene Symbol	Gene Description	Probe ID	MyHC 2B	MyHC 1	Gene Ontology
11459	Acta1	actin, alpha 1, skeletal muscle	M005819_01	0.551 ± 0.634	1.42 ± 0.864	contractile fiber part
12391	Cav3	caveolin 3	M001370_01	1.126 ± 0.273	1.393 ± 0.353	contractile fiber part
14359	Fxr1	fragile X mental retardation gene 1, autosomal homolog	M001420_01	0.853 ± 0.451	1.029 ± 0.365	contractile fiber part
26549	Itgb1bp2	integrin beta 1 binding protein 2	M005209_01	0.536 ± 0.226	1.33 ± 0.434	contractile fiber part
16669	Krt19	keratin 19	M000324_01	0.895 ± 0.532	0.617 ± 0.705	contractile fiber part
24131	Ldb3	LIM domain binding 3	M004397_01	0.662 ± 0.644	0.94 ± 0.734	contractile fiber part
68016	Murc	muscle-related coiled-coil protein	M011435_01	0.467 ± 0.344	1.108 ± 0.562	contractile fiber part
19309	Pygm	muscle glycogen phosphorylase	M004109_01	0.629 ± 0.499	0.832 ± 0.646	contractile fiber part
20971	Sdc4	syndecan 4	M001325_01	0.566 ± 0.444	1.395 ± 0.605	contractile fiber part
21925	Tnnc2	troponin C2, fast	M006959_01	1.218 ± 0.647	0.414 ± 0.603	contractile fiber part
66469	2810405K02Rik	RIKEN cDNA 2810405K02 gene	M009950_01	1.409 ± 0.291	0.514 ± 0.293	cytosol
11652	Akt2	thymoma viral proto-oncogene 2	M002532_01	-0.035 ± 0.777	0.72 ± 1.431	cytosol
14533	Bloc1s1	biogenesis of lysosome-related organelles complex-1, subunit 1	M004468_01	1.048 ± 0.793	0.69 ± 0.713	cytosol
14793	Cdca3	cell division cycle associated 3	M003661_01	1.536 ± 0.673	0.905 ± 1.415	cytosol
12890	Cplx2	complexin 2	M001760_01	1.322 ± 0.602	0.846 ± 1.117	cytosol
14084	Faf1	Fas-associated factor 1	M001299_01	1.035 ± 0.394	1.198 ± 0.556	cytosol
14623	Gjb6	gap junction protein, beta 6	M006624_01	0.928 ± 0.684	0.744 ± 0.713	cytosol
14555	Gpd1	glycerol-3-phosphate dehydrogenase 1 (soluble)	M002690_01	1.512 ± 0.631	0.417 ± 0.595	cytosol
14751	Gpi1	glucose phosphate isomerase 1	M000174_01	1.213 ± 0.518	0.47 ± 0.631	cytosol
56637	Gsk3b	glycogen synthase kinase 3 beta	M004648_01	1 ± 0.44	1.617 ± 0.497	cytosol
14976	H2-Ke2	H2-K region expressed gene 2	M001025_01	0.891 ± 0.816	0.861 ± 0.705	cytosol
16452	Jak2	Janus kinase 2	M000249_01	0.859 ± 0.649	0.741 ± 0.578	cytosol
68652	Map3k7ip2	mitogen-activated protein kinase kinase kinase 7 interacting protein 2	M013422_01	1.61 ± 0.434	1.4 ± 0.304	cytosol
26416	Mapk14	mitogen-activated protein kinase 14	M001599_01	1.31 ± 0.353	0.205 ± 0.458	cytosol
18039	Nefl	neurofilament, light polypeptide	M000674_01	0.892 ± 0.492	0.758 ± 0.74	cytosol
13026	Pcyt1a	phosphate cytidylyltransferase 1, choline, alpha isoform	M001357_01	1.094 ± 1.035	0.661 ± 0.766	cytosol
18578	Pde4b	phosphodiesterase 4B, cAMP specific	M003364_01	-0.033 ± 1.108	0.872 ± 0.854	cytosol
56012	Pgam2	phosphoglycerate mutase 2	M002724_01	1.163 ± 0.486	0.886 ± 0.549	cytosol
66522	Pgpep1	pyroglutamyl-peptidase I	M011749_01	0.538 ± 0.269	0.614 ± 0.214	cytosol
19167	Psma3	proteasome (prosome, macropain) subunit, alpha type 3	M000320_01	0.902 ± 0.5	0.511 ± 0.459	cytosol
26442	Psma5	proteasome (prosome, macropain) subunit, alpha type 5	M000781_01	0.9 ± 0.508	0.903 ± 0.33	cytosol
26444	Psma7	proteasome (prosome, macropain) subunit, alpha type 7	M003593_01	0.795 ± 0.556	1.047 ± 0.39	cytosol
19170	Psmb1	proteasome (prosome, macropain) subunit, beta type 1	M004691_01	0.326 ± 0.394	1 ± 0.571	cytosol
19175	Psmb6	proteasome (prosome, macropain) subunit, beta type 6	M000026_01	0.777 ± 0.621	0.735 ± 0.411	cytosol
19179	Psmc1	protease (prosome, macropain) 26S subunit, ATPase 1	M000760_01	1.001 ± 0.389	0.729 ± 0.359	cytosol
19182	Psmc3	proteasome (prosome, macropain) 26S subunit, ATPase 3	M003535_01	0.493 ± 0.556	0.705 ± 0.457	cytosol
66997	Psmd12	proteasome (prosome, macropain) 26S subunit, non-ATPase, 12	M007685_01	0.918 ± 0.656	0.971 ± 0.415	cytosol
19185	Psmd4	proteasome (prosome, macropain) 26S subunit, non-ATPase, 4	M000774_01	0.903 ± 0.28	1.221 ± 0.589	cytosol
20103	Rps5	ribosomal protein S5	M002104_01	0.645 ± 0.351	1.184 ± 0.383	cytosol
20422	Shfm1	split hand/foot malformation (ectrodactyly) type 1	M000841_01	0.542 ± 0.614	1.043 ± 0.272	cytosol
21454	Tcp1	t-complex protein 1	M000761_01	0.65 ± 0.475	0.867 ± 0.41	cytosol
74019	Traf3ip1	TRAF3 interacting protein 1	M009234_01	1 ± 0.353	0.867 ± 0.411	cytosol
22241	Ulk1	Unc-51 like kinase 1 (C. elegans)	M004632_01	0.487 ± 0.532	0.853 ± 0.489	cytosol
66914	Vps28	vacuolar protein sorting 28 (yeast)	M009020_01	0.569 ± 0.33	0.667 ± 0.366	cytosol
20402	Zfp106	zinc finger protein 106	M002433_01	1.039 ± 0.416	0.953 ± 0.618	cytosol
69029	1500032L24Rik	RIKEN cDNA 1500032L24 gene	M013176_01	0.832 ± 0.33	0.641 ± 0.423	mitochondrion
69186	1810027O10Rik	RIKEN cDNA 1810027O10 gene	M013244_01	0.569 ± 0.414	0.849 ± 0.348	mitochondrion
69487	2310003L22Rik	RIKEN cDNA 2310003L22 gene	M009278_01	1.029 ± 0.321	1.33 ± 0.405	mitochondrion
76916	4930455C21Rik	RIKEN cDNA 4930455C21 gene	M011402_01	0.968 ± 0.465	0.797 ± 0.579	mitochondrion
229211	Acad9	acyl-Coenzyme A dehydrogenase family, member 9	M008628_01	1.053 ± 0.436	0.54 ± 0.294	mitochondrion
11636	Ak1	adenylate kinase 1	M004318_01	0.844 ± 0.357	0.544 ± 0.586	mitochondrion
11947	Atp5b	ATP synthase, H+ transporting mitochondrial F1 complex, beta subunit	M003204_01	0.595 ± 0.327	1.159 ± 0.479	mitochondrion
67942	Atp5g2	ATP synthase, H+ transporting, mitochondrial F0 complex, subunit c (subunit 9), isoform 2	M007286_01	0.517 ± 0.326	0.839 ± 0.268	mitochondrion
12050	Bcl2l2	BCL2-like 2	M002281_01	0.866 ± 0.582	0.586 ± 0.406	mitochondrion
12215	Bsg	basigin	M000223_01	1.237 ± 0.598	0.777 ± 0.282	mitochondrion
12343	Capza2	capping protein (actin filament) muscle Z-line, alpha 2	M001259_01	1.213 ± 0.612	0.481 ± 0.616	mitochondrion
12372	Casq1	calsequestrin 1	M002814_01	1.388 ± 0.708	0.455 ± 0.719	mitochondrion
52469	Ccdc56	coiled-coil domain containing 56	M006872_01	0.612 ± 0.271	0.758 ± 0.415	mitochondrion
12856	Cox17	cytochrome c oxidase, subunit XVII assembly protein homolog (yeast)	M008358_01	0.78 ± 0.239	0.839 ± 0.473	mitochondrion
12862	Cox6a2	cytochrome c oxidase, subunit VI a, polypeptide 2	M005145_01	0.83 ± 0.281	1.108 ± 0.369	mitochondrion
12865	Cox7a1	cytochrome c oxidase, subunit VIIa 1	M002857_01	0.641 ± 0.644	1.007 ± 0.518	mitochondrion
12866	Cox7a2	cytochrome c oxidase, subunit VIIa 2	M000740_01	0.73 ± 0.341	0.915 ± 0.464	mitochondrion
12869	Cox8b	cytochrome c oxidase, subunit VIIIb	M001334_01	0.456 ± 0.35	0.954 ± 0.45	mitochondrion
12892	Cpox	coproporphyrinogen oxidase	M004738_01	0.792 ± 0.466	0.41 ± 0.474	mitochondrion
12908	Crat	carnitine acetyltransferase	M003394_01	1.068 ± 0.371	0.818 ± 0.396	mitochondrion
13063	Cycs	cytochrome c, somatic	M009510_01	0.72 ± 0.402	0.741 ± 0.585	mitochondrion
26940	Ecsit	ECSIT homolog (Drosophila)	M004407_01	0.984 ± 0.301	0.617 ± 0.431	mitochondrion
270076	Gcdh	glutaryl-Coenzyme A dehydrogenase	M000844_01	0.808 ± 0.284	0.781 ± 0.419	mitochondrion
14719	Got2	glutamate oxaloacetate transaminase 2, mitochondrial	M003295_01	0.397 ± 0.307	0.798 ± 0.407	mitochondrion
70359	Gtpbp3	GTP binding protein 3	M011552_01	0.637 ± 0.549	0.833 ± 0.371	mitochondrion
15108	Hsd17b10	hydroxysteroid (17-beta) dehydrogenase 10	M002288_01	0.938 ± 0.287	1.065 ± 0.365	mitochondrion
15516	Hsp90ab1	heat shock protein 90 alpha (cytosolic), class B member 1	M006656_01	1.017 ± 0.491	1.16 ± 0.55	mitochondrion
15929	Idh3g	isocitrate dehydrogenase 3 (NAD+), gamma	M003039_01	0.781 ± 0.309	0.559 ± 0.493	mitochondrion
66541	Immp1l	IMP1 inner mitochondrial membrane peptidase-like (S. cerevisiae)	M011588_01	0.719 ± 0.407	0.865 ± 0.42	mitochondrion
64697	Keg1	kidney expressed gene 1	M006751_01	0.741 ± 0.541	0.498 ± 0.63	mitochondrion
100048676	LOC100048676	similar to 3-methyl-2-oxobutanoate dehydrogenase	M002810_01	0.857 ± 0.309	0.855 ± 0.324	mitochondrion
29857	Mapk12	mitogen-activated protein kinase 12	M004806_01	0.412 ± 0.5	1.142 ± 0.451	mitochondrion
68537	Mrpl13	mitochondrial ribosomal protein L13	M007274_01	0.971 ± 0.337	0.821 ± 0.399	mitochondrion
67681	Mrpl18	mitochondrial ribosomal protein L18	M007641_01	0.823 ± 0.307	1.344 ± 0.448	mitochondrion
94067	Mrpl43	mitochondrial ribosomal protein L43	M010023_01	0.463 ± 0.512	1.04 ± 0.463	mitochondrion
64655	Mrps22	mitochondrial ribosomal protein S22	M007453_01	0.678 ± 0.241	0.614 ± 0.384	mitochondrion
17991	Ndufa2	NADH dehydrogenase (ubiquinone) 1 alpha subcomplex, 2	M004419_01	0.78 ± 0.571	0.698 ± 0.561	mitochondrion
66416	Ndufa7	NADH dehydrogenase (ubiquinone) 1 alpha subcomplex, 7 (B14.5a)	M004365_01	1.153 ± 0.558	0.515 ± 0.545	mitochondrion
68342	Ndufb10	NADH dehydrogenase (ubiquinone) 1 beta subcomplex, 10	M007247_01	0.831 ± 0.557	1.663 ± 0.347	mitochondrion
104130	Ndufb11	NADH dehydrogenase (ubiquinone) 1 beta subcomplex, 11	M004459_01	0.646 ± 0.367	0.834 ± 0.438	mitochondrion
433904	Ociad2	OCIA domain containing 2	M009690_01	1.496 ± 0.62	0.293 ± 0.411	mitochondrion
57320	Park7	Parkinson disease (autosomal recessive, early onset) 7	M000853_01	0.331 ± 0.531	1.022 ± 0.312	mitochondrion
64058	Perp	PERP, TP53 apoptosis effector	M004174_01	-0.029 ± 0.766	0.533 ± 0.739	mitochondrion
18673	Phb	prohibitin	M000798_01	0.523 ± 0.341	0.86 ± 0.629	mitochondrion
68943	Pink1	PTEN induced putative kinase 1	M007477_01	0.901 ± 0.427	1.18 ± 0.497	mitochondrion
18746	Pkm2	pyruvate kinase, muscle	M000919_01	1.442 ± 0.62	0.326 ± 0.458	mitochondrion
66865	Pmpca	peptidase (mitochondrial processing) alpha	M013274_01	0.755 ± 0.392	0.953 ± 0.263	mitochondrion
23996	Psmc4	proteasome (prosome, macropain) 26S subunit, ATPase, 4	M004375_01	1.035 ± 0.619	0.746 ± 0.286	mitochondrion
20280	Scp2	sterol carrier protein 2, liver	M000631_01	0.626 ± 0.348	0.811 ± 0.636	mitochondrion
20280	Scp2	sterol carrier protein 2, liver	M005717_01	0.51 ± 0.285	0.692 ± 0.346	mitochondrion
20655	Sod1	superoxide dismutase 1, soluble	M002099_01	0.601 ± 0.391	0.927 ± 0.451	mitochondrion
66592	Stoml2	stomatin (Epb7.2)-like 2	M008973_01	0.329 ± 0.341	1.042 ± 0.325	mitochondrion
20917	Suclg2	succinate-Coenzyme A ligase, GDP-forming, beta subunit	M004673_01	0.326 ± 0.526	1.516 ± 0.614	mitochondrion
71807	Tars2	threonyl-tRNA synthetase 2, mitochondrial (putative)	M007271_01	0.542 ± 0.536	0.829 ± 0.5	mitochondrion
30055	Timm13	translocase of inner mitochondrial membrane 13 homolog (yeast)	M003656_01	0.799 ± 0.476	0.801 ± 0.367	mitochondrion
21855	Timm17b	translocase of inner mitochondrial membrane 17b	M004057_01	1.025 ± 0.614	0.736 ± 0.426	mitochondrion
56551	Txn2	thioredoxin 2	M001261_01	1.29 ± 0.817	1.038 ± 0.338	mitochondrion
22273	Uqcrc1	ubiquinol-cytochrome c reductase core protein 1	M006926_01	0.718 ± 0.277	0.991 ± 0.405	mitochondrion
108160	Fam50a	family with sequence similarity 50, member A	M001568_01	0.942 ± 0.546	0.682 ± 0.465	ribosome
100043295	Gm15500	predicted gene 15500	M007097_01	0.866 ± 0.27	1.2 ± 0.376	ribosome
100039316	Gm9843	predicted gene 9843	M001881_01	0.62 ± 0.487	0.771 ± 0.546	ribosome
100047372	mCG_130059	ribosomal protein L22 pseudogene	M013323_01	0.597 ± 0.411	0.88 ± 0.277	ribosome
19896	Rpl10a	ribosomal protein L10A	M002234_01	1.519 ± 0.789	0.786 ± 0.549	ribosome
269261	Rpl12	ribosomal protein L12	M005587_01	0.486 ± 0.298	1.145 ± 0.381	ribosome
19899	Rpl18	ribosomal protein L18	M009962_01	0.834 ± 0.445	1.009 ± 0.392	ribosome
66211	Rpl3l	ribosomal protein L3-like	M010294_01	0.367 ± 0.558	0.902 ± 0.445	ribosome
26961	Rpl8	ribosomal protein L8	M004453_01	0.88 ± 0.506	0.604 ± 0.452	ribosome
16785	Rpsa	ribosomal protein SA	M007079_01	0.338 ± 0.344	1.166 ± 0.397	ribosome
12293	Cacna2d1	calcium channel, voltage-dependent, alpha2/delta subunit 1	M004549_01	0.937 ± 0.525	0.741 ± 0.491	sarcoplasmic reticulum
12295	Cacnb1	calcium channel, voltage-dependent, beta 1 subunit	M009798_01	0.88 ± 0.413	0.355 ± 0.44	sarcoplasmic reticulum
71912	Jsrp1	junctional sarcoplasmic reticulum protein 1	M010106_01	1.111 ± 0.571	1.153 ± 0.494	sarcoplasmic reticulum
57438	March7	membrane-associated ring finger (C3HC4) 7	M003227_01	0.453 ± 0.45	1.069 ± 0.652
66838	0610009L18Rik	RIKEN cDNA 0610009L18 gene	M010381_01	1.007 ± 0.629	0.784 ± 0.254
67388	1110008F13Rik	RIKEN cDNA 1110008F13 gene	M008810_01	0.869 ± 0.26	1.125 ± 0.227
66931	1700010I14Rik	RIKEN cDNA 1700010I14 gene	M010665_01	0.781 ± 0.541	0.711 ± 0.553
74221	1700011F03Rik	RIKEN cDNA 1700011F03 gene	M012366_01	0.809 ± 0.414	0.708 ± 0.687
67851	1700021F05Rik	RIKEN cDNA 1700021F05 gene	M008103_01	0.638 ± 0.531	0.643 ± 0.718
67483	1700028P14Rik	RIKEN cDNA 1700028P14 gene	M010717_01	-0.028 ± 0.764	0.338 ± 0.961
73937	1700029M20Rik	RIKEN cDNA 1700029M20 gene	M012347_01	0.618 ± 0.575	0.691 ± 0.577
67490	1810074P20Rik	RIKEN cDNA 1810074P20 gene	M007902_01	0.82 ± 0.367	0.52 ± 0.382
66439	2010012O05Rik	RIKEN cDNA 2010012O05 gene	M010982_01	0.298 ± 0.302	1.485 ± 0.376
67693	2310003F16Rik	RIKEN cDNA 2310003F16 gene	M008002_01	0.59 ± 0.502	1.149 ± 0.541
381845	2310014L17Rik	RIKEN cDNA 2310014L17 gene	M012639_01	-0.06 ± 0.491	0.945 ± 0.948
66421	2410004B18Rik	RIKEN cDNA 2410004B18 gene	M008125_01	0.989 ± 0.561	0.815 ± 0.504
67683	2610029G23Rik	RIKEN cDNA 2610029G23 gene	M013189_01	0.832 ± 0.52	0.772 ± 0.47
67267	2900010M23Rik	RIKEN cDNA 2900010M23 gene	M008912_01	0.688 ± 0.514	0.774 ± 0.374
74864	4930449E01Rik	RIKEN cDNA 4930449E01 gene	M012449_01	0.544 ± 0.631	0.693 ± 0.671
71248	4933428M09Rik	RIKEN cDNA 4933428M09 gene	M012155_01	0.537 ± 0.502	0.759 ± 0.516
71275	4933437F05Rik	RIKEN cDNA 4933437F05 gene	M010830_01	0.531 ± 0.711	1.13 ± 1.086
321015	5330439B14Rik	RIKEN cDNA 5330439B14 gene	M012774_01	1.068 ± 1.323	0.966 ± 0.73
66665	5730528L13Rik	RIKEN cDNA 5730528L13 gene	M011514_01	0.717 ± 0.492	1.065 ± 0.507
18670	Abcb4	ATP-binding cassette, sub-family B (MDR/TAP), member 4	M002965_01	1.218 ± 0.463	1.175 ± 0.444
64296	Abhd8	abhydrolase domain containing 8	M003719_01	0.829 ± 0.635	0.689 ± 0.672
11565	Adssl1	adenylosuccinate synthetase like 1	M001209_01	1.093 ± 0.327	0.757 ± 0.428
102247	Agpat6	1-acylglycerol-3-phosphate O-acyltransferase 6 (lysophosphatidic acid acyltransferase, zeta)	M000201_01	0.813 ± 0.535	0.766 ± 0.557
108897	Aif1l	allograft inflammatory factor 1-like	M008097_01	0.958 ± 0.569	1.005 ± 0.696
13722	Aimp1	aminoacyl tRNA synthetase complex-interacting multifunctional protein 1	M002675_01	1.047 ± 0.447	0.872 ± 0.498
116852	Akr1c20	aldo-keto reductase family 1, member C20	M009616_01	1.039 ± 0.382	0.841 ± 0.698
11682	Alk	anaplastic lymphoma kinase	M000868_01	0.488 ± 0.347	0.666 ± 0.542
11722	Amy1	amylase 1, salivary	M004610_01	0.964 ± 0.555	0.868 ± 0.837
59008	Anapc5	anaphase-promoting complex subunit 5	M004339_01	1.588 ± 0.713	0.395 ± 0.341
52477	Angel2	angel homolog 2 (Drosophila)	M006248_01	0.634 ± 0.352	0.626 ± 0.306
11735	Ank3	ankyrin 3, epithelial	M001257_01	0.512 ± 0.327	1.524 ± 0.562
66471	Anp32e	acidic (leucine-rich) nuclear phosphoprotein 32 family, member E	M006825_01	1.006 ± 0.37	0.975 ± 0.497
56369	Apip	APAF1 interacting protein	M003886_01	0.445 ± 0.271	0.764 ± 0.228
11811	Apobec2	apolipoprotein B mRNA editing enzyme, catalytic polypeptide 2	M004111_01	0.604 ± 0.508	1.423 ± 0.59
11821	Aprt	adenine phosphoribosyl transferase	M000634_01	0.964 ± 0.535	0.856 ± 0.558
11828	Aqp3	aquaporin 3	M004618_01	1.229 ± 0.647	0.923 ± 0.599
11833	Aqp8	aquaporin 8	M002598_01	0.464 ± 0.39	0.852 ± 0.47
11844	Arf5	ADP-ribosylation factor 5	M001948_01	0.561 ± 0.316	0.821 ± 0.311
77038	Arfgap2	ADP-ribosylation factor GTPase activating protein 2	M010000_01	0.761 ± 0.291	0.741 ± 0.482
71085	Arhgap19	Rho GTPase activating protein 19	M012124_01	0.473 ± 0.75	1.141 ± 0.577
70392	Asb12	ankyrin repeat and SOCS box-containing 12	M010825_01	1.165 ± 0.269	0.501 ± 0.454
11910	Atf3	activating transcription factor 3	M000941_01	0.834 ± 2.195	1.096 ± 0.789
54411	Atp6ap1	ATPase, H+ transporting, lysosomal accessory protein 1	M003626_01	1.355 ± 0.821	0.372 ± 1.415
21871	Atp6v0a2	ATPase, H+ transporting, lysosomal V0 subunit A2	M000368_01	1.407 ± 0.483	1.874 ± 0.43
66290	Atp6v1g1	ATPase, H+ transporting, lysosomal V1 subunit G1	M008962_01	1.883 ± 0.448	1.409 ± 0.761
74268	Aven	apoptosis, caspase activation inhibitor	M012371_01	1.054 ± 0.612	0.579 ± 0.319
23825	Banf1	barrier to autointegration factor 1	M002356_01	0.911 ± 0.288	0.977 ± 0.311
664621	BC003883	cDNA sequence BC003883	M013389_01	0.688 ± 0.573	1.325 ± 0.789
66165	Bccip	BRCA2 and CDKN1A interacting protein	M011630_01	0.934 ± 0.311	0.471 ± 0.498
59058	Bhlhe22	basic helix-loop-helix family, member e22	M006437_01	1.109 ± 0.641	1.001 ± 0.736
30948	Bin1	bridging integrator 1	M001574_01	0.946 ± 0.37	0.816 ± 0.375
26992	Brd7	bromodomain containing 7	M002114_01	0.997 ± 0.39	0.734 ± 0.373
66912	Bzw2	basic leucine zipper and W2 domains 2	M008085_01	0.218 ± 0.408	1.558 ± 0.403
77644	C330007P06Rik	RIKEN cDNA C330007P06 gene	M011865_01	0.81 ± 0.624	0.781 ± 0.561
12330	Canx	calnexin	M006535_01	0.606 ± 0.946	0.967 ± 0.899
23831	Car14	carbonic anhydrase 14	M004666_01	1.003 ± 1.922	0.953 ± 0.733
234388	Ccdc124	coiled-coil domain containing 124	M010039_01	1.051 ± 0.715	0.763 ± 0.456
67163	Ccdc47	coiled-coil domain containing 47	M007736_01	0.871 ± 0.355	0.745 ± 0.349
12450	Ccng1	cyclin G1	M000726_01	0.926 ± 0.612	1.04 ± 0.658
74603	Cd200r3	CD200 receptor 3	M009318_01	0.957 ± 0.443	1.271 ± 0.603
54219	Cd320	CD320 antigen	M002759_01	0.44 ± 0.45	1.002 ± 0.507
12505	Cd44	CD44 antigen	M006327_01	1.054 ± 0.396	0.945 ± 0.536
12544	Cdc45l	cell division cycle 45 homolog (S. cerevisiae)-like	M000410_01	0.823 ± 0.59	0.957 ± 0.393
12554	Cdh13	cadherin 13	M003874_01	0.547 ± 0.263	1.253 ± 0.413
12555	Cdh15	cadherin 15	M000681_01	1.176 ± 0.256	0.647 ± 0.423
104010	Cdh22	cadherin 22	M007446_01	0.864 ± 1.043	1.091 ± 0.547
18557	Cdk18	cyclin-dependent kinase 18	M004162_01	0.516 ± 0.678	1.081 ± 0.607
13445	Cdk2ap1	CDK2 (cyclin-dependent kinase 2)-associated protein 1	M004745_01	0.772 ± 0.396	1.39 ± 0.366
545389	Cep170	centrosomal protein 170	M007324_01	0.684 ± 0.364	0.817 ± 0.635
26370	Cetn2	centrin 2	M003869_01	0.637 ± 0.434	0.767 ± 0.579
66121	Chchd1	coiled-coil-helix-coiled-coil-helix domain containing 1	M008615_01	0.55 ± 0.427	1.056 ± 0.363
93696	Chrac1	chromatin accessibility complex 1	M006399_01	0.939 ± 0.394	0.466 ± 0.382
12715	Ckm	creatine kinase, muscle	M000803_01	1.16 ± 0.908	1.185 ± 0.661
78785	Clip4	CAP-GLY domain containing linker protein family, member 4	M011667_01	0.531 ± 0.786	1.359 ± 0.493
66199	Commd4	COMM domain containing 4	M009911_01	0.405 ± 0.582	1.008 ± 0.417
54451	Cpsf3	cleavage and polyadenylation specificity factor 3	M004252_01	1.076 ± 0.459	1.039 ± 1.181
433375	Creg1	cellular repressor of E1A-stimulated genes 1	M000141_01	1.137 ± 0.65	0.859 ± 0.497
12916	Crem	cAMP responsive element modulator	M002091_01	1.175 ± 0.958	0.751 ± 0.523
22024	Crisp2	cysteine-rich secretory protein 2	M000442_01	0.83 ± 0.716	0.793 ± 0.7
73720	Cst6	cystatin E/M	M009583_01	0.874 ± 0.864	0.787 ± 0.55
52840	Dbndd2	dysbindin (dystrobrevin binding protein 1) domain containing 2	M009999_01	0.724 ± 0.466	0.782 ± 0.747
13191	Dctn1	dynactin 1	M006700_01	1.188 ± 0.41	1.095 ± 0.373
27225	Ddx24	DEAD (Asp-Glu-Ala-Asp) box polypeptide 24	M001374_01	1.139 ± 1.377	0.687 ± 0.48
26901	Deb1	differentially expressed in B16F10 1	M008100_01	0.627 ± 0.385	1.142 ± 0.565
23854	Def8	differentially expressed in FDCP 8	M010020_01	0.779 ± 0.4	0.713 ± 0.284
94223	Dgcr8	DiGeorge syndrome critical region gene 8	M011817_01	-0.02 ± 0.822	0.816 ± 1.259
66375	Dhrs7	dehydrogenase/reductase (SDR family) member 7	M007013_01	0.704 ± 0.267	1.225 ± 0.551
13390	Dlx1	distal-less homeobox 1	M001658_01	-0.028 ± 0.59	0.664 ± 0.855
13406	Dmp1	dentin matrix protein 1	M002423_01	0.578 ± 0.557	1.005 ± 0.538
68598	Dnajc8	DnaJ (Hsp40) homolog, subfamily C, member 8	M009640_01	1.297 ± 0.34	1.512 ± 0.659
69537	Dnase1l1	deoxyribonuclease 1-like 1	M007551_01	0.831 ± 0.361	0.318 ± 0.327
13506	Dsc2	desmocollin 2	M001475_01	0.931 ± 0.856	0.63 ± 0.887
13527	Dtna	dystrobrevin alpha	M007048_01	1.059 ± 0.464	1.01 ± 0.641
27389	Dusp13	dual specificity phosphatase 13	M005264_01	1.305 ± 0.625	0.871 ± 0.367
13542	Dvl1	dishevelled, dsh homolog 1 (Drosophila)	M001188_01	0.914 ± 0.47	0.432 ± 0.573
574405	DXBay18	DNA segment, Chr X, Baylor 18	M011306_01	0.789 ± 0.474	0.841 ± 0.61
13663	Ei24	etoposide induced 2.4 mRNA	M001544_01	0.874 ± 0.596	0.596 ± 0.473
16341	Eif3e	eukaryotic translation initiation factor 3, subunit E	M006924_01	0.766 ± 0.209	1.282 ± 0.714
66085	Eif3f	eukaryotic translation initiation factor 3, subunit F	M013330_01	0.594 ± 0.446	0.979 ± 0.416
54709	Eif3i	eukaryotic translation initiation factor 3, subunit I	M006143_01	0.905 ± 0.453	0.884 ± 0.294
73830	Eif3k	eukaryotic translation initiation factor 3, subunit K	M008917_01	0.865 ± 0.303	0.937 ± 0.413
14791	Emg1	EMG1 nucleolar protein homolog (S. cerevisiae)	M002197_01	0.807 ± 0.338	0.663 ± 0.417
12495	Entpd1	ectonucleoside triphosphate diphosphohydrolase 1	M000983_01	0.981 ± 1.22	0.347 ± 0.864
13822	Epb4.1l2	erythrocyte protein band 4.1-like 2	M006920_01	0.948 ± 0.535	0.771 ± 0.578
13845	Ephb3	Eph receptor B3	M002282_01	0.824 ± 0.364	0.602 ± 0.465
13855	Epn2	epsin 2	M006272_01	1.115 ± 0.683	0.847 ± 0.501
67456	Ergic2	ERGIC and golgi 2	M011218_01	1.156 ± 0.973	0.428 ± 0.705
225363	Etf1	eukaryotic translation termination factor 1	M001336_01	0.661 ± 0.4	0.663 ± 0.265
216169	Fam108a	family with sequence similarity 108, member A	M008940_01	1.325 ± 0.706	0.889 ± 0.213
67726	Fam114a2	family with sequence similarity 114, member A2	M012901_01	1.207 ± 0.273	0.579 ± 0.341
78408	Fam131a	family with sequence similarity 131, member A	M009774_01	1.143 ± 0.406	0.528 ± 0.413
66270	Fam134b	family with sequence similarity 134, member B	M008149_01	0.407 ± 0.472	2.144 ± 0.435
30838	Fbxw4	F-box and WD-40 domain protein 4	M004287_01	1.085 ± 0.438	0.565 ± 0.419
30839	Fbxw5	F-box and WD-40 domain protein 5	M004313_01	0.82 ± 0.271	0.995 ± 0.714
14260	Fmn1	formin 1	M001912_01	0.83 ± 0.536	0.847 ± 0.672
78919	Fndc8	fibronectin type III domain containing 8	M012756_01	1.025 ± 0.463	0.766 ± 0.822
14281	Fos	FBJ osteosarcoma oncogene	M007131_01	0.75 ± 0.568	1.021 ± 0.918
71375	Foxn3	forkhead box N3	M011026_01	1.198 ± 0.689	1.553 ± 0.721
56188	Fxyd1	FXYD domain-containing ion transport regulator 1	M000560_01	1.046 ± 0.398	1.226 ± 0.352
14369	Fzd7	frizzled homolog 7 (Drosophila)	M001803_01	1.183 ± 0.659	0.698 ± 0.766
23881	G3bp2	GTPase activating protein (SH3 domain) binding protein 2	M000818_01	0.994 ± 0.545	1.175 ± 0.396
14388	Gab1	growth factor receptor bound protein 2-associated protein 1	M005834_01	0.867 ± 0.697	1.316 ± 0.661
14394	Gabra1	gamma-aminobutyric acid (GABA) A receptor, subunit alpha 1	M001894_01	0.84 ± 0.599	0.683 ± 0.508
17873	Gadd45b	growth arrest and DNA-damage-inducible 45 beta	M000486_01	1.098 ± 0.475	0.543 ± 0.699
23882	Gadd45g	growth arrest and DNA-damage-inducible 45 gamma	M002583_01	0.802 ± 0.795	0.846 ± 0.695
14431	Gamt	guanidinoacetate methyltransferase	M002326_01	1.072 ± 0.322	0.648 ± 0.669
14376	Ganab	alpha glucosidase 2 alpha neutral subunit	M001117_01	0.668 ± 0.544	0.985 ± 0.735
14450	Gart	phosphoribosylglycinamide formyltransferase	M001640_01	0.92 ± 0.37	0.84 ± 0.476
72972	Gcap14	granule cell antiserum positive 14	M010945_01	1.143 ± 0.515	1.585 ± 0.539
14526	Gcg	glucagon	M006296_01	0.922 ± 0.553	0.664 ± 0.661
100034726	Gm15772	ribosomal protein L26 pseudogene	M007038_01	0.556 ± 0.418	0.959 ± 0.405
110012	Gm16517	predicted gene, Gm16517	M006867_01	1.139 ± 0.556	0.756 ± 0.443
217536	Gm1818	predicted gene 1818	M000029_01	0.893 ± 0.563	0.951 ± 0.806
100041294	Gm3258	predicted gene 3258	M005722_01	0.83 ± 0.362	0.813 ± 0.36
100041294	Gm3258	predicted gene 3258	M011048_01	0.688 ± 0.418	0.697 ± 0.297
100043508	Gm9769	predicted gene 9769	M003681_01	0.965 ± 0.582	0.596 ± 0.466
14694	Gnb2l1	guanine nucleotide binding protein (G protein), beta polypeptide 2 like 1	M007144_01	0.672 ± 0.308	0.99 ± 0.546
14702	Gng2	guanine nucleotide binding protein (G protein), gamma 2	M010406_01	1.162 ± 1.233	0.826 ± 0.784
230737	Gnl2	guanine nucleotide binding protein-like 2 (nucleolar)	M011115_01	0.812 ± 0.778	0.624 ± 1.032
269682	Golga3	golgi autoantigen, golgin subfamily a, 3	M002566_01	1.203 ± 0.856	1.032 ± 0.879
24013	Grk1	G protein-coupled receptor kinase 1	M006807_01	0.984 ± 0.334	0.486 ± 0.623
14866	Gstm5	glutathione S-transferase, mu 5	M000200_01	1.26 ± 0.513	0.747 ± 0.563
14869	Gstp2	glutathione S-transferase, pi 2	M006897_01	0.624 ± 0.353	0.964 ± 0.584
71828	Gtf2a1l	general transcription factor IIA, 1-like	M010587_01	1.248 ± 1.781	0.709 ± 0.857
27357	Gyg	glycogenin	M002193_01	0.665 ± 0.242	1.11 ± 0.317
14936	Gys1	glycogen synthase 1, muscle	M004720_01	0.698 ± 0.385	1.019 ± 0.277
14651	Hagh	hydroxyacyl glutathione hydrolase	M010045_01	1.171 ± 0.46	1.039 ± 1.356
219072	Haus4	HAUS augmin-like complex, subunit 4	M008941_01	1.333 ± 0.418	0.374 ± 0.514
15184	Hdac5	histone deacetylase 5	M003725_01	0.501 ± 0.748	1.123 ± 0.411
76987	Hdhd2	haloacid dehalogenase-like hydrolase domain containing 2	M008617_01	0.787 ± 0.247	0.601 ± 0.289
76987	Hdhd2	haloacid dehalogenase-like hydrolase domain containing 2	M013158_01	0.623 ± 0.471	0.727 ± 0.303
15206	Hes2	hairy and enhancer of split 2 (Drosophila)	M005387_01	1.288 ± 0.452	0.959 ± 0.713
74770	Hhatl	hedgehog acyltransferase-like	M010029_01	1.189 ± 0.332	0.754 ± 0.359
15254	Hint1	histidine triad nucleotide binding protein 1	M000133_01	0.678 ± 0.387	0.832 ± 0.638
15260	Hira	histone cell cycle regulation defective homolog A (S. cerevisiae)	M003085_01	1.081 ± 0.663	0.525 ± 0.522
107970	Hist1h1t	histone cluster 1, H1t	M002454_01	0.683 ± 0.423	0.772 ± 1.005
68024	Hist1h2bc	histone cluster 1, H2bc	M007669_01	0.599 ± 0.478	1.053 ± 0.671
97122	Hist2h4	histone cluster 2, H4	M006489_01	0.73 ± 0.271	1.254 ± 0.67
15426	Hoxc8	homeobox C8	M002135_01	0.795 ± 0.513	1.043 ± 0.764
15465	Hrh1	histamine receptor H1	M005547_01	0.962 ± 0.416	0.688 ± 0.36
15525	Hspa4	heat shock protein 4	M000331_01	0.471 ± 0.561	1.139 ± 0.552
56534	Hspb3	heat shock protein 3	M004928_01	0.791 ± 0.276	1.183 ± 0.455
15965	Ifna2	interferon alpha 2	M002929_01	0.909 ± 0.618	0.773 ± 0.701
55978	Ift20	intraflagellar transport 20 homolog (Chlamydomonas)	M002505_01	1.049 ± 0.37	0.589 ± 0.417
111975	Igf2as	insulin-like growth factor 2, antisense	M006266_01	0.689 ± 0.447	0.698 ± 0.99
107527	Il1rl2	interleukin 1 receptor-like 2	M011763_01	0.782 ± 0.45	1.136 ± 1.276
14204	Il4i1	interleukin 4 induced 1	M000891_01	0.83 ± 1.736	0.565 ± 0.866
70020	Ino80b	INO80 complex subunit B	M008444_01	0.95 ± 0.909	0.957 ± 0.712
16370	Irs4	insulin receptor substrate 4	M005873_01	1.181 ± 0.524	0.47 ± 0.462
18519	Kat2b	K(lysine) acetyltransferase 2B	M004831_01	0.739 ± 1.321	0.797 ± 0.528
72330	Kbtbd5	kelch repeat and BTB (POZ) domain containing 5	M010185_01	0.651 ± 0.646	1.097 ± 0.517
16573	Kif5b	kinesin family member 5B	M001179_01	1.01 ± 0.798	1.037 ± 0.426
16596	Klf1	Kruppel-like factor 1 (erythroid)	M001856_01	0.781 ± 0.591	0.707 ± 0.499
66277	Klf15	Kruppel-like factor 15	M009825_01	0.525 ± 0.557	0.815 ± 0.611
16783	Lamp1	lysosomal-associated membrane protein 1	M003152_01	0.685 ± 0.294	0.786 ± 0.353
30949	Lcmt1	leucine carboxyl methyltransferase 1	M008606_01	0.561 ± 0.204	0.558 ± 0.153
16822	Lcp2	lymphocyte cytosolic protein 2	M000632_01	1.503 ± 0.569	1.032 ± 0.862
16852	Lgals1	lectin, galactose binding, soluble 1	M005146_01	0.857 ± 0.478	1.439 ± 0.294
269629	Lhfpl3	lipoma HMGIC fusion partner-like 3	M010049_01	-0.035 ± 1.052	0.54 ± 0.709
16880	Lifr	leukemia inhibitory factor receptor	M001106_01	0.954 ± 0.527	0.647 ± 0.435
16885	Limk1	LIM-domain containing, protein kinase	M003062_01	0.882 ± 0.486	0.47 ± 0.448
100046693	LOC100046693	similar to mKIAA1397 protein	M008549_01	0.519 ± 0.529	0.972 ± 0.439
236598	LOC236598	28S ribosomal RNA	M006400_01	0.617 ± 0.493	0.898 ± 0.679
94352	Loxl2	lysyl oxidase-like 2	M006166_01	1.103 ± 0.585	0.349 ± 0.313
268490	Lsm12	LSM12 homolog (S. cerevisiae)	M010376_01	1.259 ± 0.618	1.148 ± 0.767
50783	Lsm4	LSM4 homolog, U6 small nuclear RNA associated (S. cerevisiae)	M007384_01	0.682 ± 0.411	0.912 ± 0.77
66094	Lsm7	LSM7 homolog, U6 small nuclear RNA associated (S. cerevisiae)	M008604_01	0.581 ± 0.306	1.452 ± 0.633
72585	Lypd1	Ly6/Plaur domain containing 1	M009254_01	0.649 ± 0.648	0.816 ± 0.423
17193	Mbd4	methyl-CpG binding domain protein 4	M003490_01	0.935 ± 0.618	1.036 ± 0.689
66405	Mcts2	malignant T cell amplified sequence 2	M010110_01	0.592 ± 0.516	0.806 ± 0.344
80509	Med8	mediator of RNA polymerase II transcription, subunit 8 homolog (yeast)	M004829_01	1.13 ± 0.603	1.121 ± 0.838
17260	Mef2c	myocyte enhancer factor 2C	M003818_01	0.384 ± 0.796	1.085 ± 0.48
17288	Mep1b	meprin 1 beta	M000937_01	0.506 ± 0.331	0.735 ± 0.446
17349	Mlf1	myeloid leukemia factor 1	M002672_01	0.807 ± 0.506	1.115 ± 0.498
56524	Mpp6	membrane protein, palmitoylated 6 (MAGUK p55 subfamily member 6)	M006527_01	0.895 ± 0.553	0.808 ± 0.489
56524	Mpp6	membrane protein, palmitoylated 6 (MAGUK p55 subfamily member 6)	M004920_01	0.659 ± 0.478	0.65 ± 0.567
77015	Mpped2	metallophosphoesterase domain containing 2	M010177_01	0.894 ± 0.934	1.413 ± 0.848
93734	Mpv17l	Mpv17 transgene, kidney disease mutant-like	M010781_01	0.907 ± 0.466	0.977 ± 0.973
23942	Mta2	metastasis-associated gene family, member 2	M003921_01	0.888 ± 0.481	0.65 ± 0.452
17777	Mttp	microsomal triglyceride transfer protein	M001021_01	0.87 ± 0.517	0.763 ± 0.677
16918	Mycl1	v-myc myelocytomatosis viral oncogene homolog 1, lung carcinoma derived (avian)	M000337_01	1.11 ± 0.638	0.416 ± 0.379
68043	N6amt2	N-6 adenine-specific DNA methyltransferase 2 (putative)	M010125_01	0.663 ± 0.66	1.823 ± 0.352
17955	Nap1l4	nucleosome assembly protein 1-like 4	M000985_01	0.792 ± 0.404	0.689 ± 0.498
59125	Nek7	NIMA (never in mitosis gene a)-related expressed kinase 7	M006442_01	1.111 ± 0.355	0.924 ± 0.329
66208	Nenf	neuron derived neurotrophic factor	M010351_01	0.575 ± 0.436	0.739 ± 0.255
18021	Nfatc3	nuclear factor of activated T-cells, cytoplasmic, calcineurin-dependent 3	M001076_01	1.426 ± 0.642	0.766 ± 0.639
18029	Nfic	nuclear factor I/C	M006692_01	0.958 ± 0.403	0.492 ± 0.473
83485	Ngrn	neugrin, neurite outgrowth associated	M007620_01	0.732 ± 0.315	0.753 ± 0.262
69721	Nkiras1	NFKB inhibitor interacting Ras-like protein 1	M003937_01	0.426 ± 0.398	0.722 ± 0.491
66454	Nmnat1	nicotinamide nucleotide adenylyltransferase 1	M010774_01	0.621 ± 0.465	1.651 ± 0.39
110109	Nop2	NOP2 nucleolar protein homolog (yeast)	M008798_01	0.93 ± 0.804	0.81 ± 0.385
53885	Nphp1	nephronophthisis 1 (juvenile) homolog (human)	M004824_01	0.285 ± 0.744	0.943 ± 0.862
64011	Nrgn	neurogranin	M008958_01	1.009 ± 0.552	0.713 ± 0.815
68106	Nt5c3l	5'-nucleotidase, cytosolic III-like	M012962_01	0.831 ± 0.41	0.655 ± 0.958
71207	Nudt4	nudix (nucleoside diphosphate linked moiety X)-type motif 4	M013359_01	0.417 ± 0.418	1.002 ± 0.539
18245	Oaz1	ornithine decarboxylase antizyme 1	M000206_01	0.919 ± 0.443	0.645 ± 0.43
18247	Oaz2	ornithine decarboxylase antizyme 2	M000202_01	0.544 ± 0.317	0.925 ± 0.338
18312	Olfr15	olfactory receptor 15	M005310_01	0.72 ± 0.307	0.791 ± 0.433
66786	Olfr701	olfactory receptor 701	M011944_01	0.82 ± 0.616	0.751 ± 0.862
72284	Oraov1	oral cancer overexpressed 1	M009223_01	0.898 ± 0.331	0.738 ± 0.269
72085	Osgepl1	O-sialoglycoprotein endopeptidase-like 1	M008663_01	1.036 ± 0.547	0.748 ± 0.511
18453	P4hb	prolyl 4-hydroxylase, beta polypeptide	M003148_01	0.611 ± 0.333	0.918 ± 0.368
67869	Paip2	polyadenylate-binding protein-interacting protein 2	M008933_01	0.674 ± 0.401	1.095 ± 0.518
93737	Pard6g	par-6 partitioning defective 6 homolog gamma (C. elegans)	M008078_01	0.841 ± 0.386	0.71 ± 0.327
18521	Pcbp2	poly(rC) binding protein 2	M000031_01	1.457 ± 0.728	0.663 ± 0.651
67399	Pdlim7	PDZ and LIM domain 7	M007049_01	1.452 ± 0.556	0.932 ± 0.461
56093	Pfpl	pore forming protein-like	M006367_01	0.905 ± 0.637	0.81 ± 0.98
233575	Pgap2	post-GPI attachment to proteins 2	M008586_01	0.483 ± 0.443	1.207 ± 0.491
66681	Pgm1	phosphoglucomutase 1	M006996_01	0.54 ± 0.652	0.96 ± 0.684
73373	Phospho2	phosphatase, orphan 2	M007259_01	1.059 ± 0.45	0.734 ± 0.873
55981	Pigb	phosphatidylinositol glycan anchor biosynthesis, class B	M006618_01	0.562 ± 0.632	0.953 ± 0.676
117150	Pip4k2c	phosphatidylinositol-5-phosphate 4-kinase, type II, gamma	M007806_01	0.623 ± 0.512	0.747 ± 0.773
73616	Pldi	polymorphic derived intron containing	M012322_01	1.068 ± 0.373	0.877 ± 0.727
18972	Pold2	polymerase (DNA directed), delta 2, regulatory subunit	M004732_01	1.159 ± 0.446	0.568 ± 0.937
67967	Pold3	polymerase (DNA-directed), delta 3, accessory subunit	M009611_01	0.892 ± 1.003	0.934 ± 0.883
20021	Polr2c	polymerase (RNA) II (DNA directed) polypeptide C	M000753_01	1.379 ± 0.558	0.919 ± 0.501
69920	Polr2i	polymerase (RNA) II (DNA directed) polypeptide I	M008981_01	0.66 ± 0.423	0.736 ± 0.384
68273	Pomgnt1	protein O-linked mannose beta1,2-N-acetylglucosaminyltransferase	M006979_01	0.781 ± 0.767	1.186 ± 0.461
19042	Ppm1a	protein phosphatase 1A, magnesium dependent, alpha isoform	M001310_01	1.068 ± 0.389	0.505 ± 0.332
71887	Ppm1j	protein phosphatase 1J	M009414_01	0.932 ± 0.315	1.032 ± 0.455
19045	Ppp1ca	protein phosphatase 1, catalytic subunit, alpha isoform	M006968_01	0.682 ± 0.374	0.766 ± 0.244
17872	Ppp1r15a	protein phosphatase 1, regulatory (inhibitor) subunit 15A	M001423_01	0.776 ± 2.298	1.064 ± 0.698
58200	Ppp1r1a	protein phosphatase 1, regulatory (inhibitor) subunit 1A	M006416_01	0.054 ± 0.355	1.836 ± 0.447
70779	Prdm5	PR domain containing 5	M012959_01	0.265 ± 0.312	0.822 ± 0.827
70779	Prdm5	PR domain containing 5	M008200_01	0.86 ± 0.388	0.556 ± 0.702
19082	Prkag1	protein kinase, AMP-activated, gamma 1 non-catalytic subunit	M006698_01	0.913 ± 0.52	0.572 ± 0.419
66801	Prkrip1	Prkr interacting protein 1 (IL11 inducible)	M009189_01	0.585 ± 0.21	0.922 ± 0.338
100678	Psph	phosphoserine phosphatase	M007294_01	1.029 ± 0.584	0.668 ± 0.414
19222	Ptgir	prostaglandin I receptor (IP)	M006562_01	1.287 ± 1.019	1.093 ± 0.443
19244	Ptp4a2	protein tyrosine phosphatase 4a2	M002190_01	1.06 ± 0.603	0.516 ± 0.469
19245	Ptp4a3	protein tyrosine phosphatase 4a3	M001454_01	1.019 ± 0.552	0.447 ± 0.409
30963	Ptpla	protein tyrosine phosphatase-like (proline instead of catalytic arginine), member a	M004229_01	1.265 ± 0.583	0.185 ± 0.468
13924	Ptprv	protein tyrosine phosphatase, receptor type, V	M001607_01	-0.015 ± 0.841	0.734 ± 0.727
97541	Qars	glutaminyl-tRNA synthetase	M007928_01	0.896 ± 0.32	0.831 ± 0.308
100972	Rab28	RAB28, member RAS oncogene family	M009871_01	0.848 ± 0.39	1.04 ± 0.506
19349	Rab7	RAB7, member RAS oncogene family	M001516_01	0.944 ± 0.235	0.866 ± 0.158
14470	Rabac1	Rab acceptor 1 (prenylated)	M003684_01	0.636 ± 0.6	0.886 ± 0.441
54189	Rabep1	rabaptin, RAB GTPase binding effector protein 1	M002293_01	0.762 ± 0.444	0.579 ± 0.517
19358	Rad23a	RAD23a homolog (S. cerevisiae)	M004906_01	0.707 ± 0.546	0.709 ± 0.384
19362	Rad51ap1	RAD51 associated protein 1	M002480_01	1.073 ± 0.516	0.858 ± 0.797
51801	Ramp1	receptor (calcitonin) activity modifying protein 1	M001144_01	0.19 ± 0.549	1.303 ± 0.479
66532	Rep15	RAB15 effector protein	M010213_01	1.187 ± 0.476	1.046 ± 0.666
19791	Rn18s	18S ribosomal RNA	M005716_01	2.422 ± 0.717	3.004 ± 1.118
19791	Rn18s	18S ribosomal RNA	M002010_01	0.343 ± 0.466	1.262 ± 0.374
69724	Rnaseh2a	ribonuclease H2, large subunit	M013310_01	0.629 ± 0.309	0.482 ± 0.185
14000	Rnasen	ribonuclease III, nuclear	M009134_01	1.146 ± 0.691	1.06 ± 0.612
83409	Robld3	roadblock domain containing 3	M009908_01	0.587 ± 0.289	0.759 ± 0.34
19883	Rora	RAR-related orphan receptor alpha	M002529_01	0.972 ± 0.877	0.784 ± 1.376
52187	Rragd	Ras-related GTP binding D	M012074_01	0.712 ± 0.266	0.657 ± 0.401
18114	Rrp1	ribosomal RNA processing 1 homolog (S. cerevisiae)	M004807_01	0.313 ± 0.876	0.951 ± 0.521
67223	Rrp15	ribosomal RNA processing 15 homolog (S. cerevisiae)	M009678_01	1.05 ± 0.515	0.763 ± 0.617
20167	Rtn2	reticulon 2 (Z-band associated protein)	M003832_01	0.866 ± 0.418	0.483 ± 0.303
20174	Ruvbl2	RuvB-like protein 2	M004655_01	0.981 ± 0.894	0.681 ± 0.447
20199	S100a5	S100 calcium binding protein A5	M003351_01	0.855 ± 0.209	0.5 ± 0.327
20209	Saa2	serum amyloid A 2	M003602_01	-0.02 ± 0.725	0.366 ± 0.69
60406	Sap30	sin3 associated polypeptide	M006320_01	1.287 ± 0.564	1.397 ± 0.315
20230	Satb1	special AT-rich sequence binding protein 1	M001573_01	1.376 ± 0.948	0.743 ± 0.442
20357	Sema5b	sema domain, seven thrombospondin repeats (type 1 and type 1-like), transmembrane domain (TM) and short cytoplasmic domain, (semaphorin) 5B	M004990_01	1.187 ± 1.747	0.772 ± 0.442
71599	Senp8	SUMO/sentrin specific peptidase 8	M010812_01	0.696 ± 0.421	0.637 ± 0.428
56747	Sez6l	seizure related 6 homolog like	M006382_01	0.842 ± 0.297	1.023 ± 0.686
20400	Sh2d1a	SH2 domain protein 1A	M003483_01	1.838 ± 0.273	0.989 ± 0.888
27371	Sh2d2a	SH2 domain protein 2A	M012909_01	0.814 ± 0.595	0.838 ± 0.643
21402	Skp1a	S-phase kinase-associated protein 1A	M005122_01	0.605 ± 0.287	0.9 ± 0.372
20536	Slc4a3	solute carrier family 4 (anion exchanger), member 3	M001987_01	0.97 ± 0.917	1.721 ± 0.87
14411	Slc6a12	solute carrier family 6 (neurotransmitter transporter, betaine/GABA), member 12	M003698_01	1.207 ± 0.722	0.823 ± 0.968
54380	Smarcal1	SWI/SNF related matrix associated, actin dependent regulator of chromatin, subfamily a-like 1	M004760_01	0.89 ± 0.824	0.863 ± 0.53
66993	Smarcd3	SWI/SNF related, matrix associated, actin dependent regulator of chromatin, subfamily d, member 3	M011512_01	0.914 ± 0.497	0.803 ± 0.489
29856	Smtn	smoothelin	M004765_01	0.476 ± 0.544	1.023 ± 0.412
226830	Smyd2	SET and MYND domain containing 2	M011806_01	1.259 ± 0.557	0.632 ± 0.499
20646	Snrpn	small nuclear ribonucleoprotein N	M005140_01	0.37 ± 0.209	0.773 ± 0.442
66354	Snw1	SNW domain containing 1	M008292_01	1.046 ± 0.404	0.696 ± 0.729
69226	Snx24	sorting nexing 24	M009235_01	1.247 ± 0.484	0.391 ± 0.506
20773	Sptlc2	serine palmitoyltransferase, long chain base subunit 2	M000167_01	0.473 ± 0.352	1.159 ± 0.695
20813	Srp14	signal recognition particle 14	M006922_01	0.768 ± 0.363	0.887 ± 0.61
20611	Ssty1	spermiogenesis specific transcript on the Y 1	M001953_01	0.9 ± 0.363	0.657 ± 0.359
225742	St8sia5	ST8 alpha-N-acetyl-neuraminide alpha-2,8-sialyltransferase 5	M002067_01	0.954 ± 0.366	0.753 ± 0.459
20869	Stk11	serine/threonine kinase 11	M004432_01	0.83 ± 0.563	0.666 ± 0.505
20892	Stra13	stimulated by retinoic acid 13	M000680_01	0.892 ± 0.501	1.004 ± 0.373
55943	Stx8	syntaxin 8	M001395_01	0.933 ± 0.194	0.914 ± 0.324
20931	Surf2	surfeit gene 2	M006502_01	0.772 ± 1.792	0.838 ± 0.733
68592	Syf2	SYF2 homolog, RNA splicing factor (S. cerevisiae)	M009002_01	0.606 ± 0.451	0.838 ± 0.328
17306	Sypl2	synaptophysin-like 2	M003531_01	1.223 ± 0.494	0.241 ± 0.344
67231	Tbc1d20	TBC1 domain family, member 20	M007237_01	0.804 ± 0.602	0.745 ± 0.565
21401	Tcea3	transcription elongation factor A (SII), 3	M000032_01	1.33 ± 0.422	1.219 ± 1.258
331532	Tceal5	transcription elongation factor A (SII)-like 5	M009884_01	0.887 ± 0.316	1.113 ± 0.382
67673	Tceb2	transcription elongation factor B (SIII), polypeptide 2	M011684_01	0.769 ± 0.481	0.747 ± 0.32
21453	Tcof1	Treacher Collins Franceschetti syndrome 1, homolog	M006990_01	0.757 ± 0.888	0.718 ± 0.457
21645	Tcte1	t-complex-associated testis expressed 1	M000438_01	1.3 ± 0.404	1.415 ± 0.679
106529	Tecr	trans-2,3-enoyl-CoA reductase	M012913_01	1.088 ± 0.461	0.824 ± 0.573
106529	Tecr	trans-2,3-enoyl-CoA reductase	M011566_01	0.407 ± 0.368	1.418 ± 0.391
66131	Tipin	timeless interacting protein	M008124_01	1.222 ± 0.349	0.389 ± 0.9
68212	Tmbim4	transmembrane BAX inhibitor motif containing 4	M008871_01	0.719 ± 0.348	0.683 ± 0.607
69804	Tmem147	transmembrane protein 147	M013022_01	0.674 ± 0.377	0.633 ± 0.467
382030	Tmem188	transmembrane protein 188	M008877_01	0.733 ± 0.574	0.658 ± 0.425
66836	Tmem223	transmembrane protein 223	M011583_01	0.575 ± 0.403	0.733 ± 0.451
69671	Tmem52	transmembrane protein 52	M010151_01	1.514 ± 0.653	0.618 ± 0.356
68777	Tmem53	transmembrane protein 53	M007893_01	1.135 ± 0.575	0.6 ± 0.426
50874	Tmod4	tropomodulin 4	M005591_01	1.183 ± 0.473	1.519 ± 0.41
67976	Trabd	TraB domain containing	M008214_01	0.845 ± 0.303	0.529 ± 0.409
22040	Trex1	three prime repair exonuclease 1	M003200_01	-0.046 ± 0.939	0.596 ± 0.784
58522	Trim54	tripartite motif-containing 54	M006424_01	1.161 ± 0.374	1.126 ± 0.214
22094	Tshb	thyroid stimulating hormone, beta subunit	M001410_01	0.997 ± 0.709	1.18 ± 0.537
72236	Tsnaxip1	translin-associated factor X (Tsnax) interacting protein 1	M010252_01	0.562 ± 0.555	1.089 ± 0.773
22122	Tsta3	tissue specific transplantation antigen P35B	M003708_01	0.752 ± 0.286	0.786 ± 0.461
67123	Ubap1	ubiquitin-associated protein 1	M008965_01	1.251 ± 0.344	0.753 ± 0.329
68926	Ubap2	ubiquitin-associated protein 2	M009949_01	0.787 ± 0.317	0.567 ± 0.42
66530	Ubxn6	UBX domain protein 6	M008481_01	0.742 ± 0.307	0.608 ± 0.566
67205	Utp11l	UTP11-like, U3 small nucleolar ribonucleoprotein, (yeast)	M011804_01	0.726 ± 0.341	0.602 ± 0.676
22318	Vamp2	vesicle-associated membrane protein 2	M004234_01	0.653 ± 0.436	0.863 ± 1.501
53620	Vamp5	vesicle-associated membrane protein 5	M005072_01	0.635 ± 0.485	1.292 ± 0.477
22310	Vmn2r42	vomeronasal 2, receptor 42	M002163_01	0.803 ± 0.337	0.708 ± 0.464
224705	Vps52	vacuolar protein sorting 52 (yeast)	M003520_01	1.289 ± 0.969	0.979 ± 1.017
53611	Vti1a	vesicle transport through interaction with t-SNAREs homolog 1A (yeast)	M002883_01	0.818 ± 0.407	0.897 ± 0.527
57315	Wdr46	WD repeat domain 46	M000829_01	0.498 ± 0.612	0.892 ± 0.359
67866	Wfdc1	WAP four-disulfide core domain 1	M011027_01	0.953 ± 0.515	0.653 ± 0.292
22608	Ybx1	Y box protein 1	M003551_01	0.394 ± 0.551	0.948 ± 0.331
16969	Zbtb7a	zinc finger and BTB domain containing 7a	M003515_01	0.482 ± 0.438	0.847 ± 0.598
67106	Zbtb8os	zinc finger and BTB domain containing 8 opposite strand	M009566_01	0.897 ± 0.574	0.917 ± 0.547
70579	Zc3h11a	zinc finger CCCH type containing 11A	M013428_01	0.999 ± 0.606	0.603 ± 0.327
67302	Zc3h13	zinc finger CCCH type containing 13	M011241_01	0.799 ± 0.823	1.105 ± 0.748
59057	Zfp191	zinc finger protein 191	M006158_01	1.141 ± 1.186	0.654 ± 0.635
69623	Zfp33b	zinc finger protein 33B	M010688_01	0.95 ± 0.387	1.053 ± 0.727
72230	Zfp558	zinc finger protein 558	M010474_01	0.739 ± 0.362	0.58 ± 0.537
22754	Zfp92	zinc finger protein 92	M001993_01	0.954 ± 0.491	0.56 ± 0.363
22759	Zfp97	zinc finger protein 97	M001690_01	0.332 ± 0.684	0.986 ± 0.524

## Sheet: All positives
Gene Ontology enrichment performed with the Gene Ontology Tree Machine tool (GOTM, http://bioinfo.vanderbilt.edu/gotm)
cellular component----mitochondrion----GO:0005739
C=708;O=243;E=161.29;R=1.51;rawP=1.97e-13;adjP=9.26e-11
100048676		ENSMUSG00000032263	100048676 12040	Bckdhb	2-oxoisovalerate dehydrogenase subunit beta, mitochondrial Precursor (EC 1.2.4.4)(Branched-chain alpha-keto acid dehydrogenase E1 component beta chain)(BCKDH E1-beta) [Source:UniProtKB/Swiss-Prot;Acc:Q6P3A8]
74316		ENSMUSG00000021241	74316	Isca2	Iron-sulfur cluster assembly 2 homolog, mitochondrial Precursor (HESB-like domain-containing protein 1) [Source:UniProtKB/Swiss-Prot;Acc:Q9DCB8]
66488		ENSMUSG00000057497	66488 625796 623133	2010309E21Rik	Protein FAM136A [Source:UniProtKB/Swiss-Prot;Acc:Q9CR98]
12372		ENSMUSG00000007122	12372	Casq1	Calsequestrin-1 Precursor (Calsequestrin, skeletal muscle isoform) [Source:UniProtKB/Swiss-Prot;Acc:O09165]
57279		ENSMUSG00000032602	57279	Slc25a20	Mitochondrial carnitine/acylcarnitine carrier protein (Carnitine/acylcarnitine translocase)(mCAC)(CAC)(Solute carrier family 25 member 20) [Source:UniProtKB/Swiss-Prot;Acc:Q9Z2Z6]
64655		ENSMUSG00000032459	64655	Mrps22	28S ribosomal protein S22, mitochondrial (S22mt)(MRP-S22) [Source:UniProtKB/Swiss-Prot;Acc:Q9CXW2]
67273		ENSMUSG00000026260	67273	Ndufa10	NADH dehydrogenase [ubiquinone] 1 alpha subcomplex subunit 10, mitochondrial Precursor (NADH-ubiquinone oxidoreductase 42 kDa subunit)(Complex I-42kD)(CI-42kD) [Source:UniProtKB/Swiss-Prot;Acc:Q99LC3]
80707		ENSMUSG00000004637	80707	Wwox	WW domain-containing oxidoreductase (EC 1.1.1.-) [Source:UniProtKB/Swiss-Prot;Acc:Q91WL8]
15929		ENSMUSG00000002010	15929	Idh3g	Isocitrate dehydrogenase [NAD] subunit gamma, mitochondrial Precursor (EC 1.1.1.41)(Isocitric dehydrogenase)(NAD(+)-specific ICDH) [Source:UniProtKB/Swiss-Prot;Acc:P70404]
595136		ENSMUSG00000028648	595136	Ndufs5	NADH dehydrogenase [ubiquinone] iron-sulfur protein 5 (NADH-ubiquinone oxidoreductase 15 kDa subunit)(Complex I-15 kDa)(CI-15 kDa) [Source:UniProtKB/Swiss-Prot;Acc:Q99LY9]
27398		ENSMUSG00000002767	27398	Mrpl2	39S ribosomal protein L2, mitochondrial Precursor (L2mt)(MRP-L2) [Source:UniProtKB/Swiss-Prot;Acc:Q9D773]
75398		ENSMUSG00000015672	75398	Mrpl32	39S ribosomal protein L32, mitochondrial Precursor (L32mt)(MRP-L32)(Heart-expressed gene 1 protein) [Source:UniProtKB/Swiss-Prot;Acc:Q9DCI9]
67899		ENSMUSG00000039163	67899	Cmc1	COX assembly mitochondrial protein homolog (Cmc1p) [Source:UniProtKB/Swiss-Prot;Acc:Q9CPZ8]
12343		ENSMUSG00000015733	12343	Capza2	F-actin-capping protein subunit alpha-2 (CapZ alpha-2) [Source:UniProtKB/Swiss-Prot;Acc:P47754]
66414		ENSMUSG00000020022	66414	Ndufa12	NADH dehydrogenase [ubiquinone] 1 alpha subcomplex subunit 12 (NADH-ubiquinone oxidoreductase subunit B17.2)(Complex I-B17.2)(CI-B17.2)(CIB17.2) [Source:UniProtKB/Swiss-Prot;Acc:Q7TMF3]
64697		ENSMUSG00000024694	64697	Keg1	Glycine N-acyltransferase-like protein Keg1 (EC 2.3.1.13)(Acyl-CoA:glycine N-acyltransferase protein Keg1)(Kidney-expressed gene 1 protein) [Source:UniProtKB/Swiss-Prot;Acc:Q9DCY0]
56695		ENSMUSG00000026179	56695	Pnkd	Probable hydrolase PNKD (EC 3.-.-.-)(Paroxysmal nonkinesiogenic dyskinesia protein)(Myofibrillogenesis regulator 1)(MR-1) [Source:UniProtKB/Swiss-Prot;Acc:Q69ZP3]
70359		ENSMUSG00000007610	70359	Gtpbp3	tRNA modification GTPase GTPBP3, mitochondrial Precursor (GTP-binding protein 3) [Source:UniProtKB/Swiss-Prot;Acc:Q923K4]
66865		ENSMUSG00000026926	66865	Pmpca	Mitochondrial-processing peptidase subunit alpha Precursor (EC 3.4.24.64)(Alpha-MPP)(P-55) [Source:UniProtKB/Swiss-Prot;Acc:Q9DC61]
67126		ENSMUSG00000016252	67126	Atp5e	ATP synthase subunit epsilon, mitochondrial [Source:UniProtKB/Swiss-Prot;Acc:P56382]
22428		ENSMUSG00000031516	22428	Dctn6	Dynactin subunit 6 (Dynactin subunit p27)(Protein WS-3) [Source:UniProtKB/Swiss-Prot;Acc:Q9WUB4]
70478		ENSMUSG00000021993	100047713 70478	Mipep	Mitochondrial intermediate peptidase Precursor (MIP)(EC 3.4.24.59) [Source:UniProtKB/Swiss-Prot;Acc:A6H611]
100040708		ENSMUSG00000038717	100040708 27425 100047219 100042348	Atp5l	ATP synthase subunit g, mitochondrial (ATPase subunit g) [Source:UniProtKB/Swiss-Prot;Acc:Q9CPQ8]
11636		ENSMUSG00000026817	11636	Ak1	Adenylate kinase isoenzyme 1 (AK 1)(EC 2.7.4.3)(ATP-AMP transphosphorylase 1)(Myokinase) [Source:UniProtKB/Swiss-Prot;Acc:Q9R0Y5]
12865		ENSMUSG00000074218	12865	Cox7a1	Cytochrome c oxidase polypeptide 7A1, mitochondrial Precursor (Cytochrome c oxidase polypeptide VIIa-heart)(Cytochrome c oxidase subunit VIIa-H)(COX VIIa-M) [Source:UniProtKB/Swiss-Prot;Acc:P56392]
68197		ENSMUSG00000030647	675851 68197 635087	Ndufc2	NADH dehydrogenase [ubiquinone] 1 subunit C2 (NADH-ubiquinone oxidoreductase subunit B14.5b)(Complex I-B14.5b)(CI-B14.5b) [Source:UniProtKB/Swiss-Prot;Acc:Q9CQ54]
79044		ENSMUSG00000038880	79044	Mrps34	28S ribosomal protein S34, mitochondrial (S34mt)(MRP-S34)(T-complex expressed gene 2 protein) [Source:UniProtKB/Swiss-Prot;Acc:Q9JIK9]
12050		ENSMUSG00000022194	12050	Bcl2l2	Bcl-2-like protein 2 (Bcl2-L-2)(Apoptosis regulator Bcl-W)(c98) [Source:UniProtKB/Swiss-Prot;Acc:P70345]
21855		ENSMUSG00000031158	21855	Timm17b	Mitochondrial import inner membrane translocase subunit Tim17-B [Source:UniProtKB/Swiss-Prot;Acc:Q9Z0V7]
20655		ENSMUSG00000022982	545845 20655 667310	Sod1	Superoxide dismutase [Cu-Zn] (EC 1.15.1.1) [Source:UniProtKB/Swiss-Prot;Acc:P08228]
66628		ENSMUSG00000011254	66628	Thg1l	Probable tRNA(His) guanylyltransferase (EC 2.7.7.-)(tRNA-histidine guanylyltransferase) [Source:UniProtKB/Swiss-Prot;Acc:Q9CY52]
12896		ENSMUSG00000028607	12896	Cpt2	Carnitine O-palmitoyltransferase 2, mitochondrial Precursor (EC 2.3.1.21)(Carnitine palmitoyltransferase II)(CPT II) [Source:UniProtKB/Swiss-Prot;Acc:P52825]
68917		ENSMUSG00000028470	68917	Hint2	Histidine triad nucleotide-binding protein 2 Precursor (HINT-2)(EC 3.-.-.-)(HINT-3) [Source:UniProtKB/Swiss-Prot;Acc:Q9D0S9]
66242		ENSMUSG00000049960	66242	Mrps16	28S ribosomal protein S16, mitochondrial Precursor (S16mt)(MRP-S16) [Source:UniProtKB/Swiss-Prot;Acc:Q9CPX7]
66230		ENSMUSG00000040269	66230	Mrps28	28S ribosomal protein S28, mitochondrial (S28mt)(MRP-S28) [Source:UniProtKB/Swiss-Prot;Acc:Q9CY16]
14719		ENSMUSG00000031672	14719	Got2	Aspartate aminotransferase, mitochondrial Precursor (mAspAT)(EC 2.6.1.1)(Transaminase A)(Glutamate oxaloacetate transaminase 2)(Fatty acid-binding protein)(FABP-1)(FABPpm) [Source:UniProtKB/Swiss-Prot;Acc:P05202]
433217		ENSMUSG00000025825	433217 66383	Iscu	Iron-sulfur cluster assembly enzyme ISCU, mitochondrial Precursor (NifU-like N-terminal domain-containing protein)(NifU-like protein) [Source:UniProtKB/Swiss-Prot;Acc:Q9D7P6]
68117		ENSMUSG00000025525	68117	Apool	Apolipoprotein O-like Precursor (Protein FAM121A) [Source:UniProtKB/Swiss-Prot;Acc:Q78IK4]
66416		ENSMUSG00000041881	66416	Ndufa7	NADH dehydrogenase [ubiquinone] 1 alpha subcomplex subunit 7 (NADH-ubiquinone oxidoreductase subunit B14.5a)(Complex I-B14.5a)(CI-B14.5a) [Source:UniProtKB/Swiss-Prot;Acc:Q9Z1P6]
13076		ENSMUSG00000032315	13076	Cyp1a1	Cytochrome P450 1A1 (EC 1.14.14.1)(CYPIA1)(P450-P1) [Source:UniProtKB/Swiss-Prot;Acc:P00184]
66142		ENSMUSG00000031231	66142	Cox7b	Cytochrome c oxidase subunit 7B, mitochondrial Precursor (Cytochrome c oxidase polypeptide VIIb) [Source:UniProtKB/Swiss-Prot;Acc:P56393]
67994		ENSMUSG00000030611	67994	Mrps11	28S ribosomal protein S11, mitochondrial Precursor (S11mt)(MRP-S11) [Source:UniProtKB/Swiss-Prot;Acc:Q9DCA2]
14232		ENSMUSG00000019428	14232	Fkbp8	FK506-binding protein 8 (EC 5.2.1.8)(Peptidyl-prolyl cis-trans isomerase)(PPIase)(Rotamase)(38 kDa FK506-binding protein)(mFKBP38)(FKBPR38) [Source:UniProtKB/Swiss-Prot;Acc:O35465]
20930		ENSMUSG00000015790	20930	Surf1	Surfeit locus protein 1 [Source:UniProtKB/Swiss-Prot;Acc:P09925]
15107		ENSMUSG00000027984	15107	Hadh	Hydroxyacyl-coenzyme A dehydrogenase, mitochondrial Precursor (HCDH)(EC 1.1.1.35)(Short chain 3-hydroxyacyl-CoA dehydrogenase)(Medium and short chain L-3-hydroxyacyl-coenzyme A dehydrogenase) [Source:UniProtKB/Swiss-Prot;Acc:Q61425]
17448		ENSMUSG00000019179	17448	Mdh2	Malate dehydrogenase, mitochondrial Precursor (EC 1.1.1.37) [Source:UniProtKB/Swiss-Prot;Acc:P08249]
22059		ENSMUSG00000059552	22059	Trp53	Cellular tumor antigen p53 (Tumor suppressor p53) [Source:UniProtKB/Swiss-Prot;Acc:P02340]
12043		ENSMUSG00000057329	12043	Bcl2	Apoptosis regulator Bcl-2 [Source:UniProtKB/Swiss-Prot;Acc:P10417]
66541		ENSMUSG00000042670	66541	Immp1l	Mitochondrial inner membrane protease subunit 1 (EC 3.4.21.-)(IMP1-like protein) [Source:UniProtKB/Swiss-Prot;Acc:Q9CQU8]
23996		ENSMUSG00000030603	23996	Psmc4	26S protease regulatory subunit 6B (Proteasome 26S subunit ATPase 4)(MB67-interacting protein)(MIP224)(TAT-binding protein 7)(TBP-7)(CIP21) [Source:UniProtKB/Swiss-Prot;Acc:P54775]
15494		ENSMUSG00000062410	15494	Hsd3b3	3 beta-hydroxysteroid dehydrogenase/Delta 5-->4-isomerase type 3 (3-beta-HSD III) [Includes 3-beta-hydroxy-Delta(5)-steroid dehydrogenase(EC 1.1.1.145)(3-beta-hydroxy-5-ene steroid dehydrogenase)(Progesterone reductase);Steroid Delta-isomerase(EC 5.3.3.1)(Delta-5-3-ketosteroid isomerase)] [Source:UniProtKB/Swiss-Prot;Acc:P26150]
68198		ENSMUSG00000002416	68198	Ndufb2	NADH dehydrogenase [ubiquinone] 1 beta subcomplex subunit 2, mitochondrial Precursor (NADH-ubiquinone oxidoreductase AGGG subunit)(Complex I-AGGG)(CI-AGGG) [Source:UniProtKB/Swiss-Prot;Acc:Q9CPU2]
67270		ENSMUSG00000062981	623346 67270	Mrpl42	28S ribosomal protein L42, mitochondrial Precursor (L42mt)(MRP-L42)(28S ribosomal protein S32, mitochondrial)(S32mt)(MRP-S32)(MRP-L31) [Source:UniProtKB/Swiss-Prot;Acc:Q9CPV3]
12869		ENSMUSG00000025488	12869	Cox8b	Cytochrome c oxidase subunit 8B, mitochondrial Precursor (Cytochrome c oxidase subunit 8H)(Cytochrome c oxidase polypeptide VIII-heart)(Cytochrome c oxidase subunit 8-1) [Source:UniProtKB/Swiss-Prot;Acc:P48772]
30058		ENSMUSG00000045455	100045062 100039343 30058	AC102009.20-1	Mitochondrial import inner membrane translocase subunit Tim8 A (Deafness dystonia protein 1 homolog) [Source:UniProtKB/Swiss-Prot;Acc:Q9WVA2]
23986		ENSMUSG00000021417	23986	Peci	Peroxisomal 3,2-trans-enoyl-CoA isomerase (EC 5.3.3.8)(Dodecenoyl-CoA isomerase)(Delta(3),delta(2)-enoyl-CoA isomerase)(D3,D2-enoyl-CoA isomerase) [Source:UniProtKB/Swiss-Prot;Acc:Q9WUR2]
17992		ENSMUSG00000029632	17992	Ndufa4	NADH dehydrogenase [ubiquinone] 1 alpha subcomplex subunit 4 (NADH-ubiquinone oxidoreductase MLRQ subunit)(Complex I-MLRQ)(CI-MLRQ) [Source:UniProtKB/Swiss-Prot;Acc:Q62425]
68735		ENSMUSG00000016833	68735	Mrps18c	28S ribosomal protein S18c, mitochondrial Precursor (MRP-S18-c)(Mrps18c)(MRP-S18-1) [Source:UniProtKB/Swiss-Prot;Acc:Q8R2L5]
66365		ENSMUSG00000030613	100048074 66365	Ccdc90b	Coiled-coil domain-containing protein 90B, mitochondrial Precursor [Source:UniProtKB/Swiss-Prot;Acc:Q8C3X2]
22321		ENSMUSG00000007029	22321	Vars	Valyl-tRNA synthetase (EC 6.1.1.9)(Valine--tRNA ligase)(ValRS)(Protein G7a) [Source:UniProtKB/Swiss-Prot;Acc:Q9Z1Q9]
104130		ENSMUSG00000031059	104130	Ndufb11	NADH dehydrogenase [ubiquinone] 1 beta subcomplex subunit 11, mitochondrial Precursor (NADH-ubiquinone oxidoreductase ESSS subunit)(Complex I-ESSS)(CI-ESSS)(Neuronal protein 15.6)(Np15.6)(p15.6) [Source:UniProtKB/Swiss-Prot;Acc:O09111]
54683		ENSMUSG00000024953	54683	Prdx5	Peroxiredoxin-5, mitochondrial Precursor (EC 1.11.1.15)(Prx-V)(Peroxisomal antioxidant enzyme)(PLP)(Thioredoxin reductase)(Thioredoxin peroxidase PMP20)(Antioxidant enzyme B166)(AOEB166)(Liver tissue 2D-page spot 2D-0014IV) [Source:UniProtKB/Swiss-Prot;Acc:P99029]
18416		ENSMUSG00000031173	18416	Otc	Ornithine carbamoyltransferase, mitochondrial Precursor (EC 2.1.3.3)(Ornithine transcarbamylase)(OTCase) [Source:UniProtKB/Swiss-Prot;Acc:P11725]
68020		ENSMUSG00000037787	68020	2810002N01Rik	UPF0671 protein C14orf153 homolog [Source:UniProtKB/Swiss-Prot;Acc:Q9CQW7]
56072		ENSMUSG00000024972	56072	Lgals12	Galectin-12 [Source:UniProtKB/Swiss-Prot;Acc:Q91VD1]
60441		ENSMUSG00000020775	60441	Mrpl38	39S ribosomal protein L38, mitochondrial Precursor (L38mt)(MRP-L38) [Source:UniProtKB/Swiss-Prot;Acc:Q8K2M0]
11655		ENSMUSG00000032786	11655	Alas1	5-aminolevulinate synthase, nonspecific, mitochondrial Precursor (EC 2.3.1.37)(5-aminolevulinic acid synthase)(Delta-aminolevulinate synthase)(Delta-ALA synthetase)(ALAS-H) [Source:UniProtKB/Swiss-Prot;Acc:Q8VC19]
94067		ENSMUSG00000025208	94067	Mrpl43	39S ribosomal protein L43, mitochondrial Precursor (L43mt)(MRP-L43)(Mitochondrial ribosomal protein bMRP36a) [Source:UniProtKB/Swiss-Prot;Acc:Q99N89]
12261		ENSMUSG00000018446	12261	C1qbp	Complement component 1 Q subcomponent-binding protein, mitochondrial Precursor (Glycoprotein gC1qBP)(C1qBP)(GC1q-R protein) [Source:UniProtKB/Swiss-Prot;Acc:O35658]
67942		ENSMUSG00000062683	100040342 100039108 100046598 67942	Atp5g2	ATP synthase lipid-binding protein, mitochondrial Precursor (ATP synthase proteolipid P2)(ATPase protein 9)(ATPase subunit c) [Source:UniProtKB/Swiss-Prot;Acc:P56383]
12866		ENSMUSG00000032330	12866	Cox7a2	Cytochrome c oxidase polypeptide 7A2, mitochondrial Precursor (Cytochrome c oxidase polypeptide VIIa-liver/heart)(Cytochrome c oxidase subunit VIIa-L) [Source:UniProtKB/Swiss-Prot;Acc:P48771]
78688		ENSMUSG00000014776	78688	Nol3	Nucleolar protein 3 [Source:UniProtKB/Swiss-Prot;Acc:Q9D1X0]
76366		ENSMUSG00000016510	76366	Mtif3	Translation initiation factor IF-3, mitochondrial Precursor (IF-3Mt)(IF3(mt))(IF-3(Mt))(IF3mt) [Source:UniProtKB/Swiss-Prot;Acc:Q9CZD5]
11430		ENSMUSG00000020777	11430	Acox1	Peroxisomal acyl-coenzyme A oxidase 1 (AOX)(EC 1.3.3.6)(Palmitoyl-CoA oxidase) [Source:UniProtKB/Swiss-Prot;Acc:Q9R0H0]
26940		ENSMUSG00000066839	26940	Ecsit	Evolutionarily conserved signaling intermediate in Toll pathway, mitochondrial Precursor (Protein SITPEC) [Source:UniProtKB/Swiss-Prot;Acc:Q9QZH6]
72140		ENSMUSG00000023072	636311 72140	Ccdc123	Coiled-coil domain-containing protein 123, mitochondrial Precursor [Source:UniProtKB/Swiss-Prot;Acc:Q9CZX2]
56248		ENSMUSG00000024782	56248	Ak3	GTP:AMP phosphotransferase mitochondrial (EC 2.7.4.10)(Adenylate kinase 3)(AK 3)(Adenylate kinase 3 alpha-like 1) [Source:UniProtKB/Swiss-Prot;Acc:Q9WTP7]
75597		ENSMUSG00000068184	75597	Ndufaf2	Mimitin, mitochondrial Precursor (Myc-induced mitochondrial protein)(MMTN)(NADH dehydrogenase [ubiquinone] 1 alpha subcomplex assembly factor 2)(NDUFA12-like protein) [Source:UniProtKB/Swiss-Prot;Acc:Q59J78]
68943		ENSMUSG00000028756	68943	Pink1	Serine/threonine-protein kinase PINK1, mitochondrial Precursor (EC 2.7.11.1)(PTEN-induced putative kinase protein 1)(BRPK) [Source:UniProtKB/Swiss-Prot;Acc:Q99MQ3]
16514		ENSMUSG00000070561	16514	Kcnj11	ATP-sensitive inward rectifier potassium channel 11 (Potassium channel, inwardly rectifying subfamily J member 11)(Inward rectifier K(+) channel Kir6.2) [Source:UniProtKB/Swiss-Prot;Acc:Q61743]
56428		ENSMUSG00000027282	56428	Mtch2	Mitochondrial carrier homolog 2 [Source:UniProtKB/Swiss-Prot;Acc:Q791V5]
56551		ENSMUSG00000005354	56551	Txn2	Thioredoxin, mitochondrial Precursor (Mt-Trx)(MTRX)(Thioredoxin-2) [Source:UniProtKB/Swiss-Prot;Acc:P97493]
18618		ENSMUSG00000000301	18618	Pemt	Phosphatidylethanolamine N-methyltransferase (PEAMT)(PEMT)(EC 2.1.1.17)(PEMT2) [Source:UniProtKB/Swiss-Prot;Acc:Q61907]
56520		ENSMUSG00000024177	56520	Nme4	Nucleoside diphosphate kinase, mitochondrial Precursor (NDP kinase, mitochondrial)(NDK)(EC 2.7.4.6)(nm23-M4)(Nucleoside diphosphate kinase D)(NDPKD) [Source:UniProtKB/Swiss-Prot;Acc:Q9WV84]
229211		ENSMUSG00000027710	229211	Acad9	Acyl-CoA dehydrogenase family member 9, mitochondrial Precursor (ACAD-9)(EC 1.3.99.-) [Source:UniProtKB/Swiss-Prot;Acc:Q8JZN5]
56338		ENSMUSG00000038393	56338	Txnip	Thioredoxin-interacting protein (Vitamin D3 up-regulated protein 1) [Source:UniProtKB/Swiss-Prot;Acc:Q8BG60]
67713		ENSMUSG00000027679	67713	Dnajc19	Mitochondrial import inner membrane translocase subunit TIM14 (DnaJ homolog subfamily C member 19) [Source:UniProtKB/Swiss-Prot;Acc:Q9CQV7]
13063		ENSMUSG00000063694	672195 100045925 670717 13063	Cycs	Cytochrome c, somatic [Source:UniProtKB/Swiss-Prot;Acc:P62897]
59010		ENSMUSG00000005803	59010	Sqrdl	Sulfide:quinone oxidoreductase, mitochondrial Precursor (EC 1.-.-.-) [Source:UniProtKB/Swiss-Prot;Acc:Q9R112]
12895		ENSMUSG00000078937	12895	Cpt1b	Carnitine O-palmitoyltransferase 1, muscle isoform (CPT1-M)(EC 2.3.1.21)(Carnitine O-palmitoyltransferase I, muscle isoform)(CPTI-M)(CPT I)(Carnitine palmitoyltransferase 1B) [Source:UniProtKB/Swiss-Prot;Acc:Q924X2]
14782		ENSMUSG00000031584	630729 14782	Gsr	Glutathione reductase, mitochondrial Precursor (GRase)(GR)(EC 1.8.1.7) [Source:UniProtKB/Swiss-Prot;Acc:P47791]
11973		ENSMUSG00000019210	11973	Atp6v1e1	V-type proton ATPase subunit E 1 (V-ATPase subunit E 1)(Vacuolar proton pump subunit E 1)(V-ATPase 31 kDa subunit)(P31) [Source:UniProtKB/Swiss-Prot;Acc:P50518]
21854		ENSMUSG00000062580	21854 636544	Timm17a	Mitochondrial import inner membrane translocase subunit Tim17-A (Inner membrane preprotein translocase Tim17a) [Source:UniProtKB/Swiss-Prot;Acc:Q9Z0V8]
74610		ENSMUSG00000028973	74610	Abcb8	ATP-binding cassette sub-family B member 8, mitochondrial Precursor [Source:UniProtKB/Swiss-Prot;Acc:Q9CXJ4]
57320		ENSMUSG00000028964	57320	Park7	Protein DJ-1 (Parkinson disease protein 7 homolog) [Source:UniProtKB/Swiss-Prot;Acc:Q99LX0]
66885		ENSMUSG00000030861	66885	Acadsb	Short/branched chain specific acyl-CoA dehydrogenase, mitochondrial Precursor (SBCAD)(EC 1.3.99.-)(2-methyl branched chain acyl-CoA dehydrogenase)(2-MEBCAD)(2-methylbutyryl-coenzyme A dehydrogenase)(2-methylbutyryl-CoA dehydrogenase) [Source:UniProtKB/Swiss-Prot;Acc:Q9DBL1]
66052		ENSMUSG00000058076	66052	Sdhc	Succinate dehydrogenase cytochrome b560 subunit, mitochondrial Precursor (Integral membrane protein CII-3)(QPs-1)(QPs1) [Source:UniProtKB/Swiss-Prot;Acc:Q9CZB0]
69163		ENSMUSG00000026248	69163	Mrpl44	39S ribosomal protein L44, mitochondrial Precursor (L44mt)(EC 3.1.26.-)(MRP-L44) [Source:UniProtKB/Swiss-Prot;Acc:Q9CY73]
76614		ENSMUSG00000052337	76614	Immt	Mitochondrial inner membrane protein (Mitofilin) [Source:UniProtKB/Swiss-Prot;Acc:Q8CAQ8]
80907		ENSMUSG00000032370	677144 80907	Lactb	Serine beta-lactamase-like protein LACTB, mitochondrial Precursor (EC 3.4.-.-) [Source:UniProtKB/Swiss-Prot;Acc:Q9EP89]
107734		ENSMUSG00000026087	100044791 621542 100041573 107734	Mrpl30	39S ribosomal protein L30, mitochondrial Precursor (L30mt)(MRP-L30) [Source:UniProtKB/Swiss-Prot;Acc:Q9D7N6]
17527		ENSMUSG00000029144	17527 71752	Mpv17	Protein Mpv17 (Mpv-17) [Source:UniProtKB/Swiss-Prot;Acc:P19258]
71752		ENSMUSG00000029144	17527 71752	Mpv17	Protein Mpv17 (Mpv-17) [Source:UniProtKB/Swiss-Prot;Acc:P19258]
11739		ENSMUSG00000031633	11739	Slc25a4	ADP/ATP translocase 1 (Adenine nucleotide translocator 1)(ANT 1)(ADP,ATP carrier protein 1)(Solute carrier family 25 member 4)(ADP,ATP carrier protein, heart/skeletal muscle isoform T1)(mANC1) [Source:UniProtKB/Swiss-Prot;Acc:P48962]
67680		ENSMUSG00000009863	638710 67680	Sdhb	Succinate dehydrogenase [ubiquinone] iron-sulfur subunit, mitochondrial Precursor (EC 1.3.5.1)(Iron-sulfur subunit of complex II)(Ip) [Source:UniProtKB/Swiss-Prot;Acc:Q9CQA3]
29857		ENSMUSG00000022610	29857	Mapk12	Mitogen-activated protein kinase 12 (EC 2.7.11.24)(Extracellular signal-regulated kinase 6)(ERK-6)(Stress-activated protein kinase 3)(Mitogen-activated protein kinase p38 gamma)(MAP kinase p38 gamma) [Source:UniProtKB/Swiss-Prot;Acc:O08911]
66659		ENSMUSG00000028093	66659	Acp6	Lysophosphatidic acid phosphatase type 6 Precursor (EC 3.1.3.2)(Acid phosphatase 6, lysophosphatidic)(Acid phosphatase-like protein 1)(PACPL1) [Source:UniProtKB/Swiss-Prot;Acc:Q8BP40]
66576		ENSMUSG00000063882	677379 66576	Uqcrh	Cytochrome b-c1 complex subunit 6, mitochondrial Precursor (Ubiquinol-cytochrome c reductase complex 11 kDa protein)(Cytochrome c1 non-heme 11 kDa protein)(Mitochondrial hinge protein)(Complex III subunit VIII)(Complex III subunit 6) [Source:UniProtKB/Swiss-Prot;Acc:P99028]
15199		ENSMUSG00000042770	15199	Hebp1	Heme-binding protein 1 (p22HBP) [Source:UniProtKB/Swiss-Prot;Acc:Q9R257]
52837		ENSMUSG00000034723	52837	Txndc13	Thioredoxin-related transmembrane protein 4 Precursor (Thioredoxin domain-containing protein 13) [Source:UniProtKB/Swiss-Prot;Acc:Q8C0L0]
66169		ENSMUSG00000028998	100048120 66169	Tomm7	Mitochondrial import receptor subunit TOM7 homolog (Translocase of outer membrane 7 kDa subunit homolog) [Source:UniProtKB/Swiss-Prot;Acc:Q9D173]
74142		ENSMUSG00000041168	74142	Lonp1	Lon protease homolog, mitochondrial Precursor (EC 3.4.21.-)(Lon protease-like protein)(LONP)(Mitochondrial ATP-dependent protease Lon)(Serine protease 15) [Source:UniProtKB/Swiss-Prot;Acc:Q8CGK3]
74104		ENSMUSG00000026198	74104	Abcb6	ATP-binding cassette sub-family B member 6, mitochondrial [Source:UniProtKB/Swiss-Prot;Acc:Q9DC29]
69186		ENSMUSG00000070394	69186	1810027O10Rik	UPF0451 protein C17orf61 homolog Precursor [Source:UniProtKB/Swiss-Prot;Acc:Q5F285]
19047		ENSMUSG00000004455	19047	Ppp1cc	Serine/threonine-protein phosphatase PP1-gamma catalytic subunit (PP-1G)(EC 3.1.3.16)(Protein phosphatase 1C catalytic subunit) [Source:UniProtKB/Swiss-Prot;Acc:P63087]
69089		ENSMUSG00000000959	69089	Oxa1l	Mitochondrial inner membrane protein OXA1L Precursor (Oxidase assembly 1-like protein)(OXA1-like protein) [Source:UniProtKB/Swiss-Prot;Acc:Q8BGA9]
22627		ENSMUSG00000020849	22627	Ywhae	14-3-3 protein epsilon (14-3-3E) [Source:UniProtKB/Swiss-Prot;Acc:P62259]
433904		ENSMUSG00000029153	433904	Ociad2	OCIA domain-containing protein 2 [Source:UniProtKB/Swiss-Prot;Acc:Q9D8W7]
66387		ENSMUSG00000024869	66387	Nudt8	Nucleoside diphosphate-linked moiety X motif 8, mitochondrial Precursor (Nudix motif 8)(EC 3.6.1.-) [Source:UniProtKB/Swiss-Prot;Acc:Q9CR24]
71883		ENSMUSG00000029319	627022 71883	Coq2	Para-hydroxybenzoate--polyprenyltransferase, mitochondrial Precursor (PHB:polyprenyltransferase)(EC 2.5.1.-) [Source:UniProtKB/Swiss-Prot;Acc:Q66JT7]
15512		ENSMUSG00000059970	15512	Hspa2	Heat shock-related 70 kDa protein 2 (Heat shock protein 70.2) [Source:UniProtKB/Swiss-Prot;Acc:P17156]
56690		ENSMUSG00000074064	56690	Mlycd	Malonyl-CoA decarboxylase, mitochondrial Precursor (MCD)(EC 4.1.1.9) [Source:UniProtKB/Swiss-Prot;Acc:Q99J39]
11947		ENSMUSG00000025393	11947	Atp5b	ATP synthase subunit beta, mitochondrial Precursor (EC 3.6.3.14) [Source:UniProtKB/Swiss-Prot;Acc:P56480]
74011		ENSMUSG00000023912	74011	Slc25a27	solute carrier family 25, member 27 [Source:RefSeq peptide;Acc:NP_082987]
12716		ENSMUSG00000000308	12716	Ckmt1	Creatine kinase, ubiquitous mitochondrial Precursor (EC 2.7.3.2)(U-MtCK)(Acidic-type mitochondrial creatine kinase)(Mia-CK) [Source:UniProtKB/Swiss-Prot;Acc:P30275]
22335		ENSMUSG00000008892	22335	Vdac3	Voltage-dependent anion-selective channel protein 3 (VDAC-3)(mVDAC3)(Outer mitochondrial membrane protein porin 3) [Source:UniProtKB/Swiss-Prot;Acc:Q60931]
66448		ENSMUSG00000029066	66448	Mrpl20	39S ribosomal protein L20, mitochondrial Precursor (L20mt)(MRP-L20) [Source:UniProtKB/Swiss-Prot;Acc:Q9CQL4]
66694		ENSMUSG00000038462	66694	Uqcrfs1	Cytochrome b-c1 complex subunit Rieske, mitochondrial Precursor (EC 1.10.2.2)(Ubiquinol-cytochrome c reductase iron-sulfur subunit)(Rieske iron-sulfur protein)(RISP)(Complex III subunit 5) [Contains Cytochrome b-c1 complex subunit 11(Ubiquinol-cytochrome c reductase 8 kDa protein)(Complex III subunit IX)] [Source:UniProtKB/Swiss-Prot;Acc:Q9CR68]
66593		ENSMUSG00000029433	66593	Diablo	Diablo homolog, mitochondrial Precursor (Second mitochondria-derived activator of caspase)(Smac protein)(Direct IAP-binding protein with low pI) [Source:UniProtKB/Swiss-Prot;Acc:Q9JIQ3]
67130		ENSMUSG00000022450	67130	Ndufa6	NADH dehydrogenase [ubiquinone] 1 alpha subcomplex subunit 6 (NADH-ubiquinone oxidoreductase B14 subunit)(Complex I-B14)(CI-B14) [Source:UniProtKB/Swiss-Prot;Acc:Q9CQZ5]
15516		ENSMUSG00000023944	15516	Hsp90ab1	Heat shock protein HSP 90-beta (HSP 84)(Tumor-specific transplantation 84 kDa antigen)(TSTA) [Source:UniProtKB/Swiss-Prot;Acc:P11499]
74080		ENSMUSG00000032456	74080	Nmnat3	Nicotinamide mononucleotide adenylyltransferase 3 (NMN adenylyltransferase 3)(EC 2.7.7.1)(Nicotinate-nucleotide adenylyltransferase 1)(NaMN adenylyltransferase 1)(EC 2.7.7.18) [Source:UniProtKB/Swiss-Prot;Acc:Q99JR6]
19055		ENSMUSG00000028161	19055	Ppp3ca	Serine/threonine-protein phosphatase 2B catalytic subunit alpha isoform (EC 3.1.3.16)(Calmodulin-dependent calcineurin A subunit alpha isoform)(CAM-PRP catalytic subunit) [Source:UniProtKB/Swiss-Prot;Acc:P63328]
68015		ENSMUSG00000005981	68015	Trap1	Heat shock protein 75 kDa, mitochondrial Precursor (HSP 75)(Tumor necrosis factor type 1 receptor-associated protein)(TRAP-1)(TNFR-associated protein 1) [Source:UniProtKB/Swiss-Prot;Acc:Q9CQN1]
18673		ENSMUSG00000038845	18673 237880	Phb	Prohibitin (B-cell receptor-associated protein 32)(BAP 32) [Source:UniProtKB/Swiss-Prot;Acc:P67778]
73694		ENSMUSG00000024082	73694	2410091C18Rik	Protein midA homolog, mitochondrial Precursor [Source:UniProtKB/Swiss-Prot;Acc:Q9CWG8]
52469		ENSMUSG00000017188	52469	Ccdc56	Coiled-coil domain-containing protein 56 [Source:UniProtKB/Swiss-Prot;Acc:Q9D2R6]
52443		ENSMUSG00000030706	52443	Mrpl48	39S ribosomal protein L48, mitochondrial Precursor (L48mt)(MRP-L48) [Source:UniProtKB/Swiss-Prot;Acc:Q8JZS9]
100040287		ENSMUSG00000020163	66594 100040287 100048426	Uqcr	Cytochrome b-c1 complex subunit 10 (Ubiquinol-cytochrome c reductase complex 6.4 kDa protein)(Complex III subunit XI)(Complex III subunit 10) [Source:UniProtKB/Swiss-Prot;Acc:Q9CPX8]
54196		ENSMUSG00000022198	54196	Pabpn1	Polyadenylate-binding protein 2 (Poly(A)-binding protein 2)(Poly(A)-binding protein II)(PABII)(Polyadenylate-binding nuclear protein 1)(Nuclear poly(A)-binding protein 1) [Source:UniProtKB/Swiss-Prot;Acc:Q8CCS6]
14626		ENSMUSG00000050553	14626	Gk2	Glycerol kinase 2 (Glycerokinase 2)(GK 2)(EC 2.7.1.30)(Glycerol kinase, testis specific 2)(ATP:glycerol 3-phosphotransferase) [Source:UniProtKB/Swiss-Prot;Acc:Q9WU65]
66071		ENSMUSG00000064254	66071	Ethe1	Protein ETHE1, mitochondrial Precursor (EC 3.-.-.-)(Ethylmalonic encephalopathy protein 1 homolog)(Hepatoma subtracted clone one protein) [Source:UniProtKB/Swiss-Prot;Acc:Q9DCM0]
68611		ENSMUSG00000024181	68611	Mrpl28	39S ribosomal protein L28, mitochondrial Precursor (L28mt)(MRP-L28) [Source:UniProtKB/Swiss-Prot;Acc:Q9D1B9]
52815		ENSMUSG00000031958	52815	Ldhd	Probable D-lactate dehydrogenase, mitochondrial Precursor (Lactate dehydrogenase D)(DLD)(EC 1.1.2.4) [Source:UniProtKB/Swiss-Prot;Acc:Q7TNG8]
67036		ENSMUSG00000018882	67036	Mrpl45	39S ribosomal protein L45, mitochondrial Precursor (L45mt)(MRP-L45) [Source:UniProtKB/Swiss-Prot;Acc:Q9D0Q7]
11409		ENSMUSG00000029545	11409	Acads	Short-chain specific acyl-CoA dehydrogenase, mitochondrial Precursor (SCAD)(EC 1.3.99.2)(Butyryl-CoA dehydrogenase) [Source:UniProtKB/Swiss-Prot;Acc:Q07417]
71807		ENSMUSG00000028107	71807	Tars2	Threonyl-tRNA synthetase, mitochondrial Precursor (EC 6.1.1.3)(Threonine--tRNA ligase)(ThrRS)(Threonyl-tRNA synthetase-like 1) [Source:UniProtKB/Swiss-Prot;Acc:Q3UQ84]
24030		ENSMUSG00000045948	24030	Mrps12	28S ribosomal protein S12, mitochondrial Precursor (S12mt)(MRP-S12)(MT-RPS12) [Source:UniProtKB/Swiss-Prot;Acc:O35680]
12857		ENSMUSG00000031818	12857	Cox4i1	Cytochrome c oxidase subunit 4 isoform 1, mitochondrial Precursor (Cytochrome c oxidase subunit IV isoform 1)(COX IV-1)(Cytochrome c oxidase polypeptide IV) [Source:UniProtKB/Swiss-Prot;Acc:P19783]
57312		ENSMUSG00000031533	57312	Mrps31	28S ribosomal protein S31, mitochondrial Precursor (S31mt)(MRP-S31)(Imogen 38) [Source:UniProtKB/Swiss-Prot;Acc:Q61733]
100047005		ENSMUSG00000028792	11637 100047005	Ak2	Adenylate kinase 2, mitochondrial (AK 2)(EC 2.7.4.3)(ATP-AMP transphosphorylase 2) [Source:UniProtKB/Swiss-Prot;Acc:Q9WTP6]
12862		ENSMUSG00000030785	12862	Cox6a2	Cytochrome c oxidase subunit 6A2, mitochondrial Precursor (Cytochrome c oxidase polypeptide VIa-heart)(COXVIAH) [Source:UniProtKB/Swiss-Prot;Acc:P43023]
20280		ENSMUSG00000028603	20280	Scp2	Non-specific lipid-transfer protein (EC 2.3.1.176)(Propanoyl-CoA C-acyltransferase)(NSL-TP)(Sterol carrier protein 2)(SCP-2)(Sterol carrier protein X)(SCP-X)(SCP-chi)(SCPX) [Source:UniProtKB/Swiss-Prot;Acc:P32020]
11429		ENSMUSG00000022477	11429	Aco2	Aconitate hydratase, mitochondrial Precursor (Aconitase)(EC 4.2.1.3)(Citrate hydro-lyase) [Source:UniProtKB/Swiss-Prot;Acc:Q99KI0]
13171		ENSMUSG00000000340	13171	Dbt	Lipoamide acyltransferase component of branched-chain alpha-keto acid dehydrogenase complex, mitochondrial Precursor (EC 2.3.1.168)(Dihydrolipoyllysine-residue (2-methylpropanoyl)transferase)(Dihydrolipoamide branched chain transacylase)(BCKAD E2 subunit)(E2) [Source:UniProtKB/Swiss-Prot;Acc:P53395]
66592		ENSMUSG00000028455	66592	Stoml2	Stomatin-like protein 2 (SLP-2) [Source:UniProtKB/Swiss-Prot;Acc:Q99JB2]
22018		ENSMUSG00000020673	22018	Tpo	Thyroid peroxidase Precursor (TPO)(EC 1.11.1.8) [Source:UniProtKB/Swiss-Prot;Acc:P35419]
67264		ENSMUSG00000025204	67264	Ndufb8	NADH dehydrogenase [ubiquinone] 1 beta subcomplex subunit 8, mitochondrial Precursor (NADH-ubiquinone oxidoreductase ASHI subunit)(Complex I-ASHI)(CI-ASHI) [Source:UniProtKB/Swiss-Prot;Acc:Q9D6J5]
14599		ENSMUSG00000020713	14599	Gh	Somatotropin Precursor (Growth hormone) [Source:UniProtKB/Swiss-Prot;Acc:P06880]
66495		ENSMUSG00000026032	66495	Ndufb3	NADH dehydrogenase [ubiquinone] 1 beta subcomplex subunit 3 (NADH-ubiquinone oxidoreductase B12 subunit)(Complex I-B12)(CI-B12) [Source:UniProtKB/Swiss-Prot;Acc:Q9CQZ6]
20845		ENSMUSG00000031574	20845	Star	Steroidogenic acute regulatory protein, mitochondrial Precursor (StAR)(StARD1)(Luteinizing hormone-induced protein) [Source:UniProtKB/Swiss-Prot;Acc:P51557]
12908		ENSMUSG00000026853	12908	Crat	Carnitine O-acetyltransferase (Carnitine acetylase)(EC 2.3.1.7)(Carnitine acetyltransferase)(CrAT)(CAT) [Source:UniProtKB/Swiss-Prot;Acc:P47934]
28200		ENSMUSG00000022210	28200	Dhrs4	Dehydrogenase/reductase SDR family member 4 (EC 1.1.1.184)(NADPH-dependent carbonyl reductase/NADP-retinol dehydrogenase)(PHCR)(CR)(Peroxisomal short-chain alcohol dehydrogenase)(NADPH-dependent retinol dehydrogenase/reductase)(NDRD)(mouNRDR) [Source:UniProtKB/Swiss-Prot;Acc:Q99LB2]
18746		ENSMUSG00000032294	18746	Pkm2	Pyruvate kinase isozymes M1/M2 (EC 2.7.1.40)(Pyruvate kinase muscle isozyme) [Source:UniProtKB/Swiss-Prot;Acc:P52480]
22273		ENSMUSG00000025651	22273	Uqcrc1	Cytochrome b-c1 complex subunit 1, mitochondrial Precursor (Ubiquinol-cytochrome-c reductase complex core protein 1)(Core protein I)(Complex III subunit 1) [Source:UniProtKB/Swiss-Prot;Acc:Q9CZ13]
66072		ENSMUSG00000024668	66072	0610038F07Rik	Protein EMI5 homolog, mitochondrial Precursor [Source:UniProtKB/Swiss-Prot;Acc:Q8C6I2]
17827		ENSMUSG00000064068	17827	Mtx1	Metaxin-1 (Mitochondrial outer membrane import complex protein 1) [Source:UniProtKB/Swiss-Prot;Acc:P47802]
66586		ENSMUSG00000027357	66586	Crls1	Cardiolipin synthetase (EC 2.7.8.-)(Cardiolipin synthase)(CLS) [Source:UniProtKB/Swiss-Prot;Acc:Q80ZM8]
74068		ENSMUSG00000010796	74068	Asz1	Ankyrin repeat, SAM and basic leucine zipper domain-containing protein 1 (Germ cell-specific ankyrin, SAM and basic leucine zipper domain-containing protein) [Source:UniProtKB/Swiss-Prot;Acc:Q8VD46]
27397		ENSMUSG00000030879	27397	Mrpl17	39S ribosomal protein L17, mitochondrial Precursor (L17mt)(MRP-L17) [Source:UniProtKB/Swiss-Prot;Acc:Q9D8P4]
15108		ENSMUSG00000025260	15108	Hsd17b10	3-hydroxyacyl-CoA dehydrogenase type-2 (EC 1.1.1.35)(3-hydroxyacyl-CoA dehydrogenase type II)(Type II HADH)(3-hydroxy-2-methylbutyryl-CoA dehydrogenase)(EC 1.1.1.178)(17-beta-hydroxysteroid dehydrogenase 10)(Mitochondrial ribonuclease P protein 2)(Mitochondrial RNase P protein 2)(Endoplasmic reticulum-associated amyloid beta-peptide-binding protein) [Source:UniProtKB/Swiss-Prot;Acc:O08756]
66128		ENSMUSG00000061474	100043826 66128 100047151 100048032 100046779	Mrps36	28S ribosomal protein S36, mitochondrial (S36mt)(MRP-S36) [Source:UniProtKB/Swiss-Prot;Acc:Q9CQX8]
94063		ENSMUSG00000024683	94063	Mrpl16	39S ribosomal protein L16, mitochondrial Precursor (L16mt)(MRP-L16) [Source:UniProtKB/Swiss-Prot;Acc:Q99N93]
19299		ENSMUSG00000028127	19299	Abcd3	ATP-binding cassette sub-family D member 3 (70 kDa peroxisomal membrane protein)(PMP70)(PMP68) [Source:UniProtKB/Swiss-Prot;Acc:P55096]
70980		ENSMUSG00000055643	70980	4931431F19Rik	Putative uncharacterized proteinMCG53927 ; [Source:UniProtKB/TrEMBL;Acc:Q9D4I8]
22334		ENSMUSG00000021771	22334	Vdac2	Voltage-dependent anion-selective channel protein 2 (VDAC-2)(mVDAC2)(Voltage-dependent anion-selective channel protein 6)(VDAC-6)(mVDAC6)(Outer mitochondrial membrane protein porin 2) [Source:UniProtKB/Swiss-Prot;Acc:Q60930]
18041		ENSMUSG00000027618	18041 100045796	Nfs1	Cysteine desulfurase, mitochondrial Precursor (m-Nfs1)(EC 2.8.1.7) [Source:UniProtKB/Swiss-Prot;Acc:Q9Z1J3]
26912		ENSMUSG00000006378	26912	Gcat	2-amino-3-ketobutyrate coenzyme A ligase, mitochondrial Precursor (AKB ligase)(EC 2.3.1.29)(Glycine acetyltransferase)(Aminoacetone synthetase) [Source:UniProtKB/Swiss-Prot;Acc:O88986]
56748		ENSMUSG00000029993	56748	Nfu1	NFU1 iron-sulfur cluster scaffold homolog, mitochondrial Precursor (HIRA-interacting protein 5)(mHIRIP5) [Source:UniProtKB/Swiss-Prot;Acc:Q9QZ23]
77697		ENSMUSG00000029575	77697	Mmab	Cob(I)yrinic acid a,c-diamide adenosyltransferase, mitochondrial Precursor (EC 2.5.1.17)(Cob(I)alamin adenosyltransferase)(Methylmalonic aciduria type B homolog) [Source:UniProtKB/Swiss-Prot;Acc:Q9D273]
14874		ENSMUSG00000021033	14874	Gstz1	Maleylacetoacetate isomerase (MAAI)(EC 5.2.1.2)(Glutathione S-transferase zeta 1)(EC 2.5.1.18)(GSTZ1-1) [Source:UniProtKB/Swiss-Prot;Acc:Q9WVL0]
70556		ENSMUSG00000028982	70556	Slc25a33	Solute carrier family 25 member 33 [Source:UniProtKB/Swiss-Prot;Acc:Q3TZX3]
24071		ENSMUSG00000021139	24071 66272	Cox16	Cytochrome c oxidase assembly protein COX16 homolog, mitochondrial Precursor [Source:UniProtKB/Swiss-Prot;Acc:Q9CR63]
66272		ENSMUSG00000021139	24071 66272	Cox16	Cytochrome c oxidase assembly protein COX16 homolog, mitochondrial Precursor [Source:UniProtKB/Swiss-Prot;Acc:Q9CR63]
66132		ENSMUSG00000021023	66132	1110008L16Rik	Mitochondrial ribonuclease P protein 3 Precursor (Mitochondrial RNase P protein 3) [Source:UniProtKB/Swiss-Prot;Acc:Q8JZY4]
14571		ENSMUSG00000026827	14571	Gpd2	Glycerol-3-phosphate dehydrogenase, mitochondrial Precursor (GPDH-M)(GPD-M)(EC 1.1.5.3)(Protein TISP38) [Source:UniProtKB/Swiss-Prot;Acc:Q64521]
67900		ENSMUSG00000004748	67900	1700020C11Rik	Mitochondrial 18 kDa protein (MTP18) [Source:UniProtKB/Swiss-Prot;Acc:Q9CRB8]
50529		ENSMUSG00000046756	50529	Mrps7	28S ribosomal protein S7, mitochondrial Precursor (S7mt)(MRP-S7) [Source:UniProtKB/Swiss-Prot;Acc:Q80X85]
70355		ENSMUSG00000051043	100044349 70355	Gprc5c	G-protein coupled receptor family C group 5 member C Precursor (Retinoic acid-induced gene 3 protein)(RAIG-3) [Source:UniProtKB/Swiss-Prot;Acc:Q8K3J9]
11522		ENSMUSG00000074207	11522	Adh1	Alcohol dehydrogenase 1 (EC 1.1.1.1)(Alcohol dehydrogenase A subunit)(ADH-A2) [Source:UniProtKB/Swiss-Prot;Acc:P00329]
66973		ENSMUSG00000024436	66973	Mrps18b	28S ribosomal protein S18b, mitochondrial Precursor (MRP-S18-b)(Mrps18b)(MRP-S18-2) [Source:UniProtKB/Swiss-Prot;Acc:Q99N84]
21823		ENSMUSG00000000214	21823	Th	Tyrosine 3-monooxygenase (EC 1.14.16.2)(Tyrosine 3-hydroxylase)(TH) [Source:UniProtKB/Swiss-Prot;Acc:P24529]
12856		ENSMUSG00000046516	12856	Cox17	Cytochrome c oxidase copper chaperone [Source:UniProtKB/Swiss-Prot;Acc:P56394]
17991		ENSMUSG00000014294	17991	Ndufa2	NADH dehydrogenase [ubiquinone] 1 alpha subcomplex subunit 2 (NADH-ubiquinone oxidoreductase B8 subunit)(Complex I-B8)(CI-B8) [Source:UniProtKB/Swiss-Prot;Acc:Q9CQ75]
68165		ENSMUSG00000079677	68165	Fdx1l	Adrenodoxin-like protein, mitochondrial Precursor (Ferredoxin-1-like protein) [Source:UniProtKB/Swiss-Prot;Acc:Q9CPW2]
64658		ENSMUSG00000014551	64658	Mrps25	28S ribosomal protein S25, mitochondrial (S25mt)(MRP-S25) [Source:UniProtKB/Swiss-Prot;Acc:Q9D125]
12215		ENSMUSG00000023175	12215	Bsg	Basigin Precursor (Basic immunoglobulin superfamily)(Membrane glycoprotein gp42)(HT7 antigen)(CD147 antigen) [Source:UniProtKB/Swiss-Prot;Acc:P18572]
11676		ENSMUSG00000017390	11676	Aldoc	Fructose-bisphosphate aldolase C (EC 4.1.2.13)(Brain-type aldolase)(Aldolase 3)(Zebrin II)(Scrapie-responsive protein 2) [Source:UniProtKB/Swiss-Prot;Acc:P05063]
56412		ENSMUSG00000036285	56412	2610024G14Rik	Uncharacterized protein C4orf14 homolog [Source:UniProtKB/Swiss-Prot;Acc:Q9JJG9]
28028		ENSMUSG00000044018	28028	Mrpl50	39S ribosomal protein L50, mitochondrial (L50mt)(MRP-L50) [Source:UniProtKB/Swiss-Prot;Acc:Q8VDT9]
11639		ENSMUSG00000028527	11639 635960	Ak3l1	Adenylate kinase isoenzyme 4, mitochondrial (EC 2.7.4.3)(Adenylate kinase 3-like)(ATP-AMP transphosphorylase) [Source:UniProtKB/Swiss-Prot;Acc:Q9WUR9]
17993		ENSMUSG00000021764	17993	Ndufs4	NADH dehydrogenase [ubiquinone] iron-sulfur protein 4, mitochondrial Precursor (NADH-ubiquinone oxidoreductase 18 kDa subunit)(Complex I-18 kDa)(CI-18 kDa)(Complex I-AQDQ)(CI-AQDQ) [Source:UniProtKB/Swiss-Prot;Acc:Q9CXZ1]
11958		ENSMUSG00000050856	11958	Atp5k	ATP synthase subunit e, mitochondrial [Source:UniProtKB/Swiss-Prot;Acc:Q06185]
68342		ENSMUSG00000040048	68342	Ndufb10	NADH dehydrogenase [ubiquinone] 1 beta subcomplex subunit 10 (NADH-ubiquinone oxidoreductase PDSW subunit)(Complex I-PDSW)(CI-PDSW) [Source:UniProtKB/Swiss-Prot;Acc:Q9DCS9]
12892		ENSMUSG00000022742	12892	Cpox	Coproporphyrinogen-III oxidase, mitochondrial Precursor (Coproporphyrinogenase)(Coprogen oxidase)(COX)(EC 1.3.3.3) [Source:UniProtKB/Swiss-Prot;Acc:P36552]
23897		ENSMUSG00000027944	20461 23897	Hax1	HCLS1-associated protein X-1 (HS1-associating protein X-1)(HAX-1)(HS1-binding protein 1) [Source:UniProtKB/Swiss-Prot;Acc:O35387]
69029		ENSMUSG00000022452	69029	1500032L24Rik	UPF0466 protein C22orf32 homolog, mitochondrial Precursor [Source:UniProtKB/Swiss-Prot;Acc:Q9DB10]
56189		ENSMUSG00000036892	56189	Prodh2	Probable proline dehydrogenase 2 (EC 1.5.99.8)(Probable proline oxidase 2)(Kidney and liver proline oxidase 1)(MmPOX1)(Proline oxidase-like protein)(Proline oxidase)(PO) [Source:UniProtKB/Swiss-Prot;Acc:Q8VCZ9]
66706		ENSMUSG00000070283	66706	4733401H18Rik	Uncharacterized protein C3orf60 homolog (Protein 2P1) [Source:UniProtKB/Swiss-Prot;Acc:Q9JKL4]
59054		ENSMUSG00000021731	59054	Mrps30	28S ribosomal protein S30, mitochondrial (S30mt)(MRP-S30) [Source:UniProtKB/Swiss-Prot;Acc:Q9D0G0]
94061		ENSMUSG00000029486	94061	Mrpl1	39S ribosomal protein L1, mitochondrial Precursor (L1mt)(MRP-L1) [Source:UniProtKB/Swiss-Prot;Acc:Q99N96]
20523		ENSMUSG00000031105	20523	Slc25a14	Brain mitochondrial carrier protein 1 (BMCP-1)(Mitochondrial uncoupling protein 5)(UCP 5)(Solute carrier family 25 member 14) [Source:UniProtKB/Swiss-Prot;Acc:Q9Z2B2]
246221		ENSMUSG00000071711	246221	Mpst	3-mercaptopyruvate sulfurtransferase (MST)(EC 2.8.1.2) [Source:UniProtKB/Swiss-Prot;Acc:Q99J99]
20916		ENSMUSG00000022110	20916	Sucla2	Succinyl-CoA ligase [ADP-forming] subunit beta, mitochondrial Precursor (EC 6.2.1.5)(ATP-specific succinyl-CoA synthetase subunit beta)(Succinyl-CoA synthetase beta-A chain)(SCS-betaA) [Source:UniProtKB/Swiss-Prot;Acc:Q9Z2I9]
74776		ENSMUSG00000028013	74776	Ppa2	Inorganic pyrophosphatase 2, mitochondrial Precursor (PPase 2)(EC 3.6.1.1) [Source:UniProtKB/Swiss-Prot;Acc:Q91VM9]
94065		ENSMUSG00000034880	94065	Mrpl34	39S ribosomal protein L34, mitochondrial Precursor (L34mt)(MRP-L34) [Source:UniProtKB/Swiss-Prot;Acc:Q99N91]
100047429		ENSMUSG00000022956	28080 100047429	Atp5o	ATP synthase subunit O, mitochondrial Precursor (Oligomycin sensitivity conferral protein)(OSCP) [Source:UniProtKB/Swiss-Prot;Acc:Q9DB20]
66047		ENSMUSG00000034932	66047	Mrpl54	39S ribosomal protein L54, mitochondrial Precursor (L54mt)(MRP-L54) [Source:UniProtKB/Swiss-Prot;Acc:Q9CPW3]
12034		ENSMUSG00000004264	12034	Phb2	Prohibitin-2 (B-cell receptor-associated protein BAP37)(Repressor of estrogen receptor activity) [Source:UniProtKB/Swiss-Prot;Acc:O35129]
67681		ENSMUSG00000057388	67681	Mrpl18	39S ribosomal protein L18, mitochondrial Precursor (L18mt)(MRP-L18) [Source:UniProtKB/Swiss-Prot;Acc:Q9CQL5]
66948		ENSMUSG00000031969	66948	Acad8	Isobutyryl-CoA dehydrogenase, mitochondrial Precursor (EC 1.3.99.-)(Acyl-CoA dehydrogenase family member 8)(ACAD-8) [Source:UniProtKB/Swiss-Prot;Acc:Q9D7B6]
12041		ENSMUSG00000030802	12041	Bckdk	[3-methyl-2-oxobutanoate dehydrogenase [lipoamide]] kinase, mitochondrial Precursor (EC 2.7.11.4)(Branched-chain alpha-ketoacid dehydrogenase kinase)(BCKD-kinase)(BCKDHKIN) [Source:UniProtKB/Swiss-Prot;Acc:O55028]
69487		ENSMUSG00000027384	69487	2310003L22Rik	Probable methyltransferase C20orf7 homolog, mitochondrial Precursor (EC 2.1.1.-) [Source:UniProtKB/Swiss-Prot;Acc:A2APY7]
68537		ENSMUSG00000022370	68537	Mrpl13	39S ribosomal protein L13, mitochondrial (L13mt)(MRP-L13) [Source:UniProtKB/Swiss-Prot;Acc:Q9D1P0]
66559		ENSMUSG00000041921	66559	Metapl1	Methionine aminopeptidase 1D, mitochondrial Precursor (EC 3.4.11.18) [Source:UniProtKB/Swiss-Prot;Acc:Q9CPW9]
22276		ENSMUSG00000030979	22276	Uros	Uroporphyrinogen-III synthase (UROIIIS)(UROS)(EC 4.2.1.75)(Hydroxymethylbilane hydrolyase [cyclizing])(Uroporphyrinogen-III cosynthetase) [Source:UniProtKB/Swiss-Prot;Acc:P51163]
66925		ENSMUSG00000000171	66925	Sdhd	Succinate dehydrogenase [ubiquinone] cytochrome b small subunit, mitochondrial Precursor (CybS)(Succinate-ubiquinone reductase membrane anchor subunit)(QPs3)(CII-4)(Succinate dehydrogenase complex subunit D)(Succinate-ubiquinone oxidoreductase cytochrome b small subunit) [Source:UniProtKB/Swiss-Prot;Acc:Q9CXV1]
20917		ENSMUSG00000061838	20917	Suclg2	Succinyl-CoA ligase [GDP-forming] subunit beta, mitochondrial Precursor (EC 6.2.1.4)(GTP-specific succinyl-CoA synthetase subunit beta)(Succinyl-CoA synthetase beta-G chain)(SCS-betaG) [Source:UniProtKB/Swiss-Prot;Acc:Q9Z2I8]
11757		ENSMUSG00000024997	11757	Prdx3	Thioredoxin-dependent peroxide reductase, mitochondrial Precursor (EC 1.11.1.15)(Perioredoxin-3)(PRX III)(Antioxidant protein 1)(AOP-1)(Protein MER5) [Source:UniProtKB/Swiss-Prot;Acc:P20108]
66845		ENSMUSG00000029142	66845	Mrpl33	39S ribosomal protein L33, mitochondrial (L33mt)(MRP-L33) [Source:UniProtKB/Swiss-Prot;Acc:Q9CQP0]
30059		ENSMUSG00000027076	30059	Timm10	Mitochondrial import inner membrane translocase subunit Tim10 [Source:UniProtKB/Swiss-Prot;Acc:P62073]
21856		ENSMUSG00000002949	21856	Timm44	Mitochondrial import inner membrane translocase subunit TIM44 Precursor [Source:UniProtKB/Swiss-Prot;Acc:O35857]
270076		ENSMUSG00000003809	270076	Gcdh	Glutaryl-CoA dehydrogenase, mitochondrial Precursor (GCD)(EC 1.3.99.7) [Source:UniProtKB/Swiss-Prot;Acc:Q60759]
53333		ENSMUSG00000002984	53333	Tomm40	Mitochondrial import receptor subunit TOM40 homolog (Translocase of outer membrane 40 kDa subunit homolog)(Mitochondrial outer membrane protein of 35 kDa)(MOM35)(Protein Haymaker) [Source:UniProtKB/Swiss-Prot;Acc:Q9QYA2]
19935		ENSMUSG00000075279	100040519 100046620 19935	RP23-313J15.3	39S ribosomal protein L23, mitochondrial (L23mt)(MRP-L23)(L23 mitochondrial-related protein) [Source:UniProtKB/Swiss-Prot;Acc:O35972]
17210		ENSMUSG00000038612	17210	Mcl1	Induced myeloid leukemia cell differentiation protein Mcl-1 homolog (Bcl-2-related protein EAT/mcl1) [Source:UniProtKB/Swiss-Prot;Acc:P97287]
28185		ENSMUSG00000022752	28185	Tomm70a	Mitochondrial import receptor subunit TOM70 (Translocase of outer membrane 70 kDa subunit)(Mitochondrial precursor proteins import receptor) [Source:UniProtKB/Swiss-Prot;Acc:Q9CZW5]
17714		ENSMUSG00000024580	17714	Grpel2	GrpE protein homolog 2, mitochondrial Precursor (Mt-GrpE#2) [Source:UniProtKB/Swiss-Prot;Acc:O88396]
76916		ENSMUSG00000002846	76916	4930455C21Rik	Transmembrane protein C3orf1 homolog [Source:UniProtKB/Swiss-Prot;Acc:Q8BUY5]
57423		ENSMUSG00000038690	57423	Atp5j2	ATP synthase subunit f, mitochondrial [Source:UniProtKB/Swiss-Prot;Acc:P56135]
216151		ENSMUSG00000020329	216151	Polrmt	DNA-directed RNA polymerase, mitochondrial Precursor (EC 2.7.7.6)(MtRPOL) [Source:UniProtKB/Swiss-Prot;Acc:Q8BKF1]
21817		ENSMUSG00000037820	21817	Tgm2	Protein-glutamine gamma-glutamyltransferase 2 (EC 2.3.2.13)(Tissue transglutaminase)(TGase C)(TGC)(TG(C))(Transglutaminase-2) [Source:UniProtKB/Swiss-Prot;Acc:P21981]
64058		ENSMUSG00000019851	64058	Perp	p53 apoptosis effector related to PMP-22 (Keratinocyte-associated protein 1)(KCP-1) [Source:UniProtKB/Swiss-Prot;Acc:Q9JK95]
30055		ENSMUSG00000020219	30055	Timm13	Mitochondrial import inner membrane translocase subunit Tim13 [Source:UniProtKB/Swiss-Prot;Acc:P62075]
212442		ENSMUSG00000025937	212442	Lactb2	Beta-lactamase-like protein 2 (EC 3.-.-.-) [Source:UniProtKB/Swiss-Prot;Acc:Q99KR3]
cellular component----cytosol----GO:0005829
C=534;O=169;E=121.65;R=1.39;rawP=7.44e-07;adjP=1.75e-05
11652		ENSMUSG00000004056	11652 100048123	Akt2	RAC-beta serine/threonine-protein kinase (EC 2.7.11.1)(RAC-PK-beta)(Protein kinase Akt-2)(Protein kinase B, beta)(PKB beta) [Source:UniProtKB/Swiss-Prot;Acc:Q60823]
22230		ENSMUSG00000005262	22230	Ufd1l	Ubiquitin fusion degradation protein 1 homolog (UB fusion protein 1) [Source:UniProtKB/Swiss-Prot;Acc:P70362]
19051		ENSMUSG00000002930	19051	Gsbs	G substrate [Source:RefSeq peptide;Acc:NP_035283]
14084		ENSMUSG00000010517	14084	Faf1	FAS-associated factor 1 [Source:UniProtKB/Swiss-Prot;Acc:P54731]
76846		ENSMUSG00000006333	76846	Rps9	40S ribosomal protein S9 [Source:UniProtKB/Swiss-Prot;Acc:Q6ZWN5]
20103		ENSMUSG00000012848	20103	Rps5	40S ribosomal protein S5 [Contains 40S ribosomal protein S5, N-terminally processed] [Source:UniProtKB/Swiss-Prot;Acc:P97461]
19359		ENSMUSG00000028426	19359	Rad23b	UV excision repair protein RAD23 homolog B (mHR23B)(XP-C repair-complementing complex 58 kDa protein)(p58) [Source:UniProtKB/Swiss-Prot;Acc:P54728]
12017		ENSMUSG00000028416	12017	Bag1	BAG family molecular chaperone regulator 1 (BAG-1)(Bcl-2-associated athanogene 1) [Source:UniProtKB/Swiss-Prot;Acc:Q60739]
12343		ENSMUSG00000015733	12343	Capza2	F-actin-capping protein subunit alpha-2 (CapZ alpha-2) [Source:UniProtKB/Swiss-Prot;Acc:P47754]
22215		ENSMUSG00000025326	22215	Ube3a	Ubiquitin-protein ligase E3A (EC 6.3.2.-)(Oncogenic protein-associated protein E6-AP) [Source:UniProtKB/Swiss-Prot;Acc:O08759]
20402		ENSMUSG00000027288	20402	Zfp106	Zinc finger protein 106 (Zfp-106)(Zinc finger protein 474)(H3a minor histocompatibility antigen)(Son of insulin receptor mutant) [Source:UniProtKB/Swiss-Prot;Acc:O88466]
68652		ENSMUSG00000015755	68652	Map3k7ip2	Mitogen-activated protein kinase kinase kinase 7-interacting protein 2 (TAK1-binding protein 2)(TAB2) [Source:UniProtKB/Swiss-Prot;Acc:Q99K90]
73689		ENSMUSG00000057506	625631 73689	AC125101.3-1	Biogenesis of lysosome-related organelles complex 1 subunit 2 (BLOC subunit 2) [Source:UniProtKB/Swiss-Prot;Acc:Q9CWG9]
12361		ENSMUSG00000031012	12361	Cask	Peripheral plasma membrane protein CASK (EC 2.7.11.1)(Calcium/calmodulin-dependent serine protein kinase) [Source:UniProtKB/Swiss-Prot;Acc:O70589]
108077		ENSMUSG00000040356	108077	Skiv2l	superkiller viralicidic activity 2-like [Source:RefSeq peptide;Acc:NP_067312]
74055		ENSMUSG00000024998	74055	Plce1	1-phosphatidylinositol-4,5-bisphosphate phosphodiesterase epsilon-1 (EC 3.1.4.11)(Phospholipase C-epsilon-1)(PLC-epsilon-1)(Phosphoinositide-specific phospholipase C epsilon-1) [Source:UniProtKB/Swiss-Prot;Acc:Q8K4S1]
14751		ENSMUSG00000036427	14751	Gpi1	Glucose-6-phosphate isomerase (GPI)(EC 5.3.1.9)(Phosphoglucose isomerase)(PGI)(Phosphohexose isomerase)(PHI)(Autocrine motility factor)(AMF)(Neuroleukin)(NLK) [Source:UniProtKB/Swiss-Prot;Acc:P06745]
16452		ENSMUSG00000024789	16452	Jak2	Tyrosine-protein kinase JAK2 (EC 2.7.10.2)(Janus kinase 2)(JAK-2) [Source:UniProtKB/Swiss-Prot;Acc:Q62120]
19185		ENSMUSG00000005625	19185	Psmd4	26S proteasome non-ATPase regulatory subunit 4 (26S proteasome regulatory subunit S5A)(Rpn10)(Multiubiquitin chain-binding protein) [Source:UniProtKB/Swiss-Prot;Acc:O35226]
12050		ENSMUSG00000022194	12050	Bcl2l2	Bcl-2-like protein 2 (Bcl2-L-2)(Apoptosis regulator Bcl-W)(c98) [Source:UniProtKB/Swiss-Prot;Acc:P70345]
15930		ENSMUSG00000031551	15930	Ido1	Indoleamine 2,3-dioxygenase (IDO)(EC 1.13.11.52)(Indoleamine-pyrrole 2,3-dioxygenase) [Source:UniProtKB/Swiss-Prot;Acc:P28776]
20655		ENSMUSG00000022982	545845 20655 667310	Sod1	Superoxide dismutase [Cu-Zn] (EC 1.15.1.1) [Source:UniProtKB/Swiss-Prot;Acc:P08228]
54366		ENSMUSG00000038816	54366	Ctnnal1	Alpha-catulin (Catenin alpha-like protein 1)(Alpha-catenin-related protein)(ACRP) [Source:UniProtKB/Swiss-Prot;Acc:O88327]
22436		ENSMUSG00000024066	22436	Xdh	Xanthine dehydrogenase/oxidase [Includes Xanthine dehydrogenase(XD)(EC 1.17.1.4);Xanthine oxidase(XO)(EC 1.17.3.2)(Xanthine oxidoreductase)] [Source:UniProtKB/Swiss-Prot;Acc:Q00519]
66997		ENSMUSG00000020720	66997	Psmd12	26S proteasome non-ATPase regulatory subunit 12 (26S proteasome regulatory subunit p55) [Source:UniProtKB/Swiss-Prot;Acc:Q9D8W5]
22241		ENSMUSG00000029512	22241	Ulk1	Serine/threonine-protein kinase ULK1 (EC 2.7.11.1)(Unc-51-like kinase 1)(Serine/threonine-protein kinase Unc51.1) [Source:UniProtKB/Swiss-Prot;Acc:O70405]
22017		ENSMUSG00000021376	22017	Tpmt	Thiopurine S-methyltransferase (EC 2.1.1.67)(Thiopurine methyltransferase) [Source:UniProtKB/Swiss-Prot;Acc:O55060]
54611		ENSMUSG00000041741	54611	Pde3a	cGMP-inhibited 3',5'-cyclic phosphodiesterase A (EC 3.1.4.17)(Cyclic GMP-inhibited phosphodiesterase A)(CGI-PDE A) [Source:UniProtKB/Swiss-Prot;Acc:Q9Z0X4]
14533		ENSMUSG00000025349	666114 632624 14533	Bloc1s1	Biogenesis of lysosome-related organelles complex 1 subunit 1 (BLOC-1 subunit 1)(GCN5-like protein 1) [Source:UniProtKB/Swiss-Prot;Acc:O55102]
19182		ENSMUSG00000002102	19182	Psmc3	26S protease regulatory subunit 6A (Proteasome 26S subunit ATPase 3)(TAT-binding protein 1)(TBP-1) [Source:UniProtKB/Swiss-Prot;Acc:O88685]
19179		ENSMUSG00000021178	19179	Psmc1	26S protease regulatory subunit 4 (P26s4)(Proteasome 26S subunit ATPase 1) [Source:UniProtKB/Swiss-Prot;Acc:P62192]
433217		ENSMUSG00000025825	433217 66383	Iscu	Iron-sulfur cluster assembly enzyme ISCU, mitochondrial Precursor (NifU-like N-terminal domain-containing protein)(NifU-like protein) [Source:UniProtKB/Swiss-Prot;Acc:Q9D7P6]
18260		ENSMUSG00000021638	18260	Ocln	Occludin [Source:UniProtKB/Swiss-Prot;Acc:Q61146]
100044170		ENSMUSG00000021615	100044170 108138	Xrcc4	DNA repair protein XRCC4 (X-ray repair cross-complementing protein 4) [Source:UniProtKB/Swiss-Prot;Acc:Q924T3]
16413		ENSMUSG00000062352	16413	Itgb1bp1	Integrin beta-1-binding protein 1 (Bodenin) [Source:UniProtKB/Swiss-Prot;Acc:O35671]
20422		ENSMUSG00000042541	20422	Shfm1	26S proteasome complex subunit DSS1 (Split hand/foot malformation type 1 protein homolog)(Deleted in split hand/split foot protein 1 homolog)(Split hand/foot deleted protein 1 homolog) [Source:UniProtKB/Swiss-Prot;Acc:P60897]
19170		ENSMUSG00000014769	19170	Psmb1	Proteasome subunit beta type-1 Precursor (EC 3.4.25.1)(Proteasome component C5)(Macropain subunit C5)(Multicatalytic endopeptidase complex subunit C5)(Proteasome gamma chain) [Source:UniProtKB/Swiss-Prot;Acc:O09061]
19175		ENSMUSG00000018286	100048803 19175	Psmb6	Proteasome subunit beta type-6 Precursor (EC 3.4.25.1)(Proteasome delta chain)(Macropain delta chain)(Multicatalytic endopeptidase complex delta chain)(Proteasome subunit Y) [Source:UniProtKB/Swiss-Prot;Acc:Q60692]
53413		ENSMUSG00000020792	53413	Exoc7	Exocyst complex component 7 (Exocyst complex component Exo70) [Source:UniProtKB/Swiss-Prot;Acc:O35250]
16337		ENSMUSG00000005534	16337	Insr	Insulin receptor Precursor (IR)(EC 2.7.10.1)(CD220 antigen) [Contains Insulin receptor subunit alpha;Insulin receptor subunit beta] [Source:UniProtKB/Swiss-Prot;Acc:P15208]
71835		ENSMUSG00000062190	71835	Lancl2	LanC-like protein 2 (Testis-specific adriamycin sensitivity protein) [Source:UniProtKB/Swiss-Prot;Acc:Q9JJK2]
22059		ENSMUSG00000059552	22059	Trp53	Cellular tumor antigen p53 (Tumor suppressor p53) [Source:UniProtKB/Swiss-Prot;Acc:P02340]
21991		ENSMUSG00000023456	21991	Tpi1	Triosephosphate isomerase (TIM)(EC 5.3.1.1)(Triose-phosphate isomerase) [Source:UniProtKB/Swiss-Prot;Acc:P17751]
12043		ENSMUSG00000057329	12043	Bcl2	Apoptosis regulator Bcl-2 [Source:UniProtKB/Swiss-Prot;Acc:P10417]
76650		ENSMUSG00000032802	76650	Srxn1	Sulfiredoxin-1 (EC 1.8.98.2)(Neoplastic progression protein 3) [Source:UniProtKB/Swiss-Prot;Acc:Q9D975]
23996		ENSMUSG00000030603	23996	Psmc4	26S protease regulatory subunit 6B (Proteasome 26S subunit ATPase 4)(MB67-interacting protein)(MIP224)(TAT-binding protein 7)(TBP-7)(CIP21) [Source:UniProtKB/Swiss-Prot;Acc:P54775]
18707		ENSMUSG00000039936	18707	Pik3cd	Phosphatidylinositol-4,5-bisphosphate 3-kinase catalytic subunit delta isoform (EC 2.7.1.153)(PI3-kinase p110 subunit delta)(PtdIns-3-kinase p110)(PI3K)(p110delta) [Source:UniProtKB/Swiss-Prot;Acc:O35904]
14976		ENSMUSG00000024309	14976	H2-Ke2	Prefoldin subunit 6 (Protein Ke2) [Source:UniProtKB/Swiss-Prot;Acc:Q03958]
68365		ENSMUSG00000026878	68365	Rab14	Ras-related protein Rab-14 [Source:UniProtKB/Swiss-Prot;Acc:Q91V41]
12462		ENSMUSG00000001416	12462	Cct3	T-complex protein 1 subunit gamma (TCP-1-gamma)(CCT-gamma)(Matricin)(mTRiC-P5) [Source:UniProtKB/Swiss-Prot;Acc:P80318]
22321		ENSMUSG00000007029	22321	Vars	Valyl-tRNA synthetase (EC 6.1.1.9)(Valine--tRNA ligase)(ValRS)(Protein G7a) [Source:UniProtKB/Swiss-Prot;Acc:Q9Z1Q9]
54683		ENSMUSG00000024953	54683	Prdx5	Peroxiredoxin-5, mitochondrial Precursor (EC 1.11.1.15)(Prx-V)(Peroxisomal antioxidant enzyme)(PLP)(Thioredoxin reductase)(Thioredoxin peroxidase PMP20)(Antioxidant enzyme B166)(AOEB166)(Liver tissue 2D-page spot 2D-0014IV) [Source:UniProtKB/Swiss-Prot;Acc:P99029]
20526		ENSMUSG00000027690	20526	Slc2a2	Solute carrier family 2, facilitated glucose transporter member 2 (Glucose transporter type 2, liver)(GLUT-2) [Source:UniProtKB/Swiss-Prot;Acc:P14246]
68953		ENSMUSG00000033916	68953	Chmp2a	Charged multivesicular body protein 2a (Chromatin-modifying protein 2a)(CHMP2a)(Vacuolar protein-sorting-associated protein 2)(mVps2) [Source:UniProtKB/Swiss-Prot;Acc:Q9DB34]
13808		ENSMUSG00000060600	13808	Eno3	Beta-enolase (EC 4.2.1.11)(2-phospho-D-glycerate hydro-lyase)(Muscle-specific enolase)(MSE)(Skeletal muscle enolase)(Enolase 3) [Source:UniProtKB/Swiss-Prot;Acc:P21550]
17101		ENSMUSG00000019726	17101	Lyst	Lysosomal-trafficking regulator (Beige protein)(CHS1 homolog) [Source:UniProtKB/Swiss-Prot;Acc:P97412]
11687		ENSMUSG00000018924	11687	Alox15	Arachidonate 12-lipoxygenase, leukocyte-type (12-LOX)(EC 1.13.11.31) [Source:UniProtKB/Swiss-Prot;Acc:P39654]
12468		ENSMUSG00000030007	12468	Cct7	T-complex protein 1 subunit eta (TCP-1-eta)(CCT-eta) [Source:UniProtKB/Swiss-Prot;Acc:P80313]
18036		ENSMUSG00000030595	18036	Nfkbib	NF-kappa-B inhibitor beta (NF-kappa-BIB)(I-kappa-B-beta)(IkappaBbeta)(IkB-beta)(IkB-B) [Source:UniProtKB/Swiss-Prot;Acc:Q60778]
18039		ENSMUSG00000022055	18039	Nefl	Neurofilament light polypeptide (NF-L)(Neurofilament triplet L protein)(68 kDa neurofilament protein) [Source:UniProtKB/Swiss-Prot;Acc:P08551]
56612		ENSMUSG00000001289	56612	Pfdn5	Prefoldin subunit 5 (C-myc-binding protein Mm-1)(Myc modulator 1)(EIG-1) [Source:UniProtKB/Swiss-Prot;Acc:Q9WU28]
269378		ENSMUSG00000027597	269378 677344	Ahcy	Adenosylhomocysteinase (AdoHcyase)(EC 3.3.1.1)(S-adenosyl-L-homocysteine hydrolase)(Liver copper-binding protein)(CUBP) [Source:UniProtKB/Swiss-Prot;Acc:P50247]
16204		ENSMUSG00000020405	16204	Fabp6	Gastrotropin (GT)(Fatty acid-binding protein 6)(Ileal lipid-binding protein)(ILBP) [Source:UniProtKB/Swiss-Prot;Acc:P51162]
22222		ENSMUSG00000027272	22222	Ubr1	E3 ubiquitin-protein ligase UBR1 (EC 6.3.2.-)(N-recognin-1)(Ubiquitin-protein ligase E3-alpha-1)(Ubiquitin-protein ligase E3-alpha-I) [Source:UniProtKB/Swiss-Prot;Acc:O70481]
65971		ENSMUSG00000020096	65971	1700021K02Rik	Protein SPATIAL (Stromal protein associated with thymii and lymph node) [Source:UniProtKB/Swiss-Prot;Acc:Q7TSD4]
14793		ENSMUSG00000023505	14793	Cdca3	Cell division cycle-associated protein 3 (Trigger of mitotic entry protein 1)(TOME-1)(Gene-rich cluster protein C8) [Source:UniProtKB/Swiss-Prot;Acc:Q99M54]
26441		ENSMUSG00000032301	26441	Psma4	Proteasome subunit alpha type-4 (EC 3.4.25.1)(Proteasome component C9)(Macropain subunit C9)(Multicatalytic endopeptidase complex subunit C9)(Proteasome subunit L) [Source:UniProtKB/Swiss-Prot;Acc:Q9R1P0]
100046223		ENSMUSG00000063457	20054 100046223 633683	Rps15	40S ribosomal protein S15 (RIG protein) [Source:UniProtKB/Swiss-Prot;Acc:P62843]
13063		ENSMUSG00000063694	672195 100045925 670717 13063	Cycs	Cytochrome c, somatic [Source:UniProtKB/Swiss-Prot;Acc:P62897]
12387		ENSMUSG00000006932	12387	Ctnnb1	Catenin beta-1 (Beta-catenin) [Source:UniProtKB/Swiss-Prot;Acc:Q02248]
56637		ENSMUSG00000022812	56637	Gsk3b	Glycogen synthase kinase-3 beta (GSK-3 beta)(EC 2.7.11.26) [Source:UniProtKB/Swiss-Prot;Acc:Q9WV60]
26416		ENSMUSG00000053436	26416	Mapk14	Mitogen-activated protein kinase 14 (EC 2.7.11.24)(Mitogen-activated protein kinase p38 alpha)(MAP kinase p38 alpha)(CRK1) [Source:UniProtKB/Swiss-Prot;Acc:P47811]
14782		ENSMUSG00000031584	630729 14782	Gsr	Glutathione reductase, mitochondrial Precursor (GRase)(GR)(EC 1.8.1.7) [Source:UniProtKB/Swiss-Prot;Acc:P47791]
26444		ENSMUSG00000027566	26444	Psma7	Proteasome subunit alpha type-7 (EC 3.4.25.1)(Proteasome subunit RC6-1) [Source:UniProtKB/Swiss-Prot;Acc:Q9Z2U0]
56376		ENSMUSG00000028273	56376	Pdlim5	PDZ and LIM domain protein 5 (Enigma homolog)(Enigma-like PDZ and LIM domains protein) [Source:UniProtKB/Swiss-Prot;Acc:Q8CI51]
57320		ENSMUSG00000028964	57320	Park7	Protein DJ-1 (Parkinson disease protein 7 homolog) [Source:UniProtKB/Swiss-Prot;Acc:Q99LX0]
12729		ENSMUSG00000025439	12729	Clns1a	Methylosome subunit pICln (Chloride conductance regulatory protein ICln)(I(Cln))(Chloride channel, nucleotide sensitive 1A)(Chloride ion current inducer protein)(ClCI) [Source:UniProtKB/Swiss-Prot;Acc:Q61189]
16480		ENSMUSG00000001552	16480	Jup	Junction plakoglobin (Desmoplakin-3)(Desmoplakin III) [Source:UniProtKB/Swiss-Prot;Acc:Q02257]
19017		ENSMUSG00000029167	19017	Ppargc1a	Peroxisome proliferator-activated receptor gamma coactivator 1-alpha (PPAR-gamma coactivator 1-alpha)(PPARGC-1-alpha)(PGC-1-alpha) [Source:UniProtKB/Swiss-Prot;Acc:O70343]
56012		ENSMUSG00000020475	56012	Pgam2	Phosphoglycerate mutase 2 (EC 5.4.2.1)(EC 5.4.2.4)(EC 3.1.3.13)(BPG-dependent PGAM 2)(Muscle-specific phosphoglycerate mutase)(Phosphoglycerate mutase isozyme M)(PGAM-M) [Source:UniProtKB/Swiss-Prot;Acc:O70250]
19167		ENSMUSG00000060073	19167	Psma3	Proteasome subunit alpha type-3 (EC 3.4.25.1)(Proteasome component C8)(Macropain subunit C8)(Multicatalytic endopeptidase complex subunit C8)(Proteasome subunit K) [Source:UniProtKB/Swiss-Prot;Acc:O70435]
15199		ENSMUSG00000042770	15199	Hebp1	Heme-binding protein 1 (p22HBP) [Source:UniProtKB/Swiss-Prot;Acc:Q9R257]
22141		ENSMUSG00000031028	22141	Tub	Tubby protein [Source:UniProtKB/Swiss-Prot;Acc:P50586]
384783		ENSMUSG00000038894	384783	Irs2	Insulin receptor substrate 2 (IRS-2)(4PS) [Source:UniProtKB/Swiss-Prot;Acc:P81122]
56690		ENSMUSG00000074064	56690	Mlycd	Malonyl-CoA decarboxylase, mitochondrial Precursor (MCD)(EC 4.1.1.9) [Source:UniProtKB/Swiss-Prot;Acc:Q99J39]
56470		ENSMUSG00000002458	100047944 56470	Rgs19	Regulator of G-protein signaling 19 (RGS19) [Source:UniProtKB/Swiss-Prot;Acc:Q9CX84]
108058		ENSMUSG00000053819	108058	Camk2d	Calcium/calmodulin-dependent protein kinase type II delta chain (CaM-kinase II delta chain)(CaM kinase II subunit delta)(CaMK-II subunit delta)(EC 2.7.11.17) [Source:UniProtKB/Swiss-Prot;Acc:Q6PHZ2]
66914		ENSMUSG00000062381	66914	Vps28	Vacuolar protein sorting-associated protein 28 homolog (ESCRT-I complex subunit VPS28)(Caspase-activated DNase inhibitor that interacts with ASK1)(CIIA) [Source:UniProtKB/Swiss-Prot;Acc:Q9D1C8]
14629		ENSMUSG00000032350	14629	Gclc	Glutamate--cysteine ligase catalytic subunit (EC 6.3.2.2)(Gamma-glutamylcysteine synthetase)(Gamma-ECS)(GCS heavy chain) [Source:UniProtKB/Swiss-Prot;Acc:P97494]
11670		ENSMUSG00000019102	11670	Aldh3a1	Aldehyde dehydrogenase, dimeric NADP-preferring (EC 1.2.1.5)(Aldehyde dehydrogenase family 3 member A1)(Aldehyde dehydrogenase 4)(Dioxin-inducible aldehyde dehydrogenase 3) [Source:UniProtKB/Swiss-Prot;Acc:P47739]
26442		ENSMUSG00000068749	26442	Psma5	Proteasome subunit alpha type-5 (EC 3.4.25.1)(Proteasome zeta chain)(Macropain zeta chain)(Multicatalytic endopeptidase complex zeta chain) [Source:UniProtKB/Swiss-Prot;Acc:Q9Z2U1]
19062		ENSMUSG00000006127	19062	Inpp5k	Inositol polyphosphate 5-phosphatase K (EC 3.1.3.56)(Skeletal muscle and kidney-enriched inositol phosphatase) [Source:UniProtKB/Swiss-Prot;Acc:Q8C5L6]
19055		ENSMUSG00000028161	19055	Ppp3ca	Serine/threonine-protein phosphatase 2B catalytic subunit alpha isoform (EC 3.1.3.16)(Calmodulin-dependent calcineurin A subunit alpha isoform)(CAM-PRP catalytic subunit) [Source:UniProtKB/Swiss-Prot;Acc:P63328]
56436		ENSMUSG00000039041	100043022 100044778 56436	Adrm1	Proteasomal ubiquitin receptor ADRM1 (Adhesion-regulating molecule 1)(ARM-1)(110 kDa cell membrane glycoprotein)(Gp110)(Rpn13 homolog) [Source:UniProtKB/Swiss-Prot;Acc:Q9JKV1]
56085		ENSMUSG00000005312	56085	Ubqln1	Ubiquilin-1 (Protein linking IAP with cytoskeleton 1)(PLIC-1) [Source:UniProtKB/Swiss-Prot;Acc:Q8R317]
12576		ENSMUSG00000003031	12576	Cdkn1b	Cyclin-dependent kinase inhibitor 1B (Cyclin-dependent kinase inhibitor p27)(p27Kip1) [Source:UniProtKB/Swiss-Prot;Acc:P46414]
14623		ENSMUSG00000040055	14623	Gjb6	Gap junction beta-6 protein (Connexin-30)(Cx30) [Source:UniProtKB/Swiss-Prot;Acc:P70689]
14555		ENSMUSG00000023019	14555	Gpd1	Glycerol-3-phosphate dehydrogenase [NAD+], cytoplasmic (GPDH-C)(GPD-C)(EC 1.1.1.8) [Source:UniProtKB/Swiss-Prot;Acc:P13707]
15925		ENSMUSG00000056999	15925	Ide	Insulin-degrading enzyme (EC 3.4.24.56)(Insulin protease)(Insulinase)(Insulysin) [Source:UniProtKB/Swiss-Prot;Acc:Q9JHR7]
18826		ENSMUSG00000021998	18826	Lcp1	Plastin-2 (L-plastin)(Lymphocyte cytosolic protein 1)(LCP-1)(65 kDa macrophage protein)(pp65) [Source:UniProtKB/Swiss-Prot;Acc:Q61233]
16593		ENSMUSG00000021288	100047609 16593	Klc1	Kinesin light chain 1 (KLC 1) [Source:UniProtKB/Swiss-Prot;Acc:O88447]
14311		ENSMUSG00000030278	14311	Cidec	Cell death activator CIDE-3 (Cell death-inducing DFFA-like effector protein C)(Fat-specific protein FSP27) [Source:UniProtKB/Swiss-Prot;Acc:P56198]
22187		ENSMUSG00000019505	22187 667759	Ubb	Ubiquitin [Source:UniProtKB/Swiss-Prot;Acc:P62991]
17755		ENSMUSG00000052727	17755	Mtap1b	Microtubule-associated protein 1B (MAP-1B)(MAP1.2)(MAP1(X)) [Contains MAP1 light chain LC1] [Source:UniProtKB/Swiss-Prot;Acc:P14873]
20005		ENSMUSG00000047215	100042832 20005 433546 100048162 100042823	Rpl9	60S ribosomal protein L9 [Source:UniProtKB/Swiss-Prot;Acc:P51410]
12539		ENSMUSG00000019471	12539	Cdc37	Hsp90 co-chaperone Cdc37 (Hsp90 chaperone protein kinase-targeting subunit)(p50Cdc37) [Source:UniProtKB/Swiss-Prot;Acc:Q61081]
14962		ENSMUSG00000024371	14962	Cfb	Complement factor B Precursor (EC 3.4.21.47)(C3/C5 convertase) [Contains Complement factor B Ba fragment;Complement factor B Bb fragment] [Source:UniProtKB/Swiss-Prot;Acc:P04186]
27762		ENSMUSG00000007030	27762	D17H6S56E-3	Protein G7c Precursor [Source:UniProtKB/Swiss-Prot;Acc:Q9JHA8]
19201		ENSMUSG00000025429	19201	Pstpip2	Proline-serine-threonine phosphatase-interacting protein 2 (Macrophage actin-associated tyrosine-phosphorylated protein)(pp37) [Source:UniProtKB/Swiss-Prot;Acc:Q99M15]
66469		ENSMUSG00000029059	66469	2810405K02Rik	Uncharacterized protein C1orf93 homolog [Source:UniProtKB/Swiss-Prot;Acc:Q9DB60]
14599		ENSMUSG00000020713	14599	Gh	Somatotropin Precursor (Growth hormone) [Source:UniProtKB/Swiss-Prot;Acc:P06880]
56327		ENSMUSG00000024944	56327	Arl2	ADP-ribosylation factor-like protein 2 [Source:UniProtKB/Swiss-Prot;Acc:Q9D0J4]
67097		ENSMUSG00000052146	668457 67097	Rps10	40S ribosomal protein S10 [Source:UniProtKB/Swiss-Prot;Acc:P63325]
58810		ENSMUSG00000028692	58810	Akr1a4	Alcohol dehydrogenase [NADP+] (EC 1.1.1.2)(Aldehyde reductase)(Aldo-keto reductase family 1 member A1) [Source:UniProtKB/Swiss-Prot;Acc:Q9JII6]
20845		ENSMUSG00000031574	20845	Star	Steroidogenic acute regulatory protein, mitochondrial Precursor (StAR)(StARD1)(Luteinizing hormone-induced protein) [Source:UniProtKB/Swiss-Prot;Acc:P51557]
74019		ENSMUSG00000034292	74019	Traf3ip1	TRAF3-interacting protein 1 (Microtubule-interacting protein associated with TRAF3)(MIP-T3) [Source:UniProtKB/Swiss-Prot;Acc:Q149C2]
15893		ENSMUSG00000062995	15893	Ica1	Islet cell autoantigen 1 (69 kDa islet cell autoantigen)(ICA69)(Islet cell autoantigen p69)(ICAp69)(p69) [Source:UniProtKB/Swiss-Prot;Acc:P97411]
22213		ENSMUSG00000009293	22213	Ube2g2	Ubiquitin-conjugating enzyme E2 G2 (EC 6.3.2.19)(Ubiquitin-protein ligase G2)(Ubiquitin carrier protein G2) [Source:UniProtKB/Swiss-Prot;Acc:P60605]
70025		ENSMUSG00000028937	70025	Acot7	Cytosolic acyl coenzyme A thioester hydrolase (EC 3.1.2.2)(Long chain acyl-CoA thioester hydrolase)(Acyl-CoA thioesterase 7)(CTE-IIa)(CTE-II)(Brain acyl-CoA hydrolase) [Source:UniProtKB/Swiss-Prot;Acc:Q91V12]
74068		ENSMUSG00000010796	74068	Asz1	Ankyrin repeat, SAM and basic leucine zipper domain-containing protein 1 (Germ cell-specific ankyrin, SAM and basic leucine zipper domain-containing protein) [Source:UniProtKB/Swiss-Prot;Acc:Q8VD46]
26446		ENSMUSG00000069744	26446	Psmb3	Proteasome subunit beta type-3 (EC 3.4.25.1)(Proteasome theta chain)(Proteasome chain 13)(Proteasome component C10-II) [Source:UniProtKB/Swiss-Prot;Acc:Q9R1P1]
19172		ENSMUSG00000005779	19172	Psmb4	Proteasome subunit beta type-4 Precursor (Proteasome beta chain)(EC 3.4.25.1)(Macropain beta chain)(Multicatalytic endopeptidase complex beta chain)(Proteasome chain 3) [Source:UniProtKB/Swiss-Prot;Acc:P99026]
22123		ENSMUSG00000017221	22123	Psmd3	26S proteasome non-ATPase regulatory subunit 3 (26S proteasome regulatory subunit S3)(Proteasome subunit p58)(Transplantation antigen P91A)(Tum-P91A antigen) [Source:UniProtKB/Swiss-Prot;Acc:P14685]
66522		ENSMUSG00000056204	66522	Pgpep1	Pyroglutamyl-peptidase 1 (EC 3.4.19.3)(Pyroglutamyl-peptidase I)(PGP-I)(Pyrrolidone-carboxylate peptidase)(5-oxoprolyl-peptidase)(Pyroglutamyl aminopeptidase I)(PAP-I) [Source:UniProtKB/Swiss-Prot;Acc:Q9ESW8]
18041		ENSMUSG00000027618	18041 100045796	Nfs1	Cysteine desulfurase, mitochondrial Precursor (m-Nfs1)(EC 2.8.1.7) [Source:UniProtKB/Swiss-Prot;Acc:Q9Z1J3]
20851		ENSMUSG00000020919	20851	Stat5b	Signal transducer and activator of transcription 5B [Source:UniProtKB/Swiss-Prot;Acc:P42232]
56748		ENSMUSG00000029993	56748	Nfu1	NFU1 iron-sulfur cluster scaffold homolog, mitochondrial Precursor (HIRA-interacting protein 5)(mHIRIP5) [Source:UniProtKB/Swiss-Prot;Acc:Q9QZ23]
14299		ENSMUSG00000062661	14299	Freq	Neuronal calcium sensor 1 (NCS-1)(Frequenin homolog) [Source:UniProtKB/Swiss-Prot;Acc:Q8BNY6]
69908		ENSMUSG00000003411	69908	Rab3b	Ras-related protein Rab-3B [Source:UniProtKB/Swiss-Prot;Acc:Q9CZT8]
18578		ENSMUSG00000028525	18578	Pde4b	phosphodiesterase 4B [Source:RefSeq peptide;Acc:NP_062814]
50529		ENSMUSG00000046756	50529	Mrps7	28S ribosomal protein S7, mitochondrial Precursor (S7mt)(MRP-S7) [Source:UniProtKB/Swiss-Prot;Acc:Q80X85]
20091		ENSMUSG00000028081	20091	Rps3a	40S ribosomal protein S3a [Source:UniProtKB/Swiss-Prot;Acc:P97351]
235320		ENSMUSG00000066687	235320	Zbtb16	zinc finger and BTB domain containing 16 [Source:RefSeq peptide;Acc:NP_001028496]
52700		ENSMUSG00000020803	52700	Txndc17	Thioredoxin domain-containing protein 17 (Thioredoxin-like protein 5)(14 kDa thioredoxin-related protein)(TRP14)(Protein 42-9-9) [Source:UniProtKB/Swiss-Prot;Acc:Q9CQM5]
11522		ENSMUSG00000074207	11522	Adh1	Alcohol dehydrogenase 1 (EC 1.1.1.1)(Alcohol dehydrogenase A subunit)(ADH-A2) [Source:UniProtKB/Swiss-Prot;Acc:P00329]
21823		ENSMUSG00000000214	21823	Th	Tyrosine 3-monooxygenase (EC 1.14.16.2)(Tyrosine 3-hydroxylase)(TH) [Source:UniProtKB/Swiss-Prot;Acc:P24529]
19989		ENSMUSG00000043716	19989	Rpl7	60S ribosomal protein L7 [Source:UniProtKB/Swiss-Prot;Acc:P14148]
13026		ENSMUSG00000005615	13026	Pcyt1a	Choline-phosphate cytidylyltransferase A (EC 2.7.7.15)(Phosphorylcholine transferase A)(CTP:phosphocholine cytidylyltransferase A)(CCT A)(CT A)(CCT-alpha) [Source:UniProtKB/Swiss-Prot;Acc:P49586]
51799		ENSMUSG00000006575	51799	Rundc3a	RUN domain-containing protein 3A (Rap2-interacting protein 8) [Source:UniProtKB/Swiss-Prot;Acc:O08576]
15481		ENSMUSG00000015656	15481	Hspa8	Heat shock cognate 71 kDa protein (Heat shock 70 kDa protein 8) [Source:UniProtKB/Swiss-Prot;Acc:P63017]
19166		ENSMUSG00000015671	19166	Psma2	Proteasome subunit alpha type-2 (EC 3.4.25.1)(Proteasome component C3)(Macropain subunit C3)(Multicatalytic endopeptidase complex subunit C3) [Source:UniProtKB/Swiss-Prot;Acc:P49722]
21351		ENSMUSG00000025503	21351	Taldo1	Transaldolase (EC 2.2.1.2) [Source:UniProtKB/Swiss-Prot;Acc:Q93092]
112403		ENSMUSG00000040482	112403	Dom3z	Protein Dom3Z (Dom-3 homolog Z) [Source:UniProtKB/Swiss-Prot;Acc:O70348]
14711		ENSMUSG00000002769	14711	Gnmt	Glycine N-methyltransferase (EC 2.1.1.20) [Source:UniProtKB/Swiss-Prot;Acc:Q9QXF8]
21762		ENSMUSG00000006998	432448 21762	Psmd2	26S proteasome non-ATPase regulatory subunit 2 (26S proteasome regulatory subunit RPN1)(26S proteasome regulatory subunit S2)(26S proteasome subunit p97) [Source:UniProtKB/Swiss-Prot;Acc:Q8VDM4]
18759		ENSMUSG00000037643	18759	Prkci	Protein kinase C iota type (EC 2.7.11.13)(nPKC-iota)(Atypical protein kinase C-lambda/iota)(aPKC-lambda/iota) [Source:UniProtKB/Swiss-Prot;Acc:Q62074]
22294		ENSMUSG00000001134	22294	Uxt	Protein UXT (Ubiquitously expressed transcript protein) [Source:UniProtKB/Swiss-Prot;Acc:Q9WTZ0]
21454		ENSMUSG00000068039	21454	Tcp1	T-complex protein 1 subunit alpha B (TCP-1-alpha)(CCT-alpha)(Tailless complex polypeptide 1B)(TCP-1-B) [Source:UniProtKB/Swiss-Prot;Acc:P11983]
111173		ENSMUSG00000030172	111173 100048600	Erc1	ELKS/RAB6-interacting/CAST family member 1 (ERC protein 1)(ERC1)(RAB6-interacting protein 2)(CAZ-associated structural protein 2)(CAST2) [Source:UniProtKB/Swiss-Prot;Acc:Q99MI1]
18752		ENSMUSG00000078816	18752	Prkcc	Protein kinase C gamma type (PKC-gamma)(EC 2.7.11.13) [Source:UniProtKB/Swiss-Prot;Acc:P63318]
11848		ENSMUSG00000007815	631743 11848 433749	Rhoa	Transforming protein RhoA Precursor [Source:UniProtKB/Swiss-Prot;Acc:Q9QUI0]
67903		ENSMUSG00000019433	67903	Gipc1	PDZ domain-containing protein GIPC1 (RGS19-interacting protein 1)(GAIP C-terminus-interacting protein)(RGS-GAIP-interacting protein)(Synectin)(SemaF cytoplasmic domain-associated protein 1)(SEMCAP-1) [Source:UniProtKB/Swiss-Prot;Acc:Q9Z0G0]
18708		ENSMUSG00000041417	18708	Pik3r1	Phosphatidylinositol 3-kinase regulatory subunit alpha (PI3-kinase p85 subunit alpha)(PtdIns-3-kinase p85-alpha)(PI3K) [Source:UniProtKB/Swiss-Prot;Acc:P26450]
53380		ENSMUSG00000031429	53380	Psmd10	26S proteasome non-ATPase regulatory subunit 10 (26S proteasome regulatory subunit p28)(Gankyrin) [Source:UniProtKB/Swiss-Prot;Acc:Q9Z2X2]
18479		ENSMUSG00000030774	18479	Pak1	Serine/threonine-protein kinase PAK 1 (EC 2.7.11.1)(p21-activated kinase 1)(PAK-1)(p65-PAK)(Alpha-PAK)(CDC42/RAC effector kinase PAK-A) [Source:UniProtKB/Swiss-Prot;Acc:O88643]
70247		ENSMUSG00000026229	70247	Psmd1	26S proteasome non-ATPase regulatory subunit 1 (26S proteasome regulatory subunit RPN2)(26S proteasome regulatory subunit S1) [Source:UniProtKB/Swiss-Prot;Acc:Q3TXS7]
11757		ENSMUSG00000024997	11757	Prdx3	Thioredoxin-dependent peroxide reductase, mitochondrial Precursor (EC 1.11.1.15)(Perioredoxin-3)(PRX III)(Antioxidant protein 1)(AOP-1)(Protein MER5) [Source:UniProtKB/Swiss-Prot;Acc:P20108]
11651		ENSMUSG00000001729	11651 100047666	Akt1	RAC-alpha serine/threonine-protein kinase (EC 2.7.11.1)(RAC-PK-alpha)(AKT1 kinase)(C-AKT)(Protein kinase B)(PKB)(Thymoma viral proto-oncogene) [Source:UniProtKB/Swiss-Prot;Acc:P31750]
26398		ENSMUSG00000033352	26398	Map2k4	Dual specificity mitogen-activated protein kinase kinase 4 (MAP kinase kinase 4)(MAPKK 4)(EC 2.7.12.2)(MAPK/ERK kinase 4)(JNK-activating kinase 1)(C-JUN N-terminal kinase kinase 1)(JNK kinase 1)(JNKK 1)(SAPK/ERK kinase 1)(SEK1) [Source:UniProtKB/Swiss-Prot;Acc:P47809]
12890		ENSMUSG00000025867	12890	Cplx2	Complexin-2 (Complexin II)(CPX II)(Synaphin-1)(921-L) [Source:UniProtKB/Swiss-Prot;Acc:P84086]
58214		ENSMUSG00000033156	58214	Cst10	cystatin 10 (chondrocytes) [Source:RefSeq peptide;Acc:NP_067380]
171388		ENSMUSG00000028115	171388	Bnipl	Bcl-2/adenovirus E1B 19 kDa-interacting protein 2-like protein [Source:UniProtKB/Swiss-Prot;Acc:Q99JU7]
19944		ENSMUSG00000048758	433941 100045312 666642 666111 545718 665032 622707 100046734 19944	Rpl29	60S ribosomal protein L29 [Source:UniProtKB/Swiss-Prot;Acc:P47915]
26404		ENSMUSG00000023050	26404	Map3k12	Mitogen-activated protein kinase kinase kinase 12 (EC 2.7.11.25)(Mixed lineage kinase)(Leucine-zipper protein kinase)(ZPK)(Dual leucine zipper bearing kinase)(DLK)(MAPK-upstream kinase)(MUK) [Source:UniProtKB/Swiss-Prot;Acc:Q60700]
19419		ENSMUSG00000027347	19419	Rasgrp1	RAS guanyl-releasing protein 1 (Ras guanyl-releasing protein)(Calcium and DAG-regulated guanine nucleotide exchange factor II)(CalDAG-GEFII) [Source:UniProtKB/Swiss-Prot;Acc:Q9Z1S3]
64652		ENSMUSG00000021910	64652	Nisch	Nischarin (Imidazoline receptor 1)(IR1)(I-1)(Imidazoline-1 receptor)(I1R)(Imidazoline receptor I-1-like protein) [Source:UniProtKB/Swiss-Prot;Acc:Q80TM9]
12465		ENSMUSG00000022234	12465	Cct5	T-complex protein 1 subunit epsilon (TCP-1-epsilon)(CCT-epsilon) [Source:UniProtKB/Swiss-Prot;Acc:P80316]
21817		ENSMUSG00000037820	21817	Tgm2	Protein-glutamine gamma-glutamyltransferase 2 (EC 2.3.2.13)(Tissue transglutaminase)(TGase C)(TGC)(TG(C))(Transglutaminase-2) [Source:UniProtKB/Swiss-Prot;Acc:P21981]
57344		ENSMUSG00000003559	57344	As3mt	Arsenite methyltransferase (EC 2.1.1.137)(S-adenosyl-L-methionine:arsenic(III) methyltransferase)(Methylarsonite methyltransferase) [Source:UniProtKB/Swiss-Prot;Acc:Q91WU5]
cellular component----contractile fiber part----GO:0044449
C=87;O=38;E=19.82;R=1.92;rawP=1.14e-05;adjP=0.0002
22138		ENSMUSG00000051747	22138	Ttn	Titin (EC 2.7.11.1)(Connectin) [Source:UniProtKB/Swiss-Prot;Acc:A2ASS6]
11937		ENSMUSG00000030730	11937	Atp2a1	Sarcoplasmic/endoplasmic reticulum calcium ATPase 1 (SERCA1)(EC 3.6.3.8)(Calcium pump 1)(Calcium-transporting ATPase sarcoplasmic reticulum type, fast twitch skeletal muscle isoform)(SR Ca(2+)-ATPase 1)(Endoplasmic reticulum class 1/2 Ca(2+) ATPase) [Source:UniProtKB/Swiss-Prot;Acc:Q8R429]
59091		ENSMUSG00000017817	59091	Jph2	Junctophilin-2 (Junctophilin type 2)(JP-2) [Source:UniProtKB/Swiss-Prot;Acc:Q9ET78]
15507		ENSMUSG00000004951	15507	Hspb1	Heat shock protein beta-1 (HspB1)(Heat shock 27 kDa protein)(HSP 27)(Growth-related 25 kDa protein)(P25)(HSP25) [Source:UniProtKB/Swiss-Prot;Acc:P14602]
17885		ENSMUSG00000055775	17885	Myh8	Myosin-8 (Myosin heavy chain 8)(Myosin heavy chain, skeletal muscle, perinatal)(MyHC-perinatal) [Source:UniProtKB/Swiss-Prot;Acc:P13542]
26549		ENSMUSG00000031312	26549	Itgb1bp2	Integrin beta-1-binding protein 2 (Melusin) [Source:UniProtKB/Swiss-Prot;Acc:Q9R000]
17884		ENSMUSG00000057003	17884	Myh4	Myosin-4 (Myosin heavy chain 4)(Myosin heavy chain 2b)(MyHC-2b) [Source:UniProtKB/Swiss-Prot;Acc:Q5SX39]
16669		ENSMUSG00000020911	16669	Krt19	Keratin, type I cytoskeletal 19 (Cytokeratin-19)(CK-19)(Keratin-19)(K19) [Source:UniProtKB/Swiss-Prot;Acc:P19001]
24131		ENSMUSG00000021798	24131	Ldb3	LIM domain-binding protein 3 (Z-band alternatively spliced PDZ-motif protein)(Protein cypher)(Protein oracle) [Source:UniProtKB/Swiss-Prot;Acc:Q9JKS4]
52666		ENSMUSG00000019467	52666	D10Ertd610e	Guanine nucleotide exchange factor GEFT (RhoA/Rac/Cdc42 guanine nucleotide exchange factor GEFT)(Rac/Cdc42/Rho exchange factor GEFT)(p63RhoGEF) [Source:UniProtKB/Swiss-Prot;Acc:Q9CWR0]
11459		ENSMUSG00000031972	11459	Acta1	Actin, alpha skeletal muscle (Alpha-actin-1) [Source:UniProtKB/Swiss-Prot;Acc:P68134]
21925		ENSMUSG00000017300	21925	Tnnc2	Troponin C, skeletal muscle (STNC) [Source:UniProtKB/Swiss-Prot;Acc:P20801]
53311		ENSMUSG00000042451	53311	Mybph	Myosin-binding protein H (MyBP-H)(H-protein) [Source:UniProtKB/Swiss-Prot;Acc:P70402]
225115		ENSMUSG00000024236	225115	Svil	Supervillin (Archvillin)(p205/p250) [Source:UniProtKB/Swiss-Prot;Acc:Q8K4L3]
19055		ENSMUSG00000028161	19055	Ppp3ca	Serine/threonine-protein phosphatase 2B catalytic subunit alpha isoform (EC 3.1.3.16)(Calmodulin-dependent calcineurin A subunit alpha isoform)(CAM-PRP catalytic subunit) [Source:UniProtKB/Swiss-Prot;Acc:P63328]
20533		ENSMUSG00000006574	20533	Slc4a1	Band 3 anion transport protein (Anion exchange protein 1)(Anion exchanger 1)(AE 1)(Solute carrier family 4 member 1)(MEB3)(CD233 antigen) [Source:UniProtKB/Swiss-Prot;Acc:P04919]
12955		ENSMUSG00000032060	12955	Cryab	Alpha-crystallin B chain (Alpha(B)-crystallin)(P23) [Source:UniProtKB/Swiss-Prot;Acc:P23927]
20191		ENSMUSG00000021313	20191	Ryr2	ryanodine receptor 2, cardiac [Source:RefSeq peptide;Acc:NP_076357]
12345		ENSMUSG00000028745	12345	Capzb	F-actin-capping protein subunit beta (CapZ beta) [Source:UniProtKB/Swiss-Prot;Acc:P47757]
14812		ENSMUSG00000030209	14812	Grin2b	Glutamate [NMDA] receptor subunit epsilon-2 Precursor (N-methyl D-aspartate receptor subtype 2B)(NMDAR2B)(NR2B) [Source:UniProtKB/Swiss-Prot;Acc:Q01097]
17888		ENSMUSG00000040752	17888	Myh6	Myosin-6 (Myosin heavy chain 6)(Myosin heavy chain, cardiac muscle alpha isoform)(MyHC-alpha) [Source:UniProtKB/Swiss-Prot;Acc:Q02566]
17929		ENSMUSG00000024049	17929	Myom1	Myomesin-1 (Myomesin family member 1)(Skelemin) [Source:UniProtKB/Swiss-Prot;Acc:Q62234]
53318		ENSMUSG00000031636	53318	Pdlim3	PDZ and LIM domain protein 3 (Actinin-associated LIM protein)(Alpha-actinin-2-associated LIM protein) [Source:UniProtKB/Swiss-Prot;Acc:O70209]
21954		ENSMUSG00000035458	21954	Tnni3	Troponin I, cardiac muscle (Cardiac troponin I) [Source:UniProtKB/Swiss-Prot;Acc:P48787]
19309		ENSMUSG00000032648	19309	Pygm	Glycogen phosphorylase, muscle form (EC 2.4.1.1)(Myophosphorylase) [Source:UniProtKB/Swiss-Prot;Acc:Q9WUB3]
14359		ENSMUSG00000027680	14359	Fxr1	Fragile X mental retardation syndrome-related protein 1 (mFxr1p) [Source:UniProtKB/Swiss-Prot;Acc:Q61584]
68016		ENSMUSG00000028348	68016	Murc	Muscle-related coiled-coil protein (Muscle-restricted coiled-coil protein) [Source:UniProtKB/Swiss-Prot;Acc:A2AMM0]
12387		ENSMUSG00000006932	12387	Ctnnb1	Catenin beta-1 (Beta-catenin) [Source:UniProtKB/Swiss-Prot;Acc:Q02248]
12292		ENSMUSG00000026407	12292	Cacna1s	Voltage-dependent L-type calcium channel subunit alpha-1S (Voltage-gated calcium channel subunit alpha Cav1.1)(Calcium channel, L type, alpha-1 polypeptide, isoform 3, skeletal muscle) [Source:UniProtKB/Swiss-Prot;Acc:Q02789]
12391		ENSMUSG00000062694	12391	Cav3	Caveolin-3 (M-caveolin) [Source:UniProtKB/Swiss-Prot;Acc:P51637]
56376		ENSMUSG00000028273	56376	Pdlim5	PDZ and LIM domain protein 5 (Enigma homolog)(Enigma-like PDZ and LIM domains protein) [Source:UniProtKB/Swiss-Prot;Acc:Q8CI51]
18479		ENSMUSG00000030774	18479	Pak1	Serine/threonine-protein kinase PAK 1 (EC 2.7.11.1)(p21-activated kinase 1)(PAK-1)(p65-PAK)(Alpha-PAK)(CDC42/RAC effector kinase PAK-A) [Source:UniProtKB/Swiss-Prot;Acc:O88643]
20190		ENSMUSG00000030592	20190	Ryr1	ryanodine receptor 1, skeletal muscle [Source:RefSeq peptide;Acc:NP_033135]
16480		ENSMUSG00000001552	16480	Jup	Junction plakoglobin (Desmoplakin-3)(Desmoplakin III) [Source:UniProtKB/Swiss-Prot;Acc:Q02257]
58916		ENSMUSG00000024471	58916	Myot	Myotilin (Titin immunoglobulin domain protein)(Myofibrillar titin-like Ig domains protein) [Source:UniProtKB/Swiss-Prot;Acc:Q9JIF9]
13346		ENSMUSG00000026208	13346	Des	Desmin [Source:UniProtKB/Swiss-Prot;Acc:P31001]
22330		ENSMUSG00000021823	22330	Vcl	Vinculin (Metavinculin) [Source:UniProtKB/Swiss-Prot;Acc:Q64727]
20971		ENSMUSG00000017009	20971	Sdc4	Syndecan-4 Precursor (SYND4)(Ryudocan core protein) [Source:UniProtKB/Swiss-Prot;Acc:O35988]
cellular component----sarcoplasmic reticulum----GO:0016529
C=28;O=17;E=6.38;R=2.67;rawP=1.76e-05;adjP=0.0003
11937		ENSMUSG00000030730	11937	Atp2a1	Sarcoplasmic/endoplasmic reticulum calcium ATPase 1 (SERCA1)(EC 3.6.3.8)(Calcium pump 1)(Calcium-transporting ATPase sarcoplasmic reticulum type, fast twitch skeletal muscle isoform)(SR Ca(2+)-ATPase 1)(Endoplasmic reticulum class 1/2 Ca(2+) ATPase) [Source:UniProtKB/Swiss-Prot;Acc:Q8R429]
59091		ENSMUSG00000017817	59091	Jph2	Junctophilin-2 (Junctophilin type 2)(JP-2) [Source:UniProtKB/Swiss-Prot;Acc:Q9ET78]
19309		ENSMUSG00000032648	19309	Pygm	Glycogen phosphorylase, muscle form (EC 2.4.1.1)(Myophosphorylase) [Source:UniProtKB/Swiss-Prot;Acc:Q9WUB3]
12372		ENSMUSG00000007122	12372	Casq1	Calsequestrin-1 Precursor (Calsequestrin, skeletal muscle isoform) [Source:UniProtKB/Swiss-Prot;Acc:O09165]
20193		ENSMUSG00000044080	20193	S100a1	Protein S100-A1 (S100 calcium-binding protein A1)(S-100 protein subunit alpha)(S-100 protein alpha chain) [Source:UniProtKB/Swiss-Prot;Acc:P56565]
17540		ENSMUSG00000005611	17540	Mrvi1	Protein MRVI1 (Murine retrovirus integration site 1 protein)(Inositol 1,4,5-triphosphate receptor-associated cGMP kinase substrate)(JAW1-related protein MRVI1) [Source:UniProtKB/Swiss-Prot;Acc:Q9WUX5]
12292		ENSMUSG00000026407	12292	Cacna1s	Voltage-dependent L-type calcium channel subunit alpha-1S (Voltage-gated calcium channel subunit alpha Cav1.1)(Calcium channel, L type, alpha-1 polypeptide, isoform 3, skeletal muscle) [Source:UniProtKB/Swiss-Prot;Acc:Q02789]
20224		ENSMUSG00000020088	20224	Sar1a	GTP-binding protein SAR1a [Source:UniProtKB/Swiss-Prot;Acc:P36536]
11870		ENSMUSG00000030996	11870	Art1	GPI-linked NAD(P)(+)--arginine ADP-ribosyltransferase 1 Precursor (EC 2.4.2.31)(Mono(ADP-ribosyl)transferase)(YAC-1)(CD296 antigen) [Source:UniProtKB/Swiss-Prot;Acc:Q60935]
12295		ENSMUSG00000020882	12295	Cacnb1	Voltage-dependent L-type calcium channel subunit beta-1 (CAB1)(Calcium channel voltage-dependent subunit beta 1) [Source:UniProtKB/Swiss-Prot;Acc:Q8R3Z5]
12321		ENSMUSG00000029767	12321	Calu	Calumenin Precursor (Crocalbin) [Source:UniProtKB/Swiss-Prot;Acc:O35887]
12293		ENSMUSG00000040118	12293	Cacna2d1	Voltage-dependent calcium channel subunit alpha-2/delta-1 Precursor (Voltage-gated calcium channel subunit alpha-2/delta-1) [Contains Voltage-dependent calcium channel subunit alpha-2-1;Voltage-dependent calcium channel subunit delta-1] [Source:UniProtKB/Swiss-Prot;Acc:O08532]
16439		ENSMUSG00000030287	16439	Itpr2	Inositol 1,4,5-trisphosphate receptor type 2 (Type 2 inositol 1,4,5-trisphosphate receptor)(Type 2 InsP3 receptor)(IP3 receptor isoform 2)(InsP3R2)(Inositol 1,4,5-trisphosphate type V receptor) [Source:UniProtKB/Swiss-Prot;Acc:Q9Z329]
71912		ENSMUSG00000020216	71912	Jsrp1	Junctional sarcoplasmic reticulum protein 1 (Junctional-face membrane protein of 45 kDa homolog)(JP-45) [Source:UniProtKB/Swiss-Prot;Acc:Q3MI48]
20190		ENSMUSG00000030592	20190	Ryr1	ryanodine receptor 1, skeletal muscle [Source:RefSeq peptide;Acc:NP_033135]
14225		ENSMUSG00000032966	14225	Fkbp1a	Peptidyl-prolyl cis-trans isomerase FKBP1A (PPIase FKBP1A)(EC 5.2.1.8)(FK506-binding protein 1A)(FKBP-1A)(Rotamase)(Immunophilin FKBP12)(12 kDa FKBP)(FKBP-12) [Source:UniProtKB/Swiss-Prot;Acc:P26883]
20191		ENSMUSG00000021313	20191	Ryr2	ryanodine receptor 2, cardiac [Source:RefSeq peptide;Acc:NP_076357]
cellular component----ribosome----GO:0005840
C=170;O=76;E=38.73;R=1.96;rawP=1.48e-10;adjP=9.40e-09
76846		ENSMUSG00000006333	76846	Rps9	40S ribosomal protein S9 [Source:UniProtKB/Swiss-Prot;Acc:Q6ZWN5]
19933		ENSMUSG00000068397	100044606 100047314 676253 19933 620771 100045613 634339 636855 100046478 100043184 675278 676590 100047019 545423 100039601 100046290 100041000	AC108821.6-1	60S ribosomal protein L21 [Source:UniProtKB/Swiss-Prot;Acc:O09167]
20103		ENSMUSG00000012848	20103	Rps5	40S ribosomal protein S5 [Contains 40S ribosomal protein S5, N-terminally processed] [Source:UniProtKB/Swiss-Prot;Acc:P97461]
64655		ENSMUSG00000032459	64655	Mrps22	28S ribosomal protein S22, mitochondrial (S22mt)(MRP-S22) [Source:UniProtKB/Swiss-Prot;Acc:Q9CXW2]
18096		ENSMUSG00000035187	18096	Nkx6-1	Homeobox protein Nkx-6.1 [Source:UniProtKB/Swiss-Prot;Acc:Q99MA9]
27398		ENSMUSG00000002767	27398	Mrpl2	39S ribosomal protein L2, mitochondrial Precursor (L2mt)(MRP-L2) [Source:UniProtKB/Swiss-Prot;Acc:Q9D773]
20826		ENSMUSG00000063480	637555 100040177 20826 434401	Nhp2l1	NHP2-like protein 1 (High mobility group-like nuclear protein 2 homolog 1)(U4/U6.U5 tri-snRNP 15.5 kDa protein)(Sperm-specific antigen 1)(Fertilization antigen 1)(FA-1) [Source:UniProtKB/Swiss-Prot;Acc:Q9D0T1]
75398		ENSMUSG00000015672	75398	Mrpl32	39S ribosomal protein L32, mitochondrial Precursor (L32mt)(MRP-L32)(Heart-expressed gene 1 protein) [Source:UniProtKB/Swiss-Prot;Acc:Q9DCI9]
27176		ENSMUSG00000062647	666669 100047006 626683 667147 545512 664947 27176	Rpl7a	60S ribosomal protein L7a (Surfeit locus protein 3) [Source:UniProtKB/Swiss-Prot;Acc:P12970]
66448		ENSMUSG00000029066	66448	Mrpl20	39S ribosomal protein L20, mitochondrial Precursor (L20mt)(MRP-L20) [Source:UniProtKB/Swiss-Prot;Acc:Q9CQL4]
22190		ENSMUSG00000008348	100048105 22190	EG216818	Ubiquitin [Source:UniProtKB/Swiss-Prot;Acc:P62991]
19896		ENSMUSG00000037805	100043141 100046648 19896	Rpl10a	60S ribosomal protein L10a (CSA-19)(Neural precursor cell expressed developmentally down-regulated protein 6)(NEDD-6) [Source:UniProtKB/Swiss-Prot;Acc:P53026]
108160		ENSMUSG00000001962	108160	Fam50a	Protein FAM50A (Protein XAP-5) [Source:UniProtKB/Swiss-Prot;Acc:Q9WV03]
20116		ENSMUSG00000047675	20116 100043763 100039036 100040298	Rps8	40S ribosomal protein S8 [Source:UniProtKB/Swiss-Prot;Acc:P62242]
79044		ENSMUSG00000038880	79044	Mrps34	28S ribosomal protein S34, mitochondrial (S34mt)(MRP-S34)(T-complex expressed gene 2 protein) [Source:UniProtKB/Swiss-Prot;Acc:Q9JIK9]
52443		ENSMUSG00000030706	52443	Mrpl48	39S ribosomal protein L48, mitochondrial Precursor (L48mt)(MRP-L48) [Source:UniProtKB/Swiss-Prot;Acc:Q8JZS9]
68611		ENSMUSG00000024181	68611	Mrpl28	39S ribosomal protein L28, mitochondrial Precursor (L28mt)(MRP-L28) [Source:UniProtKB/Swiss-Prot;Acc:Q9D1B9]
66242		ENSMUSG00000049960	66242	Mrps16	28S ribosomal protein S16, mitochondrial Precursor (S16mt)(MRP-S16) [Source:UniProtKB/Swiss-Prot;Acc:Q9CPX7]
19981		ENSMUSG00000046330	19981 100042986 632394 100045996 100043732 100047998 668941	Rpl37a	60S ribosomal protein L37a [Source:UniProtKB/Swiss-Prot;Acc:P61514]
66230		ENSMUSG00000040269	66230	Mrps28	28S ribosomal protein S28, mitochondrial (S28mt)(MRP-S28) [Source:UniProtKB/Swiss-Prot;Acc:Q9CY16]
67036		ENSMUSG00000018882	67036	Mrpl45	39S ribosomal protein L45, mitochondrial Precursor (L45mt)(MRP-L45) [Source:UniProtKB/Swiss-Prot;Acc:Q9D0Q7]
20112		ENSMUSG00000023809	20112 100048858	Rps6ka2	Ribosomal protein S6 kinase alpha-2 (S6K-alpha 2)(EC 2.7.11.1)(90 kDa ribosomal protein S6 kinase 2)(p90-RSK 2)(Ribosomal S6 kinase 3)(RSK-3)(pp90RSK3)(Protein-tyrosine kinase Mpk-9)(MAP kinase-activated protein kinase 1c)(MAPKAPK1C) [Source:UniProtKB/Swiss-Prot;Acc:Q9WUT3]
22187		ENSMUSG00000019505	22187 667759	Ubb	Ubiquitin [Source:UniProtKB/Swiss-Prot;Acc:P62991]
24030		ENSMUSG00000045948	24030	Mrps12	28S ribosomal protein S12, mitochondrial Precursor (S12mt)(MRP-S12)(MT-RPS12) [Source:UniProtKB/Swiss-Prot;Acc:O35680]
20005		ENSMUSG00000047215	100042832 20005 433546 100048162 100042823	Rpl9	60S ribosomal protein L9 [Source:UniProtKB/Swiss-Prot;Acc:P51410]
19653		ENSMUSG00000056951	19653	Rbm4	RNA-binding protein 4 (RNA-binding motif protein 4)(RNA-binding motif protein 4a)(Lark homolog)(mLark) [Source:UniProtKB/Swiss-Prot;Acc:Q8C7Q4]
57312		ENSMUSG00000031533	57312	Mrps31	28S ribosomal protein S31, mitochondrial Precursor (S31mt)(MRP-S31)(Imogen 38) [Source:UniProtKB/Swiss-Prot;Acc:Q61733]
668668		ENSMUSG00000044609	668668	AC102561.4-1	predicted gene, EG668668 [Source:RefSeq peptide;Acc:NP_001074505]
15461		ENSMUSG00000025499	15461	Hras1	GTPase HRas Precursor (Transforming protein p21)(p21ras)(H-Ras-1)(c-H-ras) [Contains GTPase HRas, N-terminally processed] [Source:UniProtKB/Swiss-Prot;Acc:Q61411]
67994		ENSMUSG00000030611	67994	Mrps11	28S ribosomal protein S11, mitochondrial Precursor (S11mt)(MRP-S11) [Source:UniProtKB/Swiss-Prot;Acc:Q9DCA2]
67097		ENSMUSG00000052146	668457 67097	Rps10	40S ribosomal protein S10 [Source:UniProtKB/Swiss-Prot;Acc:P63325]
16785		ENSMUSG00000032518	433141 432548 636901 100045332 634672 16785 433712	Rpsa	40S ribosomal protein SA (Laminin receptor 1)(LamR)(37/67 kDa laminin receptor)(LRP/LR)(Laminin-binding protein precursor p40)(LBP/p40)(37 kDa laminin receptor precursor)(37LRP)(67 kDa laminin receptor)(67LR)(37 kDa oncofetal antigen)(OFA/iLRP) [Source:UniProtKB/Swiss-Prot;Acc:P14206]
27397		ENSMUSG00000030879	27397	Mrpl17	39S ribosomal protein L17, mitochondrial Precursor (L17mt)(MRP-L17) [Source:UniProtKB/Swiss-Prot;Acc:Q9D8P4]
66128		ENSMUSG00000061474	100043826 66128 100047151 100048032 100046779	Mrps36	28S ribosomal protein S36, mitochondrial (S36mt)(MRP-S36) [Source:UniProtKB/Swiss-Prot;Acc:Q9CQX8]
19899		ENSMUSG00000059070	19899	Rpl18	60S ribosomal protein L18 [Source:UniProtKB/Swiss-Prot;Acc:P35980]
94063		ENSMUSG00000024683	94063	Mrpl16	39S ribosomal protein L16, mitochondrial Precursor (L16mt)(MRP-L16) [Source:UniProtKB/Swiss-Prot;Acc:Q99N93]
66211		ENSMUSG00000002500	66211	Rpl3l	ribosomal protein L3-like [Source:RefSeq peptide;Acc:NP_079701]
67270		ENSMUSG00000062981	623346 67270	Mrpl42	28S ribosomal protein L42, mitochondrial Precursor (L42mt)(MRP-L42)(28S ribosomal protein S32, mitochondrial)(S32mt)(MRP-S32)(MRP-L31) [Source:UniProtKB/Swiss-Prot;Acc:Q9CPV3]
100047372		ENSMUSG00000028936	100047372 19934	Rpl22	60S ribosomal protein L22 (Heparin-binding protein HBp15) [Source:UniProtKB/Swiss-Prot;Acc:P67984]
68735		ENSMUSG00000016833	68735	Mrps18c	28S ribosomal protein S18c, mitochondrial Precursor (MRP-S18-c)(Mrps18c)(MRP-S18-1) [Source:UniProtKB/Swiss-Prot;Acc:Q8R2L5]
80288		ENSMUSG00000063382	80288	Bcl9l	B-cell CLL/lymphoma 9-like protein (B-cell lymphoma 9-like protein)(BCL9-like protein)(BCL9-related beta-catenin-binding protein)(Protein BCL9-2) [Source:UniProtKB/Swiss-Prot;Acc:Q67FY2]
60441		ENSMUSG00000020775	60441	Mrpl38	39S ribosomal protein L38, mitochondrial Precursor (L38mt)(MRP-L38) [Source:UniProtKB/Swiss-Prot;Acc:Q8K2M0]
100043295		ENSMUSG00000058558	668936 100045256 665407 19983 100043295	Rpl5	60S ribosomal protein L5 [Source:UniProtKB/Swiss-Prot;Acc:P47962]
20091		ENSMUSG00000028081	20091	Rps3a	40S ribosomal protein S3a [Source:UniProtKB/Swiss-Prot;Acc:P97351]
94067		ENSMUSG00000025208	94067	Mrpl43	39S ribosomal protein L43, mitochondrial Precursor (L43mt)(MRP-L43)(Mitochondrial ribosomal protein bMRP36a) [Source:UniProtKB/Swiss-Prot;Acc:Q99N89]
50529		ENSMUSG00000046756	50529	Mrps7	28S ribosomal protein S7, mitochondrial Precursor (S7mt)(MRP-S7) [Source:UniProtKB/Swiss-Prot;Acc:Q80X85]
67945		ENSMUSG00000066809	67945	Rpl41	60S ribosomal protein L41 [Source:UniProtKB/Swiss-Prot;Acc:P62947]
66973		ENSMUSG00000024436	66973	Mrps18b	28S ribosomal protein S18b, mitochondrial Precursor (MRP-S18-b)(Mrps18b)(MRP-S18-2) [Source:UniProtKB/Swiss-Prot;Acc:Q99N84]
22066		ENSMUSG00000027748	22066	Trpc4	Short transient receptor potential channel 4 (TrpC4)(Receptor-activated cation channel TRP4)(Capacitative calcium entry channel Trp4) [Source:UniProtKB/Swiss-Prot;Acc:Q9QUQ5]
64658		ENSMUSG00000014551	64658	Mrps25	28S ribosomal protein S25, mitochondrial (S25mt)(MRP-S25) [Source:UniProtKB/Swiss-Prot;Acc:Q9D125]
28028		ENSMUSG00000044018	28028	Mrpl50	39S ribosomal protein L50, mitochondrial (L50mt)(MRP-L50) [Source:UniProtKB/Swiss-Prot;Acc:Q8VDT9]
19989		ENSMUSG00000043716	19989	Rpl7	60S ribosomal protein L7 [Source:UniProtKB/Swiss-Prot;Acc:P14148]
666487		ENSMUSG00000057322	633736 666487 67671 638514 674727 664868 625646	Rpl38	60S ribosomal protein L38 [Source:UniProtKB/Swiss-Prot;Acc:Q9JJI8]
224742		ENSMUSG00000038762	224742	Abcf1	ATP-binding cassette sub-family F member 1 [Source:UniProtKB/Swiss-Prot;Acc:Q6P542]
670565		ENSMUSG00000078106	670565	AC132088.4-1	NULL
627889		ENSMUSG00000057605	627889	AC126454.3	NULL
59054		ENSMUSG00000021731	59054	Mrps30	28S ribosomal protein S30, mitochondrial (S30mt)(MRP-S30) [Source:UniProtKB/Swiss-Prot;Acc:Q9D0G0]
94061		ENSMUSG00000029486	94061	Mrpl1	39S ribosomal protein L1, mitochondrial Precursor (L1mt)(MRP-L1) [Source:UniProtKB/Swiss-Prot;Acc:Q99N96]
22222		ENSMUSG00000027272	22222	Ubr1	E3 ubiquitin-protein ligase UBR1 (EC 6.3.2.-)(N-recognin-1)(Ubiquitin-protein ligase E3-alpha-1)(Ubiquitin-protein ligase E3-alpha-I) [Source:UniProtKB/Swiss-Prot;Acc:O70481]
19946		ENSMUSG00000058600	666899 664969 100045378 100040182 19946 667779	Rpl30-ps2	60S ribosomal protein L30 [Source:UniProtKB/Swiss-Prot;Acc:P62889]
67891		ENSMUSG00000032399	67891	Rpl4	60S ribosomal protein L4 [Source:UniProtKB/Swiss-Prot;Acc:Q9D8E6]
94065		ENSMUSG00000034880	94065	Mrpl34	39S ribosomal protein L34, mitochondrial Precursor (L34mt)(MRP-L34) [Source:UniProtKB/Swiss-Prot;Acc:Q99N91]
100046223		ENSMUSG00000063457	20054 100046223 633683	Rps15	40S ribosomal protein S15 (RIG protein) [Source:UniProtKB/Swiss-Prot;Acc:P62843]
66047		ENSMUSG00000034932	66047	Mrpl54	39S ribosomal protein L54, mitochondrial Precursor (L54mt)(MRP-L54) [Source:UniProtKB/Swiss-Prot;Acc:Q9CPW3]
67681		ENSMUSG00000057388	67681	Mrpl18	39S ribosomal protein L18, mitochondrial Precursor (L18mt)(MRP-L18) [Source:UniProtKB/Swiss-Prot;Acc:Q9CQL5]
68537		ENSMUSG00000022370	68537	Mrpl13	39S ribosomal protein L13, mitochondrial (L13mt)(MRP-L13) [Source:UniProtKB/Swiss-Prot;Acc:Q9D1P0]
26961		ENSMUSG00000003970	26961	Rpl8	60S ribosomal protein L8 [Source:UniProtKB/Swiss-Prot;Acc:P62918]
269261		ENSMUSG00000069682	633570 269261 630855 668706 622589	AC158592.4	60S ribosomal protein L12 [Source:UniProtKB/Swiss-Prot;Acc:P35979]
66845		ENSMUSG00000029142	66845	Mrpl33	39S ribosomal protein L33, mitochondrial (L33mt)(MRP-L33) [Source:UniProtKB/Swiss-Prot;Acc:Q9CQP0]
100039316		ENSMUSG00000038274	100039316 100048445 14109	Fau	Ubiquitin-like protein FUBI (Monoclonal non-specific suppressor factor beta)(MNSF-beta) [Source:UniProtKB/Swiss-Prot;Acc:P35545]
20664		ENSMUSG00000079994	20664	Sox1	Transcription factor SOX-1 [Source:UniProtKB/Swiss-Prot;Acc:P53783]
19944		ENSMUSG00000048758	433941 100045312 666642 666111 545718 665032 622707 100046734 19944	Rpl29	60S ribosomal protein L29 [Source:UniProtKB/Swiss-Prot;Acc:P47915]
69163		ENSMUSG00000026248	69163	Mrpl44	39S ribosomal protein L44, mitochondrial Precursor (L44mt)(EC 3.1.26.-)(MRP-L44) [Source:UniProtKB/Swiss-Prot;Acc:Q9CY73]
67186		ENSMUSG00000025508	100048062 67186	Rplp2	60S acidic ribosomal protein P2 [Source:UniProtKB/Swiss-Prot;Acc:P99027]
19935		ENSMUSG00000075279	100040519 100046620 19935	RP23-313J15.3	39S ribosomal protein L23, mitochondrial (L23mt)(MRP-L23)(L23 mitochondrial-related protein) [Source:UniProtKB/Swiss-Prot;Acc:O35972]
107734		ENSMUSG00000026087	100044791 621542 100041573 107734	Mrpl30	39S ribosomal protein L30, mitochondrial Precursor (L30mt)(MRP-L30) [Source:UniProtKB/Swiss-Prot;Acc:Q9D7N6]
cellular component----proteasome complex----GO:0000502
C=35;O=17;E=7.97;R=2.13;rawP=0.0007;adjP=0.0077
22123		ENSMUSG00000017221	22123	Psmd3	26S proteasome non-ATPase regulatory subunit 3 (26S proteasome regulatory subunit S3)(Proteasome subunit p58)(Transplantation antigen P91A)(Tum-P91A antigen) [Source:UniProtKB/Swiss-Prot;Acc:P14685]
19167		ENSMUSG00000060073	19167	Psma3	Proteasome subunit alpha type-3 (EC 3.4.25.1)(Proteasome component C8)(Macropain subunit C8)(Multicatalytic endopeptidase complex subunit C8)(Proteasome subunit K) [Source:UniProtKB/Swiss-Prot;Acc:O70435]
22222		ENSMUSG00000027272	22222	Ubr1	E3 ubiquitin-protein ligase UBR1 (EC 6.3.2.-)(N-recognin-1)(Ubiquitin-protein ligase E3-alpha-1)(Ubiquitin-protein ligase E3-alpha-I) [Source:UniProtKB/Swiss-Prot;Acc:O70481]
70247		ENSMUSG00000026229	70247	Psmd1	26S proteasome non-ATPase regulatory subunit 1 (26S proteasome regulatory subunit RPN2)(26S proteasome regulatory subunit S1) [Source:UniProtKB/Swiss-Prot;Acc:Q3TXS7]
20422		ENSMUSG00000042541	20422	Shfm1	26S proteasome complex subunit DSS1 (Split hand/foot malformation type 1 protein homolog)(Deleted in split hand/split foot protein 1 homolog)(Split hand/foot deleted protein 1 homolog) [Source:UniProtKB/Swiss-Prot;Acc:P60897]
15507		ENSMUSG00000004951	15507	Hspb1	Heat shock protein beta-1 (HspB1)(Heat shock 27 kDa protein)(HSP 27)(Growth-related 25 kDa protein)(P25)(HSP25) [Source:UniProtKB/Swiss-Prot;Acc:P14602]
15925		ENSMUSG00000056999	15925	Ide	Insulin-degrading enzyme (EC 3.4.24.56)(Insulin protease)(Insulinase)(Insulysin) [Source:UniProtKB/Swiss-Prot;Acc:Q9JHR7]
26442		ENSMUSG00000068749	26442	Psma5	Proteasome subunit alpha type-5 (EC 3.4.25.1)(Proteasome zeta chain)(Macropain zeta chain)(Multicatalytic endopeptidase complex zeta chain) [Source:UniProtKB/Swiss-Prot;Acc:Q9Z2U1]
26441		ENSMUSG00000032301	26441	Psma4	Proteasome subunit alpha type-4 (EC 3.4.25.1)(Proteasome component C9)(Macropain subunit C9)(Multicatalytic endopeptidase complex subunit C9)(Proteasome subunit L) [Source:UniProtKB/Swiss-Prot;Acc:Q9R1P0]
21762		ENSMUSG00000006998	432448 21762	Psmd2	26S proteasome non-ATPase regulatory subunit 2 (26S proteasome regulatory subunit RPN1)(26S proteasome regulatory subunit S2)(26S proteasome subunit p97) [Source:UniProtKB/Swiss-Prot;Acc:Q8VDM4]
19170		ENSMUSG00000014769	19170	Psmb1	Proteasome subunit beta type-1 Precursor (EC 3.4.25.1)(Proteasome component C5)(Macropain subunit C5)(Multicatalytic endopeptidase complex subunit C5)(Proteasome gamma chain) [Source:UniProtKB/Swiss-Prot;Acc:O09061]
19175		ENSMUSG00000018286	100048803 19175	Psmb6	Proteasome subunit beta type-6 Precursor (EC 3.4.25.1)(Proteasome delta chain)(Macropain delta chain)(Multicatalytic endopeptidase complex delta chain)(Proteasome subunit Y) [Source:UniProtKB/Swiss-Prot;Acc:Q60692]
30940		ENSMUSG00000022867	30940	Usp25	Ubiquitin carboxyl-terminal hydrolase 25 (EC 3.1.2.15)(Ubiquitin thioesterase 25)(Ubiquitin-specific-processing protease 25)(Deubiquitinating enzyme 25)(mUSP25) [Source:UniProtKB/Swiss-Prot;Acc:P57080]
19166		ENSMUSG00000015671	19166	Psma2	Proteasome subunit alpha type-2 (EC 3.4.25.1)(Proteasome component C3)(Macropain subunit C3)(Multicatalytic endopeptidase complex subunit C3) [Source:UniProtKB/Swiss-Prot;Acc:P49722]
26446		ENSMUSG00000069744	26446	Psmb3	Proteasome subunit beta type-3 (EC 3.4.25.1)(Proteasome theta chain)(Proteasome chain 13)(Proteasome component C10-II) [Source:UniProtKB/Swiss-Prot;Acc:Q9R1P1]
19172		ENSMUSG00000005779	19172	Psmb4	Proteasome subunit beta type-4 Precursor (Proteasome beta chain)(EC 3.4.25.1)(Macropain beta chain)(Multicatalytic endopeptidase complex beta chain)(Proteasome chain 3) [Source:UniProtKB/Swiss-Prot;Acc:P99026]
26444		ENSMUSG00000027566	26444	Psma7	Proteasome subunit alpha type-7 (EC 3.4.25.1)(Proteasome subunit RC6-1) [Source:UniProtKB/Swiss-Prot;Acc:Q9Z2U0]
Not Significant
11492
11498
11515
11517
11541
11544
11548
11549
11564
11682
11699
11717
11722
11735
11807
11811
11828
11833
12095
12123
12160
12163
12167
12182
12211
12227
12263
12299
12305
12308
12453
12495
12521
12555
12561
12562
12622
12627
12630
12739
12768
12817
12821
12836
12840
12891
12902
12905
12959
12960
12961
12968
12992
13135
13448
13487
13522
13524
13531
13615
13616
13636
13640
13663
13731
13837
13845
14000
14068
14129
14159
14290
14294
14308
14362
14369
14394
14400
14401
14403
14411
14431
14459
14527
14562
14601
14605
14608
14651
14714
14726
14787
14803
14823
14854
14869
14897
14911
14923
14938
14939
14943
15200
15203
15277
15465
15466
15468
15564
15566
16010
16163
16179
16182
16190
16324
16325
16370
16429
16449
16524
16618
16623
16644
16701
16768
16780
16797
16816
16820
16846
16852
16880
16904
16992
17000
17068
17075
17079
17083
17110
17167
17169
17224
17225
17227
17231
17274
17288
17384
17385
17389
17474
17528
17750
17836
17841
17844
17986
18048
18050
18169
18201
18245
18247
18256
18377
18386
18400
18406
18417
18488
18555
18557
18587
18718
18719
18793
18806
18816
18844
19023
19056
19057
19064
19094
19106
19111
19112
19116
19133
19217
19222
19263
19275
19329
19352
19700
19707
19746
19886
20133
20166
20187
20199
20202
20208
20209
20210
20211
20290
20299
20302
20307
20316
20348
20357
20358
20390
20418
20503
20505
20520
20534
20536
20537
20555
20568
20598
20605
20737
20810
20834
20856
20890
20911
20974
21766
21785
21822
21832
21968
22024
22068
22072
22094
22116
22122
22157
22195
22214
22225
22310
22324
22363
22377
22378
22414
22646
22787
23793
23795
23828
23831
23836
23854
23881
23919
23920
23943
23985
24013
24055
24070
26360
26361
26409
26563
26564
26569
26944
26946
26971
27045
27219
27279
27356
27357
27358
27375
27389
27409
28106
28253
29866
29869
30794
30838
30839
30840
30963
50497
50701
50722
50757
51801
51938
52118
52477
53419
53858
53885
53901
53970
54215
54612
55943
55979
56032
56057
56188
56299
56317
56370
56373
56422
56437
56506
56524
56531
56534
56640
56746
56760
57249
57260
57267
57751
57764
57916
58181
58187
58200
58233
58866
58988
58998
59005
59008
59052
60504
60531
63857
63872
63986
64082
64296
64339
65107
65247
65256
66042
66104
66155
66171
66199
66208
66240
66260
66261
66270
66375
66404
66510
66614
66665
66757
66763
66772
66786
66836
66901
66912
66980
66990
66996
67027
67044
67119
67231
67252
67302
67358
67374
67388
67395
67410
67448
67471
67483
67484
67547
67615
67630
67824
67866
67867
67873
67880
67893
67931
67935
68032
68043
68171
68212
68250
68295
68498
68520
68598
68730
68865
68936
69065
69151
69165
69226
69253
69306
69396
69536
69681
69740
69742
69804
69815
69993
70103
70186
70369
70387
70392
70579
70788
70839
71085
71099
71310
71538
71599
71706
71735
71755
71764
71776
71913
71919
71999
72002
72017
72022
72085
72125
72303
72373
72585
72615
72674
72795
72972
72978
73024
73121
73261
73296
73373
73456
73690
73738
73828
73940
74125
74180
74268
74319
74435
74585
74603
74840
75212
75533
75750
76294
76507
76775
76894
77044
77048
77704
77974
78004
78369
78767
78795
78914
78977
79043
80284
80879
80888
80914
80978
83433
83434
83771
83921
93968
94315
94332
94352
97998
100678
100727
100972
104010
107358
107392
107527
108143
108147
108897
109229
109801
109821
110213
110829
110957
116852
170706
192200
208718
216169
218518
224250
226830
226971
231646
231801
233670
258469
268527
381845
83701
20701
78408
20611
20702
93806
94254
76497
54394
Without Ontology
12054
12609
12777
13216
13226
13397
13445
13506
13532
13647
13924
13929
14429
14486
14526
14559
14761
14767
14790
14963
15202
15397
15551
15965
16019
16031
16061
16117
16604
16631
17140
17147
17345
17451
17857
18348
18553
18729
18824
19174
19791
19791
20603
Other Significant
11307
11438
11447
11451
11471
11481
11487
11529
11545
11565
11566
11643
11677
11682
11688
11694
11737
11764
11771
11781
11785
11792
11804
11807
11821
11827
11842
11844
11857
11863
11907
11910
11924
11980
11984
12006
12012
12020
12021
12023
12033
12038
12062
12064
12211
12229
12237
12282
12286
12291
12296
12299
12315
12316
12330
12335
12380
12386
12393
12416
12419
12421
12450
12460
12477
12494
12503
12504
12505
12518
12537
12544
12550
12554
12563
12569
12579
12585
12591
12608
12623
12626
12632
12660
12662
12672
12715
12725
12739
12745
12764
12774
12790
12796
12824
12848
12874
12904
12905
12916
12921
12927
12952
12959
12960
12961
12966
12968
12971
12995
13035
13039
13043
13046
13077
13079
13101
13109
13122
13131
13142
13144
13163
13191
13197
13198
13206
13340
13347
13370
13383
13390
13406
13427
13486
13498
13507
13527
13542
13560
13589
13593
13626
13655
13680
13685
13714
13717
13722
13731
13822
13823
13824
13855
13858
13870
13875
13885
13982
14000
14013
14043
14056
14073
14086
14087
14155
14161
14163
14167
14169
14184
14204
14218
14246
14260
14281
14300
14339
14345
14349
14376
14388
14419
14423
14447
14450
14470
14489
14534
14538
14567
14593
14616
14634
14683
14694
14702
14707
14787
14791
14802
14803
14804
14807
14859
14863
14866
14884
14885
14897
14904
14936
15000
15024
15042
15139
15184
15206
15254
15258
15260
15285
15388
15395
15404
15405
15408
15410
15412
15425
15426
15427
15434
15460
15469
15482
15484
15485
15500
15525
15936
15982
16004
16008
16160
16194
16195
16341
16398
16400
16407
16414
16420
16450
16453
16475
16477
16491
16492
16538
16568
16572
16573
16574
16580
16581
16588
16596
16661
16663
16665
16666
16667
16670
16675
16700
16772
16777
16783
16796
16816
16822
16842
16852
16869
16871
16881
16885
16906
16918
16939
16969
17089
17121
17135
17164
17165
17173
17191
17192
17193
17195
17196
17216
17221
17222
17224
17225
17227
17246
17250
17256
17260
17274
17293
17306
17308
17330
17344
17349
17350
17427
17475
17537
17690
17703
17764
17777
17855
17865
17872
17873
17898
17910
17913
17916
17930
17932
17955
17974
17975
18003
18021
18023
18029
18032
18034
18080
18089
18091
18099
18114
18141
18142
18150
18163
18185
18197
18205
18218
18221
18226
18241
18256
18286
18291
18312
18393
18417
18431
18440
18453
18458
18481
18515
18519
18521
18537
18553
18559
18577
18601
18631
18663
18670
18682
18703
18741
18844
18969
18972
18976
18983
18986
18987
19009
19042
19045
19075
19082
19106
19118
19119
19120
19142
19155
19157
19183
19200
19202
19213
19221
19244
19245
19258
19268
19290
19291
19301
19325
19329
19334
19348
19349
19358
19362
19373
19400
19654
19672
19696
19699
19700
19704
19708
19720
19724
19727
19734
19736
19878
19883
20018
20019
20021
20022
20166
20167
20174
20183
20184
20185
20204
20208
20209
20210
20211
20229
20230
20231
20238
20264
20272
20273
20318
20340
20344
20389
20391
20394
20399
20400
20447
20454
20473
20475
20476
20534
20562
20587
20624
20630
20639
20646
20648
20658
20677
20678
20698
20715
20719
20750
20751
20753
20773
20787
20813
20842
20860
20866
20869
20878
20888
20893
20897
20899
20901
20908
20924
20935
20947
20972
20977
20979
20980
21349
21357
21390
21400
21401
21402
21405
21410
21418
21422
21423
21453
21689
21744
21784
21803
21809
21822
21835
21843
21846
21849
21871
21877
21908
21939
21958
21987
22022
22040
22088
22127
22129
22135
22160
22183
22232
22248
22258
22260
22269
22289
22318
22320
22324
22326
22342
22343
22359
22368
22379
22380
22384
22390
22592
22594
22596
22608
22646
22661
22666
22668
22697
22709
22717
22719
22720
22754
22755
22759
22775
22791
23802
23805
23806
23807
23821
23825
23871
23874
23877
23879
23881
23882
23942
23950
23980
23988
23999
24000
24050
24053
24064
24086
24116
24136
26358
26370
26374
26378
26379
26381
26396
26407
26419
26431
26448
26466
26554
26561
26874
26893
26903
26918
26965
26992
27061
27204
27221
27224
27225
27360
27371
27374
27681
28113
29816
29856
29867
29871
30046
30052
30795
30843
30948
30960
50492
50496
50783
50796
50850
50868
50874
50887
50905
50907
50915
50916
50926
50934
50935
51811
51812
51960
52187
52348
52432
52552
52696
52793
52840
53356
53374
53376
53415
53420
53611
53620
53761
54004
54006
54120
54126
54150
54189
54201
54214
54219
54343
54351
54353
54380
54394
54411
54451
54524
54563
54609
54709
54712
54723
55927
55942
55949
55978
55981
55992
55994
56009
56013
56017
56046
56191
56217
56233
56249
56274
56289
56292
56305
56312
56336
56364
56369
56381
56395
56406
56407
56417
56437
56456
56464
56488
56505
56522
56523
56709
56727
56739
56747
56758
57230
57247
57258
57315
57430
57432
57435
57437
57438
57773
57908
58187
58202
58220
58244
58250
58522
58802
58991
58994
59001
59005
59012
59022
59038
59047
59050
59057
59058
59125
59126
60406
63856
63872
63986
64009
64011
64051
64214
64290
64292
64295
64337
64383
64384
64934
65973
66053
66055
66070
66073
66085
66094
66101
66106
66121
66131
66165
66241
66246
66277
66290
66310
66340
66354
66356
66366
66369
66388
66394
[truncated: 375 more rows]

## Sheet: Most negatives
Gene Symbol	Gene Description	Gene ID	Probe ID	MyHC 2B	MyHC 1	Gene Ontology
Anxa1	annexin A1	16952	M007393_01	-3.281 ± 0.939	-3.01 ± 1.173	Shown in Figure 3 A
Cav1	caveolin 1, caveolae protein	12389	M004189_01	-2.807 ± 0.846	-2.21 ± 0.811
Ccl4	chemokine (C-C motif) ligand 4	20303	M000414_01	-2.177 ± 0.983	-1.472 ± 0.861
Col14a1	collagen, type XIV, alpha 1	12818	M004924_01	-3.286 ± 0.954	-3.231 ± 0.626
Col8a1	collagen, type VIII, alpha 1	12837	M006524_01	-1.863 ± 0.852	-1.983 ± 1.418
Cxcl12	chemokine (C-X-C motif) ligand 12	20315	M000143_01	-2.528 ± 0.475	-2.137 ± 0.429
Dstn	destrin	56431	M004271_01	-2.279 ± 0.467	-1.716 ± 0.448
Eng	endoglin	13805	M001859_01	-2.626 ± 0.977	-2.077 ± 0.442
Esm1	endothelial cell-specific molecule 1	71690	M009700_01	-3.408 ± 0.874	-2.812 ± 0.717
F13a1	coagulation factor XIII, A1 subunit	74145	M007426_01	-2.786 ± 0.797	-2.363 ± 0.936
Fmod	fibromodulin	14264	M004936_01	-1.275 ± 0.485	-1.397 ± 0.942
Hbb-b1	hemoglobin, beta adult major chain	15129	M006659_01	-3.096 ± 0.923	-2.402 ± 0.599
Hif1a	hypoxia inducible factor 1, alpha subunit	15251	M006839_01	-2.685 ± 0.474	-2.125 ± 0.385
Igfbp6	insulin-like growth factor binding protein 6	16012	M003573_01	-3.008 ± 0.295	-2.869 ± 0.648
Lum	lumican	17022	M003292_01	-3.113 ± 0.492	-2.574 ± 0.603
Mgp	matrix Gla protein	17313	M005703_01	-2.312 ± 0.507	-2.586 ± 1.309
Pf4	platelet factor 4	56744	M003810_01	-3.122 ± 0.636	-2.876 ± 0.718
Pparg	peroxisome proliferator activated receptor gamma	19016	M001054_01	-1.78 ± 2.333	-1.626 ± 0.499
Rnase4	ribonuclease, RNase A family 4	58809	M006427_01	-4.124 ± 1.045	-3.654 ± 1.03
S100a6	S100 calcium binding protein A6 (calcyclin)	20200	M000388_01	-2.772 ± 0.929	-2.111 ± 0.68
Serping1	serine (or cysteine) peptidase inhibitor, clade G, member 1	12258	M004840_01	-3.039 ± 0.449	-2.218 ± 0.611
Tjp1	tight junction protein 1	21872	M001548_01	-2.954 ± 0.43	-2.337 ± 0.553
Tmod3	tropomodulin 3	50875	M004815_01	-2.775 ± 0.574	-2.68 ± 1.273
Tnmd	tenomodulin	64103	M010299_01	-3.283 ± 0.562	-3.172 ± 1.059
Wif1	Wnt inhibitory factor 1	24117	M004589_01	-3.611 ± 0.713	-3.425 ± 0.517
Most significant genes overexpressed in whole muscle
Gene Symbol	Gene Description	Gene ID	Probe ID	MyHC 2B	MyHC 1	Gene Ontology
Acer3	alkaline ceramidase 3	66190	M012169_01	-1.214 ± 1.255	-1.089 ± 0.564	endoplasmic reticulum
Acsl5	acyl-CoA synthetase long-chain family member 5	433256	M009094_01	-1.15 ± 0.598	-1.102 ± 0.529	endoplasmic reticulum
Arsb	arylsulfatase B	11881	M009183_01	-2.767 ± 0.493	-2.038 ± 0.553	endoplasmic reticulum
Car4	carbonic anhydrase 4	12351	M000603_01	-1.186 ± 0.573	-0.685 ± 0.336	endoplasmic reticulum
Cav1	caveolin 1, caveolae protein	12389	M004189_01	-2.807 ± 0.846	-2.21 ± 0.811	endoplasmic reticulum
Ccdc3	coiled-coil domain containing 3	74186	M007497_01	-1.647 ± 0.969	-1.171 ± 0.438	endoplasmic reticulum
Cubn	cubilin (intrinsic factor-cobalamin receptor)	65969	M000950_01	-1.361 ± 0.739	-1.403 ± 1.095	endoplasmic reticulum
Cyp4a10	cytochrome P450, family 4, subfamily a, polypeptide 10	13117	M002727_01	-0.914 ± 0.51	-0.961 ± 0.399	endoplasmic reticulum
Cyp4a14	cytochrome P450, family 4, subfamily a, polypeptide 14	13119	M002350_01	-1.414 ± 0.692	-0.901 ± 0.908	endoplasmic reticulum
Dpm3	dolichyl-phosphate mannosyltransferase polypeptide 3	68563	M006914_01	-1.146 ± 0.515	-0.893 ± 0.41	endoplasmic reticulum
Elovl1	elongation of very long chain fatty acids (FEN1/Elo2, SUR4/Elo3, yeast)-like 1	54325	M006350_01	-0.803 ± 0.629	-1.434 ± 0.932	endoplasmic reticulum
Gimap1	GTPase, IMAP family member 1	16205	M006526_01	-1.313 ± 0.727	-1.327 ± 0.613	endoplasmic reticulum
H2-Aa	histocompatibility 2, class II antigen A, alpha	14960	M002967_01	-1.346 ± 0.834	-1.104 ± 0.66	endoplasmic reticulum
Hsd3b7	hydroxy-delta-5-steroid dehydrogenase, 3 beta- and steroid delta-isomerase 7	101502	M011866_01	-1.268 ± 0.467	-1.407 ± 0.558	endoplasmic reticulum
Ifi47	interferon gamma inducible protein 47	15953	M003884_01	-1.608 ± 0.898	-1.742 ± 0.992	endoplasmic reticulum
Ifngr1	interferon gamma receptor 1	15979	M000163_01	-1.308 ± 0.632	-0.957 ± 0.619	endoplasmic reticulum
Itpr1	inositol 1,4,5-triphosphate receptor 1	16438	M000946_01	-1.297 ± 0.603	-2.69 ± 0.232	endoplasmic reticulum
Itpr1	inositol 1,4,5-triphosphate receptor 1	16438	M007009_01	-0.512 ± 0.422	-2.547 ± 0.526	endoplasmic reticulum
Mal	myelin and lymphocyte protein, T-cell differentiation protein	17153	M004848_01	-0.18 ± 0.717	-0.898 ± 0.548	endoplasmic reticulum
Mbtps1	membrane-bound transcription factor peptidase, site 1	56453	M004408_01	-0.968 ± 0.461	-0.881 ± 0.443	endoplasmic reticulum
Pkd2	polycystic kidney disease 2	18764	M002204_01	-2.647 ± 1.157	-2.35 ± 0.779	endoplasmic reticulum
Rcn3	reticulocalbin 3, EF-hand calcium binding domain	52377	M009005_01	-1.771 ± 0.92	-0.792 ± 0.445	endoplasmic reticulum
Rdh5	retinol dehydrogenase 5	19682	M002366_01	-1.809 ± 0.877	-0.98 ± 0.726	endoplasmic reticulum
Rrbp1	ribosome binding protein 1	81910	M007364_01	-1.724 ± 1.743	-1.483 ± 0.563	endoplasmic reticulum
Rrbp1	ribosome binding protein 1	81910	M013442_01	-1.497 ± 0.516	-1.137 ± 0.649	endoplasmic reticulum
Shisa5	shisa homolog 5 (Xenopus laevis)	66940	M008829_01	-2.719 ± 0.715	-1.863 ± 0.502	endoplasmic reticulum
Sqle	squalene epoxidase	20775	M003724_01	-0.156 ± 1.289	-1.606 ± 0.575	endoplasmic reticulum
Ssr1	signal sequence receptor, alpha	107513	M011474_01	-1.825 ± 0.403	-1.893 ± 0.622	endoplasmic reticulum
Tmem50b	transmembrane protein 50B	77975	M009000_01	-0.843 ± 0.563	-1.255 ± 0.594	endoplasmic reticulum
Vkorc1	vitamin K epoxide reductase complex, subunit 1	27973	M008914_01	-1.18 ± 0.451	-1.094 ± 0.625	endoplasmic reticulum
Yipf4	Yip1 domain family, member 4	67864	M009955_01	-1.043 ± 0.458	-0.718 ± 0.667	endoplasmic reticulum
1500015O10Rik	RIKEN cDNA 1500015O10 gene	78896	M007319_01	-2.349 ± 0.749	-1.781 ± 0.838	extracellular region
Abo	ABO blood group (transferase A, alpha 1-3-N-acetylgalactosaminyltransferase, transferase B, alpha 1-3-galactosyltransferase)	80908	M012824_01	-1.668 ± 0.825	-0.451 ± 0.787	extracellular region
Adam17	a disintegrin and metallopeptidase domain 17	11491	M004095_01	-1.105 ± 1.293	-0.891 ± 0.449	extracellular region
Adamtsl2	ADAMTS-like 2	77794	M009296_01	-1.629 ± 0.697	-1.241 ± 0.636	extracellular region
Adm	adrenomedullin	11535	M000521_01	-0.18 ± 1.357	-1.584 ± 0.585	extracellular region
Ang	angiogenin, ribonuclease, RNase A family, 5	11727	M000892_01	-0.156 ± 0.935	-1.074 ± 0.967	extracellular region
Aspn	asporin	66695	M008187_01	-2.517 ± 0.327	-1.164 ± 0.634	extracellular region
Bgn	biglycan	12111	M000909_01	-1.423 ± 0.4	-1.577 ± 0.726	extracellular region
C1qa	complement component 1, q subcomponent, alpha polypeptide	12259	M000112_01	-1.26 ± 0.677	-1.296 ± 0.557	extracellular region
C1qc	complement component 1, q subcomponent, C chain	12262	M001215_01	-1.42 ± 0.722	-2.049 ± 0.681	extracellular region
C1qtnf6	C1q and tumor necrosis factor related protein 6	72709	M009465_01	-1.67 ± 0.567	-1.474 ± 0.7	extracellular region
Cbx6	chromobox homolog 6	494448	M013192_01	-1.859 ± 0.508	-1.28 ± 0.532	extracellular region
Ccdc80	coiled-coil domain containing 80	67896	M013215_01	-3.195 ± 0.568	-1.279 ± 0.545	extracellular region
Ccl2	chemokine (C-C motif) ligand 2	20296	M000047_01	-2.492 ± 0.421	-2.17 ± 1.281	extracellular region
Ccl21a	chemokine (C-C motif) ligand 21A	18829	M005884_01	-2.113 ± 0.686	-1.824 ± 0.3	extracellular region
Ccl21b	chemokine (C-C motif) ligand 21B	100042493	M011933_01	-1.558 ± 0.752	-1.086 ± 0.349	extracellular region
Ccl21b	chemokine (C-C motif) ligand 21B	100042493	M007398_01	-1.031 ± 0.65	-1.294 ± 0.379	extracellular region
Ccl24	chemokine (C-C motif) ligand 24	56221	M004562_01	-2.228 ± 0.972	-1.973 ± 0.89	extracellular region
Ccl4	chemokine (C-C motif) ligand 4	20303	M000414_01	-2.177 ± 0.983	-1.472 ± 0.861	extracellular region
Cd163	CD163 antigen	93671	M009118_01	-2.845 ± 0.519	-1.839 ± 0.678	extracellular region
Cfd	complement factor D (adipsin)	11537	M001583_01	-1.34 ± 0.753	-0.894 ± 0.613	extracellular region
Chi3l1	chitinase 3-like 1	12654	M007094_01	-0.977 ± 0.627	-0.941 ± 0.268	extracellular region
Cklf	chemokine-like factor	75458	M010230_01	-1.489 ± 1.012	-1.458 ± 0.501	extracellular region
Col14a1	collagen, type XIV, alpha 1	12818	M004924_01	-3.286 ± 0.954	-3.231 ± 0.626	extracellular region
Col1a2	collagen, type I, alpha 2	12843	M001625_01	-1.22 ± 0.746	-0.845 ± 0.883	extracellular region
Col24a1	collagen, type XXIV, alpha 1	71355	M010594_01	-0.933 ± 0.779	-1.564 ± 0.821	extracellular region
Col3a1	collagen, type III, alpha 1	12825	M001519_01	-2.075 ± 1.046	-1.193 ± 0.672	extracellular region
Col5a2	collagen, type V, alpha 2	12832	M002662_01	-1.847 ± 0.632	-1.185 ± 0.696	extracellular region
Col5a3	collagen, type V, alpha 3	53867	M004539_01	-1.236 ± 0.543	-1.439 ± 0.637	extracellular region
Col6a1	collagen, type VI, alpha 1	12833	M000854_01	-1.346 ± 0.78	-1.554 ± 1.073	extracellular region
Col8a1	collagen, type VIII, alpha 1	12837	M006524_01	-1.863 ± 0.852	-1.983 ± 1.418	extracellular region
Cpxm2	carboxypeptidase X 2 (M14 family)	55987	M002652_01	-1.681 ± 0.584	-0.725 ± 0.535	extracellular region
Crlf2	cytokine receptor-like factor 2	57914	M006414_01	-0.956 ± 0.609	-1.019 ± 0.718	extracellular region
Crlf2	cytokine receptor-like factor 2	57914	M004731_01	-0.703 ± 0.917	-0.982 ± 0.385	extracellular region
Crtap	cartilage associated protein	56693	M003503_01	-1.343 ± 0.634	-1.437 ± 1.848	extracellular region
Ctgf	connective tissue growth factor	14219	M000638_01	-1.752 ± 0.52	-1.312 ± 0.768	extracellular region
Cxcl1	chemokine (C-X-C motif) ligand 1	14825	M003548_01	-2.531 ± 0.965	-2.328 ± 1.38	extracellular region
Cxcl12	chemokine (C-X-C motif) ligand 12	20315	M000143_01	-2.528 ± 0.475	-2.137 ± 0.429	extracellular region
Cxcl2	chemokine (C-X-C motif) ligand 2	20310	M001937_01	-2.875 ± 0.569	-1.779 ± 0.947	extracellular region
Dcn	decorin	13179	M000685_01	-1.914 ± 1.018	-1.727 ± 0.907	extracellular region
Dpt	dermatopontin	56429	M004275_01	-2.077 ± 0.989	-1.329 ± 0.487	extracellular region
Ecm2	extracellular matrix protein 2, female organ and adipocyte specific	407800	M011600_01	-1.096 ± 0.442	-0.925 ± 0.406	extracellular region
Eng	endoglin	13805	M001859_01	-2.626 ± 0.977	-2.077 ± 0.442	extracellular region
Enpp5	ectonucleotide pyrophosphatase/phosphodiesterase 5	83965	M009052_01	-1.449 ± 0.384	-0.714 ± 0.418	extracellular region
Esm1	endothelial cell-specific molecule 1	71690	M009700_01	-3.408 ± 0.874	-2.812 ± 0.717	extracellular region
F13a1	coagulation factor XIII, A1 subunit	74145	M007426_01	-2.786 ± 0.797	-2.363 ± 0.936	extracellular region
Fbln7	fibulin 7	70370	M009121_01	-1.351 ± 0.992	-1.38 ± 1.129	extracellular region
Fbn1	fibrillin 1	14118	M000227_01	-1.832 ± 0.683	-1.504 ± 0.426	extracellular region
Flt3l	FMS-like tyrosine kinase 3 ligand	14256	M006651_01	-1.321 ± 0.693	-0.917 ± 0.553	extracellular region
Fmod	fibromodulin	14264	M004936_01	-1.275 ± 0.485	-1.397 ± 0.942	extracellular region
Fstl1	follistatin-like 1	14314	M003752_01	-3.061 ± 0.647	-2.522 ± 0.491	extracellular region
Gdf15	growth differentiation factor 15	23886	M004558_01	-2.535 ± 0.79	-1.08 ± 0.823	extracellular region
Hic1	hypermethylated in cancer 1	15248	M005557_01	-2.731 ± 0.883	-2.808 ± 0.979	extracellular region
Igfbp1	insulin-like growth factor binding protein 1	16006	M003567_01	-1.327 ± 0.76	-1.451 ± 0.848	extracellular region
Igfbp6	insulin-like growth factor binding protein 6	16012	M003573_01	-3.008 ± 0.295	-2.869 ± 0.648	extracellular region
Igfbp7	insulin-like growth factor binding protein 7	29817	M000158_01	-0.879 ± 1.075	-1.014 ± 0.606	extracellular region
Il17a	interleukin 17A	16171	M002115_01	-1.544 ± 0.57	-0.426 ± 0.861	extracellular region
Il33	interleukin 33	77125	M013299_01	-2.4 ± 1.551	-1.927 ± 0.564	extracellular region
Il6	interleukin 6	16193	M000327_01	-0.111 ± 1.343	-2.754 ± 1.065	extracellular region
Kera	keratocan	16545	M002161_01	-1.36 ± 0.947	-0.864 ± 0.65	extracellular region
Kitl	kit ligand	17311	M001504_01	-3.819 ± 0.306	-3.933 ± 0.558	extracellular region
Lama4	laminin, alpha 4	16775	M000812_01	-1.499 ± 0.824	-1.185 ± 0.674	extracellular region
Lbp	lipopolysaccharide binding protein	16803	M004157_01	-1.093 ± 0.703	-1.047 ± 0.266	extracellular region
Lox	lysyl oxidase	16948	M000056_01	-1.263 ± 0.569	-2.322 ± 0.832	extracellular region
Loxl2	lysyl oxidase-like 2	94352	M007333_01	-0.169 ± 0.616	-1.462 ± 0.446	extracellular region
Loxl3	lysyl oxidase-like 3	16950	M005699_01	-1.668 ± 1.743	-1.552 ± 0.919	extracellular region
Lum	lumican	17022	M003292_01	-3.113 ± 0.492	-2.574 ± 0.603	extracellular region
Matn2	matrilin 2	17181	M001246_01	-1.584 ± 0.554	-1.044 ± 0.462	extracellular region
Mfap4	microfibrillar-associated protein 4	76293	M008845_01	-1.594 ± 1.021	-1.42 ± 0.645	extracellular region
Mgp	matrix Gla protein	17313	M005703_01	-2.312 ± 0.507	-2.586 ± 1.309	extracellular region
Mmp14	matrix metallopeptidase 14 (membrane-inserted)	17387	M003350_01	-1.384 ± 0.88	-1.205 ± 1.094	extracellular region
Mmp1a	matrix metallopeptidase 1a (interstitial collagenase)	83995	M011815_01	-0.18 ± 0.598	-0.976 ± 0.711	extracellular region
Notch4	Notch gene homolog 4 (Drosophila)	18132	M000397_01	-2.341 ± 1.088	-0.964 ± 0.795	extracellular region
Ogn	osteoglycin	18295	M001509_01	-3.124 ± 1.083	-1.201 ± 0.582	extracellular region
Olfm1	olfactomedin 1	56177	M005129_01	-1.722 ± 0.461	-0.434 ± 0.428	extracellular region
Olfml3	olfactomedin-like 3	99543	M008443_01	-1.066 ± 0.625	-1.609 ± 1.04	extracellular region
Pcolce	procollagen C-endopeptidase enhancer protein	18542	M003287_01	-1.422 ± 0.784	-1.091 ± 0.948	extracellular region
Pcolce2	procollagen C-endopeptidase enhancer 2	76477	M010227_01	-3.105 ± 0.884	-2.108 ± 0.874	extracellular region
Pf4	platelet factor 4	56744	M003810_01	-3.122 ± 0.636	-2.876 ± 0.718	extracellular region
Pi16	peptidase inhibitor 16	74116	M009136_01	-1.124 ± 0.302	-0.902 ± 0.423	extracellular region
Pla1a	phospholipase A1 member A	85031	M008003_01	-1.382 ± 1.358	-1.024 ± 0.754	extracellular region
Pla2r1	phospholipase A2 receptor 1	18779	M002018_01	-1.434 ± 1.161	-2.282 ± 0.675	extracellular region
Prdx4	peroxiredoxin 4	53381	M007517_01	-1.096 ± 0.408	-0.888 ± 0.278	extracellular region
Prom1	prominin 1	19126	M002167_01	-1.503 ± 0.605	-1.181 ± 0.868	extracellular region
Ptprz1	protein tyrosine phosphatase, receptor type Z, polypeptide 1	19283	M009895_01	-0.111 ± 0.586	-1.157 ± 0.641	extracellular region
Rarres2	retinoic acid receptor responder (tazarotene induced) 2	71660	M008540_01	-1.679 ± 0.426	-1.17 ± 0.66	extracellular region
Retnla	resistin like alpha	57262	M006396_01	-1.74 ± 0.731	-1.338 ± 0.64	extracellular region
Rnase4	ribonuclease, RNase A family 4	58809	M006427_01	-4.124 ± 1.045	-3.654 ± 1.03	extracellular region
Rs1	retinoschisis (X-linked, juvenile) 1 (human)	20147	M004979_01	-0.089 ± 0.633	-1.118 ± 0.675	extracellular region
Sema3d	sema domain, immunoglobulin domain (Ig), short basic domain, secreted, (semaphorin) 3D	108151	M011080_01	-1.441 ± 1.097	-1.25 ± 1.544	extracellular region
Serpina1c	serine (or cysteine) peptidase inhibitor, clade A, member 1C	20702	M006798_01	-1.189 ± 0.983	-0.905 ± 0.505	extracellular region
Serpinf1	serine (or cysteine) peptidase inhibitor, clade F, member 1	20317	M006653_01	-1.45 ± 0.578	-1.566 ± 0.645	extracellular region
Serping1	serine (or cysteine) peptidase inhibitor, clade G, member 1	12258	M004840_01	-3.039 ± 0.449	-2.218 ± 0.611	extracellular region
Serpinh1	serine (or cysteine) peptidase inhibitor, clade H, member 1	12406	M003742_01	-1.803 ± 0.64	-1.482 ± 0.629	extracellular region
Smoc2	SPARC related modular calcium binding 2	64074	M009060_01	-2.083 ± 0.585	-2.359 ± 0.69	extracellular region
Spata6	spermatogenesis associated 6	67946	M006707_01	-0.195 ± 1.122	-2.013 ± 0.752	extracellular region
Spp2	secreted phosphoprotein 2	75396	M008547_01	-2.577 ± 0.432	-1.688 ± 0.504	extracellular region
Srgn	serglycin	19073	M003654_01	-0.18 ± 1.118	-0.951 ± 1.139	extracellular region
Srpx2	sushi-repeat-containing protein, X-linked 2	68792	M010186_01	-1.077 ± 0.414	-0.838 ± 0.493	extracellular region
Thbs3	thrombospondin 3	21827	M000730_01	-1.775 ± 0.883	-1.258 ± 0.657	extracellular region
Timp1	tissue inhibitor of metalloproteinase 1	21857	M006468_01	-2.287 ± 0.658	-1.795 ± 1.338	extracellular region
Timp1	tissue inhibitor of metalloproteinase 1	21857	M002488_01	-1.443 ± 0.589	-1.477 ± 1.139	extracellular region
Timp3	tissue inhibitor of metalloproteinase 3	21859	M001869_01	-1.07 ± 1.567	-1.817 ± 0.919	extracellular region
Tnfsf12	tumor necrosis factor (ligand) superfamily, member 12	21944	M010501_01	-2.434 ± 1.893	-1.922 ± 0.764	extracellular region
Vcam1	vascular cell adhesion molecule 1	22329	M000328_01	-2.101 ± 0.433	-1.582 ± 0.713	extracellular region
Wif1	Wnt inhibitory factor 1	24117	M004589_01	-3.611 ± 0.713	-3.425 ± 0.517	extracellular region
Wisp2	WNT1 inducible signaling pathway protein 2	22403	M002912_01	-0.512 ± 0.504	-1.074 ± 0.634	extracellular region
Aatk	apoptosis-associated tyrosine kinase	11302	M002261_01	-2.908 ± 0.773	-1.34 ± 0.722	membrane
Abi1	abl-interactor 1	11308	M000212_01	-0.878 ± 0.344	-1.162 ± 0.76	membrane
Actn1	actinin, alpha 1	109711	M007953_01	-1.877 ± 0.687	-1.055 ± 0.361	membrane
Amotl2	angiomotin-like 2	56332	M006731_01	-1.345 ± 0.985	-1.105 ± 0.422	membrane
Ano1	anoctamin 1, calcium activated chloride channel	101772	M008249_01	-1.514 ± 0.542	-1.211 ± 1.006	membrane
Antxr2	anthrax toxin receptor 2	71914	M008098_01	-1.563 ± 0.576	-1.058 ± 0.518	membrane
Anxa1	annexin A1	16952	M007393_01	-3.281 ± 0.939	-3.01 ± 1.173	membrane
App	amyloid beta (A4) precursor protein	11820	M003072_01	-2.128 ± 0.771	-1.331 ± 0.523	membrane
App	amyloid beta (A4) precursor protein	11820	M007395_01	-1.081 ± 0.816	-0.957 ± 0.437	membrane
Appl2	adaptor protein, phosphotyrosine interaction, PH domain and leucine zipper containing 2	216190	M008904_01	-1.057 ± 0.768	-1.026 ± 0.479	membrane
Arf4	ADP-ribosylation factor 4	11843	M000559_01	-2.125 ± 1.176	-0.697 ± 0.629	membrane
Armcx1	armadillo repeat containing, X-linked 1	78248	M009648_01	-1.386 ± 0.875	-1.115 ± 0.726	membrane
Armcx2	armadillo repeat containing, X-linked 2	67416	M008417_01	-1.677 ± 0.488	-0.665 ± 0.728	membrane
Atp2b1	ATPase, Ca++ transporting, plasma membrane 1	67972	M011236_01	-1.381 ± 0.411	-0.501 ± 0.558	membrane
Axl	AXL receptor tyrosine kinase	26362	M001457_01	-1.968 ± 2.007	-1.665 ± 1.115	membrane
B4galt4	UDP-Gal:betaGlcNAc beta 1,4-galactosyltransferase, polypeptide 4	56375	M003862_01	-1.602 ± 1.07	-2.167 ± 0.564	membrane
Bambi	BMP and activin membrane-bound inhibitor, homolog (Xenopus laevis)	68010	M009193_01	-1.426 ± 1.089	-1.78 ± 0.805	membrane
Birc3	baculoviral IAP repeat-containing 3	11796	M000702_01	-0.874 ± 0.575	-2.448 ± 1.09	membrane
C330016O10Rik	RIKEN cDNA C330016O10 gene	212706	M009928_01	-2.072 ± 0.646	-2.492 ± 0.717	membrane
Calcrl	calcitonin receptor-like	54598	M006859_01	-1.901 ± 0.956	-1.238 ± 0.658	membrane
Capns2	calpain, small subunit 2	69543	M009643_01	-1.166 ± 0.606	-1.098 ± 0.788	membrane
Cav2	caveolin 2	12390	M004574_01	-3.405 ± 0.786	-3.716 ± 1.082	membrane
Cd274	CD274 antigen	60533	M006453_01	-1.535 ± 0.687	-1.623 ± 0.777	membrane
Cd55	CD55 antigen	13136	M006862_01	-0.258 ± 0.477	-1.974 ± 0.687	membrane
Cdc42ep3	CDC42 effector protein (Rho GTPase binding) 3	260409	M011510_01	-0.889 ± 0.255	-1.224 ± 0.251	membrane
Chic2	cysteine-rich hydrophobic domain 2	74277	M008329_01	-0.675 ± 0.63	-1.572 ± 0.698	membrane
Chmp5	chromatin modifying protein 5	76959	M007416_01	-0.569 ± 0.283	-1.323 ± 0.355	membrane
Chrnb2	cholinergic receptor, nicotinic, beta polypeptide 2 (neuronal)	11444	M005814_01	-0.671 ± 0.438	-2.838 ± 0.698	membrane
Chst7	carbohydrate (N-acetylglucosamino) sulfotransferase 7	60322	M006446_01	-1.229 ± 0.578	-1.874 ± 1.006	membrane
Clca1	chloride channel calcium activated 1	12722	M003497_01	-1.418 ± 0.757	-1.235 ± 0.377	membrane
Cldn5	claudin 5	12741	M003753_01	-2.211 ± 0.606	-1.8 ± 0.637	membrane
Clec10a	C-type lectin domain family 10, member A	17312	M002367_01	-4.058 ± 0.616	-4.254 ± 0.834	membrane
Clec14a	C-type lectin domain family 14, member a	66864	M010749_01	-2.122 ± 0.822	-2.093 ± 0.843	membrane
Clec4a2	C-type lectin domain family 4, member a2	26888	M010420_01	-2.801 ± 0.457	-1.8 ± 0.73	membrane
Cox6a1	cytochrome c oxidase, subunit VI a, polypeptide 1	12861	M009996_01	-1.832 ± 0.568	-0.432 ± 0.339	membrane
Cox8a	cytochrome c oxidase, subunit VIIIa	12868	M002921_01	-1.708 ± 0.498	-0.514 ± 0.533	membrane
Cxcr4	chemokine (C-X-C motif) receptor 4	12767	M000515_01	-1.229 ± 0.355	-0.838 ± 0.525	membrane
Dtnbp1	dystrobrevin binding protein 1	94245	M009903_01	-1.115 ± 0.807	-0.712 ± 0.375	membrane
Efhd1	EF hand domain containing 1	98363	M007338_01	-1.081 ± 0.763	-1.326 ± 0.427	membrane
Emp3	epithelial membrane protein 3	13732	M003449_01	-1.605 ± 0.517	-0.801 ± 0.824	membrane
Emr1	EGF-like module containing, mucin-like, hormone receptor-like sequence 1	13733	M000772_01	-1.343 ± 0.647	-1.166 ± 0.402	membrane
Epha2	Eph receptor A2	13836	M000899_01	-2.244 ± 0.326	-1.683 ± 0.574	membrane
F11r	F11 receptor	16456	M003502_01	-1.409 ± 1.007	-1.089 ± 0.589	membrane
F2rl1	coagulation factor II (thrombin) receptor-like 1	14063	M000596_01	-2.078 ± 0.758	-2.274 ± 1.412	membrane
Fam188a	family with sequence similarity 188, member A	66960	M009368_01	-1.003 ± 0.718	-1.632 ± 0.487	membrane
Fam18b	family with sequence similarity 18, member B	67510	M007264_01	-1.547 ± 0.484	-1.56 ± 0.712	membrane
Fam198b	family with sequence similarity 198, member B	68659	M009354_01	-1.352 ± 0.386	-1.457 ± 0.759	membrane
Flna	filamin, alpha	192176	M008495_01	-2.18 ± 0.807	-1.787 ± 0.842	membrane
Galntl2	UDP-N-acetyl-alpha-D-galactosamine:polypeptide N-acetylgalactosaminyltransferase-like 2	78754	M009764_01	-0.93 ± 0.864	-1.558 ± 0.684	membrane
Gas1	growth arrest specific 1	14451	M003738_01	-2.743 ± 0.728	-1.62 ± 0.586	membrane
Gatm	glycine amidinotransferase (L-arginine:glycine amidinotransferase)	67092	M008996_01	-1.153 ± 0.554	-1.039 ± 0.592	membrane
Gdi2	guanosine diphosphate (GDP) dissociation inhibitor 2	14569	M003317_01	-1.241 ± 0.643	-0.765 ± 0.739	membrane
Ggta1	glycoprotein galactosyltransferase alpha 1, 3	14594	M000578_01	-1.599 ± 0.868	-1.384 ± 0.733	membrane
Gnai3	guanine nucleotide binding protein (G protein), alpha inhibiting 3	14679	M007810_01	-0.884 ± 0.537	-1.791 ± 0.647	membrane
Gnb1	guanine nucleotide binding protein (G protein), beta 1	14688	M000796_01	-1.379 ± 0.68	-0.746 ± 0.229	membrane
Gng3	guanine nucleotide binding protein (G protein), gamma 3	14704	M004046_01	-0.751 ± 0.64	-1.047 ± 0.817	membrane
Golph3	golgi phosphoprotein 3	66629	M007773_01	-0.73 ± 0.377	-1.626 ± 0.52	membrane
Gpm6b	glycoprotein m6b	14758	M009939_01	-2.109 ± 0.695	-1.736 ± 0.719	membrane
Grasp	GRP1 (general receptor for phosphoinositides 1)-associated scaffold protein	56149	M006188_01	-0.903 ± 0.378	-1.291 ± 0.857	membrane
H2-D1	histocompatibility 2, D region locus 1	14964	M005772_01	-1.14 ± 0.297	-0.85 ± 0.511	membrane
H2-D1	histocompatibility 2, D region locus 1	14964	M006551_01	-1.137 ± 0.406	-1.086 ± 0.678	membrane
H2-gs10	MHC class I like protein GS10	436493	M005300_01	-0.984 ± 0.452	-1.502 ± 1.091	membrane
Has3	hyaluronan synthase 3	15118	M005339_01	-0.833 ± 0.674	-1.226 ± 0.456	membrane
Hcn1	hyperpolarization-activated, cyclic nucleotide-gated K+ 1	15165	M002422_01	-0.111 ± 0.444	-1.588 ± 0.72	membrane
Ier3	immediate early response 3	15937	M003932_01	-1.193 ± 0.99	-2.152 ± 0.554	membrane
Iqgap1	IQ motif containing GTPase activating protein 1	29875	M005270_01	-1.681 ± 1.061	-1.726 ± 0.573	membrane
Itga2b	integrin alpha 2b	16399	M003981_01	-0.884 ± 1.033	-1.063 ± 0.49	membrane
Itm2b	integral membrane protein 2B	16432	M001515_01	-1.589 ± 0.565	-1.808 ± 0.434	membrane
Kcnab1	potassium voltage-gated channel, shaker-related subfamily, beta member 1	16497	M000540_01	-0.944 ± 0.473	-1.295 ± 0.51	membrane
Kcnj8	potassium inwardly-rectifying channel, subfamily J, member 8	16523	M000556_01	-2.282 ± 1.115	-1.582 ± 0.359	membrane
Kcnk5	potassium channel, subfamily K, member 5	16529	M006249_01	-2.861 ± 0.738	-2.783 ± 0.686	membrane
Kdr	kinase insert domain protein receptor	16542	M000087_01	-1.917 ± 0.76	-2.275 ± 1.049	membrane
Klf2	Kruppel-like factor 2 (lung)	16598	M004006_01	-2.584 ± 0.384	-2.001 ± 0.672	membrane
Lat2	linker for activation of T cells family, member 2	56743	M003813_01	-0.976 ± 0.568	-1.339 ± 0.928	membrane
Lin7c	lin-7 homolog C (C. elegans)	22343	M007479_01	-1.057 ± 0.807	-1.061 ± 0.633	membrane
Litaf	LPS-induced TN factor	56722	M003556_01	-0.18 ± 0.776	-0.968 ± 0.753	membrane
LOC100043181	hypothetical protein LOC100043181	100043181	M012698_01	-0.111 ± 1.053	-3.078 ± 0.825	membrane
LOC100044854	similar to chromatin modifying protein 4C	100044854	M008057_01	-1.357 ± 0.656	-0.895 ± 0.549	membrane
Lyn	Yamaguchi sarcoma viral (v-yes-1) oncogene homolog	17096	M000643_01	-1.003 ± 0.772	-1.504 ± 1.11	membrane
Mansc1	MANSC domain containing 1	67729	M010548_01	-0.156 ± 0.385	-1.046 ± 0.804	membrane
Mitd1	MIT, microtubule interacting and transport, domain containing 1	69028	M009127_01	-1.647 ± 0.672	-1.591 ± 0.595	membrane
Ms4a4d	membrane-spanning 4-domains, subfamily A, member 4D	66607	M006980_01	-1.939 ± 1.915	-1.158 ± 0.574	membrane
Ms4a7	membrane-spanning 4-domains, subfamily A, member 7	109225	M013436_01	-1.843 ± 0.698	-1.364 ± 0.393	membrane
Mxra8	matrix-remodelling associated 8	74761	M008733_01	-1.015 ± 0.607	-1.579 ± 0.757	membrane
Myadm	myeloid-associated differentiation marker	50918	M004421_01	-1.152 ± 0.953	-0.878 ± 0.44	membrane
Myct1	myc target 1	68632	M009331_01	-1.05 ± 0.314	-2.985 ± 0.927	membrane
Nbea	neurobeachin	26422	M008185_01	-0.934 ± 0.815	-1.587 ± 0.711	membrane
Npdc1	neural proliferation, differentiation and control gene 1	18146	M000360_01	-1.764 ± 0.593	-0.529 ± 0.392	membrane
Nsg1	neuron specific gene family member 1	18196	M002343_01	-1.21 ± 0.617	-1.444 ± 0.857	membrane
Ntrk2	neurotrophic tyrosine kinase, receptor, type 2	18212	M001406_01	-0.126 ± 1.291	-1.693 ± 1.288	membrane
Nup155	nucleoporin 155	170762	M009176_01	-0.955 ± 0.953	-1.193 ± 0.372	membrane
Osmr	oncostatin M receptor	18414	M002734_01	-1.168 ± 0.455	-1.216 ± 0.489	membrane
P2ry14	purinergic receptor P2Y, G-protein coupled, 14	140795	M009214_01	-1.898 ± 0.467	-1.353 ± 1.192	membrane
Parva	parvin, alpha	57342	M006402_01	-1.307 ± 0.783	-0.806 ± 0.54	membrane
Pcdh1	protocadherin 1	75599	M009565_01	-1.153 ± 0.57	-1.218 ± 0.493	membrane
Pcna	proliferating cell nuclear antigen	18538	M002298_01	-1.482 ± 0.507	-0.414 ± 0.337	membrane
Pdgfrb	platelet derived growth factor receptor, beta polypeptide	18596	M001468_01	-0.18 ± 0.744	-1.23 ± 0.399	membrane
Plekho1	pleckstrin homology domain containing, family O member 1	67220	M008859_01	-1.36 ± 0.696	-1.596 ± 0.614	membrane
Plvap	plasmalemma vesicle associated protein	84094	M009377_01	-2.707 ± 0.72	-1.609 ± 0.763	membrane
Pou3f1	POU domain, class 3, transcription factor 1	18991	M000462_01	-1.567 ± 0.767	-0.741 ± 0.594	membrane
Prpf40b	PRP40 pre-mRNA processing factor 40 homolog B (yeast)	54614	M005960_01	-1.727 ± 0.507	-0.772 ± 0.526	membrane
Prr13	proline rich 13	66151	M008961_01	-1.075 ± 0.338	-1.681 ± 0.686	membrane
Prr13	proline rich 13	66151	M012876_01	-0.7 ± 0.32	-1.627 ± 0.482	membrane
Prx	periaxin	19153	M002626_01	-1.143 ± 0.936	-1.002 ± 0.218	membrane
Ptpra	protein tyrosine phosphatase, receptor type, A	19262	M000173_01	-1.549 ± 0.784	-0.973 ± 0.833	membrane
Ptprc	protein tyrosine phosphatase, receptor type, C	19264	M003624_01	-1.312 ± 1.055	-0.627 ± 0.72	membrane
Ptprd	protein tyrosine phosphatase, receptor type, D	19266	M005823_01	-1.754 ± 0.404	-1.651 ± 0.412	membrane
Ptprg	protein tyrosine phosphatase, receptor type, G	19270	M011240_01	-2.31 ± 0.86	-1.749 ± 0.519	membrane
Qk	quaking	19317	M006665_01	-2.785 ± 0.408	-0.33 ± 0.55	membrane
Rab31	RAB31, member RAS oncogene family	106572	M008812_01	-1.906 ± 0.65	-1.078 ± 0.619	membrane
Rab4b	RAB4B, member RAS oncogene family	19342	M009923_01	-0.779 ± 0.573	-0.787 ± 0.517	membrane
Raet1d	retinoic acid early transcript delta	56554	M006374_01	-0.856 ± 0.65	-1.219 ± 0.919	membrane
Rapgef4	Rap guanine nucleotide exchange factor (GEF) 4	56508	M008511_01	-2.47 ± 0.894	-0.418 ± 0.678	membrane
Reep3	receptor accessory protein 3	28193	M009802_01	-2.272 ± 0.763	-1.511 ± 0.527	membrane
Rgs3	regulator of G-protein signaling 3	50780	M004083_01	-0.995 ± 0.663	-0.894 ± 0.667	membrane
Rhoj	ras homolog gene family, member J	80837	M008369_01	-1.436 ± 0.43	-0.936 ± 0.851	membrane
Scn11a	sodium channel, voltage-gated, type XI, alpha	24046	M005894_01	-1.364 ± 0.667	-1.071 ± 0.54	membrane
Shc1	src homology 2 domain-containing transforming protein C1	20416	M005641_01	-2.269 ± 1.097	-1.176 ± 1.096	membrane
Slc1a5	solute carrier family 1 (neutral amino acid transporter), member 5	20514	M000338_01	-1.382 ± 0.47	-1.045 ± 0.431	membrane
Slc28a2	solute carrier family 28 (sodium-coupled nucleoside transporter), member 2	269346	M004364_01	-0.902 ± 1.062	-1.345 ± 1.464	membrane
Slc29a1	solute carrier family 29 (nucleoside transporters), member 1	63959	M008926_01	-1.699 ± 0.545	-0.478 ± 0.607	membrane
Slc2a9	solute carrier family 2 (facilitated glucose transporter), member 9	117591	M007425_01	-1.3 ± 0.49	-0.896 ± 0.568	membrane
Slc30a5	solute carrier family 30 (zinc transporter), member 5	69048	M004260_01	-0.949 ± 0.845	-1.123 ± 0.72	membrane
Slc7a7	solute carrier family 7 (cationic amino acid transporter, y+ system), member 7	20540	M006325_01	-1.023 ± 0.494	-0.896 ± 0.797	membrane
Slc9a3r2	solute carrier family 9 (sodium/hydrogen exchanger), member 3 regulator 2	65962	M012975_01	-1.277 ± 0.318	-1.084 ± 0.294	membrane
Slco2a1	solute carrier organic anion transporter family, member 2a1	24059	M007960_01	-0.111 ± 0.725	-1.586 ± 0.743	membrane
Slitrk1	SLIT and NTRK-like family, member 1	76965	M007845_01	-1.657 ± 0.877	-1.729 ± 0.595	membrane
Smad3	MAD homolog 3 (Drosophila)	17127	M002325_01	-0.355 ± 0.622	-1.601 ± 0.851	membrane
Smagp	small cell adhesion glycoprotein	207818	M008217_01	-1.624 ± 0.81	-1.028 ± 0.402	membrane
Sox17	SRY-box containing gene 17	20671	M002009_01	-3.915 ± 0.697	-3.916 ± 1.044	membrane
Spna2	spectrin alpha 2	20740	M007463_01	-1.25 ± 0.926	-1.463 ± 0.759	membrane
Sri	sorcin	109552	M008156_01	-1.072 ± 0.47	-0.742 ± 0.37	membrane
St8sia4	ST8 alpha-N-acetyl-neuraminide alpha-2,8-sialyltransferase 4	20452	M002703_01	-0.926 ± 1.049	-1.931 ± 1.591	membrane
Syt9	synaptotagmin IX	60510	M005790_01	-2.074 ± 0.52	-1.831 ± 0.683	membrane
Tbxas1	thromboxane A synthase 1, platelet	21391	M001427_01	-0.169 ± 0.684	-1.074 ± 0.429	membrane
Tes	testis derived transcript	21753	M011064_01	-1.907 ± 0.916	-2.849 ± 1.697	membrane
Tgfb1i1	transforming growth factor beta 1 induced transcript 1	21804	M001131_01	-2.324 ± 0.791	-2.081 ± 0.617	membrane
Tjp1	tight junction protein 1	21872	M001548_01	-2.954 ± 0.43	-2.337 ± 0.553	membrane
Tm4sf1	transmembrane 4 superfamily member 1	17112	M000259_01	-3.532 ± 1.262	-3.296 ± 1.388	membrane
Tmem14c	transmembrane protein 14C	66154	M009009_01	-0.84 ± 1.14	-1.235 ± 1.062	membrane
Tmem191c	transmembrane protein 191C	224019	M007939_01	-0.902 ± 1.186	-1.098 ± 0.645	membrane
Tmem213	transmembrane protein 213	77522	M009487_01	-0.857 ± 1.075	-1.268 ± 0.468	membrane
Tmem216	transmembrane protein 216	68642	M009160_01	-1.521 ± 0.417	-0.6 ± 0.663	membrane
Tmem51	transmembrane protein 51	214359	M008391_01	-1.451 ± 1.047	-1.219 ± 0.495	membrane
Tmem88	transmembrane protein 88	67020	M009846_01	-1.231 ± 0.679	-1.024 ± 0.367	membrane
Tmigd1	transmembrane and immunoglobulin domain containing 1	66601	M008126_01	-0.195 ± 0.641	-0.951 ± 0.341	membrane
Tnmd	tenomodulin	64103	M010299_01	-3.283 ± 0.562	-3.172 ± 1.059	membrane
Tomm6	translocase of outer mitochondrial membrane 6 homolog (yeast)	66119	M013090_01	-1.537 ± 0.432	-0.804 ± 0.627	membrane
Tpst1	protein-tyrosine sulfotransferase 1	22021	M003104_01	-1.956 ± 0.673	-1.938 ± 0.644	membrane
Tspan2	tetraspanin 2	70747	M012693_01	-1.314 ± 0.654	-1.28 ± 0.716	membrane
Tspan2	tetraspanin 2	70747	M008370_01	-0.959 ± 0.707	-0.965 ± 0.653	membrane
Tspan5	tetraspanin 5	56224	M004575_01	-0.405 ± 0.895	-1.34 ± 0.505	membrane
Ttyh1	tweety homolog 1 (Drosophila)	57776	M012428_01	-1.856 ± 0.5	-0.711 ± 0.756	membrane
Unc5b	unc-5 homolog B (C. elegans)	107449	M008971_01	-1.75 ± 1.886	-1.917 ± 0.633	membrane
Vmn2r37	vomeronasal 2, receptor 37	22305	M003009_01	-0.18 ± 0.577	-1.457 ± 0.822	membrane
Vnn1	vanin 1	22361	M004023_01	-1.342 ± 0.661	-1.664 ± 0.75	membrane
Zic2	zinc finger protein of the cerebellum 2	22772	M001984_01	-1.1 ± 0.531	-0.774 ± 0.513	membrane
1110035H17Rik	RIKEN cDNA 1110035H17 gene	68686	M006981_01	-0.162 ± 0.654	-1.751 ± 1.121
1700012A03Rik	RIKEN cDNA 1700012A03 gene	76382	M007895_01	-1.936 ± 0.599	-1.343 ± 0.785
1700024P04Rik	RIKEN cDNA 1700024P04 gene	69382	M010159_01	-0.156 ± 0.591	-0.996 ± 0.888
1700080O16Rik	RIKEN cDNA 1700080O16 gene	74279	M012374_01	-0.074 ± 0.753	-1.161 ± 1.096
1810011O10Rik	RIKEN cDNA 1810011O10 gene	69068	M008188_01	-3.195 ± 0.494	-2.174 ± 0.605
2410002F23Rik	RIKEN cDNA 2410002F23 gene	668661	M007007_01	-1.532 ± 0.828	-0.592 ± 0.631
2610034B18Rik	RIKEN cDNA 2610034B18 gene	70420	M009398_01	-1.627 ± 0.579	-1.128 ± 0.441
2610305D13Rik	RIKEN cDNA 2610305D13 gene	112422	M009761_01	-0.853 ± 0.915	-1.238 ± 0.717
3110003A17Rik	RIKEN cDNA 3110003A17 gene	73112	M008524_01	-2.587 ± 0.559	-2.316 ± 0.765
4632434I11Rik	RIKEN cDNA 4632434I11 gene	74041	M008224_01	-0.195 ± 1.564	-0.712 ± 0.454
4930556J24Rik	RIKEN cDNA 4930556J24 gene	75342	M012522_01	-1.292 ± 0.984	-1.384 ± 1.08
4933407C03Rik	RIKEN cDNA 4933407C03 gene	74440	M012996_01	-1.326 ± 0.407	-1.577 ± 0.751
6330406I15Rik	RIKEN cDNA 6330406I15 gene	70717	M010598_01	-1.077 ± 0.61	-0.763 ± 0.424
Acly	ATP citrate lyase	104112	M008151_01	-1.201 ± 0.82	-1.624 ± 0.525
Actb	actin, beta	11461	M005990_01	-0.921 ± 0.888	-0.957 ± 0.811
Actn4	actinin alpha 4	60595	M006833_01	-1.052 ± 0.316	-0.799 ± 0.457
Ahr	aryl-hydrocarbon receptor	11622	M001609_01	-1.462 ± 1.429	-0.608 ± 0.91
Aldh3b1	aldehyde dehydrogenase 3 family, member B1	67689	M010423_01	-1.451 ± 0.843	-1.297 ± 0.388
Anxa5	annexin A5	11747	M000600_01	-2.057 ± 0.893	-0.862 ± 0.635
Arf3	ADP-ribosylation factor 3	11842	M009099_01	-1.279 ± 0.853	-1.185 ± 0.714
Arpc5	actin related protein 2/3 complex, subunit 5	67771	M008960_01	-2.172 ± 0.644	-1.618 ± 0.284
Atpbd4	ATP binding domain 4	66632	M011336_01	-1.105 ± 0.5	-1.054 ± 0.377
Azin1	antizyme inhibitor 1	54375	M002249_01	-1.166 ± 0.631	-0.988 ± 0.469
Bace2	beta-site APP-cleaving enzyme 2	56175	M004158_01	-1.62 ± 0.649	-0.888 ± 0.765
Batf3	basic leucine zipper transcription factor, ATF-like 3	381319	M007187_01	-1.326 ± 1.28	-1.132 ± 1.21
Bicc1	bicaudal C homolog 1 (Drosophila)	83675	M010238_01	-0.169 ± 0.637	-0.572 ± 0.653
Car8	carbonic anhydrase 8	12319	M000466_01	-2.789 ± 1.392	-2.254 ± 0.525
Ccnb1	cyclin B1	268697	M003701_01	-1.293 ± 0.929	-0.677 ± 0.475
Ccnl2	cyclin L2	56036	M007366_01	-1.5 ± 0.504	-0.594 ± 0.529
Ccrn4l	CCR4 carbon catabolite repression 4-like (S. cerevisiae)	12457	M006779_01	-1.322 ± 0.75	-0.985 ± 0.834
Cdkn3	cyclin-dependent kinase inhibitor 3	72391	M008317_01	-1.304 ± 0.911	-1.724 ± 0.803
Cdo1	cysteine dioxygenase 1, cytosolic	12583	M009004_01	-1.866 ± 0.959	-1.341 ± 0.597
Cep192	centrosomal protein 192	70799	M009128_01	-0.156 ± 0.507	-1.261 ± 0.923
Cnn3	calponin 3, acidic	71994	M007742_01	-2.515 ± 0.945	-1.559 ± 0.28
Col20a1	collagen, type XX, alpha 1	73368	M011803_01	-0.764 ± 0.673	-1.393 ± 0.568
Col6a3	collagen, type VI, alpha 3	12835	M002365_01	-1.862 ± 0.885	-1.186 ± 0.787
Cramp1l	Crm, cramped-like (Drosophila)	57354	M011343_01	-0.169 ± 0.988	-1.276 ± 0.506
Ctla2b	cytotoxic T lymphocyte-associated protein 2 beta	13025	M003744_01	-1.653 ± 0.724	-1.064 ± 1.343
Cugbp2	CUG triplet repeat, RNA binding protein 2	14007	M004119_01	-0.363 ± 0.371	-2.379 ± 0.6
Dact1	dapper homolog 1, antagonist of beta-catenin (xenopus)	59036	M005227_01	-1.947 ± 0.879	-1.679 ± 1.265
Dck	deoxycytidine kinase	13178	M001212_01	-1.108 ± 0.574	-1.23 ± 0.683
Ddit4	DNA-damage-inducible transcript 4	74747	M007688_01	-1.011 ± 0.571	-0.886 ± 0.498
Dlg3	discs, large homolog 3 (Drosophila)	53310	M001700_01	-1.38 ± 0.353	-1.318 ± 0.393
Dock7	dedicator of cytokinesis 7	67299	M007468_01	-2.171 ± 0.538	-0.896 ± 0.453
Dstn	destrin	56431	M004271_01	-2.279 ± 0.467	-1.716 ± 0.448
Dusp1	dual specificity phosphatase 1	19252	M000814_01	-0.966 ± 0.571	-0.915 ± 0.496
Dusp12	dual specificity phosphatase 12	80915	M009408_01	-1.278 ± 0.701	-1.45 ± 1.431
Dusp22	dual specificity phosphatase 22	105352	M010305_01	-0.783 ± 0.335	-1.09 ± 0.433
Dusp6	dual specificity phosphatase 6	67603	M006962_01	-1.345 ± 1.08	-1.229 ± 0.773
Ect2	ect2 oncogene	13605	M006838_01	-0.846 ± 0.833	-1.148 ± 1.028
Efhc1	EF-hand domain (C-terminal) containing 1	71877	M008790_01	-1.28 ± 0.526	-1.452 ± 0.935
Efhd2	EF hand domain containing 2	27984	M007451_01	-1.846 ± 0.726	-1.838 ± 0.666
Elavl3	ELAV (embryonic lethal, abnormal vision, Drosophila)-like 3 (Hu antigen C)	15571	M001227_01	-1.185 ± 0.356	-1.417 ± 0.78
Elmo2	engulfment and cell motility 2, ced-12 homolog (C. elegans)	140579	M009486_01	-1.195 ± 0.533	-1.461 ± 0.539
Eri2	exoribonuclease 2	71151	M010585_01	-1.674 ± 0.518	-1.697 ± 0.904
Etv1	ets variant gene 1	14009	M001866_01	-1.729 ± 0.364	-1.469 ± 0.662
Fabp7	fatty acid binding protein 7, brain	12140	M001287_01	-1.341 ± 0.433	-0.925 ± 0.656
Fam101b	family with sequence similarity 101, member B	76566	M009380_01	-1.338 ± 0.433	-1.113 ± 0.759
Fam32a	family with sequence similarity 32, member A	67922	M008567_01	-1.079 ± 0.612	-0.701 ± 0.632
Fbxo3	F-box protein 3	57443	M006407_01	-1.173 ± 0.611	-0.762 ± 0.311
Fndc1	fibronectin type III domain containing 1	68655	M007178_01	-1.215 ± 0.352	-1.275 ± 0.758
Gatsl3	GATS protein-like 3	71962	M007231_01	-0.169 ± 0.58	-1.714 ± 0.752
Gbp3	guanylate binding protein 3	55932	M000662_01	-1.244 ± 0.582	-1.831 ± 0.834
Gfer	growth factor, erv1 (S. cerevisiae)-like (augmenter of liver regeneration)	11692	M006743_01	-1.669 ± 0.435	-0.679 ± 0.735
Gltp	glycolipid transfer protein	56356	M003764_01	-1.235 ± 0.741	-1.448 ± 1.133
Gmcl1	germ cell-less homolog 1 (Drosophila)	23885	M005595_01	-1.22 ± 0.88	-1.311 ± 0.44
Gmeb1	glucocorticoid modulatory element binding protein 1	56809	M005972_01	-2.078 ± 0.94	-0.861 ± 1.573
Gmfb	glia maturation factor, beta	63985	M010992_01	-0.916 ± 1.139	-2.038 ± 0.665
Gmpr2	guanosine monophosphate reductase 2	105446	M008830_01	-1.342 ± 0.532	-1.343 ± 0.346
Gnpda2	glucosamine-6-phosphate deaminase 2	67980	M009340_01	-1.543 ± 0.776	-1.303 ± 0.594
Gpcpd1	glycerophosphocholine phosphodiesterase GDE1 homolog (S. cerevisiae)	74182	M010249_01	-1.523 ± 0.811	-1.728 ± 1.006
Gpcpd1	glycerophosphocholine phosphodiesterase GDE1 homolog (S. cerevisiae)	74182	M008667_01	-0.967 ± 0.734	-1.525 ± 0.701
Gucy1a3	guanylate cyclase 1, soluble, alpha 3	60596	M006455_01	-1.134 ± 0.405	-0.85 ± 0.679
Gucy1b3	guanylate cyclase 1, soluble, beta 3	54195	M002571_01	-2.182 ± 0.783	-1.668 ± 0.327
Gulp1	GULP, engulfment adaptor PTB domain containing 1	70676	M011416_01	-2.331 ± 1.109	-2.244 ± 0.905
H2-Q5	histocompatibility 2, Q region locus 5	15016	M006329_01	-1.473 ± 0.462	-1.458 ± 0.394
Hao1	hydroxyacid oxidase 1, liver	15112	M003980_01	-0.493 ± 0.844	-1.386 ± 0.839
Hba-a2	hemoglobin alpha, adult chain 2	110257	M013135_01	-0.973 ± 1.28	-1.2 ± 0.504
Hbb-b1	hemoglobin, beta adult major chain	15129	M006659_01	-3.096 ± 0.923	-2.402 ± 0.599
Hhex	hematopoietically expressed homeobox	15242	M004606_01	-1.398 ± 0.788	-1.609 ± 1.607
Hif1a	hypoxia inducible factor 1, alpha subunit	15251	M006839_01	-2.685 ± 0.474	-2.125 ± 0.385
Hmgn3	high mobility group nucleosomal binding domain 3	94353	M009341_01	-0.169 ± 0.939	-1.191 ± 0.582
Hnrnpk	heterogeneous nuclear ribonucleoprotein K	15387	M011575_01	-1.143 ± 0.625	-0.699 ± 0.456
Hoxb7	homeobox B7	15415	M001840_01	-1.263 ± 0.491	-1.696 ± 0.698
Hunk	hormonally upregulated Neu-associated kinase	26559	M003904_01	-1.158 ± 0.421	-1.056 ± 0.794
Id1	inhibitor of DNA binding 1	15901	M000135_01	-2.755 ± 0.429	-2.175 ± 0.752
Id4	inhibitor of DNA binding 4	15904	M004180_01	-1.224 ± 0.716	-1.285 ± 0.349
Ifi27l2a	interferon, alpha-inducible protein 27 like 2A	76933	M010328_01	-2.684 ± 1.55	-2.013 ± 0.533
Ifi44	interferon-induced protein 44	99899	M009124_01	-1.237 ± 0.506	-0.885 ± 0.516
Ifih1	interferon induced with helicase C domain 1	71586	M007666_01	-1.824 ± 0.737	-1.777 ± 0.676
Ifit2	interferon-induced protein with tetratricopeptide repeats 2	15958	M000707_01	-2.632 ± 0.508	-1.229 ± 1.088
Ing3	inhibitor of growth family, member 3	71777	M009735_01	-1.365 ± 0.732	-1.012 ± 0.596
Jdp2	Jun dimerization protein 2	81703	M011247_01	-1.724 ± 0.485	-1.412 ± 0.612
Jund	Jun proto-oncogene related gene d	16478	M000372_01	-1.505 ± 0.616	-0.495 ± 0.448
Kank3	KN motif and ankyrin repeat domains 3	80880	M004299_01	-1.289 ± 0.811	-1.354 ± 0.684
Klf4	Kruppel-like factor 4 (gut)	16600	M001542_01	-1.454 ± 0.59	-0.739 ± 0.579
Klk9	kallikrein related-peptidase 9	101533	M012337_01	-0.167 ± 0.566	-1.807 ± 0.898
LOC100044068	similar to interferon-inducible Ifi202b	100044068	M005903_01	-1.741 ± 0.579	-1.328 ± 0.667
LOC100044927	similar to TNF-stimulated gene 6 protein	100044927	M001244_01	-3.29 ± 0.943	-2.832 ± 1.75
LOC100045085	similar to Anxa3	100045085	M002304_01	-2.338 ± 0.828	-1.787 ± 0.664
LOC100045923	similar to DEAD (Asp-Glu-Ala-Asp) box polypeptide 3, Y-linked	100045923	M006724_01	-1.041 ± 0.465	-1.738 ± 0.565
LOC100047211	similar to thymosin beta-4	100047211	M006345_01	-2.822 ± 1.744	-2.613 ± 0.899
LOC676689	similar to H-2 class I histocompatibility antigen, L-D alpha chain precursor	676689	M005301_01	-0.835 ± 0.366	-1.549 ± 0.618
Mab21l1	mab-21-like 1 (C. elegans)	17116	M005876_01	-2.079 ± 0.557	-1.032 ± 0.627
Map4k3	mitogen-activated protein kinase kinase kinase kinase 3	225028	M008883_01	-1.164 ± 0.502	-1.012 ± 0.327
Mapk3	mitogen-activated protein kinase 3	26417	M002497_01	-1.042 ± 0.276	-1.095 ± 0.507
Mcm4	minichromosome maintenance deficient 4 homolog (S. cerevisiae)	17217	M000564_01	-1.322 ± 0.466	-0.925 ± 0.554
Mgat5	mannoside acetylglucosaminyltransferase 5	107895	M009664_01	-1.218 ± 0.822	-1.325 ± 0.646
Mrp63	mitochondrial ribosomal protein 63	67840	M009063_01	-1.567 ± 0.843	-0.655 ± 0.626
Myl12b	myosin, light chain 12B, regulatory	67938	M013115_01	-1.193 ± 0.595	-0.792 ± 0.606
Myo1b	myosin IB	17912	M001182_01	-1.102 ± 0.415	-1.162 ± 0.63
Ndrg1	N-myc downstream regulated gene 1	17988	M001428_01	-1.227 ± 0.696	-1.02 ± 0.613
Nipsnap3a	nipsnap homolog 3A (C. elegans)	73398	M007898_01	-0.856 ± 0.477	-0.888 ± 0.481
Nnmt	nicotinamide N-methyltransferase	18113	M002494_01	-1.71 ± 0.544	-1.135 ± 0.356
Nradd	neurotrophin receptor associated death domain	67169	M010390_01	-1.261 ± 0.709	-0.605 ± 0.438
Nrarp	Notch-regulated ankyrin repeat protein	67122	M010371_01	-1.308 ± 0.382	-1.17 ± 0.76
Nub1	negative regulator of ubiquitin-like proteins 1	53312	M002124_01	-1.552 ± 0.57	-0.909 ± 0.343
Nxf7	nuclear RNA export factor 7	170722	M011229_01	-0.994 ± 0.566	-1.04 ± 0.435
Pan3	PAN3 polyA specific ribonuclease subunit homolog (S. cerevisiae)	72587	M010839_01	-1.133 ± 0.433	-0.921 ± 0.605
Pck2	phosphoenolpyruvate carboxykinase 2 (mitochondrial)	74551	M008957_01	-2.119 ± 0.727	-1.035 ± 0.659
Pds5a	PDS5, regulator of cohesion maintenance, homolog A (S. cerevisiae)	71521	M011443_01	-2.361 ± 1.957	-1.734 ± 0.804
Pfkfb2	6-phosphofructo-2-kinase/fructose-2,6-biphosphatase 2	18640	M009594_01	-0.861 ± 0.456	-1.101 ± 0.374
Pgam1	phosphoglycerate mutase 1	18648	M007413_01	-1.618 ± 0.436	-0.44 ± 0.551
Plagl1	pleiomorphic adenoma gene-like 1	22634	M005082_01	-1.451 ± 0.673	-1.684 ± 0.49
Polm	polymerase (DNA directed), mu	54125	M001166_01	-1.935 ± 0.554	-2.702 ± 0.534
Ppic	peptidylprolyl isomerase C	19038	M001684_01	-1.23 ± 0.542	-1.276 ± 0.36
Ppp2r2b	protein phosphatase 2 (formerly 2A), regulatory subunit B (PR 52), beta isoform	72930	M011640_01	-1.285 ± 1.426	-2.035 ± 1.137
Prg4	proteoglycan 4 (megakaryocyte stimulating factor, articular superficial zone protein)	96875	M004792_01	-2.256 ± 0.646	-2.086 ± 0.605
Prkra	protein kinase, interferon inducible double stranded RNA dependent activator	23992	M005610_01	-1.338 ± 0.745	-0.658 ± 0.499
Ptbp1	polypyrimidine tract binding protein 1	19205	M003315_01	-1.191 ± 0.776	-0.89 ± 0.341
Ptpn9	protein tyrosine phosphatase, non-receptor type 9	56294	M002238_01	-1.547 ± 0.787	-1.124 ± 0.491
Purb	purine rich element binding protein B	19291	M009144_01	-0.727 ± 0.362	-1.171 ± 0.318
Rab32	RAB32, member RAS oncogene family	67844	M009180_01	-1.099 ± 0.692	-1.473 ± 0.693
Rab34	RAB34, member of RAS oncogene family	19376	M008721_01	-1.052 ± 0.555	-0.869 ± 0.363
Rad1	RAD1 homolog (S. pombe)	19355	M004809_01	-0.795 ± 0.386	-1.035 ± 0.334
Rassf8	Ras association (RalGDS/AF-6) domain family (N-terminal) member 8	71323	M008066_01	-1.404 ± 0.53	-1.262 ± 0.746
Rbl1	retinoblastoma-like 1 (p107)	19650	M001046_01	-0.712 ± 0.696	-1.744 ± 0.646
Rbmx	RNA binding motif protein, X chromosome	19655	M004188_01	-1.092 ± 0.479	-1.016 ± 0.55
Rbp7	retinol binding protein 7, cellular	63954	M010231_01	-1.03 ± 1.006	-0.757 ± 0.854
Rbpms2	RNA binding protein with multiple splicing 2	71973	M008783_01	-2.002 ± 0.884	-0.849 ± 0.725
Rgs2	regulator of G-protein signaling 2	19735	M004185_01	-1.621 ± 0.337	-0.697 ± 0.668
Rgs5	regulator of G-protein signaling 5	19737	M009896_01	-1.874 ± 0.803	-1.586 ± 0.672
Rin2	Ras and Rab interactor 2	74030	M007030_01	-1.919 ± 0.649	-1.163 ± 0.819
S100a11	S100 calcium binding protein A11 (calgizzarin)	20195	M013053_01	-1.667 ± 0.952	-1.494 ± 0.557
S100a6	S100 calcium binding protein A6 (calcyclin)	20200	M000388_01	-2.772 ± 0.929	-2.111 ± 0.68
Sepn1	selenoprotein N, 1	74777	M008934_01	-0.726 ± 0.735	-1.154 ± 0.503
Sfrs9	splicing factor, arginine/serine rich 9	108014	M008848_01	-1.405 ± 0.363	-0.671 ± 0.614
Sh3bgrl	SH3-binding domain glutamic acid-rich protein like	56726	M003581_01	-1.455 ± 0.678	-0.809 ± 0.908
Ski	ski sarcoma viral oncogene homolog (avian)	20481	M011681_01	-0.879 ± 0.26	-1.243 ± 0.514
Snrnp70	small nuclear ribonucleoprotein 70 (U1)	20637	M009469_01	-1.201 ± 0.72	-1.065 ± 0.515
Socs1	suppressor of cytokine signaling 1	12703	M000040_01	-0.901 ± 0.821	-1.636 ± 0.438
Socs3	suppressor of cytokine signaling 3	12702	M001222_01	-2.331 ± 0.55	-0.418 ± 0.384
Sox7	SRY-box containing gene 7	20680	M005063_01	-2.388 ± 0.882	-2.285 ± 0.609
Ssbp1	single-stranded DNA binding protein 1	381760	M007173_01	-0.758 ± 0.57	-0.972 ± 0.534
Stmn4	stathmin-like 4	56471	M004710_01	-1.782 ± 0.58	-0.53 ± 0.759
Tagln	transgelin	21345	M000691_01	-2.3 ± 0.94	-0.987 ± 0.929
Tcf15	transcription factor 15	21407	M001346_01	-3.491 ± 0.527	-4.155 ± 0.693
Tcf4	transcription factor 4	21413	M001517_01	-1.729 ± 0.753	-1.052 ± 0.326
Tktl1	transketolase-like 1	83553	M008120_01	-0.195 ± 0.496	-0.787 ± 0.301
Tmod3	tropomodulin 3	50875	M004815_01	-2.775 ± 0.574	-2.68 ± 1.273
Triap1	TP53 regulated inhibitor of apoptosis 1	69076	M008473_01	-1.046 ± 0.426	-0.896 ± 0.281
Trove2	TROVE domain family, member 2	20822	M006764_01	-0.817 ± 0.546	-1.21 ± 0.689
Trub1	TruB pseudouridine (psi) synthase homolog 1 (E. coli)	72133	M012649_01	-2.037 ± 0.844	-1.327 ± 0.961
Tsc22d1	TSC22 domain family, member 1	21807	M003521_01	-1.274 ± 0.638	-1.185 ± 0.541
Ttc25	tetratricopeptide repeat domain 25	74407	M009186_01	-2.273 ± 0.931	-2.142 ± 0.553
Ttpal	tocopherol (alpha) transfer protein-like	76080	M011095_01	-0.111 ± 0.678	-0.696 ± 0.521
Tuba1b	tubulin, alpha 1B	22143	M001685_01	-1.447 ± 0.496	-1.128 ± 0.816
Tubb2b	tubulin, beta 2B	73710	M009162_01	-1.372 ± 0.708	-0.967 ± 0.578
Ube2w	ubiquitin-conjugating enzyme E2W (putative)	66799	M007525_01	-1.058 ± 0.722	-1.026 ± 0.394
Ugdh	UDP-glucose dehydrogenase	22235	M002708_01	-1.482 ± 1.225	-1.785 ± 0.973
Ulk3	unc-51-like kinase 3 (C. elegans)	71742	M011790_01	-1.358 ± 0.873	-0.942 ± 0.637
Unk	unkempt homolog (Drosophila)	217331	M009495_01	-1.323 ± 1.084	-0.846 ± 0.311
Unkl	unkempt-like (Drosophila)	74154	M009682_01	-1.568 ± 0.576	-1.061 ± 0.543
Wsb1	WD repeat and SOCS box-containing 1	78889	M004244_01	-1.314 ± 1.714	-1.569 ± 1.023
Zim1	zinc finger, imprinted 1	22776	M006806_01	-0.744 ± 1.204	-1.044 ± 0.933

## Sheet: All negatives
Gene Ontology enrichment performed with the Gene Ontology Tree Machine tool (GOTM, http://bioinfo.vanderbilt.edu/gotm)
cellular component----extracellular region----GO:0005576
C=1193;O=325;E=267.39;R=1.22;rawP=1.48e-05;adjP=0.0009
12406		ENSMUSG00000070436	12406	Serpinh1	Serpin H1 Precursor (Collagen-binding protein)(Colligin)(47 kDa heat shock protein)(Serine protease inhibitor J6) [Source:UniProtKB/Swiss-Prot;Acc:P19324]
12259		ENSMUSG00000036887	12259	C1qa	Complement C1q subcomponent subunit A Precursor [Source:UniProtKB/Swiss-Prot;Acc:P98086]
11423		ENSMUSG00000023328	11423	Ache	Acetylcholinesterase Precursor (AChE)(EC 3.1.1.7) [Source:UniProtKB/Swiss-Prot;Acc:P21836]
20255		ENSMUSG00000032181	20255	Scg3	Secretogranin-3 Precursor (Secretogranin III)(SgIII) [Source:UniProtKB/Swiss-Prot;Acc:P47867]
12991		ENSMUSG00000063157	12991	Csn2	Beta-casein Precursor [Source:UniProtKB/Swiss-Prot;Acc:P10598]
73244		ENSMUSG00000019756	73244	Prl8a1	prolactin family 8, subfamily a, member 1 [Source:RefSeq peptide;Acc:NP_082753]
67445		ENSMUSG00000040794	67445	C1qtnf4	Complement C1q tumor necrosis factor-related protein 4 Precursor [Source:UniProtKB/Swiss-Prot;Acc:Q8R066]
14256		ENSMUSG00000074129	14256	Flt3l	SL cytokine Precursor (Fms-related tyrosine kinase 3 ligand)(Flt3 ligand)(Flt3L) [Source:UniProtKB/Swiss-Prot;Acc:P49772]
21859		ENSMUSG00000020044	21859	Timp3	Metalloproteinase inhibitor 3 Precursor (Tissue inhibitor of metalloproteinases 3)(TIMP-3) [Source:UniProtKB/Swiss-Prot;Acc:P39876]
50498		ENSMUSG00000003206	50498	Ebi3	Interleukin-27 subunit beta Precursor (IL-27 subunit beta)(IL-27B)(Epstein-Barr virus-induced gene 3 protein homolog) [Source:UniProtKB/Swiss-Prot;Acc:O35228]
407800		ENSMUSG00000043631	407800	Ecm2	Extracellular matrix protein 2 Precursor (Tenonectin) [Source:UniProtKB/Swiss-Prot;Acc:Q5FW85]
20702		ENSMUSG00000079015	20702	Serpina1c	Alpha-1-antitrypsin 1-3 Precursor (Serine protease inhibitor 1-3)(Serine protease inhibitor A1c)(Alpha-1 protease inhibitor 3)(Alpha-1-antitrypsin 1-6)(Serine protease inhibitor 1-6)(Alpha-1 protease inhibitor 6) [Source:UniProtKB/Swiss-Prot;Acc:Q00896]
12258		ENSMUSG00000023224	12258	Serping1	Plasma protease C1 inhibitor Precursor (C1 Inh)(C1Inh)(C1 esterase inhibitor)(C1-inhibiting factor) [Source:UniProtKB/Swiss-Prot;Acc:P97290]
20347		ENSMUSG00000057969	20347	Sema3b	Semaphorin-3B Precursor (Semaphorin-A)(Sema A) [Source:UniProtKB/Swiss-Prot;Acc:Q62177]
21944		ENSMUSG00000018752	69583 21944 619441	Tnfsf12	Tumor necrosis factor ligand superfamily member 12 (TNF-related weak inducer of apoptosis)(TWEAK) [Contains Tumor necrosis factor ligand superfamily member 12, membrane form;Tumor necrosis factor ligand superfamily member 12, secreted form] [Source:UniProtKB/Swiss-Prot;Acc:O54907]
20377		ENSMUSG00000031548	20377	Sfrp1	Secreted frizzled-related protein 1 Precursor (sFRP-1) [Source:UniProtKB/Swiss-Prot;Acc:Q8C4U3]
16545		ENSMUSG00000019932	16545	Kera	Keratocan Precursor (KTN)(Keratan sulfate proteoglycan keratocan) [Source:UniProtKB/Swiss-Prot;Acc:O35367]
17840		ENSMUSG00000073839	17840	RP24-87D8.2	Major urinary protein 1 Precursor (MUP 1) [Source:UniProtKB/Swiss-Prot;Acc:P11588]
12262		ENSMUSG00000036896	12262	C1qc	Complement C1q subcomponent subunit C Precursor [Source:UniProtKB/Swiss-Prot;Acc:Q02105]
67701		ENSMUSG00000017723	67701	Wfdc2	WAP four-disulfide core domain protein 2 Precursor (WAP domain-containing protein HE4) [Source:UniProtKB/Swiss-Prot;Acc:Q9DAU7]
20855		ENSMUSG00000014813	20855	Stc1	Stanniocalcin-1 Precursor (STC-1) [Source:UniProtKB/Swiss-Prot;Acc:O55183]
19711		ENSMUSG00000033061	19711	Resp18	Regulated endocrine-specific protein 18 Precursor [Contains Regulated endocrine-specific protein 18;Triskadecapeptide] [Source:UniProtKB/Swiss-Prot;Acc:P47939]
330260		ENSMUSG00000032667	330260	Pon2	Serum paraoxonase/arylesterase 2 (PON 2)(EC 3.1.1.2)(EC 3.1.8.1)(Serum aryldialkylphosphatase 2)(A-esterase 2)(Aromatic esterase 2) [Source:UniProtKB/Swiss-Prot;Acc:Q62086]
56693		ENSMUSG00000032431	56693	Crtap	Cartilage-associated protein Precursor [Source:UniProtKB/Swiss-Prot;Acc:Q9CYD3]
56221		ENSMUSG00000004814	56221	Ccl24	C-C motif chemokine 24 Precursor (Small-inducible cytokine A24)(Eosinophil chemotactic protein 2)(Eotaxin-2) [Source:UniProtKB/Swiss-Prot;Acc:Q9JKC0]
12845		ENSMUSG00000031849	12845	Comp	Cartilage oligomeric matrix protein Precursor (COMP) [Source:UniProtKB/Swiss-Prot;Acc:Q9R0G6]
14026		ENSMUSG00000021262	100047333 14026	Evl	Ena/VASP-like protein (Ena/vasodilator-stimulated phosphoprotein-like) [Source:UniProtKB/Swiss-Prot;Acc:P70429]
20147		ENSMUSG00000031293	20147	Rs1	Retinoschisin Precursor (X-linked juvenile retinoschisis protein homolog) [Source:UniProtKB/Swiss-Prot;Acc:Q9Z1L4]
83961		ENSMUSG00000032311	83961	Nrg4	Pro-neuregulin-4, membrane-bound isoform (Pro-NRG4) [Contains Neuregulin-4(NRG-4)] [Source:UniProtKB/Swiss-Prot;Acc:Q9WTX4]
100042493		ENSMUSG00000079785	20298 65956 100042493 100042544 100039131 100041593 100041504	AC087559.69-4	C-C motif chemokine 21a Precursor (Small-inducible cytokine A21a)(Small-inducible cytokine A21c)(Beta chemokine exodus-2)(6Ckine)(Thymus-derived chemotactic agent 4)(TCA4) [Source:UniProtKB/Swiss-Prot;Acc:P84443]
71946		ENSMUSG00000037419	71946	Endod1	Endonuclease domain-containing 1 protein Precursor (EC 3.1.30.-) [Source:UniProtKB/Swiss-Prot;Acc:Q8C522]
24099		ENSMUSG00000031497	24099	Tnfsf13b	Tumor necrosis factor ligand superfamily member 13B (B cell-activating factor)(BAFF)(CD257 antigen) [Contains Tumor necrosis factor ligand superfamily member 13b, membrane form;Tumor necrosis factor ligand superfamily member 13b, soluble form] [Source:UniProtKB/Swiss-Prot;Acc:Q9WU72]
17390		ENSMUSG00000031740	17390	Mmp2	72 kDa type IV collagenase Precursor (EC 3.4.24.24)(72 kDa gelatinase)(Matrix metalloproteinase-2)(MMP-2)(Gelatinase A) [Source:UniProtKB/Swiss-Prot;Acc:P33434]
20292		ENSMUSG00000020676	20292	Ccl11	Eotaxin Precursor (C-C motif chemokine 11)(Small-inducible cytokine A11)(Eosinophil chemotactic protein) [Source:UniProtKB/Swiss-Prot;Acc:P48298]
17387		ENSMUSG00000000957	17387	Mmp14	Matrix metalloproteinase-14 Precursor (MMP-14)(EC 3.4.24.80)(Membrane-type matrix metalloproteinase 1)(MT-MMP 1)(MTMMP1)(Membrane-type-1 matrix metalloproteinase)(MT1-MMP)(MT1MMP)(MMP-X1)(MT-MMP) [Source:UniProtKB/Swiss-Prot;Acc:P53690]
17842		ENSMUSG00000066154	17842	Mup3	Major urinary protein 3 Precursor (MUP 3)(Non-group 1/group 2 MUP15) [Source:UniProtKB/Swiss-Prot;Acc:P04939]
14603		ENSMUSG00000024682	14603	Gif	Gastric intrinsic factor Precursor (Intrinsic factor)(INF)(IF) [Source:UniProtKB/Swiss-Prot;Acc:P52787]
18119		ENSMUSG00000037171	18119	Nodal	Nodal Precursor [Source:UniProtKB/Swiss-Prot;Acc:P43021]
11491		ENSMUSG00000052593	11491	Adam17	Disintegrin and metalloproteinase domain-containing protein 17 Precursor (ADAM 17)(EC 3.4.24.86)(TNF-alpha-converting enzyme)(TNF-alpha convertase)(CD156b antigen) [Source:UniProtKB/Swiss-Prot;Acc:Q9Z0F8]
83965		ENSMUSG00000023960	83965	Enpp5	Ectonucleotide pyrophosphatase/phosphodiesterase family member 5 Precursor (E-NPP5)(NPP-5)(EC 3.1.-.-) [Source:UniProtKB/Swiss-Prot;Acc:Q9EQG7]
12279		ENSMUSG00000022149	12279	C9	Complement component C9 Precursor [Source:UniProtKB/Swiss-Prot;Acc:P06683]
13601		ENSMUSG00000028108	13601	Ecm1	Extracellular matrix protein 1 Precursor (Secretory component p85) [Source:UniProtKB/Swiss-Prot;Acc:Q61508]
16006		ENSMUSG00000020429	16006	Igfbp1	Insulin-like growth factor-binding protein 1 Precursor (IGF-binding protein 1)(IGFBP-1)(IBP-1) [Source:UniProtKB/Swiss-Prot;Acc:P47876]
22416		ENSMUSG00000009900	22416	Wnt3a	Protein Wnt-3a Precursor [Source:UniProtKB/Swiss-Prot;Acc:P27467]
18571		ENSMUSG00000032504	18571	Pdcd6ip	Programmed cell death 6-interacting protein (ALG-2-interacting protein X)(ALG-2-interacting protein 1)(E2F1-inducible protein)(Eig2) [Source:UniProtKB/Swiss-Prot;Acc:Q9WU78]
67272		ENSMUSG00000040759	67272	Cmtm5	CKLF-like MARVEL transmembrane domain-containing protein 5 (Chemokine-like factor superfamily member 5) [Source:UniProtKB/Swiss-Prot;Acc:Q9D6G9]
76293		ENSMUSG00000042436	76293	Mfap4	Microfibril-associated glycoprotein 4 Precursor [Source:UniProtKB/Swiss-Prot;Acc:Q9D1H9]
76399		ENSMUSG00000029437	76399	Il31	Interleukin-31 Precursor (IL-31) [Source:UniProtKB/Swiss-Prot;Acc:Q6EAL8]
20317		ENSMUSG00000000753	20317	Serpinf1	Pigment epithelium-derived factor Precursor (PEDF)(Serpin-F1)(Stromal cell-derived factor 3)(SDF-3)(Caspin) [Source:UniProtKB/Swiss-Prot;Acc:P97298]
22242		ENSMUSG00000030963	22242	Umod	Uromodulin Precursor (Tamm-Horsfall urinary glycoprotein)(THP) [Source:UniProtKB/Swiss-Prot;Acc:Q91X17]
18542		ENSMUSG00000029718	18542	Pcolce	Procollagen C-endopeptidase enhancer 1 Precursor (Procollagen COOH-terminal proteinase enhancer 1)(Procollagen C-proteinase enhancer 1)(PCPE-1)(Type I procollagen COOH-terminal proteinase enhancer)(Type 1 procollagen C-proteinase enhancer protein)(P14) [Source:UniProtKB/Swiss-Prot;Acc:Q61398]
20305		ENSMUSG00000018927	20305	Ccl6	C-C motif chemokine 6 Precursor (Small-inducible cytokine A6)(Protein C10) [Contains CCL6(22-95);CCL6(23-95)] [Source:UniProtKB/Swiss-Prot;Acc:P27784]
18548		ENSMUSG00000021587	18548	Pcsk1	Neuroendocrine convertase 1 Precursor (NEC 1)(EC 3.4.21.93)(Prohormone convertase 1)(Proprotein convertase 1)(PC1)(PC3)(Furin homolog)(Propeptide-processing protease) [Source:UniProtKB/Swiss-Prot;Acc:P63239]
67392		ENSMUSG00000062822	67392	4833420G17Rik	Uncharacterized protein C5orf34 homolog [Source:UniProtKB/Swiss-Prot;Acc:Q3UJC8]
22403		ENSMUSG00000027656	22403	Wisp2	WNT1-inducible-signaling pathway protein 2 Precursor (WISP-2)(Connective tissue growth factor-like protein)(CTGF-L) [Source:UniProtKB/Swiss-Prot;Acc:Q9Z0G4]
67719		ENSMUSG00000015519	67719	2310057J18Rik	Uncharacterized protein C6orf58 homolog Precursor [Source:UniProtKB/Swiss-Prot;Acc:Q8C6C9]
11595		ENSMUSG00000030607	11595	Acan	Aggrecan core protein Precursor (Cartilage-specific proteoglycan core protein)(CSPCP) [Source:UniProtKB/Swiss-Prot;Acc:Q61282]
68054		ENSMUSG00000041567	68054	Serpina12	Serpin A12 Precursor (Visceral adipose tissue-derived serine protease inhibitor)(Vaspin)(Visceral adipose-specific serpin) [Source:UniProtKB/Swiss-Prot;Acc:Q7TMF5]
67310		ENSMUSG00000006490	67310	Prl8a9	Prolactin-8A9 Precursor (Placental prolactin-like protein C2)(PRL-like protein C2)(PLP-C2)(Prolactin-like protein C-beta)(PLP C-beta) [Source:UniProtKB/Swiss-Prot;Acc:Q9CQ58]
12832		ENSMUSG00000026042	12832	Col5a2	Collagen alpha-2(V) chain Precursor [Source:UniProtKB/Swiss-Prot;Acc:Q3U962]
15530		ENSMUSG00000028763	15530	Hspg2	Basement membrane-specific heparan sulfate proteoglycan core protein Precursor (HSPG)(Perlecan)(PLC) [Source:UniProtKB/Swiss-Prot;Acc:Q05793]
50530		ENSMUSG00000030116	50530	Mfap5	Microfibrillar-associated protein 5 Precursor (MFAP-5)(Microfibril-associated glycoprotein 2)(MAGP-2) [Source:UniProtKB/Swiss-Prot;Acc:Q9QZJ6]
16176		ENSMUSG00000027398	16176	Il1b	Interleukin-1 beta Precursor (IL-1 beta) [Source:UniProtKB/Swiss-Prot;Acc:P10749]
15126		ENSMUSG00000055609	15126	Hba-x	Hemoglobin subunit zeta (Hemoglobin zeta chain)(Zeta-globin)(Alpha-like embryonic globin chain x) [Source:UniProtKB/Swiss-Prot;Acc:P06467]
70433		ENSMUSG00000029005	70433 100044686	2610109H07Rik	Draxin Precursor (Dorsal repulsive axon guidance protein)(Neucrin) [Source:UniProtKB/Swiss-Prot;Acc:Q6PAL1]
17700		ENSMUSG00000026100	17700	Mstn	Growth/differentiation factor 8 Precursor (GDF-8)(Myostatin) [Source:UniProtKB/Swiss-Prot;Acc:O08689]
13482		ENSMUSG00000035000	13482	Dpp4	Dipeptidyl peptidase 4 (EC 3.4.14.5)(Dipeptidyl peptidase IV)(DPP IV)(T-cell activation antigen CD26)(Thymocyte-activating molecule)(THAM)(CD26 antigen) [Contains Dipeptidyl peptidase 4 membrane form(Dipeptidyl peptidase IV membrane form);Dipeptidyl peptidase 4 soluble form(Dipeptidyl peptidase IV soluble form)] [Source:UniProtKB/Swiss-Prot;Acc:P28843]
56096		ENSMUSG00000061082	56096	Plac1	Placenta-specific protein 1 Precursor (EPCS26) [Source:UniProtKB/Swiss-Prot;Acc:Q9JI83]
14824		ENSMUSG00000034708	14824	Grn	Granulins Precursor (Proepithelin)(PEPI)(PC cell-derived growth factor)(PCDGF) [Contains Acrogranin;Granulin-1;Granulin-2;Granulin-3;Granulin-4;Granulin-5;Granulin-6;Granulin-7] [Source:UniProtKB/Swiss-Prot;Acc:P28798]
85031		ENSMUSG00000002847	85031	Pla1a	Phospholipase A1 member A Precursor (EC 3.1.1.-)(Phosphatidylserine-specific phospholipase A1)(PS-PLA1) [Source:UniProtKB/Swiss-Prot;Acc:Q8VI78]
18703		ENSMUSG00000026417	18703	Pigr	Polymeric immunoglobulin receptor Precursor (Poly-Ig receptor)(PIGR) [Contains Secretory component] [Source:UniProtKB/Swiss-Prot;Acc:O70570]
99543		ENSMUSG00000027848	99543	Olfml3	Olfactomedin-like protein 3 Precursor [Source:UniProtKB/Swiss-Prot;Acc:Q8BK62]
11572		ENSMUSG00000025433	11572	Crisp3	Cysteine-rich secretory protein 3 Precursor (CRISP-3)(Acidic epididymal glycoprotein 2)(Sperm-coating glycoprotein 2)(SCP 2) [Source:UniProtKB/Swiss-Prot;Acc:Q03402]
74145		ENSMUSG00000039109	74145	F13a1	Coagulation factor XIII A chain Precursor (Coagulation factor XIIIa)(EC 2.3.2.13)(Protein-glutamine gamma-glutamyltransferase A chain)(Transglutaminase A chain) [Source:UniProtKB/Swiss-Prot;Acc:Q8BH61]
80908		ENSMUSG00000015787	80908	Abo	Histo-blood group ABO system transferase (NAGAT)(Cis-AB transferase)(Glycoprotein-fucosylgalactoside alpha-N-acetylgalactosaminyltransferase)(EC 2.4.1.40)(Fucosylglycoprotein alpha-N-acetylgalactosaminyltransferase)(Histo-blood group A transferase)(A transferase)(Glycoprotein-fucosylgalactoside alpha-galactosyltransferase)(EC 2.4.1.37)(Fucosylglycoprotein 3-alpha-galactosyltransferase)(Histo-bloo…
12826		ENSMUSG00000031502	12826	Col4a1	Collagen alpha-1(IV) chain Precursor [Source:UniProtKB/Swiss-Prot;Acc:P02463]
16180		ENSMUSG00000022514	16180	Il1rap	Interleukin-1 receptor accessory protein Precursor (IL-1 receptor accessory protein)(IL-1RAcP) [Source:UniProtKB/Swiss-Prot;Acc:Q61730]
22287		ENSMUSG00000024653	22287	Scgb1a1	Uteroglobin Precursor (Secretoglobin family 1A member 1)(Clara cell phospholipid-binding protein)(CCPBP)(Clara cells 10 kDa secretory protein)(CC10)(PCB-binding protein)(Clara cell 17 kDa protein) [Source:UniProtKB/Swiss-Prot;Acc:Q06318]
54635		ENSMUSG00000028019	54635	Pdgfc	Platelet-derived growth factor C Precursor (PDGF-C)(Spinal cord-derived growth factor)(SCDGF)(Fallotein)(VEGF-E) [Contains Platelet-derived growth factor C, latent form(PDGFC latent form);Platelet-derived growth factor C, receptor-binding form(PDGFC receptor-binding form)] [Source:UniProtKB/Swiss-Prot;Acc:Q8CI19]
16483		ENSMUSG00000032758	16483	Kap	Kidney androgen-regulated protein Precursor (KAP)(ARP) [Source:UniProtKB/Swiss-Prot;Acc:P61110]
16334		ENSMUSG00000000215	16334	Ins2	Insulin-2 Precursor [Contains Insulin-2 B chain;Insulin-2 A chain] [Source:UniProtKB/Swiss-Prot;Acc:P01326]
18209		ENSMUSG00000079662	18209	Ntn3	Netrin-3 Precursor (Netrin-2-like protein) [Source:UniProtKB/Swiss-Prot;Acc:Q9R1A3]
94242		ENSMUSG00000028776	94242	Tinagl1	Tubulointerstitial nephritis antigen-like Precursor (Tubulointerstitial nephritis antigen-related protein)(TARP)(Androgen-regulated gene 1 protein)(Adrenocortical zonation factor 1)(AZ-1) [Source:UniProtKB/Swiss-Prot;Acc:Q99JR5]
83691		ENSMUSG00000025776	83691	Crispld1	Cysteine-rich secretory protein LCCL domain-containing 1 Precursor (CocoaCrisp) [Source:UniProtKB/Swiss-Prot;Acc:Q8CGD2]
18133		ENSMUSG00000037362	18133	Nov	Protein NOV homolog Precursor (NovH)(Nephroblastoma overexpressed gene protein homolog) [Source:UniProtKB/Swiss-Prot;Acc:Q64299]
12496		ENSMUSG00000015085	12496	Entpd2	Ectonucleoside triphosphate diphosphohydrolase 2 (NTPDase 2)(Ecto-ATPase)(EC 3.6.1.-)(CD39 antigen-like 1) [Source:UniProtKB/Swiss-Prot;Acc:O55026]
12837		ENSMUSG00000068196	12837	Col8a1	Collagen alpha-1(VIII) chain Precursor [Source:UniProtKB/Swiss-Prot;Acc:Q00780]
17022		ENSMUSG00000036446	17022	Lum	Lumican Precursor (Keratan sulfate proteoglycan lumican)(KSPG lumican) [Source:UniProtKB/Swiss-Prot;Acc:P51885]
13011		ENSMUSG00000068129	13011	Cst7	Cystatin-F Precursor (Leukocystatin)(Cystatin-7)(Cystatin-like metastasis-associated protein)(CMAP) [Source:UniProtKB/Swiss-Prot;Acc:O89098]
171530		ENSMUSG00000049699	171530	Ucn2	Urocortin-2 Precursor (Urocortin II)(Ucn II) [Source:UniProtKB/Swiss-Prot;Acc:Q99ML8]
53603		ENSMUSG00000024379	53603	Tslp	Thymic stromal lymphopoietin Precursor (Thymic stroma-derived lymphopoietin) [Source:UniProtKB/Swiss-Prot;Acc:Q9JIE6]
68527		ENSMUSG00000026668	68527	1110017I16Rik	Unique cartilage matrix-associated protein Precursor [Contains Unique cartilage matrix-associated protein C-terminal fragment(Ucma-C)(Gla-rich protein)(GRP)] [Source:UniProtKB/Swiss-Prot;Acc:Q14BU0]
12317		ENSMUSG00000003814	12317	Calr	Calreticulin Precursor (CRP55)(Calregulin)(HACBP)(ERp60) [Source:UniProtKB/Swiss-Prot;Acc:P14211]
76453		ENSMUSG00000039405	76453	Prss23	Serine protease 23 Precursor (EC 3.4.21.-) [Source:UniProtKB/Swiss-Prot;Acc:Q9D6X6]
18829		ENSMUSG00000078739	18829 100038965	CT868723.17-2	C-C motif chemokine 21b Precursor (Small-inducible cytokine A21b)(Beta chemokine exodus-2)(6Ckine)(Thymus-derived chemotactic agent 4)(TCA4) [Source:UniProtKB/Swiss-Prot;Acc:P84444]
75458		ENSMUSG00000054400	75458	Cklf	Chemokine-like factor [Source:UniProtKB/Swiss-Prot;Acc:Q9DAS1]
19226		ENSMUSG00000059077	19226	Pth	parathyroid hormone [Source:RefSeq peptide;Acc:NP_065648]
13805		ENSMUSG00000026814	13805	Eng	Endoglin Precursor (Cell surface MJ7/18 antigen)(CD105 antigen) [Source:UniProtKB/Swiss-Prot;Acc:Q63961]
14219		ENSMUSG00000019997	14219	Ctgf	Connective tissue growth factor Precursor (Protein FISP-12)(Hypertrophic chondrocyte-specific protein 24) [Source:UniProtKB/Swiss-Prot;Acc:P29268]
56177		ENSMUSG00000026833	56177	Olfm1	Noelin Precursor (Neuronal olfactomedin-related ER localized protein)(Olfactomedin-1)(Pancortin) [Source:UniProtKB/Swiss-Prot;Acc:O88998]
13038		ENSMUSG00000028111	13038	Ctsk	Cathepsin K Precursor (EC 3.4.22.38) [Source:UniProtKB/Swiss-Prot;Acc:P55097]
11815		ENSMUSG00000022548	11815	Apod	Apolipoprotein D Precursor (Apo-D)(ApoD) [Source:UniProtKB/Swiss-Prot;Acc:P51910]
94352		ENSMUSG00000034205	100047339 94352	Loxl2	Lysyl oxidase homolog 2 Precursor (EC 1.4.3.-)(Lysyl oxidase-like protein 2) [Source:UniProtKB/Swiss-Prot;Acc:P58022]
20704		ENSMUSG00000072849	20704	Serpina1e	Alpha-1-antitrypsin 1-5 Precursor (Serine protease inhibitor 1-5)(Serine protease inhibitor A1e)(Alpha-1 protease inhibitor 5) [Source:UniProtKB/Swiss-Prot;Acc:Q00898]
20604		ENSMUSG00000004366	20604	Sst	Somatostatin Precursor [Contains Antrin;Somatostatin-28;Somatostatin-14] [Source:UniProtKB/Swiss-Prot;Acc:P60041]
15248		ENSMUSG00000043099	15248	Hic1	Hypermethylated in cancer 1 protein (Hic-1) [Source:UniProtKB/Swiss-Prot;Acc:Q9R1Y5]
19109		ENSMUSG00000021342	19109	Prl	Prolactin Precursor (PRL) [Source:UniProtKB/Swiss-Prot;Acc:P06879]
12831		ENSMUSG00000026837	12831	Col5a1	Collagen alpha-1(V) chain Precursor [Source:UniProtKB/Swiss-Prot;Acc:O88207]
19662		ENSMUSG00000024990	19662	Rbp4	Retinol-binding protein 4 Precursor (Plasma retinol-binding protein)(PRBP)(RBP) [Source:UniProtKB/Swiss-Prot;Acc:Q00724]
68348		ENSMUSG00000021081	68348	Serpina1f	Alpha-1-antitrypsin 1-6 Precursor (Serine protease inhibitor 1-6)(Serine protease inhibitor A1f)(Alpha-1 protease inhibitor 6)(Alpha-1-antiproteinase) [Source:UniProtKB/Swiss-Prot;Acc:Q9DCQ7]
70370		ENSMUSG00000027386	70370	Fbln7	Fibulin-7 Precursor (FIBL-7)(Protein TM14) [Source:UniProtKB/Swiss-Prot;Acc:Q501P1]
66695		ENSMUSG00000021388	66695	Aspn	Asporin Precursor [Source:UniProtKB/Swiss-Prot;Acc:Q99MQ4]
17082		ENSMUSG00000026069	17082	Il1rl1	Interleukin-1 receptor-like 1 Precursor (Protein ST2)(Protein T1)(Lymphocyte antigen 84) [Source:UniProtKB/Swiss-Prot;Acc:P14719]
11516		ENSMUSG00000024256	11516	Adcyap1	Pituitary adenylate cyclase-activating polypeptide Precursor (PACAP) [Contains PACAP-related peptide(PRP-48);Pituitary adenylate cyclase-activating polypeptide 27(PACAP-27)(PACAP27);Pituitary adenylate cyclase-activating polypeptide 38(PACAP-38)(PACAP38)] [Source:UniProtKB/Swiss-Prot;Acc:O70176]
16621		ENSMUSG00000031640	16621	Klkb1	Plasma kallikrein Precursor (EC 3.4.21.34)(Plasma prekallikrein)(Kininogenin)(Fletcher factor) [Contains Plasma kallikrein heavy chain;Plasma kallikrein light chain] [Source:UniProtKB/Swiss-Prot;Acc:P26262]
12306		ENSMUSG00000032231	100048867 12306	Anxa2	Annexin A2 (Annexin-2)(Annexin II)(Lipocortin II)(Calpactin I heavy chain)(Chromobindin-8)(p36)(Protein I)(Placental anticoagulant protein IV)(PAP-IV) [Source:UniProtKB/Swiss-Prot;Acc:P07356]
14825		ENSMUSG00000029380	14825	Cxcl1	Growth-regulated alpha protein Precursor (C-X-C motif chemokine 1)(Platelet-derived growth factor-inducible protein KC)(Secretory protein N51) [Contains KC(5-72)(KC-T)(Hematopoietic synergistic factor)(HSF)] [Source:UniProtKB/Swiss-Prot;Acc:P12850]
66473		ENSMUSG00000031957	66473	Ctrb1	Chymotrypsinogen B Precursor (EC 3.4.21.1) [Contains Chymotrypsin B chain A;Chymotrypsin B chain B;Chymotrypsin B chain C] [Source:UniProtKB/Swiss-Prot;Acc:Q9CR35]
20256		ENSMUSG00000004473	20256	Clec11a	C-type lectin domain family 11 member A Precursor (Stem cell growth factor)(Lymphocyte secreted C-type lectin) [Source:UniProtKB/Swiss-Prot;Acc:O88200]
12165		ENSMUSG00000072625	12165	Gdf2	Growth/differentiation factor 2 Precursor (GDF-2)(Bone morphogenetic protein 9)(BMP-9) [Source:UniProtKB/Swiss-Prot;Acc:Q9WV56]
19288		ENSMUSG00000027832	19288	Ptx3	Pentraxin-related protein PTX3 Precursor (Pentaxin-related protein PTX3)(Tumor necrosis factor-inducible gene 14 protein)(TSG-14) [Source:UniProtKB/Swiss-Prot;Acc:P48759]
19695		ENSMUSG00000030017	19695	Reg3g	Regenerating islet-derived protein 3 gamma Precursor (Reg III-gamma)(Pancreatitis-associated protein 3) [Source:UniProtKB/Swiss-Prot;Acc:O09049]
94227		ENSMUSG00000067780	94227	Pi15	Peptidase inhibitor 15 Precursor (SugarCrisp) [Source:UniProtKB/Swiss-Prot;Acc:Q8BS03]
12799		ENSMUSG00000006782	12799	Cnp	2',3'-cyclic-nucleotide 3'-phosphodiesterase (CNPase)(CNP)(EC 3.1.4.37) [Source:UniProtKB/Swiss-Prot;Acc:P16330]
18232		ENSMUSG00000069132	18232	Nxph2	Neurexophilin-2 Precursor [Source:UniProtKB/Swiss-Prot;Acc:Q61199]
17381		ENSMUSG00000049723	17381	Mmp12	Macrophage metalloelastase Precursor (MME)(EC 3.4.24.65)(Matrix metalloproteinase-12)(MMP-12) [Source:UniProtKB/Swiss-Prot;Acc:P34960]
18132		ENSMUSG00000015468	18132	Notch4	Neurogenic locus notch homolog protein 4 Precursor (Notch 4) [Contains Transforming protein Int-3;Notch 4 extracellular truncation;Notch 4 intracellular domain] [Source:UniProtKB/Swiss-Prot;Acc:P31695]
56538		ENSMUSG00000067616	56538	Klk11	Kallikrein-11 Precursor (EC 3.4.21.-)(Hippostasin)(Serine protease 20) [Source:UniProtKB/Swiss-Prot;Acc:Q9QYN3]
15006		ENSMUSG00000079507	15006 15013	H2-Q2	histocompatibility 2, Q region locus 1 [Source:RefSeq peptide;Acc:NP_034520]
12111		ENSMUSG00000031375	12111	Bgn	Biglycan Precursor (Bone/cartilage proteoglycan I)(PG-S1) [Source:UniProtKB/Swiss-Prot;Acc:P28653]
353156		ENSMUSG00000026921	353156	Egfl7	EGF-like domain-containing protein 7 Precursor (Multiple EGF-like domain protein 7)(Multiple epidermal growth factor-like domain protein 7)(Vascular endothelial statin)(VE-statin)(NOTCH4-like protein)(Zneu1) [Source:UniProtKB/Swiss-Prot;Acc:Q9QXT5]
12847		ENSMUSG00000026553	12847	Copa	Coatomer subunit alpha (Alpha-coat protein)(Alpha-COP) [Contains Xenin(Xenopsin-related peptide);Proxenin] [Source:UniProtKB/Swiss-Prot;Acc:Q8CIE6]
16175		ENSMUSG00000027399	16175	Il1a	Interleukin-1 alpha Precursor (IL-1 alpha) [Source:UniProtKB/Swiss-Prot;Acc:P01582]
71660		ENSMUSG00000009281	71660	Rarres2	Retinoic acid receptor responder protein 2 Precursor [Source:UniProtKB/Swiss-Prot;Acc:Q9DD06]
72902		ENSMUSG00000054162	72902	Spock3	Testican-3 Precursor (SPARC/osteonectin, CWCV, and Kazal-like domains proteoglycan 3) [Source:UniProtKB/Swiss-Prot;Acc:Q8BKV0]
58809		ENSMUSG00000021876	58809	Rnase4	Ribonuclease 4 Precursor (RNase 4)(EC 3.1.27.-) [Source:UniProtKB/Swiss-Prot;Acc:Q9JJH1]
14038		ENSMUSG00000000983	14038	Expi	Extracellular peptidase inhibitor Precursor (Protein WDNM1) [Source:UniProtKB/Swiss-Prot;Acc:P62810]
12266		ENSMUSG00000024164	12266	C3	Complement C3 Precursor (HSE-MSF) [Contains Complement C3 beta chain;Complement C3 alpha chain;C3a anaphylatoxin;Complement C3b alpha' chain;Complement C3c alpha' chain fragment 1;Complement C3dg fragment;Complement C3g fragment;Complement C3d fragment;Complement C3f fragment;Complement C3c alpha' chain fragment 2] [Source:UniProtKB/Swiss-Prot;Acc:P01027]
57329		ENSMUSG00000027416	57329	Otor	Otoraplin Precursor (Melanoma inhibitory activity-like protein) [Source:UniProtKB/Swiss-Prot;Acc:Q9JIE3]
20600		ENSMUSG00000029281	20600	Smr2	Submaxillary gland androgen-regulated protein 2, isoform alpha Precursor (Salivary protein MSG2, isoform alpha) [Source:UniProtKB/Swiss-Prot;Acc:O09133]
76477		ENSMUSG00000015354	76477	Pcolce2	Procollagen C-endopeptidase enhancer 2 Precursor (Procollagen COOH-terminal proteinase enhancer 2)(Procollagen C-proteinase enhancer 2)(PCPE-2) [Source:UniProtKB/Swiss-Prot;Acc:Q8R4W6]
20512		ENSMUSG00000005360	20512	Slc1a3	Excitatory amino acid transporter 1 (Sodium-dependent glutamate/aspartate transporter 1)(GLAST-1)(High-affinity neuronal glutamate transporter)(Glial high affinity glutamate transporter)(Solute carrier family 1 member 3) [Source:UniProtKB/Swiss-Prot;Acc:P56564]
11489		ENSMUSG00000054555	11489	Adam12	Disintegrin and metalloproteinase domain-containing protein 12 Precursor (ADAM 12)(EC 3.4.24.-)(Meltrin-alpha) [Source:UniProtKB/Swiss-Prot;Acc:Q61824]
20370		ENSMUSG00000000632	20370	Sez6	Seizure protein 6 Precursor (SEZ-6)(Brain-specific receptor-like protein C)(BSRP-C) [Source:UniProtKB/Swiss-Prot;Acc:Q7TSK2]
16323		ENSMUSG00000041324	16323	Inhba	Inhibin beta A chain Precursor (Activin beta-A chain) [Source:UniProtKB/Swiss-Prot;Acc:Q04998]
21333		ENSMUSG00000061762	21333	Tac1	Protachykinin-1 Precursor (PPT) [Contains Substance P;Neurokinin A(NKA)(Substance K)(Neuromedin L);Neuropeptide K(NPK);Neuropeptide gamma;C-terminal-flanking peptide] [Source:UniProtKB/Swiss-Prot;Acc:P41539]
16782		ENSMUSG00000026479	16782	Lamc2	Laminin subunit gamma-2 Precursor (Laminin 5 gamma 2 subunit)(Kalinin/nicein/epiligrin 100 kDa subunit)(Laminin B2t chain) [Source:UniProtKB/Swiss-Prot;Acc:Q61092]
55987		ENSMUSG00000030862	55987	Cpxm2	Carboxypeptidase-like protein X2 Precursor [Source:UniProtKB/Swiss-Prot;Acc:Q9D2L5]
11602		ENSMUSG00000027460	11602	Angpt4	Angiopoietin-4 Precursor (ANG-4)(ANG-3) [Source:UniProtKB/Swiss-Prot;Acc:Q9WVH6]
192201		ENSMUSG00000018211	192201	Wfdc15b	WAP four-disulfide core domain protein 15B Precursor (Single WAP motif protein 1)(Elafin-like protein I) [Source:UniProtKB/Swiss-Prot;Acc:Q9JHY4]
56636		ENSMUSG00000030827	56636	Fgf21	Fibroblast growth factor 21 Precursor (FGF-21) [Source:UniProtKB/Swiss-Prot;Acc:Q9JJN1]
93671		ENSMUSG00000008845	93671	Cd163	Scavenger receptor cysteine-rich type 1 protein M130 Precursor (CD163 antigen) [Contains Soluble CD163(sCD163)] [Source:UniProtKB/Swiss-Prot;Acc:Q2VLH6]
71927		ENSMUSG00000031703	71927	Itfg1	T-cell immunomodulatory protein Precursor (Protein TIP)(Integrin-alpha FG-GAP repeat-containing protein 1) [Source:UniProtKB/Swiss-Prot;Acc:Q99KW9]
75526		ENSMUSG00000017733	75526	Spinlw1	Eppin Precursor (Epididymal protease inhibitor)(Serine protease inhibitor-like with Kunitz and WAP domains 1) [Source:UniProtKB/Swiss-Prot;Acc:Q9DA01]
18591		ENSMUSG00000000489	18591 100044675	Pdgfb	Platelet-derived growth factor subunit B Precursor (PDGF subunit B)(Platelet-derived growth factor B chain)(Platelet-derived growth factor beta polypeptide)(PDGF-2)(c-sis) [Source:UniProtKB/Swiss-Prot;Acc:P31240]
12833		ENSMUSG00000001119	12833	Col6a1	Collagen alpha-1(VI) chain Precursor [Source:UniProtKB/Swiss-Prot;Acc:Q04857]
73712		ENSMUSG00000060962	73712	Dmkn	Dermokine Precursor (Epidermis-specific secreted protein SK30/SK89) [Source:UniProtKB/Swiss-Prot;Acc:Q6P253]
21984		ENSMUSG00000033834	21984	Tpbpa	Trophoblast-specific protein alpha Precursor [Source:UniProtKB/Swiss-Prot;Acc:P13438]
110595		ENSMUSG00000030317	110595	Timp4	Metalloproteinase inhibitor 4 Precursor (Tissue inhibitor of metalloproteinases 4)(TIMP-4) [Source:UniProtKB/Swiss-Prot;Acc:Q9JHB3]
17388		ENSMUSG00000031790	17388	Mmp15	Matrix metalloproteinase-15 Precursor (MMP-15)(EC 3.4.24.-)(Membrane-type matrix metalloproteinase 2)(MT-MMP 2)(MTMMP2)(Membrane-type-2 matrix metalloproteinase)(MT2-MMP)(MT2MMP) [Source:UniProtKB/Swiss-Prot;Acc:O54732]
16949		ENSMUSG00000032334	16949	Loxl1	Lysyl oxidase homolog 1 Precursor (EC 1.4.3.-)(Lysyl oxidase-like protein 1)(Lysyl oxidase 2) [Source:UniProtKB/Swiss-Prot;Acc:P97873]
68553		ENSMUSG00000032572	68553	1110001D15Rik	Collagen alpha-4(VI) chain Precursor [Source:UniProtKB/Swiss-Prot;Acc:A2AX52]
56629		ENSMUSG00000028185	56629	Dnase2b	Deoxyribonuclease-2-beta Precursor (EC 3.1.22.1)(Deoxyribonuclease II beta)(DNase II beta)(DNase2-like acid DNase)(DNase II-like acid DNase)(Endonuclease DLAD) [Source:UniProtKB/Swiss-Prot;Acc:Q9QY48]
16591		ENSMUSG00000058488	16591	Kl	Klotho Precursor (EC 3.2.1.31) [Contains Klotho peptide] [Source:UniProtKB/Swiss-Prot;Acc:O35082]
19073		ENSMUSG00000020077	19073	Srgn	Serglycin Precursor (Secretory granule proteoglycan core protein)(Mastocytoma proteoglycan core protein)(gp600) [Source:UniProtKB/Swiss-Prot;Acc:P13609]
74549		ENSMUSG00000031858	74549	9130404D08Rik	Uncharacterized protein KIAA0892 Precursor [Source:UniProtKB/Swiss-Prot;Acc:Q9D2X5]
67405		ENSMUSG00000019890	67405	Nts	Neurotensin/neuromedin N Precursor [Contains Large neuromedin N(NmN-125);Neuromedin N(NmN)(NN);Neurotensin(NT);Tail peptide] [Source:UniProtKB/Swiss-Prot;Acc:Q9D3P9]
14066		ENSMUSG00000028128	14066	F3	Tissue factor Precursor (TF)(Coagulation factor III)(CD142 antigen) [Source:UniProtKB/Swiss-Prot;Acc:P20352]
67709		ENSMUSG00000027876	67709	Reg4	Regenerating islet-derived protein 4 Precursor [Source:UniProtKB/Swiss-Prot;Acc:Q9D8G5]
72709		ENSMUSG00000022440	72709	C1qtnf6	Complement C1q tumor necrosis factor-related protein 6 Precursor [Source:UniProtKB/Swiss-Prot;Acc:Q6IR41]
67606		ENSMUSG00000074971	67606	Fibin	Fin bud initiation factor homolog Precursor [Source:UniProtKB/Swiss-Prot;Acc:Q9CQS3]
78896		ENSMUSG00000026051	78896	1500015O10Rik	Augurin Precursor [Source:UniProtKB/Swiss-Prot;Acc:Q99LS0]
17105		ENSMUSG00000069516	17105	Lyz2	Lysozyme C-2 Precursor (EC 3.2.1.17)(Lysozyme C type M)(1,4-beta-N-acetylmuramidase C) [Source:UniProtKB/Swiss-Prot;Acc:P08905]
18295		ENSMUSG00000021390	18295	Ogn	Mimecan Precursor (Osteoglycin) [Source:UniProtKB/Swiss-Prot;Acc:Q62000]
20315		ENSMUSG00000061353	20315	Cxcl12	Stromal cell-derived factor 1 Precursor (SDF-1)(C-X-C motif chemokine 12)(Pre-B cell growth-stimulating factor)(PBSF)(12-O-tetradecanoylphorbol 13-acetate repressed protein 1)(TPAR1)(Thymic lymphoma cell-stimulating factor)(TLSF) [Source:UniProtKB/Swiss-Prot;Acc:P40224]
108151		ENSMUSG00000040254	100044160 108151	Sema3d	Semaphorin-3D Precursor [Source:UniProtKB/Swiss-Prot;Acc:Q8BH34]
77125		ENSMUSG00000024810	77125	Il33	Interleukin-33 Precursor (IL-33) [Source:UniProtKB/Swiss-Prot;Acc:Q8BVZ5]
16803		ENSMUSG00000016024	16803	Lbp	Lipopolysaccharide-binding protein Precursor (LBP) [Source:UniProtKB/Swiss-Prot;Acc:Q61805]
54381		ENSMUSG00000039007	54381	Pgcp	Plasma glutamate carboxypeptidase Precursor (EC 3.4.17.-)(Hematopoietic lineage switch 2) [Source:UniProtKB/Swiss-Prot;Acc:Q9WVJ3]
20612		ENSMUSG00000027322	20612	Siglec1	Sialoadhesin Precursor (Sialic acid-binding Ig-like lectin 1)(Siglec-1)(Sheep erythrocyte receptor)(SER)(CD169 antigen) [Source:UniProtKB/Swiss-Prot;Acc:Q62230]
16171		ENSMUSG00000025929	16171	Il17a	Interleukin-17A Precursor (IL-17A)(IL-17)(Cytotoxic T-lymphocyte-associated antigen 8)(CTLA-8) [Source:UniProtKB/Swiss-Prot;Acc:Q62386]
13602		ENSMUSG00000029309	13602	Sparcl1	SPARC-like protein 1 Precursor (Matrix glycoprotein Sc1)(Extracellular matrix protein 2) [Source:UniProtKB/Swiss-Prot;Acc:P70663]
22341		ENSMUSG00000031520	22341	Vegfc	Vascular endothelial growth factor C Precursor (VEGF-C)(Vascular endothelial growth factor-related protein)(VRP)(Flt4 ligand)(Flt4-L) [Source:UniProtKB/Swiss-Prot;Acc:P97953]
20363		ENSMUSG00000064373	20363	Sepp1	Selenoprotein P Precursor (SeP)(Plasma selenoprotein P) [Source:UniProtKB/Swiss-Prot;Acc:P70274]
67946		ENSMUSG00000034401	67946	Spata6	Spermatogenesis-associated protein 6 Precursor (Kinesin-related protein) [Source:UniProtKB/Swiss-Prot;Acc:Q3U6K5]
13645		ENSMUSG00000028017	13645	Egf	Pro-epidermal growth factor Precursor (EGF) [Contains Epidermal growth factor] [Source:UniProtKB/Swiss-Prot;Acc:P01132]
74069		ENSMUSG00000041536	74069	Serpina3a	Serine protease inhibitor A3A Precursor (Serpin A3A) [Source:UniProtKB/Swiss-Prot;Acc:Q6P4P1]
17313		ENSMUSG00000030218	17313	Mgp	Matrix Gla protein Precursor (MGP) [Source:UniProtKB/Swiss-Prot;Acc:P19788]
21827		ENSMUSG00000028047	21827	Thbs3	Thrombospondin-3 Precursor [Source:UniProtKB/Swiss-Prot;Acc:Q05895]
21857		ENSMUSG00000001131	21857	Timp1	Metalloproteinase inhibitor 1 Precursor (Tissue inhibitor of metalloproteinases)(TIMP-1)(Erythroid-potentiating activity)(EPA)(Collagenase inhibitor 16C8 fibroblast)(TPA-induced protein)(TPA-S1) [Source:UniProtKB/Swiss-Prot;Acc:P12032]
71355		ENSMUSG00000028197	71355	Col24a1	Collagen alpha-1(XXIV) chain Precursor [Source:UniProtKB/Swiss-Prot;Acc:Q30D77]
53867		ENSMUSG00000004098	53867	Col5a3	collagen, type V, alpha 3 [Source:RefSeq peptide;Acc:NP_058615]
56213		ENSMUSG00000006205	56213	Htra1	Serine protease HTRA1 Precursor (EC 3.4.21.-)(Serine protease 11) [Source:UniProtKB/Swiss-Prot;Acc:Q9R118]
19126		ENSMUSG00000029086	19126	Prom1	Prominin-1 Precursor (Prominin-like protein 1)(Antigen AC133 homolog)(CD133 antigen) [Source:UniProtKB/Swiss-Prot;Acc:O54990]
68588		ENSMUSG00000054196	68588	Cthrc1	Collagen triple helix repeat-containing protein 1 Precursor [Source:UniProtKB/Swiss-Prot;Acc:Q9D1D6]
13857		ENSMUSG00000006235	13857	Epor	Erythropoietin receptor Precursor (EPO-R) [Source:UniProtKB/Swiss-Prot;Acc:P14753]
18429		ENSMUSG00000027301	18429	Oxt	Oxytocin-neurophysin 1 Precursor (OT-NPI) [Contains Oxytocin(Ocytocin);Neurophysin 1] [Source:UniProtKB/Swiss-Prot;Acc:P35454]
12260		ENSMUSG00000036905	12260	C1qb	Complement C1q subcomponent subunit B Precursor [Source:UniProtKB/Swiss-Prot;Acc:P14106]
19283		ENSMUSG00000068748	19283	Ptprz1	protein tyrosine phosphatase, receptor type Z, polypeptide 1 [Source:RefSeq peptide;Acc:NP_001074775]
76510		ENSMUSG00000047921	76510	Trappc9	Trafficking protein particle complex subunit 9 (NIK- and IKBKB-binding protein) [Source:UniProtKB/Swiss-Prot;Acc:Q3U0M1]
14733		ENSMUSG00000034220	14733	Gpc1	Glypican-1 Precursor [Contains Secreted glypican-1] [Source:UniProtKB/Swiss-Prot;Acc:Q9QZF2]
23794		ENSMUSG00000022894	23794 632263	Adamts5	A disintegrin and metalloproteinase with thrombospondin motifs 5 Precursor (ADAMTS-5)(ADAM-TS 5)(ADAM-TS5)(EC 3.4.24.-)(Aggrecanase-2)(ADMP-2)(Implantin) [Source:UniProtKB/Swiss-Prot;Acc:Q9R001]
17395		ENSMUSG00000017737	17395	Mmp9	Matrix metalloproteinase-9 Precursor (MMP-9)(EC 3.4.24.35)(92 kDa type IV collagenase)(92 kDa gelatinase)(Gelatinase B)(GELB) [Source:UniProtKB/Swiss-Prot;Acc:P41245]
22413		ENSMUSG00000010797	22413	Wnt2	Protein Wnt-2 Precursor (INT-1-related protein)(IRP protein) [Source:UniProtKB/Swiss-Prot;Acc:P21552]
24117		ENSMUSG00000020218	24117	Wif1	Wnt inhibitory factor 1 Precursor (WIF-1) [Source:UniProtKB/Swiss-Prot;Acc:Q9WUA1]
22410		ENSMUSG00000022996	22410	Wnt10b	Protein Wnt-10b Precursor (Wnt-12) [Source:UniProtKB/Swiss-Prot;Acc:P48614]
67896		ENSMUSG00000022665	67896	Ccdc80	Coiled-coil domain-containing protein 80 Precursor (Up-regulated in BRS-3 deficient mouse) [Source:UniProtKB/Swiss-Prot;Acc:Q8R2G6]
56872		ENSMUSG00000032099	56872	Pate4	Prostate and testis expressed protein 4 Precursor (PATE-like protein B)(PATE-B)(Seminal vesicle protein 7)(Seminal vesicle protein VII)(SVS VII)(Caltrin)(Calcium transport inhibitor) [Source:UniProtKB/Swiss-Prot;Acc:Q09098]
15969		ENSMUSG00000078641	15969	Ifna6	Interferon alpha-6 Precursor (Interferon alpha-8) [Source:UniProtKB/Swiss-Prot;Acc:P07350]
232717		ENSMUSG00000051936	232717	BC048599	Putative trypsin-X3 Precursor (EC 3.4.21.4) [Source:UniProtKB/Swiss-Prot;Acc:Q8BW11]
64817		ENSMUSG00000028369	64817	Svep1	Sushi, von Willebrand factor type A, EGF and pentraxin domain-containing protein 1 Precursor (Polydom) [Source:UniProtKB/Swiss-Prot;Acc:A2AVA0]
64242		ENSMUSG00000021032	64242	Ngb	Neuroglobin [Source:UniProtKB/Swiss-Prot;Acc:Q9ER97]
21936		ENSMUSG00000041954	21936	Tnfrsf18	Tumor necrosis factor receptor superfamily member 18 Precursor (Glucocorticoid-induced TNFR-related protein) [Source:UniProtKB/Swiss-Prot;Acc:O35714]
18779		ENSMUSG00000054580	18779	Pla2r1	Secretory phospholipase A2 receptor Precursor (PLA2-R)(PLA2R)(180 kDa secretory phospholipase A2 receptor)(M-type receptor) [Contains Soluble secretory phospholipase A2 receptor(Soluble PLA2-R)(Soluble PLA2R)] [Source:UniProtKB/Swiss-Prot;Acc:Q62028]
21826		ENSMUSG00000023885	21826	Thbs2	Thrombospondin-2 Precursor [Source:UniProtKB/Swiss-Prot;Acc:Q03350]
12818		ENSMUSG00000022371	12818	Col14a1	Collagen alpha-1(XIV) chain Precursor [Source:UniProtKB/Swiss-Prot;Acc:Q80X19]
110312		ENSMUSG00000035383	110312	Pmch	Pro-MCH Precursor [Contains Neuropeptide-glycine-glutamic acid(Neuropeptide G-E)(NGE);Neuropeptide-glutamic acid-isoleucine(Neuropeptide E-I)(NEI);Melanin-concentrating hormone(MCH)] [Source:UniProtKB/Swiss-Prot;Acc:P56942]
65116		ENSMUSG00000007837	65116	Prrg2	Transmembrane gamma-carboxyglutamic acid protein 2 Precursor (Proline-rich gamma-carboxyglutamic acid protein 2)(Proline-rich Gla protein 2)(NEDD4 WW domain-binding protein 1) [Source:UniProtKB/Swiss-Prot;Acc:Q8R182]
66113		ENSMUSG00000032079	66113	Apoa5	Apolipoprotein A-V Precursor (Apo-AV)(ApoA-V)(Apolipoprotein A5)(Regeneration-associated protein 3) [Source:UniProtKB/Swiss-Prot;Acc:Q8C7G5]
16775		ENSMUSG00000019846	16775	Lama4	Laminin subunit alpha-4 Precursor [Source:UniProtKB/Swiss-Prot;Acc:P97927]
14118		ENSMUSG00000027204	14118	Fbn1	Fibrillin-1 Precursor [Source:UniProtKB/Swiss-Prot;Acc:Q61554]
16012		ENSMUSG00000023046	16012	Igfbp6	Insulin-like growth factor-binding protein 6 Precursor (IGF-binding protein 6)(IGFBP-6)(IBP-6) [Source:UniProtKB/Swiss-Prot;Acc:P47880]
53381		ENSMUSG00000025289	53381	Prdx4	Peroxiredoxin-4 (EC 1.11.1.15)(Prx-IV)(Thioredoxin peroxidase AO372)(Thioredoxin-dependent peroxide reductase A0372)(Antioxidant enzyme AOE372) [Source:UniProtKB/Swiss-Prot;Acc:O08807]
55985		ENSMUSG00000023078	55985	Cxcl13	C-X-C motif chemokine 13 Precursor (Small-inducible cytokine B13)(B lymphocyte chemoattractant)(CXC chemokine BLC) [Source:UniProtKB/Swiss-Prot;Acc:O55038]
73381		ENSMUSG00000074127	73381	Cmtm2a	CKLF-like MARVEL transmembrane domain-containing protein 2A (Chemokine-like factor superfamily member 2A) [Source:UniProtKB/Swiss-Prot;Acc:Q9DAR1]
12643		ENSMUSG00000039084	12643	Chad	Chondroadherin Precursor (Cartilage leucine-rich protein) [Source:UniProtKB/Swiss-Prot;Acc:O55226]
56429		ENSMUSG00000026574	56429	Dpt	Dermatopontin Precursor (Tyrosine-rich acidic matrix protein)(TRAMP)(Early quiescence protein 1)(EQ-1) [Source:UniProtKB/Swiss-Prot;Acc:Q9QZZ6]
18843		ENSMUSG00000027483	18843	Plunc	Protein Plunc Precursor (Palate lung and nasal epithelium clone protein) [Source:UniProtKB/Swiss-Prot;Acc:P97361]
77794		ENSMUSG00000036040	77794	Adamtsl2	ADAMTS-like protein 2 Precursor (ADAMTSL-2)(TSP1-repeats-containing protein 1)(TCP-1) [Source:UniProtKB/Swiss-Prot;Acc:Q7TSK7]
81799		ENSMUSG00000058914	81799	C1qtnf3	Complement C1q tumor necrosis factor-related protein 3 Precursor (Secretory protein CORS26) [Source:UniProtKB/Swiss-Prot;Acc:Q9ES30]
20657		ENSMUSG00000072941	20657	Sod3	Extracellular superoxide dismutase [Cu-Zn] Precursor (EC-SOD)(EC 1.15.1.1) [Source:UniProtKB/Swiss-Prot;Acc:O09164]
15968		ENSMUSG00000076440	15968	Ifna5	Interferon alpha-5 Precursor [Source:UniProtKB/Swiss-Prot;Acc:P07349]
16193		ENSMUSG00000025746	16193	Il6	Interleukin-6 Precursor (IL-6)(Interleukin HP-1)(B-cell hybridoma growth factor) [Source:UniProtKB/Swiss-Prot;Acc:P08505]
22329		ENSMUSG00000027962	22329	Vcam1	Vascular cell adhesion protein 1 Precursor (V-CAM 1)(CD106 antigen) [Source:UniProtKB/Swiss-Prot;Acc:P29533]
17831		ENSMUSG00000078533	17831	Muc2	Muc2 protein Fragment [Source:UniProtKB/TrEMBL;Acc:Q80Z17]
16950		ENSMUSG00000000693	16950	Loxl3	Lysyl oxidase homolog 3 Precursor (EC 1.4.3.-)(Lysyl oxidase-like protein 3)(Lysyl oxidase-related protein 2) [Source:UniProtKB/Swiss-Prot;Acc:Q9Z175]
80903		ENSMUSG00000031230	80903	Fgf16	Fibroblast growth factor 16 (FGF-16) [Source:UniProtKB/Swiss-Prot;Acc:Q9ESL8]
81877		ENSMUSG00000033327	81877	Tnxb	tenascin XB [Source:RefSeq peptide;Acc:NP_112453]
57914		ENSMUSG00000033467	57914	Crlf2	Cytokine receptor-like factor 2 Precursor (Thymic stromal lymphopoietin protein receptor)(TSLP receptor)(Type I cytokine receptor delta 1)(Cytokine receptor-like molecule 2)(CRLM-2) [Source:UniProtKB/Swiss-Prot;Acc:Q8CII9]
15972		ENSMUSG00000078644	15972	Ifna9	Interferon alpha-9 Precursor [Source:UniProtKB/Swiss-Prot;Acc:P09235]
16994		ENSMUSG00000024399	16994	Ltb	Lymphotoxin-beta (LT-beta)(Tumor necrosis factor C)(TNF-C)(Tumor necrosis factor ligand superfamily member 3) [Source:UniProtKB/Swiss-Prot;Acc:P41155]
24087		ENSMUSG00000025013	24087	Tll2	Tolloid-like protein 2 Precursor (EC 3.4.24.-) [Source:UniProtKB/Swiss-Prot;Acc:Q9WVM6]
55935		ENSMUSG00000008200	55935	Fnbp4	Formin-binding protein 4 (Formin-binding protein 30) [Source:UniProtKB/Swiss-Prot;Acc:Q6ZQ03]
75396		ENSMUSG00000026295	75396	Spp2	Secreted phosphoprotein 24 Precursor (Spp-24)(Secreted phosphoprotein 2) [Source:UniProtKB/Swiss-Prot;Acc:Q8K1I3]
71690		ENSMUSG00000042379	71690	Esm1	Endothelial cell-specific molecule 1 Precursor (ESM-1 secretory protein)(ESM-1) [Source:UniProtKB/Swiss-Prot;Acc:Q9QYY7]
12823		ENSMUSG00000026141	12823	Col19a1	Collagen alpha-1(XIX) chain Precursor (Collagen alpha-1(Y) chain) [Source:UniProtKB/Swiss-Prot;Acc:Q0VF58]
12654		ENSMUSG00000064246	12654	Chi3l1	Chitinase-3-like protein 1 Precursor (Cartilage glycoprotein 39)(CGP-39)(GP-39)(BRP39 protein) [Source:UniProtKB/Swiss-Prot;Acc:Q61362]
64074		ENSMUSG00000023886	64074	Smoc2	SPARC-related modular calcium-binding protein 2 Precursor (Secreted modular calcium-binding protein 2)(SMOC-2) [Source:UniProtKB/Swiss-Prot;Acc:Q8CD91]
68792		ENSMUSG00000031253	68792	Srpx2	Sushi repeat-containing protein SRPX2 Precursor [Source:UniProtKB/Swiss-Prot;Acc:Q8R054]
18636		ENSMUSG00000001128	18636	Cfp	Properdin Precursor (Complement factor P) [Source:UniProtKB/Swiss-Prot;Acc:P11680]
78242		ENSMUSG00000061144	78242	Spink12	Serine protease inhibitor Kazal-type 12 Precursor [Source:UniProtKB/Swiss-Prot;Acc:Q9D256]
71907		ENSMUSG00000058260	71907	Serpina9	Serpin A9 Precursor [Source:UniProtKB/Swiss-Prot;Acc:Q9D7D2]
20303		ENSMUSG00000018930	20303	Ccl4	C-C motif chemokine 4 Precursor (Small-inducible cytokine A4)(Macrophage inflammatory protein 1-beta)(MIP-1-beta)(Immune activation protein 2)(ACT-2)(ACT2)(Protein H400)(SIS-gamma) [Source:UniProtKB/Swiss-Prot;Acc:P14097]
223672		ENSMUSG00000068246	223672	Apol9b	Apol9a protein [Source:UniProtKB/TrEMBL;Acc:Q8VDU3]
20941		ENSMUSG00000016998	20941	Svs4	Seminal vesicle secretory protein 4 Precursor (Seminal vesicle secretory protein IV)(SVS IV)(Seminal vesicle protein 2) [Source:UniProtKB/Swiss-Prot;Acc:P18419]
56744		ENSMUSG00000029373	56744	Pf4	Platelet factor 4 Precursor (PF-4)(C-X-C motif chemokine 4) [Source:UniProtKB/Swiss-Prot;Acc:Q9Z126]
21824		ENSMUSG00000074743	21824	Thbd	Thrombomodulin Precursor (TM)(Fetomodulin)(CD141 antigen) [Source:UniProtKB/Swiss-Prot;Acc:P15306]
15458		ENSMUSG00000030895	15458	Hpx	Hemopexin Precursor [Source:UniProtKB/Swiss-Prot;Acc:Q91X72]
18549		ENSMUSG00000027419	18549	Pcsk2	Neuroendocrine convertase 2 Precursor (NEC 2)(EC 3.4.21.94)(Prohormone convertase 2)(Proprotein convertase 2)(PC2)(KEX2-like endoprotease 2) [Source:UniProtKB/Swiss-Prot;Acc:P21661]
93695		ENSMUSG00000029816	93695	Gpnmb	Transmembrane glycoprotein NMB Precursor (Dendritic cell-associated transmembrane protein)(DC-HIL) [Source:UniProtKB/Swiss-Prot;Acc:Q99P91]
64335		ENSMUSG00000017003	64335	Svs3a	seminal vesicle secretion 3 alpha [Source:RefSeq peptide;Acc:NP_067338]
21828		ENSMUSG00000021702	21828	Thbs4	Thrombospondin-4 Precursor [Source:UniProtKB/Swiss-Prot;Acc:Q9Z1T2]
71939		ENSMUSG00000033576	71939	Apol6	Apolipoprotein L 6 [Source:UniProtKB/TrEMBL;Acc:B7ZC54]
11450		ENSMUSG00000022878	11450	Adipoq	Adiponectin Precursor (Adipocyte, C1q and collagen domain-containing protein)(30 kDa adipocyte complement-related protein)(Adipocyte complement-related 30 kDa protein)(ACRP30)(Adipocyte-specific protein AdipoQ) [Source:UniProtKB/Swiss-Prot;Acc:Q60994]
27047		ENSMUSG00000048368	27047	Omd	Osteomodulin Precursor (Osteoadherin)(OSAD)(Keratan sulfate proteoglycan osteomodulin)(KSPG osteomodulin) [Source:UniProtKB/Swiss-Prot;Acc:O35103]
227580		ENSMUSG00000049630	227580	C1ql3	Complement C1q-like protein 3 Precursor (Gliacolin) [Source:UniProtKB/Swiss-Prot;Acc:Q9ESN4]
14469		ENSMUSG00000028270	14469	Gbp2	Interferon-induced guanylate-binding protein 2 (Guanine nucleotide-binding protein 2)(GTP-binding protein 2)(GBP-2)(mGBP-2)(mGBP2) [Source:UniProtKB/Swiss-Prot;Acc:Q9Z0E6]
23888		ENSMUSG00000058571	100045283 23888	Gpc6	Glypican-6 Precursor [Contains Secreted glypican-6] [Source:UniProtKB/Swiss-Prot;Acc:Q9R087]
11535		ENSMUSG00000030790	11535	Adm	ADM Precursor [Contains Adrenomedullin(AM);Proadrenomedullin N-20 terminal peptide(ProAM N-terminal 20 peptide)(ProAM-N20)(PAMP)] [Source:UniProtKB/Swiss-Prot;Acc:P97297]
29817		ENSMUSG00000036256	29817	Igfbp7	Insulin-like growth factor-binding protein 7 Precursor (IGF-binding protein 7)(IGFBP-7)(IBP-7)(MAC25 protein) [Source:UniProtKB/Swiss-Prot;Acc:Q61581]
72792		ENSMUSG00000026227	72792	2810459M11Rik	Uncharacterized protein C2orf72 homolog Precursor [Source:UniProtKB/Swiss-Prot;Acc:Q9CYS6]
12155		ENSMUSG00000023279	12155	Bmp15	Bone morphogenetic protein 15 Precursor (BMP-15)(Growth/differentiation factor 9B)(GDF-9B) [Source:UniProtKB/Swiss-Prot;Acc:Q9Z0L4]
13003		ENSMUSG00000021614	13003	Vcan	Versican core protein Precursor (Large fibroblast proteoglycan)(Chondroitin sulfate proteoglycan core protein 2)(PG-M) [Source:UniProtKB/Swiss-Prot;Acc:Q62059]
170721		ENSMUSG00000021223	170721	Papln	Papilin Precursor [Source:UniProtKB/Swiss-Prot;Acc:Q9EPX2]
57319		ENSMUSG00000019872	57319	Smpdl3a	Acid sphingomyelinase-like phosphodiesterase 3a Precursor (ASM-like phosphodiesterase 3a)(EC 3.1.4.-) [Source:UniProtKB/Swiss-Prot;Acc:P70158]
193813		ENSMUSG00000024150	193813	Mcfd2	Multiple coagulation factor deficiency protein 2 homolog Precursor (Neural stem cell-derived neuronal survival protein) [Source:UniProtKB/Swiss-Prot;Acc:Q8K5B2]
17311		ENSMUSG00000019966	17311	Kitl	Kit ligand Precursor (C-kit ligand)(Stem cell factor)(SCF)(Mast cell growth factor)(MGF)(Hematopoietic growth factor KL)(Steel factor) [Source:UniProtKB/Swiss-Prot;Acc:P20826]
70008		ENSMUSG00000015405	70008	Ace2	Angiotensin-converting enzyme 2 Precursor (EC 3.4.17.-)(ACE-related carboxypeptidase) [Contains Processed angiotensin-converting enzyme 2] [Source:UniProtKB/Swiss-Prot;Acc:Q8R0I0]
246081		ENSMUSG00000045337	246081	Defb11	Beta-defensin 11 Precursor (BD-11)(mBD-11)(Defensin, beta 11) [Source:UniProtKB/Swiss-Prot;Acc:Q8R2I7]
12829		ENSMUSG00000067158	12829	Col4a4	Collagen alpha-4(IV) chain Precursor [Source:UniProtKB/Swiss-Prot;Acc:Q9QZR9]
12828		ENSMUSG00000079465	12828	Col4a3	Collagen alpha-3(IV) chain Precursor [Contains Tumstatin] [Source:UniProtKB/Swiss-Prot;Acc:Q9QZS0]
23886		ENSMUSG00000038508	23886	Gdf15	Growth/differentiation factor 15 Precursor (GDF-15) [Source:UniProtKB/Swiss-Prot;Acc:Q9Z0J7]
79202		ENSMUSG00000010751	79202	Tnfrsf22	Tumor necrosis factor receptor superfamily member 22 (Tumor necrosis factor receptor p60 homolog 2)(TNF receptor family member SOBa)(Decoy TRAIL receptor 2)(TNF receptor homolog 2) [Source:UniProtKB/Swiss-Prot;Acc:Q9ER62]
14314		ENSMUSG00000022816	14314	Fstl1	Follistatin-related protein 1 Precursor (Follistatin-like 1)(TGF-beta-inducible protein TSC-36) [Source:UniProtKB/Swiss-Prot;Acc:Q62356]
16956		ENSMUSG00000015568	16956 669888	Lpl	Lipoprotein lipase Precursor (LPL)(EC 3.1.1.34) [Source:UniProtKB/Swiss-Prot;Acc:P11152]
20319		ENSMUSG00000027996	20319	Sfrp2	Secreted frizzled-related protein 2 Precursor (sFRP-2)(Secreted apoptosis-related protein 1)(SARP-1)(SDF5 protein) [Source:UniProtKB/Swiss-Prot;Acc:P97299]
15974		ENSMUSG00000078353	15974	Ifnab	interferon alpha family, gene B precursor [Source:RefSeq peptide;Acc:NP_032362]
67610		ENSMUSG00000050079	67610	Rspry1	RING finger and SPRY domain-containing protein 1 Precursor [Source:UniProtKB/Swiss-Prot;Acc:Q8BVR6]
12825		ENSMUSG00000026043	12825	Col3a1	Collagen alpha-1(III) chain Precursor [Source:UniProtKB/Swiss-Prot;Acc:P08121]
80733		ENSMUSG00000079715	80733	Car15	Carbonic anhydrase 15 Precursor (EC 4.2.1.1)(Carbonic anhydrase XV)(CA-XV)(Carbonate dehydratase XV) [Source:UniProtKB/Swiss-Prot;Acc:Q99N23]
11537		ENSMUSG00000061780	11537	Cfd	Complement factor D Precursor (EC 3.4.21.46)(C3 convertase activator)(Properdin factor D)(Adipsin)(28 kDa adipocyte protein) [Source:UniProtKB/Swiss-Prot;Acc:P03953]
16007		ENSMUSG00000028195	16007	Cyr61	Protein CYR61 Precursor (Cysteine-rich angiogenic inducer 61)(Insulin-like growth factor-binding protein 10)(3CH61) [Source:UniProtKB/Swiss-Prot;Acc:P18406]
20310		ENSMUSG00000058427	20310	Cxcl2	C-X-C motif chemokine 2 Precursor (Macrophage inflammatory protein 2)(MIP2) [Source:UniProtKB/Swiss-Prot;Acc:P10889]
72043		ENSMUSG00000006800	72043	Sulf2	Extracellular sulfatase Sulf-2 Precursor (EC 3.1.6.-)(MSulf-2) [Source:UniProtKB/Swiss-Prot;Acc:Q8CFG0]
17329		ENSMUSG00000029417	17329	Cxcl9	C-X-C motif chemokine 9 Precursor (Small-inducible cytokine B9)(Gamma-interferon-induced monokine)(MIG)(M119) [Source:UniProtKB/Swiss-Prot;Acc:P18340]
57262		ENSMUSG00000061100	57262	Retnla	Resistin-like alpha Precursor (RELMalpha)(Cysteine-rich secreted protein FIZZ1)(Parasite-induced macrophage novel gene 1 protein)(Cysteine-rich secreted protein A12-gamma) [Source:UniProtKB/Swiss-Prot;Acc:Q9EP95]
26968		ENSMUSG00000037206	26968	Islr	Immunoglobulin superfamily containing leucine-rich repeat protein Precursor [Source:UniProtKB/Swiss-Prot;Acc:Q6GU68]
14778		ENSMUSG00000018339	14778	Gpx3	Glutathione peroxidase 3 Precursor (EC 1.11.1.9)(GSHPx-3)(GPx-3)(Plasma glutathione peroxidase)(GSHPx-P) [Source:UniProtKB/Swiss-Prot;Acc:P46412]
20296		ENSMUSG00000035385	20296	Ccl2	C-C motif chemokine 2 Precursor (Small-inducible cytokine A2)(Monocyte chemoattractant protein 1)(Monocyte chemotactic protein 1)(MCP-1)(Platelet-derived growth factor-inducible protein JE) [Source:UniProtKB/Swiss-Prot;Acc:P10148]
14069		ENSMUSG00000031196	14069	F8	Coagulation factor VIII Precursor (Procoagulant component) [Source:UniProtKB/Swiss-Prot;Acc:Q06194]
20387		ENSMUSG00000021789	20387	Sftpa1	Pulmonary surfactant-associated protein A Precursor (SP-A)(PSP-A)(PSAP) [Source:UniProtKB/Swiss-Prot;Acc:P35242]
14264		ENSMUSG00000041559	14264	Fmod	Fibromodulin Precursor (FM)(Collagen-binding 59 kDa protein)(Keratan sulfate proteoglycan fibromodulin)(KSPG fibromodulin) [Source:UniProtKB/Swiss-Prot;Acc:P50608]
67135		ENSMUSG00000027484	67135	2310021H06Rik	Palate lung and nasal carcinoma-like protein Precursor (Tongue plunc-like protein)(TPL)(Short palate lung and nasal clone protein 5) [Source:UniProtKB/Swiss-Prot;Acc:Q9CQX3]
20297		ENSMUSG00000026166	20297	Ccl20	C-C motif chemokine 20 Precursor (Small-inducible cytokine A20)(Macrophage inflammatory protein 3 alpha)(MIP-3-alpha)(Liver and activation-regulated chemokine)(CC chemokine LARC)(Beta chemokine exodus-1)(CC chemokine ST38) [Source:UniProtKB/Swiss-Prot;Acc:O89093]
11504		ENSMUSG00000022893	11504	Adamts1	A disintegrin and metalloproteinase with thrombospondin motifs 1 Precursor (ADAMTS-1)(ADAM-TS 1)(ADAM-TS1)(EC 3.4.24.-) [Source:UniProtKB/Swiss-Prot;Acc:P97857]
56745		ENSMUSG00000017446	56745	C1qtnf1	Complement C1q tumor necrosis factor-related protein 1 Precursor (Putative secreted protein ZSIG37) [Source:UniProtKB/Swiss-Prot;Acc:Q9QXP7]
77914		ENSMUSG00000078252	77914	Krtap17-1	keratin associated protein 17-1 [Source:RefSeq peptide;Acc:NP_001093244]
16002		ENSMUSG00000048583	16002	Igf2	Insulin-like growth factor II Precursor (Multiplication-stimulating polypeptide)(IGF-II) [Contains Preptin] [Source:UniProtKB/Swiss-Prot;Acc:P09535]
13179		ENSMUSG00000019929	13179	Dcn	Decorin Precursor (Bone proteoglycan II)(PG-S2)(PG40) [Source:UniProtKB/Swiss-Prot;Acc:P28654]
83996		ENSMUSG00000041620	83996	Mmp1b	Interstitial collagenase B Precursor (EC 3.4.24.7)(Mcol-B)(Matrix metalloproteinase-1b)(MMP-1b) [Source:UniProtKB/Swiss-Prot;Acc:Q9EPL6]
12843		ENSMUSG00000029661	12843	Col1a2	Collagen alpha-2(I) chain Precursor (Alpha-2 type I collagen) [Source:UniProtKB/Swiss-Prot;Acc:Q01149]
22408		ENSMUSG00000022997	22408	Wnt1	Proto-oncogene protein Wnt-1 Precursor [Source:UniProtKB/Swiss-Prot;Acc:P04426]
17181		ENSMUSG00000022324	17181	Matn2	Matrilin-2 Precursor [Source:UniProtKB/Swiss-Prot;Acc:O08746]
21683		ENSMUSG00000037705	21683	Tecta	Alpha-tectorin Precursor [Source:UniProtKB/Swiss-Prot;Acc:O08523]
74116		ENSMUSG00000024011	74116	Pi16	Peptidase inhibitor 16 Precursor (Cysteine-rich protease inhibitor) [Source:UniProtKB/Swiss-Prot;Acc:Q9ET66]
22156		ENSMUSG00000005968	100042801 22156	Tuft1	Tuftelin [Source:UniProtKB/Swiss-Prot;Acc:O08970]
19063		ENSMUSG00000028657	19063	Ppt1	Palmitoyl-protein thioesterase 1 Precursor (PPT-1)(EC 3.1.2.22)(Palmitoyl-protein hydrolase 1) [Source:UniProtKB/Swiss-Prot;Acc:O88531]
20700		ENSMUSG00000066366	20700	Serpina1a	Alpha-1-antitrypsin 1-1 Precursor (AAT)(Serine protease inhibitor 1-1)(Serine protease inhibitor A1a)(Alpha-1 protease inhibitor 1)(Alpha-1-antiproteinase) [Source:UniProtKB/Swiss-Prot;Acc:P07758]
26970		ENSMUSG00000028751	26970	Pla2g2e	Group IIE secretory phospholipase A2 Precursor (GIIE sPLA2)(EC 3.1.1.4)(Phosphatidylcholine 2-acylhydrolase GIIE)(sPLA(2)-IIE) [Source:UniProtKB/Swiss-Prot;Acc:Q9QUL3]
67328		ENSMUSG00000024233	67328	Lyzl1	Lysozyme-like protein 1 Precursor (EC 3.2.1.17) [Source:UniProtKB/Swiss-Prot;Acc:Q9CPX3]
16948		ENSMUSG00000024529	16948	Lox	Protein-lysine 6-oxidase Precursor (EC 1.4.3.13)(Lysyl oxidase)(Ras excision protein) [Source:UniProtKB/Swiss-Prot;Acc:P28301]
11727		ENSMUSG00000072115	11727	Ang	Angiogenin Precursor (EC 3.1.27.-)(Angiogenin-1)(Ribonuclease 5)(RNase 5) [Source:UniProtKB/Swiss-Prot;Acc:P21570]
494448		ENSMUSG00000022421	494448 73340 504193	Nptxr	Chromobox protein homolog 6 [Source:UniProtKB/Swiss-Prot;Acc:Q9DBY5]
83995		ENSMUSG00000043089	83995	Mmp1a	Interstitial collagenase A Precursor (EC 3.4.24.7)(Mcol-A)(Matrix metalloproteinase-1a)(MMP-1a) [Source:UniProtKB/Swiss-Prot;Acc:Q9EPL5]
664883		ENSMUSG00000021047	664883	Nova1	RNA-binding protein Nova-1 (Neuro-oncological ventral antigen 1)(Ventral neuron-specific protein 1) [Source:UniProtKB/Swiss-Prot;Acc:Q9JKN6]
cellular component----endoplasmic reticulum----GO:0005783
C=606;O=178;E=135.82;R=1.31;rawP=2.19e-05;adjP=0.0011
12406		ENSMUSG00000070436	12406	Serpinh1	Serpin H1 Precursor (Collagen-binding protein)(Colligin)(47 kDa heat shock protein)(Serine protease inhibitor J6) [Source:UniProtKB/Swiss-Prot;Acc:P19324]
19671		ENSMUSG00000024889	19671	Rce1	CAAX prenyl protease 2 (EC 3.4.22.-)(Prenyl protein-specific endoprotease 2)(Farnesylated proteins-converting enzyme 2)(FACE-2)(RCE1 homolog) [Source:UniProtKB/Swiss-Prot;Acc:P57791]
64085		ENSMUSG00000032452	64085	Clstn2	Calsyntenin-2 Precursor (Alcadein-gamma)(Alc-gamma) [Source:UniProtKB/Swiss-Prot;Acc:Q9ER65]
67216		ENSMUSG00000020646	67216	Mboat2	Lysophospholipid acyltransferase 2 (LPLAT 2)(EC 2.3.1.-)(1-acylglycerophosphocholine O-acyltransferase)(EC 2.3.1.23)(Lysophosphatidylcholine acyltransferase)(Lyso-PC acyltransferase)(LPCAT)(Lysophosphatidylcholine acyltransferase 4)(Lyso-PC acyltransferase 4)(mLPCAT4)(1-acylglycerophosphoethanolamine O-acyltransferase)(EC 2.3.1.n2)(Lysophosphatidylethanolamine acyltransferase)(Lyso-PE acyltransfe…
13120		ENSMUSG00000028713	13120	Cyp4b1	Cytochrome P450 4B1 (EC 1.14.14.1)(CYPIVB1) [Source:UniProtKB/Swiss-Prot;Acc:Q64462]
14227		ENSMUSG00000056629	14227	Fkbp2	FK506-binding protein 2 Precursor (EC 5.2.1.8)(Peptidyl-prolyl cis-trans isomerase)(PPIase)(Rotamase)(13 kDa FKBP)(FKBP-13) [Source:UniProtKB/Swiss-Prot;Acc:P45878]
15002		ENSMUSG00000041538	15002	H2-Ob	histocompatibility 2, O region beta locus [Source:RefSeq peptide;Acc:NP_034519]
56325		ENSMUSG00000029408	56325	Abcb9	ATP-binding cassette sub-family B member 9 Precursor (ATP-binding cassette transporter 9)(ABC transporter 9 protein)(mABCB9)(TAP-like protein)(TAPL) [Source:UniProtKB/Swiss-Prot;Acc:Q9JJ59]
26611		ENSMUSG00000032320	26611	Rcn2	Reticulocalbin-2 Precursor (Taipoxin-associated calcium-binding protein 49)(TCBP-49) [Source:UniProtKB/Swiss-Prot;Acc:Q8BP92]
78232		ENSMUSG00000020993	78232	Trappc6b	Trafficking protein particle complex subunit 6B [Source:UniProtKB/Swiss-Prot;Acc:Q9D289]
100041727		ENSMUSG00000078974	100046229 100045433 100043039 100043027 100041727 100047287 20335 100042561	Sec61g	Protein transport protein Sec61 subunit gamma [Source:UniProtKB/Swiss-Prot;Acc:P60060]
103743		ENSMUSG00000035413	103743	Tmem98	Transmembrane protein 98 [Source:UniProtKB/Swiss-Prot;Acc:Q91X86]
76893		ENSMUSG00000015714	76893	Lass2	LAG1 longevity assurance homolog 2 (Translocating chain-associating membrane protein homolog 3)(TRAM homolog 3) [Source:UniProtKB/Swiss-Prot;Acc:Q924Z4]
20192		ENSMUSG00000057378	20192	Ryr3	ryanodine receptor 3 [Source:RefSeq peptide;Acc:NP_808320]
18295		ENSMUSG00000021390	18295	Ogn	Mimecan Precursor (Osteoglycin) [Source:UniProtKB/Swiss-Prot;Acc:Q62000]
19711		ENSMUSG00000033061	19711	Resp18	Regulated endocrine-specific protein 18 Precursor [Contains Regulated endocrine-specific protein 18;Triskadecapeptide] [Source:UniProtKB/Swiss-Prot;Acc:P47939]
13244		ENSMUSG00000038633	13244	Degs1	Sphingolipid delta(4)-desaturase DES1 (EC 1.14.-.-)(Degenerative spermatocyte homolog 1) [Source:UniProtKB/Swiss-Prot;Acc:O09005]
13200		ENSMUSG00000028757	13200	Ddost	Dolichyl-diphosphooligosaccharide--protein glycosyltransferase 48 kDa subunit Precursor (Oligosaccharyl transferase 48 kDa subunit)(DDOST 48 kDa subunit)(EC 2.4.1.119) [Source:UniProtKB/Swiss-Prot;Acc:O54734]
68563		ENSMUSG00000042737	68563	Dpm3	Dolichol-phosphate mannosyltransferase subunit 3 (Dolichyl-phosphate beta-D-mannosyltransferase subunit 3)(Dolichol-phosphate mannose synthase subunit 3)(DPM synthase complex subunit 3)(Mannose-P-dolichol synthase subunit 3)(MPD synthase subunit 3) [Source:UniProtKB/Swiss-Prot;Acc:Q9D1Q4]
223920		ENSMUSG00000023045	223920	Soat2	Sterol O-acyltransferase 2 (EC 2.3.1.26)(Cholesterol acyltransferase 2)(Acyl coenzyme A:cholesterol acyltransferase 2)(ACAT-2) [Source:UniProtKB/Swiss-Prot;Acc:O88908]
65969		ENSMUSG00000026726	65969	Cubn	Cubilin Precursor (Intrinsic factor-cobalamin receptor) [Source:UniProtKB/Swiss-Prot;Acc:Q9JLB4]
11945		ENSMUSG00000031449	11945	Atp4b	Potassium-transporting ATPase subunit beta (Proton pump beta chain)(Gastric H(+)/K(+) ATPase subunit beta) [Source:UniProtKB/Swiss-Prot;Acc:P50992]
67181		ENSMUSG00000018559	67181 100048221	Dullard	Serine/threonine-protein phosphatase dullard (EC 3.1.3.16) [Source:UniProtKB/Swiss-Prot;Acc:Q3TP92]
13107		ENSMUSG00000052974	13107	Cyp2f2	Cytochrome P450 2F2 (EC 1.14.14.-)(CYPIIF2)(Naphthalene dehydrogenase)(Naphthalene hydroxylase)(P450-NAH-2) [Source:UniProtKB/Swiss-Prot;Acc:P33267]
54208		ENSMUSG00000030654	54208	Arl6ip1	ADP-ribosylation factor-like protein 6-interacting protein 1 (ARL-6-interacting protein 1)(Aip-1)(Protein TBX2) [Source:UniProtKB/Swiss-Prot;Acc:Q9JKW0]
12351		ENSMUSG00000000805	12351	Car4	Carbonic anhydrase 4 Precursor (EC 4.2.1.1)(Carbonic anhydrase IV)(CA-IV)(Carbonate dehydratase IV) [Source:UniProtKB/Swiss-Prot;Acc:Q64444]
14763		ENSMUSG00000039904	14763	Gpr37	Probable G-protein coupled receptor 37 Precursor [Source:UniProtKB/Swiss-Prot;Acc:Q9QY42]
12359		ENSMUSG00000027187	12359	Cat	Catalase (EC 1.11.1.6) [Source:UniProtKB/Swiss-Prot;Acc:P24270]
14261		ENSMUSG00000040181	14261	Fmo1	Dimethylaniline monooxygenase [N-oxide-forming] 1 (EC 1.14.13.8)(Hepatic flavin-containing monooxygenase 1)(FMO 1)(Dimethylaniline oxidase 1) [Source:UniProtKB/Swiss-Prot;Acc:P50285]
80286		ENSMUSG00000039530	80286	Tusc3	tumor suppressor candidate 3 [Source:RefSeq peptide;Acc:NP_084530]
109754		ENSMUSG00000018042	109754	Cyb5r3	NADH-cytochrome b5 reductase 3 (Cytochrome b5 reductase)(B5R)(EC 1.6.2.2)(Diaphorase-1) [Contains NADH-cytochrome b5 reductase 3 membrane-bound form;NADH-cytochrome b5 reductase 3 soluble form] [Source:UniProtKB/Swiss-Prot;Acc:Q9DCN2]
57743		ENSMUSG00000025816	57743	Sec61a2	Protein transport protein Sec61 subunit alpha isoform 2 (Sec61 alpha-2) [Source:UniProtKB/Swiss-Prot;Acc:Q9JLR1]
101502		ENSMUSG00000042289	101502	Hsd3b7	3 beta-hydroxysteroid dehydrogenase type 7 (3 beta-hydroxysteroid dehydrogenase type VII)(3-beta-HSD VII)(3-beta-hydroxy-Delta(5)-C27 steroid oxidoreductase)(C(27) 3-beta-HSD)(EC 1.1.1.-)(Cholest-5-ene-3-beta,7-alpha-diol 3-beta-dehydrogenase)(EC 1.1.1.181) [Source:UniProtKB/Swiss-Prot;Acc:Q9EQC1]
17313		ENSMUSG00000030218	17313	Mgp	Matrix Gla protein Precursor (MGP) [Source:UniProtKB/Swiss-Prot;Acc:P19788]
11881		ENSMUSG00000042082	11881	Arsb	Arylsulfatase B Precursor (ASB)(EC 3.1.6.12)(N-acetylgalactosamine-4-sulfatase)(G4S) [Source:UniProtKB/Swiss-Prot;Acc:P50429]
67458		ENSMUSG00000001576	67458	Ergic1	Endoplasmic reticulum-Golgi intermediate compartment protein 1 (ER-Golgi intermediate compartment 32 kDa protein)(ERGIC-32) [Source:UniProtKB/Swiss-Prot;Acc:Q9DC16]
50790		ENSMUSG00000031278	50790	Acsl4	Long-chain-fatty-acid--CoA ligase 4 (EC 6.2.1.3)(Long-chain acyl-CoA synthetase 4)(LACS 4)(mACS4) [Source:UniProtKB/Swiss-Prot;Acc:Q9QUJ7]
16913		ENSMUSG00000024338	16913	Psmb8	Proteasome subunit beta type-8 Precursor (EC 3.4.25.1)(Proteasome subunit beta-5i)(Proteasome component C13)(Macropain subunit C13)(Multicatalytic endopeptidase complex subunit C13) [Source:UniProtKB/Swiss-Prot;Acc:P28063]
22059		ENSMUSG00000059552	22059	Trp53	Cellular tumor antigen p53 (Tumor suppressor p53) [Source:UniProtKB/Swiss-Prot;Acc:P02340]
100044633		ENSMUSG00000079317	66226 100044633	Trappc2	Trafficking protein particle complex subunit 2 (Sedlin) [Source:UniProtKB/Swiss-Prot;Acc:Q9CQP2]
109637		ENSMUSG00000006313	109637	Upk1a	Uroplakin-1a (UP1a)(Uroplakin Ia)(UPIa)(UPKa) [Source:UniProtKB/Swiss-Prot;Acc:Q9D132]
13095		ENSMUSG00000003053	13095	Cyp2c29	Cytochrome P450 2C29 (EC 1.14.14.1)(CYPIIC29)(P-450 MUT-2)(Aldehyde oxygenase) [Source:UniProtKB/Swiss-Prot;Acc:Q64458]
67454		ENSMUSG00000019975	67454	1200009F10Rik	Inhibitor of nuclear factor kappa-B kinase-interacting protein (I kappa-B kinase interacting protein)(IKK-interacting protein) [Source:UniProtKB/Swiss-Prot;Acc:Q9DBZ1]
100047898		ENSMUSG00000054766	56086 100047898 671392	Set	Protein SET (Phosphatase 2A inhibitor I2PP2A)(I-2PP2A)(Template-activating factor I)(TAF-I) [Source:UniProtKB/Swiss-Prot;Acc:Q9EQU5]
102294		ENSMUSG00000079057	102294	Cyp4v3	Cytochrome P450 4V3 (EC 1.14.-.-) [Source:UniProtKB/Swiss-Prot;Acc:Q9DBW0]
16205		ENSMUSG00000044867	16205	Gimap1	GTPase IMAP family member 1 (Immunity-associated protein 1)(Immune-associated protein 38)(IAP38) [Source:UniProtKB/Swiss-Prot;Acc:P70224]
18548		ENSMUSG00000021587	18548	Pcsk1	Neuroendocrine convertase 1 Precursor (NEC 1)(EC 3.4.21.93)(Prohormone convertase 1)(Proprotein convertase 1)(PC1)(PC3)(Furin homolog)(Propeptide-processing protease) [Source:UniProtKB/Swiss-Prot;Acc:P63239]
76510		ENSMUSG00000047921	76510	Trappc9	Trafficking protein particle complex subunit 9 (NIK- and IKBKB-binding protein) [Source:UniProtKB/Swiss-Prot;Acc:Q3U0M1]
67758		ENSMUSG00000027761	67758	Aadac	Arylacetamide deacetylase (AADAC)(EC 3.1.1.-) [Source:UniProtKB/Swiss-Prot;Acc:Q99PG0]
67864		ENSMUSG00000024072	67864	Yipf4	Protein YIPF4 (YIP1 family member 4) [Source:UniProtKB/Swiss-Prot;Acc:Q8C407]
50490		ENSMUSG00000030562	50490	Nox4	NADPH oxidase 4 (EC 1.6.3.-)(Superoxide-generating NADPH oxidase 4)(Kidney superoxide-producing NADPH oxidase)(Kox-1)(Renal NAD(P)H-oxidase) [Source:UniProtKB/Swiss-Prot;Acc:Q9JHI8]
14618		ENSMUSG00000047797	14618	Gjb1	Gap junction beta-1 protein (Connexin-32)(Cx32) [Source:UniProtKB/Swiss-Prot;Acc:P28230]
65106		ENSMUSG00000035199	65106	Arl6ip5	PRA1 family protein 3 (ADP-ribosylation factor-like protein 6-interacting protein 5)(ARL-6-interacting protein 5)(Aip-5)(Glutamate transporter EAAC1-interacting protein)(GTRAP3-18)(Prenylated Rab acceptor protein 2)(Protein JWa)(Addicsin) [Source:UniProtKB/Swiss-Prot;Acc:Q8R5J9]
56442		ENSMUSG00000019877	56442	Serinc1	Serine incorporator 1 (Tumor differentially expressed protein 2)(Tumor differentially expressed 1 protein-like)(Membrane protein TMS-2)(Axotomy-induced glyco/Golgi protein 2) [Source:UniProtKB/Swiss-Prot;Acc:Q9QZI8]
73166		ENSMUSG00000024799	73166	Tm7sf2	Delta(14)-sterol reductase (Delta-14-SR)(EC 1.3.1.70)(C-14 sterol reductase)(Sterol C14-reductase)(Transmembrane 7 superfamily member 2) [Source:UniProtKB/Swiss-Prot;Acc:Q71KT5]
66889		ENSMUSG00000031438	66889	Rnf128	E3 ubiquitin-protein ligase RNF128 Precursor (EC 6.3.2.-)(RING finger protein 128)(Gene related to anergy in lymphocytes protein)(Goliath-related E3 ubiquitin-protein ligase 1) [Source:UniProtKB/Swiss-Prot;Acc:Q9D304]
74122		ENSMUSG00000030095	74122	Tmem43	Transmembrane protein 43 (Protein LUMA) [Source:UniProtKB/Swiss-Prot;Acc:Q9DBS1]
56615		ENSMUSG00000008540	56615	Mgst1	Microsomal glutathione S-transferase 1 (Microsomal GST-1)(EC 2.5.1.18)(Microsomal GST-I) [Source:UniProtKB/Swiss-Prot;Acc:Q91VS7]
66190		ENSMUSG00000030760	66190	Acer3	Alkaline ceramidase 3 (Alkaline CDase 3)(AlkCDase 3)(EC 3.5.1.-)(Alkaline phytoceramidase)(aPHC) [Source:UniProtKB/Swiss-Prot;Acc:Q9D099]
19285		ENSMUSG00000004044	19285	Ptrf	Polymerase I and transcript release factor [Source:UniProtKB/Swiss-Prot;Acc:O54724]
11690		ENSMUSG00000060063	11690	Alox5ap	Arachidonate 5-lipoxygenase-activating protein (FLAP)(MK-886-binding protein) [Source:UniProtKB/Swiss-Prot;Acc:P30355]
67180		ENSMUSG00000024487	67180	Yipf5	Protein YIPF5 (YIP1 family member 5)(YPT-interacting protein 1 A) [Source:UniProtKB/Swiss-Prot;Acc:Q9EQQ2]
13482		ENSMUSG00000035000	13482	Dpp4	Dipeptidyl peptidase 4 (EC 3.4.14.5)(Dipeptidyl peptidase IV)(DPP IV)(T-cell activation antigen CD26)(Thymocyte-activating molecule)(THAM)(CD26 antigen) [Contains Dipeptidyl peptidase 4 membrane form(Dipeptidyl peptidase IV membrane form);Dipeptidyl peptidase 4 soluble form(Dipeptidyl peptidase IV soluble form)] [Source:UniProtKB/Swiss-Prot;Acc:P28843]
15979		ENSMUSG00000020009	15979	Ifngr1	Interferon-gamma receptor alpha chain Precursor (IFN-gamma-R1)(CD119 antigen) [Source:UniProtKB/Swiss-Prot;Acc:P15261]
83493		ENSMUSG00000025240	83493	Sacm1l	Phosphatidylinositide phosphatase SAC1 (EC 3.1.3.-)(Suppressor of actin mutations 1-like protein) [Source:UniProtKB/Swiss-Prot;Acc:Q9EP69]
72082		ENSMUSG00000025002	72082	Cyp2c55	Cytochrome P450 2C55 (EC 1.14.14.1)(CYPIIC55) [Source:UniProtKB/Swiss-Prot;Acc:Q9D816]
27055		ENSMUSG00000029781	27055	Fkbp9	FK506-binding protein 9 Precursor (EC 5.2.1.8)(Peptidyl-prolyl cis-trans isomerase)(PPIase)(Rotamase)(FKBP65RS) [Source:UniProtKB/Swiss-Prot;Acc:Q9Z247]
13726		ENSMUSG00000001964	13726	Emd	Emerin [Source:UniProtKB/Swiss-Prot;Acc:O08579]
229725		ENSMUSG00000027884	229725	Clcc1	Chloride channel CLIC-like protein 1 Precursor [Source:UniProtKB/Swiss-Prot;Acc:Q99LI2]
68137		ENSMUSG00000002778	68137	Kdelr1	ER lumen protein retaining receptor 1 (KDEL endoplasmic reticulum protein retention receptor 1)(KDEL receptor 1) [Source:UniProtKB/Swiss-Prot;Acc:Q99JH8]
72898		ENSMUSG00000029348	72898	Asphd2	Aspartate beta-hydroxylase domain-containing protein 2 (EC 1.14.11.-) [Source:UniProtKB/Swiss-Prot;Acc:Q80VP9]
67211		ENSMUSG00000038525	67211	Armc10	Armadillo repeat-containing protein 10 [Source:UniProtKB/Swiss-Prot;Acc:Q9D0L7]
13595		ENSMUSG00000031168	13595	Ebp	3-beta-hydroxysteroid-Delta(8),Delta(7)-isomerase (EC 5.3.3.5)(Cholestenol Delta-isomerase)(Delta(8)-Delta(7) sterol isomerase)(D8-D7 sterol isomerase)(Emopamil-binding protein) [Source:UniProtKB/Swiss-Prot;Acc:P70245]
18451		ENSMUSG00000019916	18451	P4ha1	Prolyl 4-hydroxylase subunit alpha-1 Precursor (EC 1.14.11.2)(4-PH alpha-1)(Procollagen-proline,2-oxoglutarate-4-dioxygenase subunit alpha-1) [Source:UniProtKB/Swiss-Prot;Acc:Q60715]
18145		ENSMUSG00000024413	18145	Npc1	Niemann-Pick C1 protein Precursor [Source:UniProtKB/Swiss-Prot;Acc:O35604]
18764		ENSMUSG00000034462	18764	Pkd2	Polycystin-2 (Polycystic kidney disease 2 protein homolog) [Source:UniProtKB/Swiss-Prot;Acc:O35245]
14950		ENSMUSG00000019188	14950	H13	Minor histocompatibility antigen H13 (EC 3.4.23.-)(Signal peptide peptidase)(Presenilin-like protein 3) [Source:UniProtKB/Swiss-Prot;Acc:Q9D8V0]
67091		ENSMUSG00000002043	67091	Trappc6a	Trafficking protein particle complex subunit 6A (TRAPP complex subunit 6A) [Source:UniProtKB/Swiss-Prot;Acc:Q78XR0]
94180		ENSMUSG00000032281	94180	Acsbg1	Long-chain-fatty-acid--CoA ligase ACSBG1 (EC 6.2.1.3)(Acyl-CoA synthetase bubblegum family member 1)(mBG1)(Lipodisin)(Gonadotropin-regulated long chain acyl CoA synthetase)(GR-LACS) [Source:UniProtKB/Swiss-Prot;Acc:Q99PU5]
15953		ENSMUSG00000078920	15953	Ifi47	interferon gamma inducible protein 47 [Source:RefSeq peptide;Acc:NP_032356]
13123		ENSMUSG00000039519	13123	Cyp7b1	25-hydroxycholesterol 7-alpha-hydroxylase (Oxysterol 7-alpha-hydroxylase)(EC 1.14.13.100)(Cytochrome P450 7B1)(HCT-1) [Source:UniProtKB/Swiss-Prot;Acc:Q60991]
19682		ENSMUSG00000025350	19682	Rdh5	retinol dehydrogenase 5 [Source:RefSeq peptide;Acc:NP_598767]
27973		ENSMUSG00000030804	27973	Vkorc1	Vitamin K epoxide reductase complex subunit 1 (EC 1.1.4.1)(Vitamin K1 2,3-epoxide reductase subunit 1) [Source:UniProtKB/Swiss-Prot;Acc:Q9CRC0]
20250		ENSMUSG00000025203	20250	Scd2	Acyl-CoA desaturase 2 (EC 1.14.19.1)(Stearoyl-CoA desaturase 2)(Fatty acid desaturase 2)(Delta(9)-desaturase 2) [Source:UniProtKB/Swiss-Prot;Acc:P13011]
68393		ENSMUSG00000012187	68393 100047046	Mogat1	2-acylglycerol O-acyltransferase 1 (EC 2.3.1.22)(Monoacylglycerol O-acyltransferase 1)(Acyl CoA:monoacylglycerol acyltransferase 1)(MGAT1)(Diacylglycerol acyltransferase 2-like protein 1) [Source:UniProtKB/Swiss-Prot;Acc:Q91ZV4]
20168		ENSMUSG00000024758	20168	Rtn3	Reticulon-3 [Source:UniProtKB/Swiss-Prot;Acc:Q9ES97]
13036		ENSMUSG00000032359	13036	Ctsh	Cathepsin H Precursor (EC 3.4.22.16)(Cathepsin B3)(Cathepsin BA) [Contains Cathepsin H mini chain;Cathepsin H heavy chain;Cathepsin H light chain] [Source:UniProtKB/Swiss-Prot;Acc:P49935]
18701		ENSMUSG00000024145	18701	Pigf	Phosphatidylinositol-glycan biosynthesis class F protein (PIG-F) [Source:UniProtKB/Swiss-Prot;Acc:O09101]
66940		ENSMUSG00000025647	66940	Shisa5	Protein shisa-5 Precursor (Scotin) [Source:UniProtKB/Swiss-Prot;Acc:Q9D7I0]
58193		ENSMUSG00000027963	58193	Extl2	Exostosin-like 2 (EC 2.4.1.223)(Glucuronyl-galactosyl-proteoglycan 4-alpha-N-acetylglucosaminyltransferase)(Alpha-1,4-N-acetylhexosaminyltransferase EXTL2)(Alpha-GalNAcT EXTL2)(EXT-related protein 2) [Source:UniProtKB/Swiss-Prot;Acc:Q9ES89]
56173		ENSMUSG00000047109	56173	Cldn14	Claudin-14 [Source:UniProtKB/Swiss-Prot;Acc:Q9Z0S3]
407243		ENSMUSG00000019755	407243	Tmem189	Transmembrane protein 189 [Source:UniProtKB/Swiss-Prot;Acc:Q99LQ7]
19165		ENSMUSG00000010609	19165	Psen2	Presenilin-2 (PS-2)(EC 3.4.23.-) [Contains Presenilin-2 NTF subunit;Presenilin-2 CTF subunit] [Source:UniProtKB/Swiss-Prot;Acc:Q61144]
75909		ENSMUSG00000018171	75909	Tmem49	Transmembrane protein 49 (Vacuole membrane protein 1)(NF-E2-inducible protein 2)(Protein ni-2) [Source:UniProtKB/Swiss-Prot;Acc:Q99KU0]
16430		ENSMUSG00000032116	16430	Stt3a	Dolichyl-diphosphooligosaccharide--protein glycosyltransferase subunit STT3A (Oligosaccharyl transferase subunit STT3A)(STT3-A)(EC 2.4.1.119)(B5)(Integral membrane protein 1) [Source:UniProtKB/Swiss-Prot;Acc:P46978]
20775		ENSMUSG00000022351	20775	Sqle	Squalene monooxygenase (EC 1.14.99.7)(Squalene epoxidase)(SE) [Source:UniProtKB/Swiss-Prot;Acc:P52019]
13077		ENSMUSG00000032310	13077	Cyp1a2	Cytochrome P450 1A2 (EC 1.14.14.1)(CYPIA2)(P450-P2/P450-P3) [Source:UniProtKB/Swiss-Prot;Acc:P00186]
13853		ENSMUSG00000055493	13853	Epm2a	Laforin (EC 3.1.3.48)(EC 3.1.3.16)(Lafora PTPase)(LAFPTPase) [Source:UniProtKB/Swiss-Prot;Acc:Q9WUA5]
20338		ENSMUSG00000020964	20338	Sel1l	Protein sel-1 homolog 1 Precursor (Suppressor of lin-12-like protein 1)(Sel-1L) [Source:UniProtKB/Swiss-Prot;Acc:Q9Z2G6]
15492		ENSMUSG00000027871	15492	Hsd3b1	3 beta-hydroxysteroid dehydrogenase/Delta 5-->4-isomerase type 1 (3-beta-HSD I) [Includes 3-beta-hydroxy-Delta(5)-steroid dehydrogenase(EC 1.1.1.145)(3-beta-hydroxy-5-ene steroid dehydrogenase)(Progesterone reductase);Steroid Delta-isomerase(EC 5.3.3.1)(Delta-5-3-ketosteroid isomerase)] [Source:UniProtKB/Swiss-Prot;Acc:P24815]
66964		ENSMUSG00000030245	66964	Golt1b	Vesicle transport protein GOT1B (Golgi transport 1 homolog B) [Source:UniProtKB/Swiss-Prot;Acc:Q9CR60]
69187		ENSMUSG00000030219	69187	Erp27	Endoplasmic reticulum resident protein ERp27 Precursor [Source:UniProtKB/Swiss-Prot;Acc:Q9D8U3]
12317		ENSMUSG00000003814	12317	Calr	Calreticulin Precursor (CRP55)(Calregulin)(HACBP)(ERp60) [Source:UniProtKB/Swiss-Prot;Acc:P14211]
20397		ENSMUSG00000020097	20397	Sgpl1	Sphingosine-1-phosphate lyase 1 (SP-lyase)(mSPL)(EC 4.1.2.27)(Sphingosine-1-phosphate aldolase) [Source:UniProtKB/Swiss-Prot;Acc:Q8R0X7]
21983		ENSMUSG00000035274	21983	Tpbg	Trophoblast glycoprotein Precursor (5T4 oncofetal trophoblast glycoprotein)(5T4 oncotrophoblast glycoprotein) [Source:UniProtKB/Swiss-Prot;Acc:Q9Z0L0]
14263		ENSMUSG00000028088	100046051 14263	Fmo5	Dimethylaniline monooxygenase [N-oxide-forming] 5 (EC 1.14.13.8)(Hepatic flavin-containing monooxygenase 5)(FMO 5)(Dimethylaniline oxidase 5) [Source:UniProtKB/Swiss-Prot;Acc:P97872]
20249		ENSMUSG00000037071	20249	Scd1	Acyl-CoA desaturase 1 (EC 1.14.19.1)(Stearoyl-CoA desaturase 1)(Fatty acid desaturase 1)(Delta(9)-desaturase 1) [Source:UniProtKB/Swiss-Prot;Acc:P13516]
56085		ENSMUSG00000005312	56085	Ubqln1	Ubiquilin-1 (Protein linking IAP with cytoskeleton 1)(PLIC-1) [Source:UniProtKB/Swiss-Prot;Acc:Q8R317]
19223		ENSMUSG00000017969	19223	Ptgis	Prostacyclin synthase (EC 5.3.99.4)(Prostaglandin I2 synthase) [Source:UniProtKB/Swiss-Prot;Acc:O35074]
76279		ENSMUSG00000022445	76279	Cyp2d26	Cytochrome P450 2D26 (EC 1.14.14.1)(CYPIID26) [Source:UniProtKB/Swiss-Prot;Acc:Q8CIM7]
76338		ENSMUSG00000022159	76338	Rab2b	Ras-related protein Rab-2B [Source:UniProtKB/Swiss-Prot;Acc:P59279]
76267		ENSMUSG00000010663	76267	Fads1	Fatty acid desaturase 1 (EC 1.14.19.-)(Delta(5) fatty acid desaturase)(Delta(5) desaturase)(D5D) [Source:UniProtKB/Swiss-Prot;Acc:Q920L1]
11450		ENSMUSG00000022878	11450	Adipoq	Adiponectin Precursor (Adipocyte, C1q and collagen domain-containing protein)(30 kDa adipocyte complement-related protein)(Adipocyte complement-related 30 kDa protein)(ACRP30)(Adipocyte-specific protein AdipoQ) [Source:UniProtKB/Swiss-Prot;Acc:Q60994]
13114		ENSMUSG00000038656	13114	Cyp3a16	Cytochrome P450 3A16 (EC 1.14.14.1)(CYPIIIA16) [Source:UniProtKB/Swiss-Prot;Acc:Q64481]
11640		ENSMUSG00000018428	11640	Akap1	A kinase anchor protein 1, mitochondrial Precursor (Protein kinase A-anchoring protein 1)(PRKA1)(Dual specificity A-kinase-anchoring protein 1)(D-AKAP-1)(Spermatid A-kinase anchor protein)(S-AKAP) [Source:UniProtKB/Swiss-Prot;Acc:O08715]
17153		ENSMUSG00000027375	17153	Mal	Myelin and lymphocyte protein (T-lymphocyte maturation-associated protein) [Source:UniProtKB/Swiss-Prot;Acc:O09198]
72050		ENSMUSG00000026047	72050	Kdelc1	KDEL motif-containing protein 1 Precursor (Endoplasmic reticulum resident protein 58)(ER protein 58) [Source:UniProtKB/Swiss-Prot;Acc:Q9JHP7]
56177		ENSMUSG00000026833	56177	Olfm1	Noelin Precursor (Neuronal olfactomedin-related ER localized protein)(Olfactomedin-1)(Pancortin) [Source:UniProtKB/Swiss-Prot;Acc:O88998]
67511		ENSMUSG00000058569	67511	Tmed9	Transmembrane emp24 domain-containing protein 9 Precursor (Glycoprotein 25L2) [Source:UniProtKB/Swiss-Prot;Acc:Q99KF1]
13117		ENSMUSG00000066072	674298 13117 666168	Cyp4a10	Cytochrome P450 4A10 (CYPIVA10)(Lauric acid omega-hydroxylase)(EC 1.14.15.3)(P450-LA-omega 1)(P452) [Source:UniProtKB/Swiss-Prot;Acc:O88833]
70377		ENSMUSG00000009092	70377	Derl3	Derlin-3 (Der1-like protein 3)(Degradation in endoplasmic reticulum protein 3)(Protein IZP6) [Source:UniProtKB/Swiss-Prot;Acc:Q9D8K3]
58520		ENSMUSG00000021252	58520	0610007P14Rik	Probable ergosterol biosynthetic protein 28 [Source:UniProtKB/Swiss-Prot;Acc:Q9ERY9]
20393		ENSMUSG00000019970	20393	Sgk1	Serine/threonine-protein kinase Sgk1 (EC 2.7.11.1)(Serum/glucocorticoid-regulated kinase 1) [Source:UniProtKB/Swiss-Prot;Acc:Q9WVC6]
14960		ENSMUSG00000036594	14960	H2-Ea	H-2 class II histocompatibility antigen, A-B alpha chain Precursor (IAalpha) [Source:UniProtKB/Swiss-Prot;Acc:P14434]
27967		ENSMUSG00000052488	27967	Cherp	Calcium homeostasis endoplasmic reticulum protein (SR-related CTD-associated factor 6) [Source:UniProtKB/Swiss-Prot;Acc:Q8CGZ0]
13098		ENSMUSG00000025003	13098	Cyp2c39	Cytochrome P450 2C39 (EC 1.14.14.1)(CYPIIC39) [Source:UniProtKB/Swiss-Prot;Acc:P56656]
18700		ENSMUSG00000031381	18700	Piga	N-acetylglucosaminyl-phosphatidylinositol biosynthetic protein (GlcNAc-PI synthesis protein)(Phosphatidylinositol-glycan biosynthesis class A protein)(PIG-A) [Source:UniProtKB/Swiss-Prot;Acc:Q64323]
15357		ENSMUSG00000021670	15357	Hmgcr	3-hydroxy-3-methylglutaryl-coenzyme A reductase (HMG-CoA reductase)(EC 1.1.1.34) [Source:UniProtKB/Swiss-Prot;Acc:Q01237]
142980		ENSMUSG00000031639	142980	Tlr3	Toll-like receptor 3 Precursor (CD283 antigen) [Source:UniProtKB/Swiss-Prot;Acc:Q99MB1]
193813		ENSMUSG00000024150	193813	Mcfd2	Multiple coagulation factor deficiency protein 2 homolog Precursor (Neural stem cell-derived neuronal survival protein) [Source:UniProtKB/Swiss-Prot;Acc:Q8K5B2]
22213		ENSMUSG00000009293	22213	Ube2g2	Ubiquitin-conjugating enzyme E2 G2 (EC 6.3.2.19)(Ubiquitin-protein ligase G2)(Ubiquitin carrier protein G2) [Source:UniProtKB/Swiss-Prot;Acc:P60605]
20652		ENSMUSG00000026600	20652	Soat1	Sterol O-acyltransferase 1 (EC 2.3.1.26)(Cholesterol acyltransferase 1)(Acyl coenzyme A:cholesterol acyltransferase 1)(ACAT-1) [Source:UniProtKB/Swiss-Prot;Acc:Q61263]
109672		ENSMUSG00000024646	109672	Cyb5	Cytochrome b5 [Source:UniProtKB/Swiss-Prot;Acc:P56395]
53322		ENSMUSG00000030659	53322	Nucb2	Nucleobindin-2 Precursor (DNA-binding protein NEFA) [Source:UniProtKB/Swiss-Prot;Acc:P81117]
57340		ENSMUSG00000025318	57340	Jph3	Junctophilin-3 (Junctophilin type 3)(JP-3) [Source:UniProtKB/Swiss-Prot;Acc:Q9ET77]
94224		ENSMUSG00000038541	94224	Srd5a2	3-oxo-5-alpha-steroid 4-dehydrogenase 2 (EC 1.3.99.5)(Steroid 5-alpha-reductase 2)(5 alpha-SR2)(SR type 2) [Source:UniProtKB/Swiss-Prot;Acc:Q99N99]
18821		ENSMUSG00000038583	18821	Pln	Cardiac phospholamban (PLB) [Source:UniProtKB/Swiss-Prot;Acc:P61014]
52377		ENSMUSG00000019539	52377	Rcn3	Reticulocalbin-3 Precursor [Source:UniProtKB/Swiss-Prot;Acc:Q8BH97]
72043		ENSMUSG00000006800	72043	Sulf2	Extracellular sulfatase Sulf-2 Precursor (EC 3.1.6.-)(MSulf-2) [Source:UniProtKB/Swiss-Prot;Acc:Q8CFG0]
56453		ENSMUSG00000031835	56453	Mbtps1	Membrane-bound transcription factor site-1 protease Precursor (EC 3.4.21.112)(S1P endopeptidase)(Site-1 protease)(Subtilisin/kexin isozyme 1)(SKI-1)(Sterol-regulated luminal protease) [Source:UniProtKB/Swiss-Prot;Acc:Q9WTZ2]
76025		ENSMUSG00000025575	76025	Cant1	Soluble calcium-activated nucleotidase 1 (SCAN-1)(EC 3.6.1.6)(Apyrase homolog) [Source:UniProtKB/Swiss-Prot;Acc:Q8VCF1]
16976		ENSMUSG00000029103	16976	Lrpap1	Alpha-2-macroglobulin receptor-associated protein Precursor (Alpha-2-MRAP)(Low density lipoprotein receptor-related protein-associated protein 1)(RAP)(Heparin-binding protein 44)(HBP-44) [Source:UniProtKB/Swiss-Prot;Acc:P55302]
67556		ENSMUSG00000050229	67556	Pigm	GPI mannosyltransferase 1 (EC 2.4.1.-)(GPI mannosyltransferase I)(GPI-MT-I)(Phosphatidylinositol-glycan biosynthesis class M protein)(PIG-M) [Source:UniProtKB/Swiss-Prot;Acc:Q8C2R7]
17957		ENSMUSG00000027438	17957	Napb	Beta-soluble NSF attachment protein (SNAP-beta)(N-ethylmaleimide-sensitive factor attachment protein beta)(Brain protein I47) [Source:UniProtKB/Swiss-Prot;Acc:P28663]
66234		ENSMUSG00000031604	66234	Sc4mol	C-4 methylsterol oxidase (EC 1.14.13.72)(Methylsterol monooxygenase) [Source:UniProtKB/Swiss-Prot;Acc:Q9CRA4]
12847		ENSMUSG00000026553	12847	Copa	Coatomer subunit alpha (Alpha-coat protein)(Alpha-COP) [Contains Xenin(Xenopsin-related peptide);Proxenin] [Source:UniProtKB/Swiss-Prot;Acc:Q8CIE6]
13088		ENSMUSG00000030483	13088	Cyp2b10	Cytochrome P450 2B10 (EC 1.14.14.1)(CYPIIB10)(Testosterone 16-alpha hydroxylase)(P450-16-alpha)(Clone PF3/46)(Cytochrome P450 2B20)(CYPIIB20)(P24) [Source:UniProtKB/Swiss-Prot;Acc:P12791]
12389		ENSMUSG00000007655	12389	Cav1	Caveolin-1 [Source:UniProtKB/Swiss-Prot;Acc:P49817]
81910		ENSMUSG00000027422	81910	Rrbp1	ribosome binding protein 1 isoform b [Source:RefSeq peptide;Acc:NP_598329]
107513		ENSMUSG00000021427	107513 636537	Ssr1	Translocon-associated protein subunit alpha Precursor (TRAP-alpha)(Signal sequence receptor subunit alpha)(SSR-alpha) [Source:UniProtKB/Swiss-Prot;Acc:Q9CY50]
14654		ENSMUSG00000000263	100044359 14654	Glra1	Glycine receptor subunit alpha-1 Precursor (Glycine receptor 48 kDa subunit)(Glycine receptor strychnine-binding subunit) [Source:UniProtKB/Swiss-Prot;Acc:Q64018]
19224		ENSMUSG00000047250	19224	Ptgs1	Prostaglandin G/H synthase 1 Precursor (EC 1.14.99.1)(Cyclooxygenase-1)(COX-1)(Prostaglandin-endoperoxide synthase 1)(Prostaglandin H2 synthase 1)(PGH synthase 1)(PGHS-1)(PHS 1) [Source:UniProtKB/Swiss-Prot;Acc:P22437]
433256		ENSMUSG00000024981	433256	Acsl5	Long-chain-fatty-acid--CoA ligase 5 (EC 6.2.1.3)(Long-chain acyl-CoA synthetase 5)(LACS 5) [Source:UniProtKB/Swiss-Prot;Acc:Q8JZR0]
19225		ENSMUSG00000032487	19225	Ptgs2	Prostaglandin G/H synthase 2 Precursor (EC 1.14.99.1)(Cyclooxygenase-2)(COX-2)(Prostaglandin-endoperoxide synthase 2)(Prostaglandin H2 synthase 2)(PGH synthase 2)(PGHS-2)(PHS II)(Glucocorticoid-regulated inflammatory cyclooxygenase)(Gripghs)(TIS10 protein)(Macrophage activation-associated marker protein P71/73)(PES-2) [Source:UniProtKB/Swiss-Prot;Acc:Q05769]
74186		ENSMUSG00000026676	74186	Ccdc3	Coiled-coil domain-containing protein 3 Precursor [Source:UniProtKB/Swiss-Prot;Acc:Q9D6Y1]
13124		ENSMUSG00000050445	13124	Cyp8b1	7-alpha-hydroxycholest-4-en-3-one 12-alpha-hydroxylase (EC 1.14.13.95)(Cytochrome P450 8B1)(CYPVIIIB1)(7-alpha-hydroxy-4-cholesten-3-one 12-alpha-hydroxylase)(Sterol 12-alpha-hydroxylase) [Source:UniProtKB/Swiss-Prot;Acc:O88962]
13097		ENSMUSG00000032808	13097 639008	Cyp2c38	Cytochrome P450 2C38 (EC 1.14.14.1)(CYPIIC38) [Source:UniProtKB/Swiss-Prot;Acc:P56655]
13119		ENSMUSG00000028715	13119	Cyp4a14	Cytochrome P450 4A14 Precursor (CYPIVA14)(Lauric acid omega-hydroxylase 3)(EC 1.14.15.3)(P450-LA-omega 3) [Source:UniProtKB/Swiss-Prot;Acc:O35728]
72512		ENSMUSG00000024349	72512	Tmem173	Transmembrane protein 173 (Stimulator of interferon genes protein)(mSTING)(Mediator of IRF3 activation)(MMITA) [Source:UniProtKB/Swiss-Prot;Acc:Q3TBT3]
30934		ENSMUSG00000026848	30934	Tor1b	Torsin-1B Precursor (Torsin family 1 member B) [Source:UniProtKB/Swiss-Prot;Acc:Q9ER41]
14827		ENSMUSG00000027248	14827	Pdia3	Protein disulfide-isomerase A3 Precursor (EC 5.3.4.1)(Disulfide isomerase ER-60)(ERp60)(58 kDa microsomal protein)(p58)(ERp57) [Source:UniProtKB/Swiss-Prot;Acc:P27773]
208943		ENSMUSG00000033590	208943	Myo5c	myosin VC [Source:RefSeq peptide;Acc:NP_001074791]
17252		ENSMUSG00000066441	17252	Rdh11	Retinol dehydrogenase 11 (EC 1.1.1.-)(Retinal reductase 1)(RalR1)(Prostate short-chain dehydrogenase/reductase 1)(Androgen-regulated short-chain dehydrogenase/reductase 1)(Short-chain aldehyde dehydrogenase)(SCALD)(Cell line MC/9.IL4-derived protein 1)(M42C60) [Source:UniProtKB/Swiss-Prot;Acc:Q9QYF1]
13094		ENSMUSG00000040660	100047700 13094	Cyp2b9	Cytochrome P450 2B9 (EC 1.14.14.1)(CYPIIB9)(Testosterone 16-alpha hydroxylase)(P450-16-alpha)(Clone PF26) [Source:UniProtKB/Swiss-Prot;Acc:P12790]
53328		ENSMUSG00000006373	53328	Pgrmc1	Membrane-associated progesterone receptor component 1 [Source:UniProtKB/Swiss-Prot;Acc:O55022]
74754		ENSMUSG00000034926	74754	Dhcr24	24-dehydrocholesterol reductase Precursor (EC 1.3.1.-)(3-beta-hydroxysterol delta-24-reductase) [Source:UniProtKB/Swiss-Prot;Acc:Q8VCH6]
77975		ENSMUSG00000022964	77975	Tmem50b	Transmembrane protein 50B [Source:UniProtKB/Swiss-Prot;Acc:Q9D1X9]
66624		ENSMUSG00000035227	66624	Spcs2	Signal peptidase complex subunit 2 (EC 3.4.-.-)(Microsomal signal peptidase 25 kDa subunit)(SPase 25 kDa subunit) [Source:UniProtKB/Swiss-Prot;Acc:Q9CYN2]
100044230		ENSMUSG00000029233	100044230 57357	Srd5a3	3-oxo-5-alpha-steroid 4-dehydrogenase 3 (EC 1.3.99.5)(Steroid 5-alpha-reductase 3)(SR type 3)(Steroid 5-alpha-reductase 2-like) [Source:UniProtKB/Swiss-Prot;Acc:Q9WUP4]
67800		ENSMUSG00000030747	67800	Dgat2	Diacylglycerol O-acyltransferase 2 (EC 2.3.1.20)(Diglyceride acyltransferase 2) [Source:UniProtKB/Swiss-Prot;Acc:Q9DCV3]
15944		ENSMUSG00000046879	15944	Irgm1	Immunity-related GTPase family M protein (EC 3.6.5.-)(Immunity-related GTPase family M protein 1)(Interferon-inducible protein 1)(LPS-stimulated RAW 264.7 macrophage protein 47)(LRG-47) [Source:UniProtKB/Swiss-Prot;Acc:Q60766]
27362		ENSMUSG00000014905	625253 27362	Dnajb9	DnaJ homolog subfamily B member 9 (mDJ7) [Source:UniProtKB/Swiss-Prot;Acc:Q9QYI6]
11830		ENSMUSG00000044217	11830	Aqp5	Aquaporin-5 (AQP-5) [Source:UniProtKB/Swiss-Prot;Acc:Q9WTY4]
16438		ENSMUSG00000030102	16438	Itpr1	Inositol 1,4,5-trisphosphate receptor type 1 (Type 1 inositol 1,4,5-trisphosphate receptor)(Type 1 InsP3 receptor)(IP3 receptor isoform 1)(InsP3R1)(Inositol 1,4,5-trisphosphate-binding protein P400)(Purkinje cell protein 1)(Protein PCD-6) [Source:UniProtKB/Swiss-Prot;Acc:P11881]
19089		ENSMUSG00000003402	19089	Prkcsh	Glucosidase 2 subunit beta Precursor (Glucosidase II subunit beta)(Protein kinase C substrate 60.1 kDa protein heavy chain)(PKCSH)(80K-H protein) [Source:UniProtKB/Swiss-Prot;Acc:O08795]
14378		ENSMUSG00000005232	14378	G6pc2	Glucose-6-phosphatase 2 (G-6-Pase 2)(G6Pase 2)(EC 3.1.3.9)(Islet-specific glucose-6-phosphatase catalytic subunit-related protein) [Source:UniProtKB/Swiss-Prot;Acc:Q9Z186]
54325		ENSMUSG00000006390	54325	Elovl1	Elongation of very long chain fatty acids protein 1 [Source:UniProtKB/Swiss-Prot;Acc:Q9JLJ5]
76905		ENSMUSG00000037095	76905	Lrg1	leucine-rich alpha-2-glycoprotein [Source:RefSeq peptide;Acc:NP_084072]
cellular component----membrane----GO:0016020
C=4057;O=1007;E=909.29;R=1.11;rawP=4.57e-07;adjP=4.80e-05
12549		ENSMUSG00000022799	12549	Cdgap	Cdc42 GTPase-activating protein [Source:UniProtKB/Swiss-Prot;Acc:A6X8Z5]
21346		ENSMUSG00000026547	21346	Tagln2	Transgelin-2 (SM22-beta) [Source:UniProtKB/Swiss-Prot;Acc:Q9WVA4]
18198		ENSMUSG00000057280	18198	Musk	Muscle, skeletal receptor tyrosine protein kinase Precursor (EC 2.7.10.1)(Muscle-specific kinase receptor)(MuSK) [Source:UniProtKB/Swiss-Prot;Acc:Q61006]
67216		ENSMUSG00000020646	67216	Mboat2	Lysophospholipid acyltransferase 2 (LPLAT 2)(EC 2.3.1.-)(1-acylglycerophosphocholine O-acyltransferase)(EC 2.3.1.23)(Lysophosphatidylcholine acyltransferase)(Lyso-PC acyltransferase)(LPCAT)(Lysophosphatidylcholine acyltransferase 4)(Lyso-PC acyltransferase 4)(mLPCAT4)(1-acylglycerophosphoethanolamine O-acyltransferase)(EC 2.3.1.n2)(Lysophosphatidylethanolamine acyltransferase)(Lyso-PE acyltransfe…
94229		ENSMUSG00000026904	94229	Slc4a10	Sodium-driven chloride bicarbonate exchanger (Solute carrier family 4 member 10) [Source:UniProtKB/Swiss-Prot;Acc:Q5DTL9]
11423		ENSMUSG00000023328	11423	Ache	Acetylcholinesterase Precursor (AChE)(EC 3.1.1.7) [Source:UniProtKB/Swiss-Prot;Acc:P21836]
22038		ENSMUSG00000032369	22038	Plscr1	Phospholipid scramblase 1 (PL scramblase 1)(Ca(2+)-dependent phospholipid scramblase 1)(Transplantability-associated protein 1)(TRA1)(NOR1) [Source:UniProtKB/Swiss-Prot;Acc:Q9JJ00]
15002		ENSMUSG00000041538	15002	H2-Ob	histocompatibility 2, O region beta locus [Source:RefSeq peptide;Acc:NP_034519]
50498		ENSMUSG00000003206	50498	Ebi3	Interleukin-27 subunit beta Precursor (IL-27 subunit beta)(IL-27B)(Epstein-Barr virus-induced gene 3 protein homolog) [Source:UniProtKB/Swiss-Prot;Acc:O35228]
258882		ENSMUSG00000063350	258882	Olfr874	olfactory receptor 874 [Source:RefSeq peptide;Acc:NP_667093]
20449		ENSMUSG00000030283	20449	St8sia1	Alpha-N-acetylneuraminide alpha-2,8-sialyltransferase (EC 2.4.99.8)(Ganglioside GD3 synthase)(Ganglioside GT3 synthase)(Alpha-2,8-sialyltransferase 8A)(ST8Sia I) [Source:UniProtKB/Swiss-Prot;Acc:Q64687]
100041727		ENSMUSG00000078974	100046229 100045433 100043039 100043027 100041727 100047287 20335 100042561	Sec61g	Protein transport protein Sec61 subunit gamma [Source:UniProtKB/Swiss-Prot;Acc:P60060]
22253		ENSMUSG00000059921	22253	Unc5c	Netrin receptor UNC5C Precursor (Protein unc-5 homolog C)(Unc-5 homolog 3)(Rostral cerebellar malformation protein) [Source:UniProtKB/Swiss-Prot;Acc:O08747]
64929		ENSMUSG00000022123	64929	Scel	Sciellin [Source:UniProtKB/Swiss-Prot;Acc:Q9EQG3]
192287		ENSMUSG00000032449	192287	Slc25a36	Solute carrier family 25 member 36 [Source:UniProtKB/Swiss-Prot;Acc:Q922G0]
100045621		ENSMUSG00000047545	100045621 258818	Olfr629	olfactory receptor 629 [Source:RefSeq peptide;Acc:NP_667032]
74257		ENSMUSG00000025875	74257	Tspan17	Tetraspanin-17 (Tspan-17)(Transmembrane 4 superfamily member 17)(Tetraspan protein SB134)(F-box only protein 23) [Source:UniProtKB/Swiss-Prot;Acc:Q9D7W4]
20192		ENSMUSG00000057378	20192	Ryr3	ryanodine receptor 3 [Source:RefSeq peptide;Acc:NP_808320]
381832		ENSMUSG00000052262	381832	Prpmp5	proline-rich protein MP5 [Source:RefSeq peptide;Acc:NP_001019876]
16640		ENSMUSG00000033024	93968 16640 16639 100048754	Klra8	Killer cell lectin-like receptor 8 (T-cell surface glycoprotein Ly-49H)(Lymphocyte antigen 49h)(Ly-49h) [Source:UniProtKB/Swiss-Prot;Acc:Q60682]
330260		ENSMUSG00000032667	330260	Pon2	Serum paraoxonase/arylesterase 2 (PON 2)(EC 3.1.1.2)(EC 3.1.8.1)(Serum aryldialkylphosphatase 2)(A-esterase 2)(Aromatic esterase 2) [Source:UniProtKB/Swiss-Prot;Acc:Q62086]
258051		ENSMUSG00000046228	258051	Olfr93	olfactory receptor 93 [Source:RefSeq peptide;Acc:NP_001011813]
67729		ENSMUSG00000032718	67729	Mansc1	MANSC domain-containing protein 1 Precursor [Source:UniProtKB/Swiss-Prot;Acc:Q9CR33]
223920		ENSMUSG00000023045	223920	Soat2	Sterol O-acyltransferase 2 (EC 2.3.1.26)(Cholesterol acyltransferase 2)(Acyl coenzyme A:cholesterol acyltransferase 2)(ACAT-2) [Source:UniProtKB/Swiss-Prot;Acc:O88908]
12311		ENSMUSG00000023964	12311	Calcr	Calcitonin receptor Precursor (CT-R) [Source:UniProtKB/Swiss-Prot;Acc:Q60755]
11945		ENSMUSG00000031449	11945	Atp4b	Potassium-transporting ATPase subunit beta (Proton pump beta chain)(Gastric H(+)/K(+) ATPase subunit beta) [Source:UniProtKB/Swiss-Prot;Acc:P50992]
24099		ENSMUSG00000031497	24099	Tnfsf13b	Tumor necrosis factor ligand superfamily member 13B (B cell-activating factor)(BAFF)(CD257 antigen) [Contains Tumor necrosis factor ligand superfamily member 13b, membrane form;Tumor necrosis factor ligand superfamily member 13b, soluble form] [Source:UniProtKB/Swiss-Prot;Acc:Q9WU72]
14738		ENSMUSG00000041468	14738	Gpr12	Probable G-protein coupled receptor 12 (GPCR01) [Source:UniProtKB/Swiss-Prot;Acc:P35412]
73656		ENSMUSG00000079419	73656	Ms4a6c	Membrane-spanning 4-domains subfamily A member 6C [Source:UniProtKB/Swiss-Prot;Acc:Q99N08]
14261		ENSMUSG00000040181	14261	Fmo1	Dimethylaniline monooxygenase [N-oxide-forming] 1 (EC 1.14.13.8)(Hepatic flavin-containing monooxygenase 1)(FMO 1)(Dimethylaniline oxidase 1) [Source:UniProtKB/Swiss-Prot;Acc:P50285]
83408		ENSMUSG00000039264	83408	Gimap3	GTPase IMAP family member 3 (Immunity-associated nucleotide 4 protein) [Source:UniProtKB/Swiss-Prot;Acc:Q99MI6]
17387		ENSMUSG00000000957	17387	Mmp14	Matrix metalloproteinase-14 Precursor (MMP-14)(EC 3.4.24.80)(Membrane-type matrix metalloproteinase 1)(MT-MMP 1)(MTMMP1)(Membrane-type-1 matrix metalloproteinase)(MT1-MMP)(MT1MMP)(MMP-X1)(MT-MMP) [Source:UniProtKB/Swiss-Prot;Acc:P53690]
71718		ENSMUSG00000024170	71718	Telo2	Telomere length regulation protein TEL2 homolog [Source:UniProtKB/Swiss-Prot;Acc:Q9DC40]
74277		ENSMUSG00000029229	74277	Chic2	Cysteine-rich hydrophobic domain 2 protein [Source:UniProtKB/Swiss-Prot;Acc:Q9D9G3]
26385		ENSMUSG00000074886	26385	Grk6	G protein-coupled receptor kinase 6 (EC 2.7.11.16)(G protein-coupled receptor kinase GRK6) [Source:UniProtKB/Swiss-Prot;Acc:O70293]
11491		ENSMUSG00000052593	11491	Adam17	Disintegrin and metalloproteinase domain-containing protein 17 Precursor (ADAM 17)(EC 3.4.24.86)(TNF-alpha-converting enzyme)(TNF-alpha convertase)(CD156b antigen) [Source:UniProtKB/Swiss-Prot;Acc:Q9Z0F8]
192216		ENSMUSG00000025666	192216	Tmem47	Transmembrane protein 47 (Transmembrane 4 superfamily member 10) [Source:UniProtKB/Swiss-Prot;Acc:Q9JJG6]
113849		ENSMUSG00000060816	113849	V1ra7	Vomeronasal type-1 receptor A7 (Vomeronasal receptor 3)(Pheromone receptor VN3) [Source:UniProtKB/Swiss-Prot;Acc:Q9EP79]
12562		ENSMUSG00000031871	12562	Cdh5	Cadherin-5 Precursor (Vascular endothelial cadherin)(VE-cadherin)(CD144 antigen) [Source:UniProtKB/Swiss-Prot;Acc:P55284]
94275		ENSMUSG00000025151	94275	Maged1	Melanoma-associated antigen D1 (MAGE-D1 antigen)(Neurotrophin receptor-interacting MAGE homolog)(Dlxin-1) [Source:UniProtKB/Swiss-Prot;Acc:Q9QYH6]
20132		ENSMUSG00000028012	20132	Rrh	Visual pigment-like receptor peropsin [Source:UniProtKB/Swiss-Prot;Acc:O35214]
13733		ENSMUSG00000004730	13733	Emr1	EGF-like module-containing mucin-like hormone receptor-like 1 Precursor (Cell surface glycoprotein EMR1)(EMR1 hormone receptor)(Cell surface glycoprotein F4/80) [Source:UniProtKB/Swiss-Prot;Acc:Q61549]
67821		ENSMUSG00000016327	67821	Atp1b4	X/potassium-transporting ATPase subunit beta-m (X,K-ATPase subunit beta-m) [Source:UniProtKB/Swiss-Prot;Acc:Q99ME6]
57814		ENSMUSG00000047330	57814	Kcne4	Potassium voltage-gated channel subfamily E member 4 (Minimum potassium ion channel-related peptide 3)(Potassium channel subunit beta MiRP3)(MinK-related peptide 3) [Source:UniProtKB/Swiss-Prot;Acc:Q9WTW3]
23808		ENSMUSG00000031575	23808	Ash2l	Set1/Ash2 histone methyltransferase complex subunit ASH2 (ASH2-like protein) [Source:UniProtKB/Swiss-Prot;Acc:Q91X20]
50790		ENSMUSG00000031278	50790	Acsl4	Long-chain-fatty-acid--CoA ligase 4 (EC 6.2.1.3)(Long-chain acyl-CoA synthetase 4)(LACS 4)(mACS4) [Source:UniProtKB/Swiss-Prot;Acc:Q9QUJ7]
414077		ENSMUSG00000059355	619941 100045170 100040052 414077	BC056474	UPF0139 membrane protein C19orf56 homolog [Source:UniProtKB/Swiss-Prot;Acc:Q6ZWX0]
50799		ENSMUSG00000015112	50799	Slc25a13	Calcium-binding mitochondrial carrier protein Aralar2 (Mitochondrial aspartate glutamate carrier 2)(Solute carrier family 25 member 13)(Citrin) [Source:UniProtKB/Swiss-Prot;Acc:Q9QXX4]
12279		ENSMUSG00000022149	12279	C9	Complement component C9 Precursor [Source:UniProtKB/Swiss-Prot;Acc:P06683]
16633		ENSMUSG00000030187	16633	Klra2	Killer cell lectin-like receptor 2 (T-cell surface glycoprotein Ly-49B)(Lymphocyte antigen 49b)(Ly-49b) [Source:UniProtKB/Swiss-Prot;Acc:Q60660]
17060		ENSMUSG00000061132	17060	Blnk	B-cell linker protein (Cytoplasmic adapter protein)(B-cell adapter containing a SH2 domain protein)(B-cell adapter containing a Src homology 2 domain protein)(Src homology 2 domain-containing leukocyte protein of 65 kDa)(Slp-65)(Lymphocyte antigen 57) [Source:UniProtKB/Swiss-Prot;Acc:Q9QUN3]
20411		ENSMUSG00000025006	20411	Sorbs1	Sorbin and SH3 domain-containing protein 1 (Ponsin)(c-Cbl-associated protein)(CAP)(SH3 domain protein 5)(SH3P12) [Source:UniProtKB/Swiss-Prot;Acc:Q62417]
66601		ENSMUSG00000020839	66601	Tmigd1	Transmembrane and immunoglobulin domain-containing protein 1 Precursor [Source:UniProtKB/Swiss-Prot;Acc:Q9D7L8]
67272		ENSMUSG00000040759	67272	Cmtm5	CKLF-like MARVEL transmembrane domain-containing protein 5 (Chemokine-like factor superfamily member 5) [Source:UniProtKB/Swiss-Prot;Acc:Q9D6G9]
67510		ENSMUSG00000014177	67510 100045386	Fam18b	Protein FAM18B [Source:UniProtKB/Swiss-Prot;Acc:Q9D8T4]
13095		ENSMUSG00000003053	13095	Cyp2c29	Cytochrome P450 2C29 (EC 1.14.14.1)(CYPIIC29)(P-450 MUT-2)(Aldehyde oxygenase) [Source:UniProtKB/Swiss-Prot;Acc:Q64458]
16598		ENSMUSG00000055148	16598	Klf2	Krueppel-like factor 2 (Lung krueppel-like factor) [Source:UniProtKB/Swiss-Prot;Acc:Q60843]
212706		ENSMUSG00000001053	212706	C330016O10Rik	NEDD4-binding protein 3 (N4BP3) [Source:UniProtKB/Swiss-Prot;Acc:Q8C7U1]
22242		ENSMUSG00000030963	22242	Umod	Uromodulin Precursor (Tamm-Horsfall urinary glycoprotein)(THP) [Source:UniProtKB/Swiss-Prot;Acc:Q91X17]
16533		ENSMUSG00000020155	16533	Kcnmb1	Calcium-activated potassium channel subunit beta-1 (Calcium-activated potassium channel, subfamily M subunit beta-1)(Calcium-activated potassium channel subunit beta)(Maxi K channel subunit beta-1)(BK channel subunit beta-1)(BKbeta1)(BKbeta)(K(VCA)beta-1)(Slo-beta-1)(Slo-beta)(Charybdotoxin receptor subunit beta-1) [Source:UniProtKB/Swiss-Prot;Acc:Q8CAE3]
110835		ENSMUSG00000035594	110835	Chrna5	Neuronal acetylcholine receptor subunit alpha-5 Precursor [Source:UniProtKB/Swiss-Prot;Acc:Q2MKA5]
97387		ENSMUSG00000030374	97387	Strn4	Striatin-4 (Zinedin) [Source:UniProtKB/Swiss-Prot;Acc:P58404]
68659		ENSMUSG00000027955	68659	1110032E23Rik	Protein ENED (Expressed in nerve and epithelium during development) [Source:UniProtKB/Swiss-Prot;Acc:Q3UPI1]
67706		ENSMUSG00000079437	67706	Tmem179b	Transmembrane protein 179B [Source:UniProtKB/Swiss-Prot;Acc:Q9CY24]
102294		ENSMUSG00000079057	102294	Cyp4v3	Cytochrome P450 4V3 (EC 1.14.-.-) [Source:UniProtKB/Swiss-Prot;Acc:Q9DBW0]
67864		ENSMUSG00000024072	67864	Yipf4	Protein YIPF4 (YIP1 family member 4) [Source:UniProtKB/Swiss-Prot;Acc:Q8C407]
50490		ENSMUSG00000030562	50490	Nox4	NADPH oxidase 4 (EC 1.6.3.-)(Superoxide-generating NADPH oxidase 4)(Kidney superoxide-producing NADPH oxidase)(Kox-1)(Renal NAD(P)H-oxidase) [Source:UniProtKB/Swiss-Prot;Acc:Q9JHI8]
60532		ENSMUSG00000060475	100047730 60532 100043168	Wtap	Pre-mRNA-splicing regulator WTAP (Wilms tumor 1-associating protein)(WT1-associated protein)(Female-lethal(2)D homolog) [Source:UniProtKB/Swiss-Prot;Acc:Q9ER69]
56496		ENSMUSG00000067377	56496	Tspan6	Tetraspanin-6 (Tspan-6)(Transmembrane 4 superfamily member 6) [Source:UniProtKB/Swiss-Prot;Acc:O70401]
65106		ENSMUSG00000035199	65106	Arl6ip5	PRA1 family protein 3 (ADP-ribosylation factor-like protein 6-interacting protein 5)(ARL-6-interacting protein 5)(Aip-5)(Glutamate transporter EAAC1-interacting protein)(GTRAP3-18)(Prenylated Rab acceptor protein 2)(Protein JWa)(Addicsin) [Source:UniProtKB/Swiss-Prot;Acc:Q8R5J9]
56229		ENSMUSG00000031480	56229	Thsd1	Thrombospondin type-1 domain-containing protein 1 Precursor (Transmembrane molecule with thrombospondin module) [Source:UniProtKB/Swiss-Prot;Acc:Q9JM61]
24046		ENSMUSG00000034115	24046	Scn11a	Sodium channel protein type 11 subunit alpha (Sodium channel protein type XI subunit alpha)(Voltage-gated sodium channel subunit alpha Nav1.9)(Sensory neuron sodium channel 2)(NaN) [Source:UniProtKB/Swiss-Prot;Acc:Q9R053]
54608		ENSMUSG00000039202	54608	Abhd2	Abhydrolase domain-containing protein 2 (EC 3.1.1.-)(Lung alpha/beta hydrolase 2)(MmLABH2) [Source:UniProtKB/Swiss-Prot;Acc:Q9QXM0]
15530		ENSMUSG00000028763	15530	Hspg2	Basement membrane-specific heparan sulfate proteoglycan core protein Precursor (HSPG)(Perlecan)(PLC) [Source:UniProtKB/Swiss-Prot;Acc:Q05793]
66190		ENSMUSG00000030760	66190	Acer3	Alkaline ceramidase 3 (Alkaline CDase 3)(AlkCDase 3)(EC 3.5.1.-)(Alkaline phytoceramidase)(aPHC) [Source:UniProtKB/Swiss-Prot;Acc:Q9D099]
19159		ENSMUSG00000018001	19159	Cyth3	Cytohesin-3 (PH, SEC7 and coiled-coil domain-containing protein 3)(CLM3)(SEC7 homolog C)(mSec7-3)(ARF nucleotide-binding site opener 3)(Protein ARNO3)(General receptor of phosphoinositides 1)(Grp1) [Source:UniProtKB/Swiss-Prot;Acc:O08967]
18125		ENSMUSG00000029361	18125	Nos1	Nitric oxide synthase, brain (EC 1.14.13.39)(bNOS)(NOS type I)(Neuronal NOS)(N-NOS)(nNOS)(Constitutive NOS)(NC-NOS) [Source:UniProtKB/Swiss-Prot;Acc:Q9Z0J4]
17973		ENSMUSG00000032475	17973	Nck1	non-catalytic region of tyrosine kinase adaptor protein 1 [Source:RefSeq peptide;Acc:NP_035008]
70771		ENSMUSG00000056679	70771	Gpr173	Probable G-protein coupled receptor 173 (Super conserved receptor expressed in brain 3) [Source:UniProtKB/Swiss-Prot;Acc:Q6PI62]
14063		ENSMUSG00000021678	14063	F2rl1	Proteinase-activated receptor 2 Precursor (PAR-2)(Thrombin receptor-like 1)(Coagulation factor II receptor-like 1)(G-protein coupled receptor 11) [Source:UniProtKB/Swiss-Prot;Acc:P55086]
18858		ENSMUSG00000018217	18858	Pmp22	Peripheral myelin protein 22 (PMP-22)(Growth arrest-specific protein 3)(GAS-3) [Source:UniProtKB/Swiss-Prot;Acc:P16646]
66629		ENSMUSG00000022200	66629	Golph3	Golgi phosphoprotein 3 (Coat protein GPP34) [Source:UniProtKB/Swiss-Prot;Acc:Q9CRA5]
67180		ENSMUSG00000024487	67180	Yipf5	Protein YIPF5 (YIP1 family member 5)(YPT-interacting protein 1 A) [Source:UniProtKB/Swiss-Prot;Acc:Q9EQQ2]
11754		ENSMUSG00000019326	11754	Aoc3	Membrane primary amine oxidase (EC 1.4.3.21)(Copper amine oxidase)(Semicarbazide-sensitive amine oxidase)(SSAO)(Vascular adhesion protein 1)(VAP-1) [Source:UniProtKB/Swiss-Prot;Acc:O70423]
13482		ENSMUSG00000035000	13482	Dpp4	Dipeptidyl peptidase 4 (EC 3.4.14.5)(Dipeptidyl peptidase IV)(DPP IV)(T-cell activation antigen CD26)(Thymocyte-activating molecule)(THAM)(CD26 antigen) [Contains Dipeptidyl peptidase 4 membrane form(Dipeptidyl peptidase IV membrane form);Dipeptidyl peptidase 4 soluble form(Dipeptidyl peptidase IV soluble form)] [Source:UniProtKB/Swiss-Prot;Acc:P28843]
69524		ENSMUSG00000001946	69524	Esam	Endothelial cell-selective adhesion molecule Precursor [Source:UniProtKB/Swiss-Prot;Acc:Q925F2]
83493		ENSMUSG00000025240	83493	Sacm1l	Phosphatidylinositide phosphatase SAC1 (EC 3.1.3.-)(Suppressor of actin mutations 1-like protein) [Source:UniProtKB/Swiss-Prot;Acc:Q9EP69]
72082		ENSMUSG00000025002	72082	Cyp2c55	Cytochrome P450 2C55 (EC 1.14.14.1)(CYPIIC55) [Source:UniProtKB/Swiss-Prot;Acc:Q9D816]
14027		ENSMUSG00000034282	14027	Evpl	Envoplakin (210 kDa cornified envelope precursor protein)(p210) [Source:UniProtKB/Swiss-Prot;Acc:Q9D952]
70349		ENSMUSG00000030754	70349	Copb1	Coatomer subunit beta (Beta-coat protein)(Beta-COP) [Source:UniProtKB/Swiss-Prot;Acc:Q9JIF7]
229725		ENSMUSG00000027884	229725	Clcc1	Chloride channel CLIC-like protein 1 Precursor [Source:UniProtKB/Swiss-Prot;Acc:Q99LI2]
13726		ENSMUSG00000001964	13726	Emd	Emerin [Source:UniProtKB/Swiss-Prot;Acc:O08579]
18033		ENSMUSG00000028163	18033	Nfkb1	Nuclear factor NF-kappa-B p105 subunit (DNA-binding factor KBF1)(EBP-1)(NF-kappa-B1 p84/NF-kappa-B1 p98) [Contains Nuclear factor NF-kappa-B p50 subunit] [Source:UniProtKB/Swiss-Prot;Acc:P25799]
12125		ENSMUSG00000027381	12125	Bcl2l11	Bcl-2-like protein 11 (Bcl2-L-11)(Bcl2-interacting mediator of cell death) [Source:UniProtKB/Swiss-Prot;Acc:O54918]
100043181		ENSMUSG00000050836	100046244 100043181	AC142115.3	Putative uncharacterized protein Fragment [Source:UniProtKB/TrEMBL;Acc:Q8BPN6]
74338		ENSMUSG00000021565	74338	Slc6a19	Sodium-dependent neutral amino acid transporter B(0) (System B(0) neutral amino acid transporter)(B(0)AT1)(Solute carrier family 6 member 19) [Source:UniProtKB/Swiss-Prot;Acc:Q9D687]
67211		ENSMUSG00000038525	67211	Armc10	Armadillo repeat-containing protein 10 [Source:UniProtKB/Swiss-Prot;Acc:Q9D0L7]
110880		ENSMUSG00000001027	110880	Scn4a	Sodium channel protein type 4 subunit alpha (Sodium channel protein type IV subunit alpha)(Voltage-gated sodium channel subunit alpha Nav1.4)(Sodium channel protein skeletal muscle subunit alpha) [Source:UniProtKB/Swiss-Prot;Acc:Q9ER60]
66154		ENSMUSG00000021361	66154	Tmem14c	Transmembrane protein 14C [Source:UniProtKB/Swiss-Prot;Acc:Q9CQN6]
16399		ENSMUSG00000034664	16399	Itga2b	Integrin alpha-IIb Precursor (Platelet membrane glycoprotein IIb)(GPalpha IIb)(GPIIb)(CD41 antigen) [Contains Integrin alpha-IIb heavy chain;Integrin alpha-IIb light chain] [Source:UniProtKB/Swiss-Prot;Acc:Q9QUM0]
12560		ENSMUSG00000061048	12560	Cdh3	Cadherin-3 Precursor (Placental cadherin)(P-cadherin) [Source:UniProtKB/Swiss-Prot;Acc:P10287]
18145		ENSMUSG00000024413	18145	Npc1	Niemann-Pick C1 protein Precursor [Source:UniProtKB/Swiss-Prot;Acc:O35604]
74610		ENSMUSG00000028973	74610	Abcb8	ATP-binding cassette sub-family B member 8, mitochondrial Precursor [Source:UniProtKB/Swiss-Prot;Acc:Q9CXJ4]
17112		ENSMUSG00000027800	17112	Tm4sf1	Transmembrane 4 L6 family member 1 (Tumor-associated antigen L6)(Membrane component surface marker 1)(M3S1) [Source:UniProtKB/Swiss-Prot;Acc:Q64302]
15937		ENSMUSG00000003541	15937	Ier3	Radiation-inducible immediate-early gene IEX-1 (Immediate early protein GLY96)(Immediate early response 3 protein) [Source:UniProtKB/Swiss-Prot;Acc:P46694]
66091		ENSMUSG00000035674	66091	Ndufa3	NADH dehydrogenase [ubiquinone] 1 alpha subcomplex subunit 3 (NADH-ubiquinone oxidoreductase B9 subunit)(Complex I-B9)(CI-B9) [Source:UniProtKB/Swiss-Prot;Acc:Q9CQ91]
17533		ENSMUSG00000026712	17533	Mrc1	Macrophage mannose receptor 1 Precursor (MMR)(CD206 antigen) [Source:UniProtKB/Swiss-Prot;Acc:Q61830]
98432		ENSMUSG00000044340	98432	Phlpp	PH domain leucine-rich repeat-containing protein phosphatase (PH domain leucine-rich repeat protein phosphatase)(EC 3.1.3.16)(Pleckstrin homology domain-containing family E protein 1)(Suprachiasmatic nucleus circadian oscillatory protein)(Phlpp1) [Source:UniProtKB/Swiss-Prot;Acc:Q8CHE4]
28193		ENSMUSG00000019873	28193	Reep3	Receptor expression-enhancing protein 3 [Source:UniProtKB/Swiss-Prot;Acc:Q99KK1]
54635		ENSMUSG00000028019	54635	Pdgfc	Platelet-derived growth factor C Precursor (PDGF-C)(Spinal cord-derived growth factor)(SCDGF)(Fallotein)(VEGF-E) [Contains Platelet-derived growth factor C, latent form(PDGFC latent form);Platelet-derived growth factor C, receptor-binding form(PDGFC receptor-binding form)] [Source:UniProtKB/Swiss-Prot;Acc:Q8CI19]
12015		ENSMUSG00000024959	12015	Bad	Bcl2 antagonist of cell death (BAD)(Bcl-2-binding component 6)(Bcl-xL/Bcl-2-associated death promoter) [Source:UniProtKB/Swiss-Prot;Acc:Q61337]
13476		ENSMUSG00000005873	13476	Reep5	Receptor expression-enhancing protein 5 (Polyposis locus protein 1 homolog)(TB2 protein homolog)(GP106) [Source:UniProtKB/Swiss-Prot;Acc:Q60870]
57250		ENSMUSG00000073926	57250	Olfr653	olfactory receptor 653 [Source:RefSeq peptide;Acc:NP_667285]
16432		ENSMUSG00000022108	16432	Itm2b	Integral membrane protein 2B (E25B protein) [Source:UniProtKB/Swiss-Prot;Acc:O89051]
94043		ENSMUSG00000028563	94043	Tm2d1	TM2 domain-containing protein 1 Precursor (Beta-amyloid-binding protein)(mBBP) [Source:UniProtKB/Swiss-Prot;Acc:Q99MB3]
53320		ENSMUSG00000001773	53320	Folh1	Glutamate carboxypeptidase 2 (EC 3.4.17.21)(Glutamate carboxypeptidase II)(Membrane glutamate carboxypeptidase)(mGCP)(N-acetylated-alpha-linked acidic dipeptidase I)(NAALADase I)(Pteroylpoly-gamma-glutamate carboxypeptidase)(Folylpoly-gamma-glutamate carboxypeptidase)(FGCP)(Folate hydrolase 1)(Prostate-specific membrane antigen homolog) [Source:UniProtKB/Swiss-Prot;Acc:O35409]
80517		ENSMUSG00000008429	80517	Herpud2	Homocysteine-responsive endoplasmic reticulum-resident ubiquitin-like domain member 2 protein [Source:UniProtKB/Swiss-Prot;Acc:Q9JJC9]
19277		ENSMUSG00000030223	19277	Ptpn15	protein tyrosine phosphatase, receptor type, O [Source:RefSeq peptide;Acc:NP_035346]
16202		ENSMUSG00000030890	16202	Ilk	Integrin-linked protein kinase (EC 2.7.11.1) [Source:UniProtKB/Swiss-Prot;Acc:O55222]
67015		ENSMUSG00000030301	67015	Ccdc91	Coiled-coil domain-containing protein 91 (GGA-binding partner) [Source:UniProtKB/Swiss-Prot;Acc:Q9D8L5]
13136		ENSMUSG00000026399	13136	Cd55	Complement decay-accelerating factor, GPI-anchored Precursor (DAF-GPI)(CD55 antigen) [Source:UniProtKB/Swiss-Prot;Acc:Q61475]
14765		ENSMUSG00000056380	14765	Gpr50	Melatonin-related receptor (G protein-coupled receptor 50)(H9) [Source:UniProtKB/Swiss-Prot;Acc:O88495]
114584		ENSMUSG00000007041	114584	Clic1	Chloride intracellular channel protein 1 (Nuclear chloride ion channel 27)(NCC27) [Source:UniProtKB/Swiss-Prot;Acc:Q9Z1Q5]
58193		ENSMUSG00000027963	58193	Extl2	Exostosin-like 2 (EC 2.4.1.223)(Glucuronyl-galactosyl-proteoglycan 4-alpha-N-acetylglucosaminyltransferase)(Alpha-1,4-N-acetylhexosaminyltransferase EXTL2)(Alpha-GalNAcT EXTL2)(EXT-related protein 2) [Source:UniProtKB/Swiss-Prot;Acc:Q9ES89]
72434		ENSMUSG00000057454	72434	Lypd3	Ly6/PLAUR domain-containing protein 3 Precursor (GPI-anchored metastasis-associated protein C4.4A homolog) [Source:UniProtKB/Swiss-Prot;Acc:Q91YK8]
12496		ENSMUSG00000015085	12496	Entpd2	Ectonucleoside triphosphate diphosphohydrolase 2 (NTPDase 2)(Ecto-ATPase)(EC 3.6.1.-)(CD39 antigen-like 1) [Source:UniProtKB/Swiss-Prot;Acc:O55026]
70026		ENSMUSG00000023995	70026	Bzrpl1	Peripheral-type benzodiazepine receptor-like protein 1 [Source:UniProtKB/Swiss-Prot;Acc:Q9CRZ8]
70231		ENSMUSG00000014959	70231	Gorasp2	Golgi reassembly-stacking protein 2 (GRS2)(Golgi reassembly-stacking protein of 55 kDa)(GRASP55) [Source:UniProtKB/Swiss-Prot;Acc:Q99JX3]
14696		ENSMUSG00000027669	14696	Gnb4	Guanine nucleotide-binding protein subunit beta-4 (Transducin beta chain 4) [Source:UniProtKB/Swiss-Prot;Acc:P29387]
67753		ENSMUSG00000028575	67753	4930579C15Rik	Acrosome formation-associated factor Precursor [Source:UniProtKB/Swiss-Prot;Acc:Q9D9V2]
15018		ENSMUSG00000060550	15018	H2-Q9	H-2 class I histocompatibility antigen, Q7 alpha chain Precursor (QA-2 antigen) [Source:UniProtKB/Swiss-Prot;Acc:P14429]
58998		ENSMUSG00000022656	58998	Pvrl3	Poliovirus receptor-related protein 3 Precursor (Cell adhesion molecule nectin-3)(Nectin-3)(CD113 antigen) [Source:UniProtKB/Swiss-Prot;Acc:Q9JLB9]
12317		ENSMUSG00000003814	12317	Calr	Calreticulin Precursor (CRP55)(Calregulin)(HACBP)(ERp60) [Source:UniProtKB/Swiss-Prot;Acc:P14211]
79201		ENSMUSG00000037613	79201	Tnfrsf23	Tumor necrosis factor receptor superfamily member 23 Precursor (Tumor necrosis factor receptor p60 homolog 1)(TNF receptor family member SOB)(Decoy TRAIL receptor 1)(TNF receptor homolog 1) [Source:UniProtKB/Swiss-Prot;Acc:Q9ER63]
117591		ENSMUSG00000005107	117591	Slc2a9	solute carrier family 2, member 9 isoform 4 [Source:RefSeq peptide;Acc:NP_663534]
80837		ENSMUSG00000046768	80837	Rhoj	Rho-related GTP-binding protein RhoJ Precursor (Tc10-like GTP-binding protein TCL) [Source:UniProtKB/Swiss-Prot;Acc:Q9ER71]
21983		ENSMUSG00000035274	21983	Tpbg	Trophoblast glycoprotein Precursor (5T4 oncofetal trophoblast glycoprotein)(5T4 oncotrophoblast glycoprotein) [Source:UniProtKB/Swiss-Prot;Acc:Q9Z0L0]
75458		ENSMUSG00000054400	75458	Cklf	Chemokine-like factor [Source:UniProtKB/Swiss-Prot;Acc:Q9DAS1]
13017		ENSMUSG00000030970	13017	Ctbp2	C-terminal-binding protein 2 (CtBP2) [Source:UniProtKB/Swiss-Prot;Acc:P56546]
76279		ENSMUSG00000022445	76279	Cyp2d26	Cytochrome P450 2D26 (EC 1.14.14.1)(CYPIID26) [Source:UniProtKB/Swiss-Prot;Acc:Q8CIM7]
18365		ENSMUSG00000047163	18365	Olfr64	olfactory receptor 65 [Source:RefSeq peptide;Acc:NP_038644]
19124		ENSMUSG00000027611	19124	Procr	Endothelial protein C receptor Precursor (Endothelial cell protein C receptor)(Activated protein C receptor)(APC receptor)(Centrocyclin)(Centrosomal protein CCD41)(CD201 antigen) [Source:UniProtKB/Swiss-Prot;Acc:Q64695]
68632		ENSMUSG00000046916	68632	Myct1	Myc target protein 1 (Myc target in myeloid cells protein 1) [Source:UniProtKB/Swiss-Prot;Acc:Q8R411]
56177		ENSMUSG00000026833	56177	Olfm1	Noelin Precursor (Neuronal olfactomedin-related ER localized protein)(Olfactomedin-1)(Pancortin) [Source:UniProtKB/Swiss-Prot;Acc:O88998]
81879		ENSMUSG00000026380	81879	Tcfcp2l1	Transcription factor CP2-like protein 1 (CP2-related transcriptional repressor 1)(CRTR-1) [Source:UniProtKB/Swiss-Prot;Acc:Q3UNW5]
20514		ENSMUSG00000001918	20514	Slc1a5	Neutral amino acid transporter B(0) (ATB(0))(Sodium-dependent neutral amino acid transporter type 2)(Insulin-activated amino acid transporter)(ASC-like Na(+)-dependent neutral amino acid transporter ASCT2)(Solute carrier family 1 member 5) [Source:UniProtKB/Swiss-Prot;Acc:P51912]
84004		ENSMUSG00000032135	84004	Mcam	Cell surface glycoprotein MUC18 Precursor (Melanoma-associated antigen MUC18)(Melanoma cell adhesion molecule)(Gicerin)(CD146 antigen) [Source:UniProtKB/Swiss-Prot;Acc:Q8R2Y2]
83490		ENSMUSG00000025017	83490	Pik3ap1	Phosphoinositide 3-kinase adapter protein 1 (B-cell phosphoinositide 3-kinase adapter protein 1)(B-cell adapter for phosphoinositide 3-kinase) [Source:UniProtKB/Swiss-Prot;Acc:Q9EQ32]
94352		ENSMUSG00000034205	100047339 94352	Loxl2	Lysyl oxidase homolog 2 Precursor (EC 1.4.3.-)(Lysyl oxidase-like protein 2) [Source:UniProtKB/Swiss-Prot;Acc:P58022]
15248		ENSMUSG00000043099	15248	Hic1	Hypermethylated in cancer 1 protein (Hic-1) [Source:UniProtKB/Swiss-Prot;Acc:Q9R1Y5]
18700		ENSMUSG00000031381	18700	Piga	N-acetylglucosaminyl-phosphatidylinositol biosynthetic protein (GlcNAc-PI synthesis protein)(Phosphatidylinositol-glycan biosynthesis class A protein)(PIG-A) [Source:UniProtKB/Swiss-Prot;Acc:Q64323]
72124		ENSMUSG00000079614	72124	Seh1l	Nucleoporin SEH1-like [Source:UniProtKB/Swiss-Prot;Acc:Q8R2U0]
67017		ENSMUSG00000027495	67017	2010011I20Rik	Transmembrane protein C20orf108 homolog [Source:UniProtKB/Swiss-Prot;Acc:Q9D8B6]
15357		ENSMUSG00000021670	15357	Hmgcr	3-hydroxy-3-methylglutaryl-coenzyme A reductase (HMG-CoA reductase)(EC 1.1.1.34) [Source:UniProtKB/Swiss-Prot;Acc:Q01237]
226499		ENSMUSG00000006010	226499	BC003331	Protein odr-4 homolog (mODR-4) [Source:UniProtKB/Swiss-Prot;Acc:Q4PJX1]
18991		ENSMUSG00000078236	18991	Pou3f1	POU domain, class 3, transcription factor 1 (Octamer-binding transcription factor 6)(Oct-6)(POU domain transcription factor SCIP) [Source:UniProtKB/Swiss-Prot;Acc:P21952]
66695		ENSMUSG00000021388	66695	Aspn	Asporin Precursor [Source:UniProtKB/Swiss-Prot;Acc:Q99MQ4]
17082		ENSMUSG00000026069	17082	Il1rl1	Interleukin-1 receptor-like 1 Precursor (Protein ST2)(Protein T1)(Lymphocyte antigen 84) [Source:UniProtKB/Swiss-Prot;Acc:P14719]
69169		ENSMUSG00000042474	69169	Faim3	Fas apoptotic inhibitory molecule 3 Precursor (Regulator of Fas-induced apoptosis Toso) [Source:UniProtKB/Swiss-Prot;Acc:A1KXC4]
50918		ENSMUSG00000068566	50918	Myadm	Myeloid-associated differentiation marker (Myeloid up-regulated protein) [Source:UniProtKB/Swiss-Prot;Acc:O35682]
56508		ENSMUSG00000049044	56508	Rapgef4	Rap guanine nucleotide exchange factor 4 (cAMP-regulated guanine nucleotide exchange factor II)(cAMP-GEFII)(Exchange factor directly activated by cAMP 2)(Epac 2)(cAMP-dependent Rap1 guanine-nucleotide exchange factor) [Source:UniProtKB/Swiss-Prot;Acc:Q9EQZ6]
53322		ENSMUSG00000030659	53322	Nucb2	Nucleobindin-2 Precursor (DNA-binding protein NEFA) [Source:UniProtKB/Swiss-Prot;Acc:P81117]
12306		ENSMUSG00000032231	100048867 12306	Anxa2	Annexin A2 (Annexin-2)(Annexin II)(Lipocortin II)(Calpactin I heavy chain)(Chromobindin-8)(p36)(Protein I)(Placental anticoagulant protein IV)(PAP-IV) [Source:UniProtKB/Swiss-Prot;Acc:P07356]
17155		ENSMUSG00000003746	17155	Man1a	Mannosyl-oligosaccharide 1,2-alpha-mannosidase IA (EC 3.2.1.113)(Processing alpha-1,2-mannosidase IA)(Alpha-1,2-mannosidase IA)(Mannosidase alpha class 1A member 1)(Man(9)-alpha-mannosidase)(Man9-mannosidase) [Source:UniProtKB/Swiss-Prot;Acc:P45700]
16523		ENSMUSG00000030247	16523	Kcnj8	ATP-sensitive inward rectifier potassium channel 8 (Potassium channel, inwardly rectifying subfamily J member 8)(Inwardly rectifier K(+) channel Kir6.1)(uKATP-1) [Source:UniProtKB/Swiss-Prot;Acc:P97794]
14417		ENSMUSG00000026787	14417	Gad2	Glutamate decarboxylase 2 (EC 4.1.1.15)(Glutamate decarboxylase 65 kDa isoform)(65 kDa glutamic acid decarboxylase)(GAD-65) [Source:UniProtKB/Swiss-Prot;Acc:P48320]
12776		ENSMUSG00000042262	12776	Ccr8	C-C chemokine receptor type 8 (C-C CKR-8)(CC-CKR-8)(CCR-8)(CDw198 antigen) [Source:UniProtKB/Swiss-Prot;Acc:P56484]
74039		ENSMUSG00000058099	74039	Nfam1	NFAT activation molecule 1 Precursor (Calcineurin/NFAT-activating ITAM-containing protein)(NFAT-activating protein with ITAM motif 1) [Source:UniProtKB/Swiss-Prot;Acc:Q8R4V1]
12799		ENSMUSG00000006782	12799	Cnp	2',3'-cyclic-nucleotide 3'-phosphodiesterase (CNPase)(CNP)(EC 3.1.4.37) [Source:UniProtKB/Swiss-Prot;Acc:P16330]
20320		ENSMUSG00000032336	20320	Nptn	Neuroplastin Precursor (Stromal cell-derived receptor 1)(SDR-1) [Source:UniProtKB/Swiss-Prot;Acc:P97300]
15006		ENSMUSG00000079507	15006 15013	H2-Q2	histocompatibility 2, Q region locus 1 [Source:RefSeq peptide;Acc:NP_034520]
67556		ENSMUSG00000050229	67556	Pigm	GPI mannosyltransferase 1 (EC 2.4.1.-)(GPI mannosyltransferase I)(GPI-MT-I)(Phosphatidylinositol-glycan biosynthesis class M protein)(PIG-M) [Source:UniProtKB/Swiss-Prot;Acc:Q8C2R7]
56876		ENSMUSG00000006476	56876	Nelf	Nasal embryonic luteinizing hormone-releasing hormone factor (Nasal embryonic LHRH factor)(Juxtasynaptic attractor of caldendrin on dendritic boutons protein)(Jacob protein) [Source:UniProtKB/Swiss-Prot;Acc:Q99NF2]
212999		ENSMUSG00000031691	212999	Tnpo2	Transportin-2 (Karyopherin beta-2b) [Source:UniProtKB/Swiss-Prot;Acc:Q99LG2]
74653		ENSMUSG00000037251	74653	4930444A02Rik	Protein kinase-like protein SgK196 (Sugen kinase 196) [Source:UniProtKB/Swiss-Prot;Acc:Q3TUA9]
12111		ENSMUSG00000031375	12111	Bgn	Biglycan Precursor (Bone/cartilage proteoglycan I)(PG-S1) [Source:UniProtKB/Swiss-Prot;Acc:P28653]
58800		ENSMUSG00000027365	58800	Trpm7	Transient receptor potential cation channel subfamily M member 7 (EC 2.7.11.1)(Long transient receptor potential channel 7)(LTrpC7)(Channel-kinase 1)(Transient receptor potential-phospholipase C-interacting kinase)(TRP-PLIK) [Source:UniProtKB/Swiss-Prot;Acc:Q923J1]
12847		ENSMUSG00000026553	12847	Copa	Coatomer subunit alpha (Alpha-coat protein)(Alpha-COP) [Contains Xenin(Xenopsin-related peptide);Proxenin] [Source:UniProtKB/Swiss-Prot;Acc:Q8CIE6]
66234		ENSMUSG00000031604	66234	Sc4mol	C-4 methylsterol oxidase (EC 1.14.13.72)(Methylsterol monooxygenase) [Source:UniProtKB/Swiss-Prot;Acc:Q9CRA4]
20364		ENSMUSG00000041571	20364	Sepw1	Selenoprotein W (SelW) [Source:UniProtKB/Swiss-Prot;Acc:P63300]
20452		ENSMUSG00000040710	20452	St8sia4	CMP-N-acetylneuraminate-poly-alpha-2,8-sialyltransferase (EC 2.4.99.-)(Alpha-2,8-sialyltransferase 8D)(ST8Sia IV)(Polysialyltransferase-1) [Source:UniProtKB/Swiss-Prot;Acc:Q64692]
12389		ENSMUSG00000007655	12389	Cav1	Caveolin-1 [Source:UniProtKB/Swiss-Prot;Acc:P49817]
66864		ENSMUSG00000045930	66864	Clec14a	C-type lectin domain family 14 member A Precursor [Source:UniProtKB/Swiss-Prot;Acc:Q8VCP9]
81910		ENSMUSG00000027422	81910	Rrbp1	ribosome binding protein 1 isoform b [Source:RefSeq peptide;Acc:NP_598329]
19070		ENSMUSG00000025979	19070	Mobkl3	Mps one binder kinase activator-like 3 (Preimplantation protein 3)(Mob1 homolog 3)(Mob3)(Class II mMOB1) [Source:UniProtKB/Swiss-Prot;Acc:Q6PEB6]
70357		ENSMUSG00000053519	70357	Kcnip1	Kv channel-interacting protein 1 (KChIP1)(A-type potassium channel modulatory protein 1)(Potassium channel-interacting protein 1) [Source:UniProtKB/Swiss-Prot;Acc:Q9JJ57]
258323		ENSMUSG00000062149	258323	Olfr943	olfactory receptor 943 [Source:RefSeq peptide;Acc:NP_666438]
192198		ENSMUSG00000049939	192198	Lrrc4	Leucine-rich repeat-containing protein 4 Precursor (Brain tumor-associated protein MBAG1) [Source:UniProtKB/Swiss-Prot;Acc:Q99PH1]
14700		ENSMUSG00000038607	14700	Gng10	Guanine nucleotide-binding protein G(I)/G(S)/G(O) subunit gamma-10 Precursor [Source:UniProtKB/Swiss-Prot;Acc:Q9CXP8]
76795		ENSMUSG00000036644	76795	Tbc1d9b	TBC1 domain family member 9B [Source:UniProtKB/Swiss-Prot;Acc:Q5SVR0]
22772		ENSMUSG00000061524	22772	Zic2	Zinc finger protein ZIC 2 (Zinc finger protein of the cerebellum 2) [Source:UniProtKB/Swiss-Prot;Acc:Q62520]
83704		ENSMUSG00000037344	83704	Slc12a9	Solute carrier family 12 member 9 (Potassium-chloride transporter 9)(Cation-chloride cotransporter-interacting protein 1) [Source:UniProtKB/Swiss-Prot;Acc:Q99MR3]
68311		ENSMUSG00000022595	68311	Lypd2	Ly6/PLAUR domain-containing protein 2 Precursor (Protein H8C4) [Source:UniProtKB/Swiss-Prot;Acc:Q9DD23]
18566		ENSMUSG00000026285	18566	Pdcd1	Programmed cell death protein 1 Precursor (Protein PD-1)(mPD-1)(CD279 antigen) [Source:UniProtKB/Swiss-Prot;Acc:Q02242]
68385		ENSMUSG00000019437	68385	Tlcd1	TLC domain-containing protein 1 Precursor [Source:UniProtKB/Swiss-Prot;Acc:Q99JT6]
93790		ENSMUSG00000030452	93790	Nipa2	Non-imprinted in Prader-Willi/Angelman syndrome region protein 2 homolog [Source:UniProtKB/Swiss-Prot;Acc:Q9JJC8]
18414		ENSMUSG00000022146	18414	Osmr	Oncostatin-M specific receptor subunit beta Precursor [Source:UniProtKB/Swiss-Prot;Acc:O70458]
76408		ENSMUSG00000020865	76408	Abcc3	Canalicular multispecific organic anion transporter 2 (ATP-binding cassette sub-family C member 3)(Multidrug resistance-associated protein 3) [Source:UniProtKB/Swiss-Prot;Acc:B2RX12]
17127		ENSMUSG00000032402	17127	Smad3	Mothers against decapentaplegic homolog 3 (Mad3)(mMad3)(Mothers against DPP homolog 3)(SMAD 3) [Source:UniProtKB/Swiss-Prot;Acc:Q8BUN5]
64380		ENSMUSG00000024675	64380	Ms4a4c	membrane-spanning 4-domains, subfamily A, member 4C [Source:RefSeq peptide;Acc:NP_083775]
69543		ENSMUSG00000078144	69543	Capns2	Calpain small subunit 2 (CSS2)(Calcium-dependent protease small subunit 2) [Source:UniProtKB/Swiss-Prot;Acc:Q9D7J7]
52710		ENSMUSG00000022560	52710	Gpr172b	Porcine endogenous retrovirus A receptor 2 homolog Precursor (PERV-A receptor 2 homolog)(Protein GPR172B) [Source:UniProtKB/Swiss-Prot;Acc:Q9D8F3]
20370		ENSMUSG00000000632	20370	Sez6	Seizure protein 6 Precursor (SEZ-6)(Brain-specific receptor-like protein C)(BSRP-C) [Source:UniProtKB/Swiss-Prot;Acc:Q7TSK2]
12527		ENSMUSG00000030342	12527	Cd9	CD9 antigen (CD9 antigen) [Source:UniProtKB/Swiss-Prot;Acc:P40240]
21333		ENSMUSG00000061762	21333	Tac1	Protachykinin-1 Precursor (PPT) [Contains Substance P;Neurokinin A(NKA)(Substance K)(Neuromedin L);Neuropeptide K(NPK);Neuropeptide gamma;C-terminal-flanking peptide] [Source:UniProtKB/Swiss-Prot;Acc:P41539]
18949		ENSMUSG00000020994	18949	Pnn	Pinin [Source:UniProtKB/Swiss-Prot;Acc:O35691]
27028		ENSMUSG00000028644	27028	Ermap	Erythroid membrane-associated protein Precursor [Source:UniProtKB/Swiss-Prot;Acc:Q9JLN5]
13119		ENSMUSG00000028715	13119	Cyp4a14	Cytochrome P450 4A14 Precursor (CYPIVA14)(Lauric acid omega-hydroxylase 3)(EC 1.14.15.3)(P450-LA-omega 3) [Source:UniProtKB/Swiss-Prot;Acc:O35728]
207818		ENSMUSG00000053559	207818 627480	BC004728	Small transmembrane and glycosylated protein [Source:UniProtKB/Swiss-Prot;Acc:Q99KC7]
76768		ENSMUSG00000079440	76768	Alpi	intestinal alkaline phosphatase [Source:RefSeq peptide;Acc:NP_001074551]
57253		ENSMUSG00000037140	57253	Tas2r108	Taste receptor type 2 member 4 (T2R4)(Taste receptor type 2 member 8)(T2R8) [Source:UniProtKB/Swiss-Prot;Acc:Q9JKT3]
436493		ENSMUSG00000035929	436493	H2-gs10	MHC class I like protein GS10 [Source:RefSeq peptide;Acc:NP_001137161]
17294		ENSMUSG00000051855	17294	Mest	Mesoderm-specific transcript protein (Paternally-expressed gene 1 protein) [Source:UniProtKB/Swiss-Prot;Acc:Q07646]
66111		ENSMUSG00000032353	66111	Tmed3	Transmembrane emp24 domain-containing protein 3 Precursor [Source:UniProtKB/Swiss-Prot;Acc:Q78IS1]
53945		ENSMUSG00000025993	53945	Slc40a1	Solute carrier family 40 member 1 (Ferroportin-1)(Iron-regulated transporter 1)(Metal transporter protein 1)(MTP1) [Source:UniProtKB/Swiss-Prot;Acc:Q9JHI9]
65079		ENSMUSG00000043811	65079	Rtn4r	Reticulon-4 receptor Precursor (Nogo receptor)(NgR)(Nogo-66 receptor) [Source:UniProtKB/Swiss-Prot;Acc:Q99PI8]
93671		ENSMUSG00000008845	93671	Cd163	Scavenger receptor cysteine-rich type 1 protein M130 Precursor (CD163 antigen) [Contains Soluble CD163(sCD163)] [Source:UniProtKB/Swiss-Prot;Acc:Q2VLH6]
77296		ENSMUSG00000019909	77296	Fam162b	UPF0389 protein FAM162B [Source:UniProtKB/Swiss-Prot;Acc:Q9CX19]
77975		ENSMUSG00000022964	77975	Tmem50b	Transmembrane protein 50B [Source:UniProtKB/Swiss-Prot;Acc:Q9D1X9]
11303		ENSMUSG00000015243	11303	Abca1	ATP-binding cassette sub-family A member 1 (ATP-binding cassette transporter 1)(ATP-binding cassette 1)(ABC-1) [Source:UniProtKB/Swiss-Prot;Acc:P41233]
17883		ENSMUSG00000020908	17883	Myh3	Myosin-3 (Myosin heavy chain 3) [Source:UniProtKB/Swiss-Prot;Acc:P13541]
19153		ENSMUSG00000053198	19153	Prx	Periaxin [Source:UniProtKB/Swiss-Prot;Acc:O55103]
21753		ENSMUSG00000029552	21753	Tes	Testin (TES1/TES2) [Source:UniProtKB/Swiss-Prot;Acc:P47226]
71927		ENSMUSG00000031703	71927	Itfg1	T-cell immunomodulatory protein Precursor (Protein TIP)(Integrin-alpha FG-GAP repeat-containing protein 1) [Source:UniProtKB/Swiss-Prot;Acc:Q99KW9]
15944		ENSMUSG00000046879	15944	Irgm1	Immunity-related GTPase family M protein (EC 3.6.5.-)(Immunity-related GTPase family M protein 1)(Interferon-inducible protein 1)(LPS-stimulated RAW 264.7 macrophage protein 47)(LRG-47) [Source:UniProtKB/Swiss-Prot;Acc:Q60766]
15247		ENSMUSG00000027958	15247	Hiat1	Hippocampus abundant transcript 1 protein [Source:UniProtKB/Swiss-Prot;Acc:P70187]
14683		ENSMUSG00000027523	14683	Gnas	Protein ALEX (Alternative gene product encoded by XL-exon) [Source:UniProtKB/Swiss-Prot;Acc:Q6R0H6]
11852		ENSMUSG00000054364	11852	Rhob	Rho-related GTP-binding protein RhoB Precursor [Source:UniProtKB/Swiss-Prot;Acc:P62746]
211914		ENSMUSG00000052632	211914	Asap2	Arf-GAP with SH3 domain, ANK repeat and PH domain-containing protein 2 (Development and differentiation-enhancing factor 2)(Pyk2 C-terminus-associated protein)(PAP)(Paxillin-associated protein with ARFGAP activity 3)(PAG3) [Source:UniProtKB/Swiss-Prot;Acc:Q7SIG6]
116733		ENSMUSG00000031913	116733	Vps4a	Vacuolar protein sorting-associated protein 4A [Source:UniProtKB/Swiss-Prot;Acc:Q8VEJ9]
12833		ENSMUSG00000001119	12833	Col6a1	Collagen alpha-1(VI) chain Precursor [Source:UniProtKB/Swiss-Prot;Acc:Q04857]
16438		ENSMUSG00000030102	16438	Itpr1	Inositol 1,4,5-trisphosphate receptor type 1 (Type 1 inositol 1,4,5-trisphosphate receptor)(Type 1 InsP3 receptor)(IP3 receptor isoform 1)(InsP3R1)(Inositol 1,4,5-trisphosphate-binding protein P400)(Purkinje cell protein 1)(Protein PCD-6) [Source:UniProtKB/Swiss-Prot;Acc:P11881]
11830		ENSMUSG00000044217	11830	Aqp5	Aquaporin-5 (AQP-5) [Source:UniProtKB/Swiss-Prot;Acc:Q9WTY4]
68642		ENSMUSG00000024667	68642	Tmem216	Transmembrane protein 216 (Thymus atrophy-related protein) [Source:UniProtKB/Swiss-Prot;Acc:Q9CQC4]
27280		ENSMUSG00000041801	27280	Phlda3	Pleckstrin homology-like domain family A member 3 (TDAG51/Ipl homolog 1) [Source:UniProtKB/Swiss-Prot;Acc:Q9WV95]
70350		ENSMUSG00000045763	70350	Basp1	Brain acid soluble protein 1 (BASP1 protein)(Neuronal axonal membrane protein NAP-22)(22 kDa neuronal tissue-enriched acidic protein) [Source:UniProtKB/Swiss-Prot;Acc:Q91XV3]
56774		ENSMUSG00000031089	56774	Slc6a14	Sodium- and chloride-dependent neutral and basic amino acid transporter B(0+) (Amino acid transporter ATB0+)(Colonic system B0+ amino acid transporter CATB0+)(Solute carrier family 6 member 14) [Source:UniProtKB/Swiss-Prot;Acc:Q9JMA9]
217069		ENSMUSG00000000275	217069	Trim25	Tripartite motif-containing protein 25 (Zinc finger protein 147)(Estrogen-responsive finger protein)(Efp) [Source:UniProtKB/Swiss-Prot;Acc:Q61510]
100226		ENSMUSG00000028879	100226	Stx12	Syntaxin-12 [Source:UniProtKB/Swiss-Prot;Acc:Q9ER00]
66146		ENSMUSG00000028826	66146	Tmem57	Macoilin (Transmembrane protein 57)(Brain-specific adaptor protein C61) [Source:UniProtKB/Swiss-Prot;Acc:Q7TQE6]
18538		ENSMUSG00000027342	100046823 18538	Pcna	Proliferating cell nuclear antigen (PCNA)(Cyclin) [Source:UniProtKB/Swiss-Prot;Acc:P17918]
74482		ENSMUSG00000065968	74482	Ifitm7	interferon induced transmembrane protein 7 [Source:RefSeq peptide;Acc:NP_083244]
77772		ENSMUSG00000042672	77772	Dcst1	DC-STAMP domain-containing protein 1 [Source:UniProtKB/Swiss-Prot;Acc:Q059Y8]
68553		ENSMUSG00000032572	68553	1110001D15Rik	Collagen alpha-4(VI) chain Precursor [Source:UniProtKB/Swiss-Prot;Acc:A2AX52]
26568		ENSMUSG00000027932	26568	Slc27a3	Long-chain fatty acid transport protein 3 (Fatty acid transport protein 3)(FATP-3)(EC 6.2.1.-)(Solute carrier family 27 member 3) [Source:UniProtKB/Swiss-Prot;Acc:O88561]
16591		ENSMUSG00000058488	16591	Kl	Klotho Precursor (EC 3.2.1.31) [Contains Klotho peptide] [Source:UniProtKB/Swiss-Prot;Acc:O35082]
56325		ENSMUSG00000029408	56325	Abcb9	ATP-binding cassette sub-family B member 9 Precursor (ATP-binding cassette transporter 9)(ABC transporter 9 protein)(mABCB9)(TAP-like protein)(TAPL) [Source:UniProtKB/Swiss-Prot;Acc:Q9JJ59]
26362		ENSMUSG00000002602	26362	Axl	Tyrosine-protein kinase receptor UFO Precursor (EC 2.7.10.1)(Adhesion-related kinase) [Source:UniProtKB/Swiss-Prot;Acc:Q00993]
11796		ENSMUSG00000032000	11796	Birc3	Baculoviral IAP repeat-containing protein 3 (Inhibitor of apoptosis protein 1)(MIAP-1)(MIAP1) [Source:UniProtKB/Swiss-Prot;Acc:O08863]
14066		ENSMUSG00000028128	14066	F3	Tissue factor Precursor (TF)(Coagulation factor III)(CD142 antigen) [Source:UniProtKB/Swiss-Prot;Acc:P20352]
71514		ENSMUSG00000028820	71514 100045887	Sfpq	Splicing factor, proline- and glutamine-rich (Polypyrimidine tract-binding protein-associated-splicing factor)(PTB-associated-splicing factor)(PSF)(DNA-binding p52/p100 complex, 100 kDa subunit) [Source:UniProtKB/Swiss-Prot;Acc:Q8VIJ6]
109225		ENSMUSG00000024672	109225	Ms4a7	membrane-spanning 4-domains, subfamily A, member 7 isoform a [Source:RefSeq peptide;Acc:NP_082112]
21812		ENSMUSG00000007613	21812	Tgfbr1	TGF-beta receptor type-1 Precursor (EC 2.7.11.30)(Transforming growth factor-beta receptor type I)(TGF-beta receptor type I)(TGF-beta type I receptor)(TbetaR-I)(TGFR-1)(ESK2) [Source:UniProtKB/Swiss-Prot;Acc:Q64729]
17250		ENSMUSG00000023088	17250	Abcc1	Multidrug resistance-associated protein 1 (ATP-binding cassette sub-family C member 1)(Leukotriene C(4) transporter)(LTC4 transporter) [Source:UniProtKB/Swiss-Prot;Acc:O35379]
13196		ENSMUSG00000022377	100045359 13196	Asap1	Arf-GAP with SH3 domain, ANK repeat and PH domain-containing protein 1 (130 kDa phosphatidylinositol 4,5-biphosphate-dependent ARF1 GTPase-activating protein)(PIP2-dependent ARF1 GAP)(ADP-ribosylation factor-directed GTPase-activating protein 1)(ARF GTPase-activating protein 1)(Development and differentiation-enhancing factor 1)(Differentiation-enhancing factor 1)(DEF-1) [Source:UniProtKB/Swiss-P…
18131		ENSMUSG00000038146	18131	Notch3	Neurogenic locus notch homolog protein 3 Precursor (Notch 3) [Contains Notch 3 extracellular truncation;Notch 3 intracellular domain] [Source:UniProtKB/Swiss-Prot;Acc:Q61982]
76893		ENSMUSG00000015714	76893	Lass2	LAG1 longevity assurance homolog 2 (Translocating chain-associating membrane protein homolog 3)(TRAM homolog 3) [Source:UniProtKB/Swiss-Prot;Acc:Q924Z4]
27423		ENSMUSG00000079853	100044243 16627 93969 27423 100044244	Klra1	T-cell surface glycoprotein YE1/48 (T lymphocyte antigen A1)(Lymphocyte antigen 49a)(Ly-49a) [Source:UniProtKB/Swiss-Prot;Acc:P20937]
12491		ENSMUSG00000002944	12491	Cd36	Platelet glycoprotein 4 (Platelet glycoprotein IV)(GPIV)(GPIIIB)(PAS IV)(PAS-4)(CD36 antigen) [Source:UniProtKB/Swiss-Prot;Acc:Q08857]
27371		ENSMUSG00000028071	27371	Sh2d2a	SH2 domain-containing protein 2A (Lck-associated adapter protein)(Lad)(Rlk/Itk-binding protein)(Ribp) [Source:UniProtKB/Swiss-Prot;Acc:Q9QXK9]
70747		ENSMUSG00000027858	70747	Tspan2	Tetraspanin-2 (Tspan-2) [Source:UniProtKB/Swiss-Prot;Acc:Q922J6]
67266		ENSMUSG00000029270	67266	Fam69a	Protein FAM69A [Source:UniProtKB/Swiss-Prot;Acc:Q9D6I7]
108151		ENSMUSG00000040254	100044160 108151	Sema3d	Semaphorin-3D Precursor [Source:UniProtKB/Swiss-Prot;Acc:Q8BH34]
53625		ENSMUSG00000051650	53625	B3gnt2	UDP-GlcNAc:betaGal beta-1,3-N-acetylglucosaminyltransferase 2 (EC 2.4.1.-)(Beta3Gn-T1)(BGnT-1)(Beta-1,3-galactosyltransferase 7)(Beta-1,3-GalTase 7)(Beta3Gal-T7)(b3Gal-T7)(Beta-3-Gx-T7)(UDP-galactose:beta-N-acetylglucosamine beta-1,3-galactosyltransferase 7)(UDP-Gal:beta-GlcNAc beta-1,3-galactosyltransferase 7) [Source:UniProtKB/Swiss-Prot;Acc:Q9Z222]
14697		ENSMUSG00000032192	14697	Gnb5	Guanine nucleotide-binding protein subunit beta-5 (Transducin beta chain 5)(Gbeta5) [Source:UniProtKB/Swiss-Prot;Acc:P62881]
65969		ENSMUSG00000026726	65969	Cubn	Cubilin Precursor (Intrinsic factor-cobalamin receptor) [Source:UniProtKB/Swiss-Prot;Acc:Q9JLB4]
14729		ENSMUSG00000047953	14729	Gp5	Platelet glycoprotein V Precursor (GPV)(CD42D antigen) [Source:UniProtKB/Swiss-Prot;Acc:O08742]
94222		ENSMUSG00000045591	94222	Olig3	Oligodendrocyte transcription factor 3 (Oligo3)(Oligodendrocyte-specific bHLH transcription factor 3)(Class B basic helix-loop-helix protein 7)(bHLHB7) [Source:UniProtKB/Swiss-Prot;Acc:Q6PFG8]
258434		ENSMUSG00000057424	258434	Olfr934	olfactory receptor 934 [Source:RefSeq peptide;Acc:NP_666653]
20612		ENSMUSG00000027322	20612	Siglec1	Sialoadhesin Precursor (Sialic acid-binding Ig-like lectin 1)(Siglec-1)(Sheep erythrocyte receptor)(SER)(CD169 antigen) [Source:UniProtKB/Swiss-Prot;Acc:Q62230]
269346		ENSMUSG00000027219	269346	Slc28a2	Sodium/nucleoside cotransporter 2 (Na(+)/nucleoside cotransporter 2)(Sodium-coupled nucleoside transporter 2)(Concentrative nucleoside transporter 2)(CNT 2)(Sodium/purine nucleoside cotransporter)(SPNT) [Source:UniProtKB/Swiss-Prot;Acc:O88627]
12351		ENSMUSG00000000805	12351	Car4	Carbonic anhydrase 4 Precursor (EC 4.2.1.1)(Carbonic anhydrase IV)(CA-IV)(Carbonate dehydratase IV) [Source:UniProtKB/Swiss-Prot;Acc:Q64444]
67067		ENSMUSG00000067847	67067	Romo1	Reactive oxygen species modulator 1 (ROS modulator 1)(Protein MGR2 homolog) [Source:UniProtKB/Swiss-Prot;Acc:P60603]
11520		ENSMUSG00000028494	11520	Adfp	Adipophilin (Adipose differentiation-related protein)(ADRP) [Source:UniProtKB/Swiss-Prot;Acc:P43883]
13645		ENSMUSG00000028017	13645	Egf	Pro-epidermal growth factor Precursor (EGF) [Contains Epidermal growth factor] [Source:UniProtKB/Swiss-Prot;Acc:P01132]
18526		ENSMUSG00000049100	18526	Pcdh10	protocadherin 10 isoform 3 [Source:RefSeq peptide;Acc:NP_001091641]
214359		ENSMUSG00000040616	214359	Tmem51	Transmembrane protein 51 [Source:UniProtKB/Swiss-Prot;Acc:Q99LG1]
14569		ENSMUSG00000021218	14569	Gdi2	Rab GDP dissociation inhibitor beta (Rab GDI beta)(Guanosine diphosphate dissociation inhibitor 2)(GDI-2)(GDI-3) [Source:UniProtKB/Swiss-Prot;Acc:Q61598]
29875		ENSMUSG00000030536	29875	Iqgap1	Ras GTPase-activating-like protein IQGAP1 [Source:UniProtKB/Swiss-Prot;Acc:Q9JKF1]
21827		ENSMUSG00000028047	21827	Thbs3	Thrombospondin-3 Precursor [Source:UniProtKB/Swiss-Prot;Acc:Q05895]
113856		ENSMUSG00000061653	113856	V1rb8	Vomeronasal type-1 receptor B8 (Vomeronasal type-1 receptor A13) [Source:UniProtKB/Swiss-Prot;Acc:Q9EQ45]
73649		ENSMUSG00000027015	73649	Cybrd1	Cytochrome b reductase 1 (EC 1.-.-.-)(Duodenal cytochrome b) [Source:UniProtKB/Swiss-Prot;Acc:Q925G2]
54614		ENSMUSG00000023007	54614	Prpf40b	Pre-mRNA-processing factor 40 homolog B (Huntingtin-interacting protein C)(Huntingtin yeast partner C) [Source:UniProtKB/Swiss-Prot;Acc:Q80W14]
78771		ENSMUSG00000021596	78771	Mctp1	multiple C2 domains, transmembrane 1 [Source:RefSeq peptide;Acc:NP_084450]
21872		ENSMUSG00000030516	21872	Tjp1	Tight junction protein ZO-1 (Zonula occludens protein 1)(Zona occludens protein 1)(Tight junction protein 1) [Source:UniProtKB/Swiss-Prot;Acc:P39447]
66972		ENSMUSG00000046329	66972	Slc25a23	Calcium-binding mitochondrial carrier protein SCaMC-3 (Small calcium-binding mitochondrial carrier protein 3)(Solute carrier family 25 member 23) [Source:UniProtKB/Swiss-Prot;Acc:Q6GQS1]
52120		ENSMUSG00000037260	52120	Hgsnat	Heparan-alpha-glucosaminide N-acetyltransferase (EC 2.3.1.78)(Transmembrane protein 76) [Source:UniProtKB/Swiss-Prot;Acc:Q3UDW8]
19126		ENSMUSG00000029086	19126	Prom1	Prominin-1 Precursor (Prominin-like protein 1)(Antigen AC133 homolog)(CD133 antigen) [Source:UniProtKB/Swiss-Prot;Acc:O54990]
68151		ENSMUSG00000028173	68151	Gpr177	Integral membrane protein GPR177 Precursor (Protein wntless homolog)(Protein evenness interrupted homolog)(EVI) [Source:UniProtKB/Swiss-Prot;Acc:Q6DID7]
17441		ENSMUSG00000076439	17441	Mog	Myelin-oligodendrocyte glycoprotein Precursor [Source:UniProtKB/Swiss-Prot;Acc:Q61885]
208117		ENSMUSG00000032375	208117	Aph1b	Gamma-secretase subunit APH-1B (APH-1b)(Aph-1beta) [Source:UniProtKB/Swiss-Prot;Acc:Q8C7N7]
16423		ENSMUSG00000055447	16423	Cd47	Leukocyte surface antigen CD47 Precursor (Integrin-associated protein)(IAP)(CD47 antigen) [Source:UniProtKB/Swiss-Prot;Acc:Q61735]
12297		ENSMUSG00000003352	12297	Cacnb3	Voltage-dependent L-type calcium channel subunit beta-3 (CAB3)(Calcium channel voltage-dependent subunit beta 3)(CCHB3) [Source:UniProtKB/Swiss-Prot;Acc:P54285]
83671		ENSMUSG00000030616	83671	Sytl2	Synaptotagmin-like protein 2 (Exophilin-4) [Source:UniProtKB/Swiss-Prot;Acc:Q99N50]
22296		ENSMUSG00000062818	22296	V1ra1	Vomeronasal type-1 receptor A1 (mV1R1)(Vomeronasal type-1 receptor A8)(Pheromone receptor 1) [Source:UniProtKB/Swiss-Prot;Acc:Q8VIC6]
19317		ENSMUSG00000062078	19317	Qk	Protein quaking (MqkI)(qkI) [Source:UniProtKB/Swiss-Prot;Acc:Q9QYS9]
22632		ENSMUSG00000021264	22632	Yy1	Transcriptional repressor protein YY1 (Yin and yang 1)(YY-1)(Delta transcription factor)(NF-E1)(UCR-motif DNA-binding protein) [Source:UniProtKB/Swiss-Prot;Acc:Q00899]
14012		ENSMUSG00000032092	14012	Mpzl2	Myelin protein zero-like protein 2 Precursor (Epithelial V-like antigen 1) [Source:UniProtKB/Swiss-Prot;Acc:O70255]
11418		ENSMUSG00000020704	11418	Accn1	Amiloride-sensitive cation channel 1, neuronal (Amiloride-sensitive brain sodium channel)(Acid-sensing ion channel 2)(Brain sodium channel 1)(BNaC1) [Source:UniProtKB/Swiss-Prot;Acc:Q925H0]
71733		ENSMUSG00000006342	71733	Susd2	Sushi domain-containing protein 2 Precursor [Source:UniProtKB/Swiss-Prot;Acc:Q9DBX3]
60425		ENSMUSG00000024871	60425	Doc2g	Double C2-like domain-containing protein gamma (Doc2-gamma) [Source:UniProtKB/Swiss-Prot;Acc:Q9ESN1]
21929		ENSMUSG00000019850	21929	Tnfaip3	Tumor necrosis factor, alpha-induced protein 3 (EC 3.-.-.-)(Putative DNA-binding protein A20)(Zinc finger protein A20) [Source:UniProtKB/Swiss-Prot;Acc:Q60769]
17920		ENSMUSG00000033577	17920	Myo6	Myosin-VI [Source:UniProtKB/Swiss-Prot;Acc:Q64331]
74315		ENSMUSG00000019189	74315	Rnf145	RING finger protein 145 [Source:UniProtKB/Swiss-Prot;Acc:Q5SWK7]
13732		ENSMUSG00000040212	13732	Emp3	Epithelial membrane protein 3 (EMP-3)(Protein YMP)(Hematopoietic neural membrane protein)(HNMP-1) [Source:UniProtKB/Swiss-Prot;Acc:O35912]
67387		ENSMUSG00000026111	67387	Unc50	Protein unc-50 homolog (Periodontal ligament-specific protein 22)(PDLs22) [Source:UniProtKB/Swiss-Prot;Acc:Q9CQ61]
68010		ENSMUSG00000024232	68010	Bambi	BMP and activin membrane-bound inhibitor homolog Precursor (Putative transmembrane protein NMA) [Source:UniProtKB/Swiss-Prot;Acc:Q9D0L6]
75689		ENSMUSG00000020928	75689	Higd1b	HIG1 domain family member 1B [Source:UniProtKB/Swiss-Prot;Acc:Q99JY6]
20525		ENSMUSG00000028645	20525	Slc2a1	Solute carrier family 2, facilitated glucose transporter member 1 (Glucose transporter type 1, erythrocyte/brain)(GLUT-1)(GT1) [Source:UniProtKB/Swiss-Prot;Acc:P17809]
110454		ENSMUSG00000075602	110454	Ly6a	Lymphocyte antigen 6A-2/6E-1 Precursor (Ly-6A.2/Ly-6E.1)(T-cell-activating protein)(TAP)(Stem cell antigen 1)(SCA-1) [Source:UniProtKB/Swiss-Prot;Acc:P05533]
66569		ENSMUSG00000061666	66569	Gdpd1	Glycerophosphodiester phosphodiesterase domain-containing protein 1 (EC 3.1.-.-)(Glycerophosphodiester phosphodiesterase 4) [Source:UniProtKB/Swiss-Prot;Acc:Q9CRY7]
20848		ENSMUSG00000004040	100045296 20848	Stat3	Signal transducer and activator of transcription 3 (Acute-phase response factor) [Source:UniProtKB/Swiss-Prot;Acc:P42227]
12042		ENSMUSG00000028191	12042	Bcl10	B-cell lymphoma/leukemia 10 (B-cell CLL/lymphoma 10)(Bcl-10)(CED-3/ICH-1 prodomain homologous E10-like regulator)(mCIPER)(CARD-containing molecule enhancing NF-kappa-B)(Cellular homolog of vCARMEN)(cCARMEN)(Mammalian CARD-containing adapter molecule E10)(mE10)(Cellular-E10)(c-E10)(CARD-like apoptotic protein)(mCLAP) [Source:UniProtKB/Swiss-Prot;Acc:Q9Z0H7]
19158		ENSMUSG00000003269	19158	Cyth2	Cytohesin-2 (PH, SEC7 and coiled-coil domain-containing protein 2)(CLM2)(SEC7 homolog B)(mSec7-2) [Source:UniProtKB/Swiss-Prot;Acc:P63034]
71435		ENSMUSG00000036591	71435	Arhgap21	Rho GTPase-activating protein 21 (Rho-type GTPase-activating protein 21)(Rho GTPase-activating protein 10) [Source:UniProtKB/Swiss-Prot;Acc:Q6DFV3]
22301		ENSMUSG00000070448	22301	Vmn2r89	vomeronasal 2, receptor 89 isoform 2 [Source:RefSeq peptide;Acc:NP_033513]
64817		ENSMUSG00000028369	64817	Svep1	Sushi, von Willebrand factor type A, EGF and pentraxin domain-containing protein 1 Precursor (Polydom) [Source:UniProtKB/Swiss-Prot;Acc:A2AVA0]
73166		ENSMUSG00000024799	73166	Tm7sf2	Delta(14)-sterol reductase (Delta-14-SR)(EC 1.3.1.70)(C-14 sterol reductase)(Sterol C14-reductase)(Transmembrane 7 superfamily member 2) [Source:UniProtKB/Swiss-Prot;Acc:Q71KT5]
84094		ENSMUSG00000034845	84094	Plvap	Plasmalemma vesicle-associated protein (Plasmalemma vesicle protein 1)(PV-1)(MECA-32 antigen) [Source:UniProtKB/Swiss-Prot;Acc:Q91VC4]
66889		ENSMUSG00000031438	66889	Rnf128	E3 ubiquitin-protein ligase RNF128 Precursor (EC 6.3.2.-)(RING finger protein 128)(Gene related to anergy in lymphocytes protein)(Goliath-related E3 ubiquitin-protein ligase 1) [Source:UniProtKB/Swiss-Prot;Acc:Q9D304]
57014		ENSMUSG00000008590	57014	Htr3b	5-hydroxytryptamine receptor 3B Precursor (5-HT-3B)(5-HT3B)(Serotonin receptor 3B) [Source:UniProtKB/Swiss-Prot;Acc:Q9JHJ5]
21936		ENSMUSG00000041954	21936	Tnfrsf18	Tumor necrosis factor receptor superfamily member 18 Precursor (Glucocorticoid-induced TNFR-related protein) [Source:UniProtKB/Swiss-Prot;Acc:O35714]
14704		ENSMUSG00000071658	14704	Gng3	Guanine nucleotide-binding protein G(I)/G(S)/G(O) subunit gamma-3 Precursor [Source:UniProtKB/Swiss-Prot;Acc:P63216]
14685		ENSMUSG00000034837	14685	Gnat1	Guanine nucleotide-binding protein G(t) subunit alpha-1 (Transducin alpha-1 chain) [Source:UniProtKB/Swiss-Prot;Acc:P20612]
14451		ENSMUSG00000052957	14451	Gas1	Growth arrest-specific protein 1 Precursor (GAS-1) [Source:UniProtKB/Swiss-Prot;Acc:Q01721]
258264		ENSMUSG00000057179	100045362 258264	Olfr747	olfactory receptor 747 [Source:RefSeq peptide;Acc:NP_997039]
11690		ENSMUSG00000060063	11690	Alox5ap	Arachidonate 5-lipoxygenase-activating protein (FLAP)(MK-886-binding protein) [Source:UniProtKB/Swiss-Prot;Acc:P30355]
634555		ENSMUSG00000035351	69736 634555	Nup37	Nucleoporin Nup37 [Source:UniProtKB/Swiss-Prot;Acc:Q9CWU9]
66999		ENSMUSG00000015804	66999	Med28	Mediator of RNA polymerase II transcription subunit 28 (Mediator complex subunit 28) [Source:UniProtKB/Swiss-Prot;Acc:Q920D3]
20540		ENSMUSG00000000958	20540	Slc7a7	Y+L amino acid transporter 1 (y(+)L-type amino acid transporter 1)(y+LAT-1)(Y+LAT1)(Solute carrier family 7 member 7) [Source:UniProtKB/Swiss-Prot;Acc:Q9Z1K8]
15979		ENSMUSG00000020009	15979	Ifngr1	Interferon-gamma receptor alpha chain Precursor (IFN-gamma-R1)(CD119 antigen) [Source:UniProtKB/Swiss-Prot;Acc:P15261]
23890		ENSMUSG00000040229	23890	Gpr34	Probable G-protein coupled receptor 34 [Source:UniProtKB/Swiss-Prot;Acc:Q9R1K6]
74194		ENSMUSG00000017144	74194	Rnd3	Rho-related GTP-binding protein RhoE Precursor (Rho family GTPase 3)(Rnd3) [Source:UniProtKB/Swiss-Prot;Acc:P61588]
66058		ENSMUSG00000023367	66058	Tmem176a	Transmembrane protein 176A (Kidney-expressed gene 2 protein)(Gene signature 188) [Source:UniProtKB/Swiss-Prot;Acc:Q9DCS1]
65116		ENSMUSG00000007837	65116	Prrg2	Transmembrane gamma-carboxyglutamic acid protein 2 Precursor (Proline-rich gamma-carboxyglutamic acid protein 2)(Proline-rich Gla protein 2)(NEDD4 WW domain-binding protein 1) [Source:UniProtKB/Swiss-Prot;Acc:Q8R182]
59010		ENSMUSG00000005803	59010	Sqrdl	Sulfide:quinone oxidoreductase, mitochondrial Precursor (EC 1.-.-.-) [Source:UniProtKB/Swiss-Prot;Acc:Q9R112]
110962		ENSMUSG00000025409	110962	Mbd6	methyl-CpG binding domain protein 6 [Source:RefSeq peptide;Acc:NP_149063]
67220		ENSMUSG00000015745	67220	Plekho1	Pleckstrin homology domain-containing family O member 1 [Source:UniProtKB/Swiss-Prot;Acc:Q9JIY0]
19027		ENSMUSG00000020570	19027	Sypl	Synaptophysin-like protein 1 (Pantophysin) [Source:UniProtKB/Swiss-Prot;Acc:O09117]
14057		ENSMUSG00000021474	14057	Sfxn1	Sideroflexin-1 [Source:UniProtKB/Swiss-Prot;Acc:Q99JR1]
14950		ENSMUSG00000019188	14950	H13	Minor histocompatibility antigen H13 (EC 3.4.23.-)(Signal peptide peptidase)(Presenilin-like protein 3) [Source:UniProtKB/Swiss-Prot;Acc:Q9D8V0]
73381		ENSMUSG00000074127	73381	Cmtm2a	CKLF-like MARVEL transmembrane domain-containing protein 2A (Chemokine-like factor superfamily member 2A) [Source:UniProtKB/Swiss-Prot;Acc:Q9DAR1]
13386		ENSMUSG00000040856	13386	Dlk1	Protein delta homolog 1 Precursor (DLK-1)(Preadipocyte factor 1)(Pref-1)(Adipocyte differentiation inhibitor protein) [Contains Fetal antigen 1(FA1)] [Source:UniProtKB/Swiss-Prot;Acc:Q09163]
57778		ENSMUSG00000055805	57778	Fmnl1	Formin-like protein 1 (Formin-related protein) [Source:UniProtKB/Swiss-Prot;Acc:Q9JL26]
67182		ENSMUSG00000028716	67182	Pdzk1ip1	PDZK1-interacting protein 1 (17 kDa membrane-associated protein) [Source:UniProtKB/Swiss-Prot;Acc:Q9CQH0]
16512		ENSMUSG00000037579	16512	Kcnh3	Potassium voltage-gated channel subfamily H member 3 (Voltage-gated potassium channel subunit Kv12.2)(Ether-a-go-go-like potassium channel 2)(ELK channel 2)(mElk2) [Source:UniProtKB/Swiss-Prot;Acc:Q9WVJ0]
11789		ENSMUSG00000005871	100048863 11789	Apc	Adenomatous polyposis coli protein (Protein APC)(mAPC) [Source:UniProtKB/Swiss-Prot;Acc:Q61315]
13123		ENSMUSG00000039519	13123	Cyp7b1	25-hydroxycholesterol 7-alpha-hydroxylase (Oxysterol 7-alpha-hydroxylase)(EC 1.14.13.100)(Cytochrome P450 7B1)(HCT-1) [Source:UniProtKB/Swiss-Prot;Acc:Q60991]
56384		ENSMUSG00000005299	56384	Letm1	LETM1 and EF-hand domain-containing protein 1, mitochondrial Precursor (Leucine zipper-EF-hand-containing transmembrane protein 1) [Source:UniProtKB/Swiss-Prot;Acc:Q9Z2I0]
66960		ENSMUSG00000026767	66960	2310047O13Rik	Protein CARP [Source:UniProtKB/Swiss-Prot;Acc:Q9CV28]
16193		ENSMUSG00000025746	16193	Il6	Interleukin-6 Precursor (IL-6)(Interleukin HP-1)(B-cell hybridoma growth factor) [Source:UniProtKB/Swiss-Prot;Acc:P08505]
14745		ENSMUSG00000038668	14745	Lpar1	Lysophosphatidic acid receptor 1 (LPA receptor 1)(LPA-1)(Lysophosphatidic acid receptor Edg-2)(Rec1.3)(VZG-1) [Source:UniProtKB/Swiss-Prot;Acc:P61793]
68774		ENSMUSG00000024679	68774	Ms4a6d	Membrane-spanning 4-domains subfamily A member 6D (CD20 antigen-like 8) [Source:UniProtKB/Swiss-Prot;Acc:Q99N07]
98363		ENSMUSG00000026255	98363	Efhd1	EF-hand domain-containing protein D1 (EF-hand domain-containing protein 1)(Swiprosin-2) [Source:UniProtKB/Swiss-Prot;Acc:Q9D4J1]
19682		ENSMUSG00000025350	19682	Rdh5	retinol dehydrogenase 5 [Source:RefSeq peptide;Acc:NP_598767]
22329		ENSMUSG00000027962	22329	Vcam1	Vascular cell adhesion protein 1 Precursor (V-CAM 1)(CD106 antigen) [Source:UniProtKB/Swiss-Prot;Acc:P29533]
67830		ENSMUSG00000029048	67830	Rer1	Protein RER1 [Source:UniProtKB/Swiss-Prot;Acc:Q9CQU3]
26570		ENSMUSG00000027737	26570	Slc7a11	Cystine/glutamate transporter (Amino acid transport system xc-)(xCT)(Solute carrier family 7 member 11) [Source:UniProtKB/Swiss-Prot;Acc:Q9WTR6]
12309		ENSMUSG00000040808	12309	S100g	Protein S100-G (S100 calcium-binding protein G)(Vitamin D-dependent calcium-binding protein, intestinal)(CABP)(Calbindin-D9k) [Source:UniProtKB/Swiss-Prot;Acc:P97816]
28248		ENSMUSG00000041698	28248	Slco1a1	Solute carrier organic anion transporter family member 1A1 (Solute carrier family 21 member 1)(Sodium-independent organic anion-transporting polypeptide 1)(OATP1) [Source:UniProtKB/Swiss-Prot;Acc:Q9QXZ6]
15587		ENSMUSG00000010047	15587	Hyal2	Hyaluronidase-2 Precursor (Hyal-2)(EC 3.2.1.35)(Hyaluronoglucosaminidase-2)(LUCA-2) [Source:UniProtKB/Swiss-Prot;Acc:O35632]
16950		ENSMUSG00000000693	16950	Loxl3	Lysyl oxidase homolog 3 Precursor (EC 1.4.3.-)(Lysyl oxidase-like protein 3)(Lysyl oxidase-related protein 2) [Source:UniProtKB/Swiss-Prot;Acc:Q9Z175]
69137		ENSMUSG00000031937	69137	2200002K05Rik	Uncharacterized protein C11orf90 homolog Precursor [Source:UniProtKB/Swiss-Prot;Acc:Q9D806]
81877		ENSMUSG00000033327	81877	Tnxb	tenascin XB [Source:RefSeq peptide;Acc:NP_112453]
216157		ENSMUSG00000013858	216157	ORF61	Membralin [Source:UniProtKB/Swiss-Prot;Acc:Q8CIV2]
16542		ENSMUSG00000062960	16542	Kdr	Vascular endothelial growth factor receptor 2 Precursor (VEGFR-2)(EC 2.7.10.1)(Protein-tyrosine kinase receptor flk-1)(Fetal liver kinase 1)(Kinase NYK)(CD309 antigen) [Source:UniProtKB/Swiss-Prot;Acc:P35918]
71393		ENSMUSG00000021752	71393	Kctd6	BTB/POZ domain-containing protein KCTD6 [Source:UniProtKB/Swiss-Prot;Acc:Q8BNL5]
57251		ENSMUSG00000066899	57251	Olfr870	olfactory receptor 870 [Source:RefSeq peptide;Acc:NP_667115]
70617		ENSMUSG00000050549	70617	5730508B09Rik	Uncharacterized protein C4orf32 homolog [Source:UniProtKB/Swiss-Prot;Acc:Q9CZL2]
14739		ENSMUSG00000043895	14739	S1pr2	Sphingosine 1-phosphate receptor 2 (S1P receptor 2)(S1P2)(Sphingosine 1-phosphate receptor Edg-5)(S1P receptor Edg-5)(Endothelial differentiation G-protein coupled receptor 5)(Lysophospholipid receptor B2) [Source:UniProtKB/Swiss-Prot;Acc:P52592]
74614		ENSMUSG00000027670	74614	4833422F24Rik	Transmembrane protein C20orf123 homolog [Source:UniProtKB/Swiss-Prot;Acc:Q9D611]
258868		ENSMUSG00000070311	258868	Olfr894	olfactory receptor 894 [Source:RefSeq peptide;Acc:NP_667079]
241226		ENSMUSG00000026768	241226	Itga8	Integrin alpha-8 Precursor [Contains Integrin alpha-8 heavy chain;Integrin alpha-8 light chain] [Source:UniProtKB/Swiss-Prot;Acc:A2ARA8]
18484		ENSMUSG00000026335	18484	Pam	Peptidyl-glycine alpha-amidating monooxygenase Precursor (PAM) [Includes Peptidylglycine alpha-hydroxylating monooxygenase(PHM)(EC 1.14.17.3);Peptidyl-alpha-hydroxyglycine alpha-amidating lyase(EC 4.3.2.5)(Peptidylamidoglycolate lyase)(PAL)] [Source:UniProtKB/Swiss-Prot;Acc:P97467]
107022		ENSMUSG00000001700	107022	Gramd3	GRAM domain-containing protein 3 [Source:UniProtKB/Swiss-Prot;Acc:Q6PEM6]
19041		ENSMUSG00000039457	19041	Ppl	Periplakin [Source:UniProtKB/Swiss-Prot;Acc:Q9R269]
18212		ENSMUSG00000055254	18212	Ntrk2	BDNF/NT-3 growth factors receptor Precursor (EC 2.7.10.1)(Neurotrophic tyrosine kinase receptor type 2)(TrkB tyrosine kinase)(GP145-TrkB/GP95-TrkB)(Trk-B) [Source:UniProtKB/Swiss-Prot;Acc:P15209]
407243		ENSMUSG00000019755	407243	Tmem189	Transmembrane protein 189 [Source:UniProtKB/Swiss-Prot;Acc:Q99LQ7]
20443		ENSMUSG00000032038	20443	St3gal4	CMP-N-acetylneuraminate-beta-galactosamide-alpha-2,3-sialyltransferase (Beta-galactoside alpha-2,3-sialyltransferase)(EC 2.4.99.-)(Alpha 2,3-sialyltransferase IV)(Alpha 2,3-ST)(SIAT4-C) [Source:UniProtKB/Swiss-Prot;Acc:Q91Y74]
12861		ENSMUSG00000041697	12861	Cox6a1	Cytochrome c oxidase subunit 6A1, mitochondrial Precursor (Cytochrome c oxidase polypeptide VIa-liver) [Source:UniProtKB/Swiss-Prot;Acc:P43024]
19415		ENSMUSG00000029602	19415	Rasal1	RasGAP-activating-like protein 1 [Source:UniProtKB/Swiss-Prot;Acc:Q9Z268]
12877		ENSMUSG00000025586	12877	Cpeb1	Cytoplasmic polyadenylation element-binding protein 1 (CPE-binding protein 1)(CPE-BP1)(mCPEB-1)(mCPEB) [Source:UniProtKB/Swiss-Prot;Acc:P70166]
20775		ENSMUSG00000022351	20775	Sqle	Squalene monooxygenase (EC 1.14.99.7)(Squalene epoxidase)(SE) [Source:UniProtKB/Swiss-Prot;Acc:P52019]
18196		ENSMUSG00000029126	18196	Nsg1	Neuron-specific protein family member 1 (Brain neuron cytoplasmic protein 1)(p21)(M234) [Source:UniProtKB/Swiss-Prot;Acc:Q62092]
84652		ENSMUSG00000028995	84652	Fam126a	Hyccin (Protein FAM126A)(Down-regulated by CTNNB1 protein A) [Source:UniProtKB/Swiss-Prot;Acc:Q6P9N1]
14089		ENSMUSG00000000392	14089	Fap	Seprase (EC 3.4.21.-)(Fibroblast activation protein alpha)(Integral membrane serine protease) [Source:UniProtKB/Swiss-Prot;Acc:P97321]
20338		ENSMUSG00000020964	20338	Sel1l	Protein sel-1 homolog 1 Precursor (Suppressor of lin-12-like protein 1)(Sel-1L) [Source:UniProtKB/Swiss-Prot;Acc:Q9Z2G6]
71914		ENSMUSG00000029338	71914	Antxr2	Anthrax toxin receptor 2 Precursor [Source:UniProtKB/Swiss-Prot;Acc:Q6DFX2]
26368		ENSMUSG00000007209	26368	Ceacam9	carcinoembryonic antigen-related cell adhesion molecule 9 [Source:RefSeq peptide;Acc:NP_036057]
15492		ENSMUSG00000027871	15492	Hsd3b1	3 beta-hydroxysteroid dehydrogenase/Delta 5-->4-isomerase type 1 (3-beta-HSD I) [Includes 3-beta-hydroxy-Delta(5)-steroid dehydrogenase(EC 1.1.1.145)(3-beta-hydroxy-5-ene steroid dehydrogenase)(Progesterone reductase);Steroid Delta-isomerase(EC 5.3.3.1)(Delta-5-3-ketosteroid isomerase)] [Source:UniProtKB/Swiss-Prot;Acc:P24815]
67443		ENSMUSG00000031812	67443	Map1lc3b	Microtubule-associated proteins 1A/1B light chain 3B Precursor (Microtubule-associated protein 1 light chain 3 beta)(MAP1A/1B light chain 3 B)(MAP1A/MAP1B LC3 B)(MAP1 light chain 3-like protein 2)(Autophagy-related protein LC3 B)(Autophagy-related ubiquitin-like modifier LC3 B) [Source:UniProtKB/Swiss-Prot;Acc:Q9CQV6]
14678		ENSMUSG00000032562	14678 100045883	Gnai2	Guanine nucleotide-binding protein G(i), alpha-2 subunit (Adenylate cyclase-inhibiting G alpha protein) [Source:UniProtKB/Swiss-Prot;Acc:P08752]
21687		ENSMUSG00000006386	21687	Tek	Angiopoietin-1 receptor Precursor (EC 2.7.10.1)(Tyrosine-protein kinase receptor TIE-2)(mTIE2)(Tyrosine-protein kinase receptor TEK)(Tunica interna endothelial cell kinase)(p140 TEK)(HYK)(STK1)(CD202b antigen) [Source:UniProtKB/Swiss-Prot;Acc:Q02858]
26888		ENSMUSG00000030148	26888	Clec4a2	C-type lectin domain family 4 member A (C-type lectin superfamily member 6)(Dendritic cell immunoreceptor) [Source:UniProtKB/Swiss-Prot;Acc:Q9QZ15]
20303		ENSMUSG00000018930	20303	Ccl4	C-C motif chemokine 4 Precursor (Small-inducible cytokine A4)(Macrophage inflammatory protein 1-beta)(MIP-1-beta)(Immune activation protein 2)(ACT-2)(ACT2)(Protein H400)(SIS-gamma) [Source:UniProtKB/Swiss-Prot;Acc:P14097]
27801		ENSMUSG00000060166	27801	Zdhhc8	Probable palmitoyltransferase ZDHHC8 (EC 2.3.1.-)(Zinc finger DHHC domain-containing protein 8)(DHHC-8) [Source:UniProtKB/Swiss-Prot;Acc:Q5Y5T5]
14688		ENSMUSG00000029064	14688	Gnb1	Guanine nucleotide-binding protein G(I)/G(S)/G(T) subunit beta-1 (Transducin beta chain 1) [Source:UniProtKB/Swiss-Prot;Acc:P62874]
76965		ENSMUSG00000075478	76965	Slitrk1	SLIT and NTRK-like protein 1 Precursor [Source:UniProtKB/Swiss-Prot;Acc:Q810C1]
12523		ENSMUSG00000038147	12523	Cd84	SLAM family member 5 Precursor (Signaling lymphocytic activation molecule 5)(Leukocyte differentiation antigen CD84)(CD84 antigen) [Source:UniProtKB/Swiss-Prot;Acc:Q18PI6]
54199		ENSMUSG00000043953	54199	Ccrl2	C-C chemokine receptor-like 2 (Lipopolysacharide-inducible C-C chemokine receptor)(L-CCR)(G-protein coupled beta chemokine receptor)(Chemokine receptor CCR11) [Source:UniProtKB/Swiss-Prot;Acc:O35457]
21824		ENSMUSG00000074743	21824	Thbd	Thrombomodulin Precursor (TM)(Fetomodulin)(CD141 antigen) [Source:UniProtKB/Swiss-Prot;Acc:P15306]
18549		ENSMUSG00000027419	18549	Pcsk2	Neuroendocrine convertase 2 Precursor (NEC 2)(EC 3.4.21.94)(Prohormone convertase 2)(Proprotein convertase 2)(PC2)(KEX2-like endoprotease 2) [Source:UniProtKB/Swiss-Prot;Acc:P21661]
63959		ENSMUSG00000023942	63959	Slc29a1	Equilibrative nucleoside transporter 1 (Equilibrative nitrobenzylmercaptopurine riboside-sensitive nucleoside transporter)(Equilibrative NBMPR-sensitive nucleoside transporter)(Nucleoside transporter, es-type)(Solute carrier family 29 member 1) [Source:UniProtKB/Swiss-Prot;Acc:Q9JIM1]
100046168		ENSMUSG00000024425	65113 100046168	Ndfip1	NEDD4 family-interacting protein 1 (NEDD4 WW domain-binding protein 5) [Source:UniProtKB/Swiss-Prot;Acc:Q8R0W6]
93695		ENSMUSG00000029816	93695	Gpnmb	Transmembrane glycoprotein NMB Precursor (Dendritic cell-associated transmembrane protein)(DC-HIL) [Source:UniProtKB/Swiss-Prot;Acc:Q99P91]
22360		ENSMUSG00000048978	22360	Nrsn1	Neurensin-1 (Vesicular membrane protein of 24 kDa)(Vesicular membrane protein p24)(Neuro-p24) [Source:UniProtKB/Swiss-Prot;Acc:P97799]
109711		ENSMUSG00000015143	109711	Actn1	Alpha-actinin-1 (Alpha-actinin cytoskeletal isoform)(Non-muscle alpha-actinin-1)(F-actin cross-linking protein) [Source:UniProtKB/Swiss-Prot;Acc:Q7TPR4]
14594		ENSMUSG00000035778	14594	Ggta1	N-acetyllactosaminide alpha-1,3-galactosyltransferase (EC 2.4.1.87)(UDP-galactose:beta-D-galactosyl-1,4-N-acetyl-D-glucosaminide alpha-1,3-galactosyltransferase)(Galactosyltransferase) [Source:UniProtKB/Swiss-Prot;Acc:P23336]
114713		ENSMUSG00000032413	114713	Rasa2	Ras GTPase-activating protein 2 (GAP1m) [Source:UniProtKB/Swiss-Prot;Acc:P58069]
16184		ENSMUSG00000026770	16184	Il2ra	Interleukin-2 receptor alpha chain Precursor (IL-2 receptor alpha subunit)(IL-2-RA)(IL2-RA)(p55)(CD25 antigen) [Source:UniProtKB/Swiss-Prot;Acc:P01590]
17096		ENSMUSG00000042228	17096	Lyn	Tyrosine-protein kinase Lyn (EC 2.7.10.2) [Source:UniProtKB/Swiss-Prot;Acc:P25911]
14131		ENSMUSG00000059498	14131	Fcgr3	Low affinity immunoglobulin gamma Fc region receptor III Precursor (IgG Fc receptor III)(Fc-gamma RIII)(FcRIII)(CD16 antigen) [Source:UniProtKB/Swiss-Prot;Acc:P08508]
243764		ENSMUSG00000045613	243764	Chrm2	Muscarinic acetylcholine receptor M2 [Source:UniProtKB/Swiss-Prot;Acc:Q9ERZ4]
30925		ENSMUSG00000015314	30925	Slamf6	SLAM family member 6 Precursor (Lymphocyte antigen 108) [Source:UniProtKB/Swiss-Prot;Acc:Q9ET39]
70377		ENSMUSG00000009092	70377	Derl3	Derlin-3 (Der1-like protein 3)(Degradation in endoplasmic reticulum protein 3)(Protein IZP6) [Source:UniProtKB/Swiss-Prot;Acc:Q9D8K3]
12482		ENSMUSG00000024673	12482	Ms4a1	B-lymphocyte antigen CD20 (Membrane-spanning 4-domains subfamily A member 1)(B-cell differentiation antigen Ly-44)(Lymphocyte antigen 44)(CD20 antigen) [Source:UniProtKB/Swiss-Prot;Acc:P19437]
67878		ENSMUSG00000037720	67878	Tmem33	Transmembrane protein 33 (Protein DB83) [Source:UniProtKB/Swiss-Prot;Acc:Q9CR67]
23888		ENSMUSG00000058571	100045283 23888	Gpc6	Glypican-6 Precursor [Contains Secreted glypican-6] [Source:UniProtKB/Swiss-Prot;Acc:Q9R087]
72293		ENSMUSG00000021567	72293	Nkd2	Protein naked cuticle homolog 2 (Naked-2)(mNkd2) [Source:UniProtKB/Swiss-Prot;Acc:Q8VE28]
54218		ENSMUSG00000067370	100045158 54218	B3galt4	Beta-1,3-galactosyltransferase 4 (Beta-1,3-GalTase 4)(Beta3Gal-T4)(b3Gal-T4)(EC 2.4.1.62)(GAL-T2)(Ganglioside galactosyltransferase)(UDP-galactose:beta-N-acetyl-galactosamine-beta-1,3-galactosyltransferase) [Source:UniProtKB/Swiss-Prot;Acc:Q9Z0F0]
70551		ENSMUSG00000041594	70551	Tmtc4	Transmembrane and TPR repeat-containing protein 4 [Source:UniProtKB/Swiss-Prot;Acc:Q8BG19]
54710		ENSMUSG00000070407	54710	Hs3st3b1	Heparan sulfate glucosamine 3-O-sulfotransferase 3B1 (EC 2.8.2.30)(Heparan sulfate D-glucosaminyl 3-O-sulfotransferase 3B1)(Heparan sulfate 3-O-sulfotransferase 3B1)(m3-OST-3B) [Source:UniProtKB/Swiss-Prot;Acc:Q9QZS6]
11767		ENSMUSG00000003033	11767	Ap1m1	AP-1 complex subunit mu-1 (Adaptor-related protein complex 1 mu-1 subunit)(Adaptor protein complex AP-1 mu-1 subunit)(Golgi adaptor HA1/AP1 adaptin mu-1 subunit)(Mu-adaptin 1)(AP-mu chain family member mu1A)(Mu1A-adaptin)(Clathrin assembly protein complex 1 medium chain 1)(Clathrin coat assembly protein AP47)(Clathrin coat-associated protein AP47) [Source:UniProtKB/Swiss-Prot;Acc:P35585]
192176		ENSMUSG00000031328	192176	Flna	Filamin-A (Alpha-filamin)(Filamin-1)(Endothelial actin-binding protein)(Actin-binding protein 280)(ABP-280)(Non-muscle filamin) [Source:UniProtKB/Swiss-Prot;Acc:Q8BTM8]
11432		ENSMUSG00000002103	11432	Acp2	Lysosomal acid phosphatase Precursor (LAP)(EC 3.1.3.2) [Source:UniProtKB/Swiss-Prot;Acc:P24638]
75769		ENSMUSG00000033342	75769	4833424O15Rik	Lipid phosphate phosphatase-related protein type 5 (EC 3.1.3.-)(Plasticity-related gene 5 protein)(PRG-5) [Source:UniProtKB/Swiss-Prot;Acc:Q8BJ52]
142980		ENSMUSG00000031639	142980	Tlr3	Toll-like receptor 3 Precursor (CD283 antigen) [Source:UniProtKB/Swiss-Prot;Acc:Q99MB1]
113847		ENSMUSG00000068231	113847	V1ra5	Vomeronasal type-1 receptor A5 (Vomeronasal type-1 receptor A2) [Source:UniProtKB/Swiss-Prot;Acc:Q8VIC9]
12722		ENSMUSG00000056025	12722	Clca1	chloride channel calcium activated 1 [Source:RefSeq peptide;Acc:NP_034029]
19217		ENSMUSG00000037759	19217	Ptger2	Prostaglandin E2 receptor EP2 subtype (Prostanoid EP2 receptor)(PGE receptor, EP2 subtype) [Source:UniProtKB/Swiss-Prot;Acc:Q62053]
93683		ENSMUSG00000032252	93683	Glce	D-glucuronyl C5-epimerase (EC 5.1.3.-)(Heparin/heparan sulfate:glucuronic acid C5-epimerase) [Source:UniProtKB/Swiss-Prot;Acc:Q9EPS3]
24059		ENSMUSG00000032548	24059	Slco2a1	Solute carrier organic anion transporter family member 2A1 (Solute carrier family 21 member 2)(Prostaglandin transporter)(PGT) [Source:UniProtKB/Swiss-Prot;Acc:Q9EPT5]
70008		ENSMUSG00000015405	70008	Ace2	Angiotensin-converting enzyme 2 Precursor (EC 3.4.17.-)(ACE-related carboxypeptidase) [Contains Processed angiotensin-converting enzyme 2] [Source:UniProtKB/Swiss-Prot;Acc:Q8R0I0]
17311		ENSMUSG00000019966	17311	Kitl	Kit ligand Precursor (C-kit ligand)(Stem cell factor)(SCF)(Mast cell growth factor)(MGF)(Hematopoietic growth factor KL)(Steel factor) [Source:UniProtKB/Swiss-Prot;Acc:P20826]
19337		ENSMUSG00000031104	19337	Rab33a	Ras-related protein Rab-33A (Small GTP-binding protein S10) [Source:UniProtKB/Swiss-Prot;Acc:P97950]
17202		ENSMUSG00000047259	17202	Mc4r	Melanocortin receptor 4 (MC4-R) [Source:UniProtKB/Swiss-Prot;Acc:P56450]
11553		ENSMUSG00000045318	11553 100045767	Adra2c	Alpha-2C adrenergic receptor (Alpha-2C adrenoreceptor)(Alpha-2C adrenoceptor)(Alpha-2 adrenergic receptor subtype C4) [Source:UniProtKB/Swiss-Prot;Acc:Q01337]
54419		ENSMUSG00000023906	54419	Cldn6	Claudin-6 (Skullin) [Source:UniProtKB/Swiss-Prot;Acc:Q9Z262]
20652		ENSMUSG00000026600	20652	Soat1	Sterol O-acyltransferase 1 (EC 2.3.1.26)(Cholesterol acyltransferase 1)(Acyl coenzyme A:cholesterol acyltransferase 1)(ACAT-1) [Source:UniProtKB/Swiss-Prot;Acc:Q61263]
17069		ENSMUSG00000022587	17069	Ly6e	Lymphocyte antigen 6E Precursor (Ly-6E)(Thymic shared antigen 1)(TSA-1)(Stem cell antigen 2) [Source:UniProtKB/Swiss-Prot;Acc:Q64253]
109672		ENSMUSG00000024646	109672	Cyb5	Cytochrome b5 [Source:UniProtKB/Swiss-Prot;Acc:P56395]
79202		ENSMUSG00000010751	79202	Tnfrsf22	Tumor necrosis factor receptor superfamily member 22 (Tumor necrosis factor receptor p60 homolog 2)(TNF receptor family member SOBa)(Decoy TRAIL receptor 2)(TNF receptor homolog 2) [Source:UniProtKB/Swiss-Prot;Acc:Q9ER62]
53418		ENSMUSG00000028541	53418	B4galt2	Beta-1,4-galactosyltransferase 2 (Beta-1,4-GalTase 2)(Beta4Gal-T2)(b4Gal-T2)(EC 2.4.1.-)(UDP-galactose:beta-N-acetylglucosamine beta-1,4-galactosyltransferase 2)(UDP-Gal:beta-GlcNAc beta-1,4-galactosyltransferase 2) [Includes Lactose synthase A protein(EC 2.4.1.22);N-acetyllactosamine synthase(EC 2.4.1.90)(Nal synthetase);Beta-N-acetylglucosaminylglycopeptide beta-1,4-galactosyltransferase(EC 2.4…
64435		ENSMUSG00000026415	64435	Fcamr	High affinity immunoglobulin alpha and immunoglobulin mu Fc receptor Precursor (Fc alpha/mu receptor)(mFcamR) [Source:UniProtKB/Swiss-Prot;Acc:Q2TB54]
13047		ENSMUSG00000029705	13047	Cux1	Homeobox protein cut-like 1 (CCAAT displacement protein)(CDP)(Homeobox protein Cux) [Source:UniProtKB/Swiss-Prot;Acc:P53564]
16956		ENSMUSG00000015568	16956 669888	Lpl	Lipoprotein lipase Precursor (LPL)(EC 3.1.1.34) [Source:UniProtKB/Swiss-Prot;Acc:P11152]
56620		ENSMUSG00000023349	56620	Clec4n	C-type lectin domain family 6 member A (Dendritic cell-associated lectin 2)(DC-associated C-type lectin 2)(Dectin-2)(C-type lectin superfamily member 10) [Source:UniProtKB/Swiss-Prot;Acc:Q9JKF4]
56149		ENSMUSG00000000531	56149	Grasp	General receptor for phosphoinositides 1-associated scaffold protein (GRP1-associated scaffold protein) [Source:UniProtKB/Swiss-Prot;Acc:Q9JJA9]
67158		ENSMUSG00000044982	67158	Sft2d3	Vesicle transport protein SFT2C (SFT2 domain-containing protein 3) [Source:UniProtKB/Swiss-Prot;Acc:Q9CSV6]
94224		ENSMUSG00000038541	94224	Srd5a2	3-oxo-5-alpha-steroid 4-dehydrogenase 2 (EC 1.3.99.5)(Steroid 5-alpha-reductase 2)(5 alpha-SR2)(SR type 2) [Source:UniProtKB/Swiss-Prot;Acc:Q99N99]
18821		ENSMUSG00000038583	18821	Pln	Cardiac phospholamban (PLB) [Source:UniProtKB/Swiss-Prot;Acc:P61014]
53618		ENSMUSG00000021065	53618	Fut8	Alpha-(1,6)-fucosyltransferase (alpha1-6FucT)(EC 2.4.1.68)(Glycoprotein 6-alpha-L-fucosyltransferase)(GDP-fucose--glycoprotein fucosyltransferase)(GDP-L-Fuc:N-acetyl-beta-D-glucosaminide alpha1,6-fucosyltransferase)(Fucosyltransferase 8) [Source:UniProtKB/Swiss-Prot;Acc:Q9WTS2]
19262		ENSMUSG00000027303	19262	Ptpra	Receptor-type tyrosine-protein phosphatase alpha Precursor (Protein-tyrosine phosphatase alpha)(R-PTP-alpha)(EC 3.1.3.48)(LCA-related phosphatase)(PTPTY-28) [Source:UniProtKB/Swiss-Prot;Acc:P18052]
76308		ENSMUSG00000024870	76308	Rab1b	Ras-related protein Rab-1B [Source:UniProtKB/Swiss-Prot;Acc:Q9D1G1]
71910		ENSMUSG00000031570	71910	Ppapdc1b	Phosphatidic acid phosphatase type 2 domain-containing protein 1B (EC 3.1.3.-) [Source:UniProtKB/Swiss-Prot;Acc:Q3UMZ3]
16367		ENSMUSG00000055980	16367	Irs1	Insulin receptor substrate 1 (IRS-1) [Source:UniProtKB/Swiss-Prot;Acc:P35569]
56453		ENSMUSG00000031835	56453	Mbtps1	Membrane-bound transcription factor site-1 protease Precursor (EC 3.4.21.112)(S1P endopeptidase)(Site-1 protease)(Subtilisin/kexin isozyme 1)(SKI-1)(Sterol-regulated luminal protease) [Source:UniProtKB/Swiss-Prot;Acc:Q9WTZ2]
20276		ENSMUSG00000030340	20276	Scnn1a	Amiloride-sensitive sodium channel subunit alpha (Epithelial Na(+) channel subunit alpha)(Alpha-ENaC)(SCNEA)(Nonvoltage-gated sodium channel 1 subunit alpha)(Alpha-NaCH) [Source:UniProtKB/Swiss-Prot;Acc:Q61180]
382620		ENSMUSG00000034111	382620	Tmed8	Protein TMED8 [Source:UniProtKB/Swiss-Prot;Acc:Q3UHI4]
16976		ENSMUSG00000029103	16976	Lrpap1	Alpha-2-macroglobulin receptor-associated protein Precursor (Alpha-2-MRAP)(Low density lipoprotein receptor-related protein-associated protein 1)(RAP)(Heparin-binding protein 44)(HBP-44) [Source:UniProtKB/Swiss-Prot;Acc:P55302]
15007		ENSMUSG00000067235	15007	H2-Q10	H-2 class I histocompatibility antigen, Q10 alpha chain Precursor [Source:UniProtKB/Swiss-Prot;Acc:P01898]
20671		ENSMUSG00000025902	20671	Sox17	Transcription factor SOX-17 [Source:UniProtKB/Swiss-Prot;Acc:Q61473]
22295		ENSMUSG00000012819	22295	Cdh23	Cadherin-23 Precursor (Otocadherin) [Source:UniProtKB/Swiss-Prot;Acc:Q99PF4]
68795		ENSMUSG00000044308	68795	Ubr3	E3 ubiquitin-protein ligase UBR3 (EC 6.3.2.-)(N-recognin-3)(Ubiquitin-protein ligase E3-alpha-3)(Ubiquitin-protein ligase E3-alpha-III)(Zinc finger protein 650) [Source:UniProtKB/Swiss-Prot;Acc:Q5U430]
17957		ENSMUSG00000027438	17957	Napb	Beta-soluble NSF attachment protein (SNAP-beta)(N-ethylmaleimide-sensitive factor attachment protein beta)(Brain protein I47) [Source:UniProtKB/Swiss-Prot;Acc:P28663]
14977		ENSMUSG00000024327	14977	Slc39a7	Zinc transporter SLC39A7 (Solute carrier family 39 member 7)(Histidine-rich membrane protein Ke4) [Source:UniProtKB/Swiss-Prot;Acc:Q31125]
14309		ENSMUSG00000032937	14309	Fshr	Follicle-stimulating hormone receptor Precursor (FSH-R)(Follitropin receptor) [Source:UniProtKB/Swiss-Prot;Acc:P35378]
19386		ENSMUSG00000003226	19386	Ranbp2	E3 SUMO-protein ligase RanBP2 (Ran-binding protein 2) [Source:UniProtKB/Swiss-Prot;Acc:Q9ERU9]
13642		ENSMUSG00000001300	13642	Efnb2	Ephrin-B2 Precursor (EPH-related receptor tyrosine kinase ligand 5)(LERK-5)(HTK ligand)(HTK-L)(ELF-2) [Source:UniProtKB/Swiss-Prot;Acc:P52800]
68666		ENSMUSG00000042078	68666	Svop	Synaptic vesicle 2-related protein (SV2-related protein) [Source:UniProtKB/Swiss-Prot;Acc:Q8BFT9]
54153		ENSMUSG00000004952	54153	Rasa4	Ras GTPase-activating protein 4 (Ras p21 protein activator 4)(RasGAP-activating-like protein 2)(Calcium-promoted Ras inactivator) [Source:UniProtKB/Swiss-Prot;Acc:Q6PFQ7]
74424		ENSMUSG00000030650	74424	Tmc5	Transmembrane channel-like protein 5 [Source:UniProtKB/Swiss-Prot;Acc:Q32NZ6]
68775		ENSMUSG00000020566	68775	Atp6v1c2	V-type proton ATPase subunit C 2 (V-ATPase subunit C 2)(Vacuolar proton pump subunit C 2) [Source:UniProtKB/Swiss-Prot;Acc:Q99L60]
93675		ENSMUSG00000030365	93675	Clec2i	C-type lectin domain family 2 member I (C-type lectin-related protein G)(Clr-g)(C-type lectin-related protein DCL1)(Osteoclast inhibitory lectin-related protein 2)(Ocil-related protein 2)(Lymphoid-derived C-type lectin-1)(LCL-1) [Source:UniProtKB/Swiss-Prot;Acc:Q9WVF9]
258883		ENSMUSG00000066750	258883	Olfr876	olfactory receptor 876 [Source:RefSeq peptide;Acc:NP_667094]
83767		ENSMUSG00000019831	83767	Wasf1	Wiskott-Aldrich syndrome protein family member 1 (WASP family protein member 1)(Protein WAVE-1) [Source:UniProtKB/Swiss-Prot;Acc:Q8R5H6]
76295		ENSMUSG00000037400	76295	Atp11b	ATPase, class VI, type 11B [Source:RefSeq peptide;Acc:NP_083846]
216190		ENSMUSG00000020263	216190	Appl2	DCC-interacting protein 13-beta (Dip13-beta)(Adapter protein containing PH domain, PTB domain and leucine zipper motif 2) [Source:UniProtKB/Swiss-Prot;Acc:Q8K3G9]
433256		ENSMUSG00000024981	433256	Acsl5	Long-chain-fatty-acid--CoA ligase 5 (EC 6.2.1.3)(Long-chain acyl-CoA synthetase 5)(LACS 5) [Source:UniProtKB/Swiss-Prot;Acc:Q8JZR0]
12843		ENSMUSG00000029661	12843	Col1a2	Collagen alpha-2(I) chain Precursor (Alpha-2 type I collagen) [Source:UniProtKB/Swiss-Prot;Acc:Q01149]
21938		ENSMUSG00000028599	21938	Tnfrsf1b	Tumor necrosis factor receptor superfamily member 1B Precursor (Tumor necrosis factor receptor 2)(TNF-R2)(Tumor necrosis factor receptor type II)(p75)(p80 TNF-alpha receptor)(CD120b antigen) [Source:UniProtKB/Swiss-Prot;Acc:P25119]
71893		ENSMUSG00000019320	71893	Noxo1	NADPH oxidase organizer 1 (Nox organizer 1)(Sorting nexin-28) [Source:UniProtKB/Swiss-Prot;Acc:Q8VCM2]
75826		ENSMUSG00000022855	75826	Senp2	Sentrin-specific protease 2 (EC 3.4.22.-)(Sentrin/SUMO-specific protease SENP2)(SUMO-1/Smt3-specific isopeptidase 2)(Smt3ip2)(Axam2)(SUMO-1 protease 1)(SuPr-1) [Source:UniProtKB/Swiss-Prot;Acc:Q91ZX6]
67416		ENSMUSG00000033436	67416	Armcx2	Armadillo repeat-containing X-linked protein 2 [Source:UniProtKB/Swiss-Prot;Acc:Q6A058]
70316		ENSMUSG00000030869	100043472 70316	Ndufab1	Acyl carrier protein, mitochondrial Precursor (ACP)(NADH-ubiquinone oxidoreductase 9.6 kDa subunit)(CI-SDAP) [Source:UniProtKB/Swiss-Prot;Acc:Q9CR21]
74102		ENSMUSG00000022664	74102	Slc35a5	Probable UDP-sugar transporter protein SLC35A5 (Solute carrier family 35 member A5) [Source:UniProtKB/Swiss-Prot;Acc:Q921R7]
18000		ENSMUSG00000026276	18000	Sept2	Septin-2 (Neural precursor cell expressed developmentally down-regulated protein 5)(NEDD-5) [Source:UniProtKB/Swiss-Prot;Acc:P42208]
74116		ENSMUSG00000024011	74116	Pi16	Peptidase inhibitor 16 Precursor (Cysteine-rich protease inhibitor) [Source:UniProtKB/Swiss-Prot;Acc:Q9ET66]
113851		ENSMUSG00000047203	113851	V1ra9	Vomeronasal type-1 receptor A9 (Vomeronasal receptor 7)(Pheromone receptor VN7) [Source:UniProtKB/Swiss-Prot;Acc:Q9EPB8]
72056		ENSMUSG00000035372	72056	1810055G02Rik	Uncharacterized protein C11orf24 homolog Precursor [Source:UniProtKB/Swiss-Prot;Acc:Q9D8N1]
12512		ENSMUSG00000025351	12512	Cd63	CD63 antigen (CD63 antigen) [Source:UniProtKB/Swiss-Prot;Acc:P41731]
71740		ENSMUSG00000006411	71740	Pvrl4	Poliovirus receptor-related protein 4 Precursor (Nectin-4)(Ig superfamily receptor LNIR) [Source:UniProtKB/Swiss-Prot;Acc:Q8R007]
20479		ENSMUSG00000009907	20479	Vps4b	Vacuolar protein sorting-associated protein 4B (Suppressor of K(+) transport growth defect 1)(Protein SKD1) [Source:UniProtKB/Swiss-Prot;Acc:P46467]
19342		ENSMUSG00000053291	19342	Rab4b	Ras-related protein Rab-4B [Source:UniProtKB/Swiss-Prot;Acc:Q91ZR1]
53601		ENSMUSG00000024440	53601	Pcdh12	Protocadherin-12 Precursor (Vascular cadherin-2)(Vascular endothelial cadherin-2)(VE-cadherin-2)(VE-cad-2) [Source:UniProtKB/Swiss-Prot;Acc:O55134]
20524		ENSMUSG00000022404	20524	Slc25a17	Peroxisomal membrane protein PMP34 (34 kDa peroxisomal membrane protein)(Solute carrier family 25 member 17) [Source:UniProtKB/Swiss-Prot;Acc:O70579]
13097		ENSMUSG00000032808	13097 639008	Cyp2c38	Cytochrome P450 2C38 (EC 1.14.14.1)(CYPIIC38) [Source:UniProtKB/Swiss-Prot;Acc:P56655]
14760		ENSMUSG00000032641	14760	Gpr19	Probable G-protein coupled receptor 19 [Source:UniProtKB/Swiss-Prot;Acc:Q61121]
13723		ENSMUSG00000021728	13723	Emb	Embigin Precursor (Teratocarcinoma glycoprotein Gp-70) [Source:UniProtKB/Swiss-Prot;Acc:P21995]
233066		ENSMUSG00000019737	233066	AI428936	KASH domain-containing protein C19orf46 homolog [Source:UniProtKB/Swiss-Prot;Acc:Q8CII8]
106878		ENSMUSG00000038059	106878	2010002N04Rik	Putative small membrane protein NID67 (NGF-induced differentiation clone 67 protein) [Source:UniProtKB/Swiss-Prot;Acc:Q99PE5]
83429		ENSMUSG00000005949	83429	Ctns	Cystinosin [Source:UniProtKB/Swiss-Prot;Acc:P57757]
14160		ENSMUSG00000020140	14160	Lgr5	Leucine-rich repeat-containing G-protein coupled receptor 5 Precursor (G-protein coupled receptor 49)(Orphan G-protein coupled receptor FEX) [Source:UniProtKB/Swiss-Prot;Acc:Q9Z1P4]
75599		ENSMUSG00000051375	75599	Pcdh1	protocadherin 1 [Source:RefSeq peptide;Acc:NP_083633]
74754		ENSMUSG00000034926	74754	Dhcr24	24-dehydrocholesterol reductase Precursor (EC 1.3.1.-)(3-beta-hydroxysterol delta-24-reductase) [Source:UniProtKB/Swiss-Prot;Acc:Q8VCH6]
66624		ENSMUSG00000035227	66624	Spcs2	Signal peptidase complex subunit 2 (EC 3.4.-.-)(Microsomal signal peptidase 25 kDa subunit)(SPase 25 kDa subunit) [Source:UniProtKB/Swiss-Prot;Acc:Q9CYN2]
12212		ENSMUSG00000031327	12212	Chic1	Cysteine-rich hydrophobic domain 1 protein (Brain X-linked protein) [Source:UniProtKB/Swiss-Prot;Acc:Q8CBW7]
15165		ENSMUSG00000021730	15165	Hcn1	Potassium/sodium hyperpolarization-activated cyclic nucleotide-gated channel 1 (Brain cyclic nucleotide-gated channel 1)(BCNG-1)(Hyperpolarization-activated cation channel 2)(HAC-2) [Source:UniProtKB/Swiss-Prot;Acc:O88704]
67800		ENSMUSG00000030747	67800	Dgat2	Diacylglycerol O-acyltransferase 2 (EC 2.3.1.20)(Diglyceride acyltransferase 2) [Source:UniProtKB/Swiss-Prot;Acc:Q9DCV3]
194357		ENSMUSG00000029885	194357	Moxd2	DBH-like monooxygenase protein 2 Precursor (EC 1.14.17.-)(Dopamine-beta-hydroxylase-like protein) [Source:UniProtKB/Swiss-Prot;Acc:Q7TT41]
11308		ENSMUSG00000058835	11308	Abi1	Abl interactor 1 (Abelson interactor 1)(Abi-1)(Spectrin SH3 domain-binding protein 1)(Eps8 SH3 domain-binding protein)(Eps8-binding protein)(e3B1)(Ablphilin-1) [Source:UniProtKB/Swiss-Prot;Acc:Q8CBW3]
14585		ENSMUSG00000025089	14585	Gfra1	GDNF family receptor alpha-1 Precursor (GFR-alpha-1)(GDNF receptor alpha)(GDNFR-alpha)(TGF-beta-related neurotrophic factor receptor 1) [Source:UniProtKB/Swiss-Prot;Acc:P97785]
60510		ENSMUSG00000062542	60510	Syt9	Synaptotagmin-9 (Synaptotagmin IX)(SytIX)(Synaptotagmin V) [Source:UniProtKB/Swiss-Prot;Acc:Q9R0N9]
494448		ENSMUSG00000022421	494448 73340 504193	Nptxr	Chromobox protein homolog 6 [Source:UniProtKB/Swiss-Prot;Acc:Q9DBY5]
11540		ENSMUSG00000020178	11540	Adora2a	Adenosine receptor A2a [Source:UniProtKB/Swiss-Prot;Acc:Q60613]
15118		ENSMUSG00000031910	15118 100047776	Has3	Hyaluronan synthase 3 (EC 2.4.1.212)(Hyaluronate synthase 3)(Hyaluronic acid synthase 3)(HA synthase 3) [Source:UniProtKB/Swiss-Prot;Acc:O08650]
11500		ENSMUSG00000022056	11500	Adam7	Disintegrin and metalloproteinase domain-containing protein 7 Precursor (ADAM 7) [Source:UniProtKB/Swiss-Prot;Acc:O35227]
54325		ENSMUSG00000006390	54325	Elovl1	Elongation of very long chain fatty acids protein 1 [Source:UniProtKB/Swiss-Prot;Acc:Q9JLJ5]
67453		ENSMUSG00000024259	67453	Slc25a46	Solute carrier family 25 member 46 [Source:UniProtKB/Swiss-Prot;Acc:Q9CQS4]
66043		ENSMUSG00000003072	66043	Atp5d	ATP synthase subunit delta, mitochondrial Precursor (F-ATPase delta subunit) [Source:UniProtKB/Swiss-Prot;Acc:Q9D3D9]
70310		ENSMUSG00000019461	100048758 70310	Plscr3	Phospholipid scramblase 3 (PL scramblase 3)(Ca(2+)-dependent phospholipid scramblase 3) [Source:UniProtKB/Swiss-Prot;Acc:Q9JIZ9]
16418		ENSMUSG00000027613	16418	Eif6	Eukaryotic translation initiation factor 6 (eIF-6)(B4 integrin interactor)(CAB)(p27(BBP)) [Source:UniProtKB/Swiss-Prot;Acc:O55135]
259102		ENSMUSG00000050281	259102	Olfr630	olfactory receptor 630 [Source:RefSeq peptide;Acc:NP_667309]
56224		ENSMUSG00000028152	56224	Tspan5	Tetraspanin-5 (Tspan-5)(Transmembrane 4 superfamily member 9)(Tetraspan NET-4) [Source:UniProtKB/Swiss-Prot;Acc:P62080]
55925		ENSMUSG00000031098	55925	Syt8	Synaptotagmin-8 (Synaptotagmin VIII)(SytVIII) [Source:UniProtKB/Swiss-Prot;Acc:Q9R0N6]
13057		ENSMUSG00000006519	13057	Cyba	Cytochrome b-245 light chain (p22 phagocyte B-cytochrome)(Neutrophil cytochrome b 22 kDa polypeptide)(p22-phox)(p22phox)(Cytochrome b(558) alpha chain)(Cytochrome b558 subunit alpha)(Superoxide-generating NADPH oxidase light chain subunit) [Source:UniProtKB/Swiss-Prot;Acc:Q61462]
14064		ENSMUSG00000021675	14064	F2rl2	Proteinase-activated receptor 3 Precursor (PAR-3)(Thrombin receptor-like 2)(Coagulation factor II receptor-like 2) [Source:UniProtKB/Swiss-Prot;Acc:O08675]
14227		ENSMUSG00000056629	14227	Fkbp2	FK506-binding protein 2 Precursor (EC 5.2.1.8)(Peptidyl-prolyl cis-trans isomerase)(PPIase)(Rotamase)(13 kDa FKBP)(FKBP-13) [Source:UniProtKB/Swiss-Prot;Acc:P45878]
14256		ENSMUSG00000074129	14256	Flt3l	SL cytokine Precursor (Fms-related tyrosine kinase 3 ligand)(Flt3 ligand)(Flt3L) [Source:UniProtKB/Swiss-Prot;Acc:P49772]
13176		ENSMUSG00000060534	13176	Dcc	Netrin receptor DCC Precursor (Tumor suppressor protein DCC) [Source:UniProtKB/Swiss-Prot;Acc:P70211]
14972		ENSMUSG00000061232	14972	H2-K1	H-2 class I histocompatibility antigen, K-B alpha chain Precursor (H-2K(B)) [Source:UniProtKB/Swiss-Prot;Acc:P01901]
20347		ENSMUSG00000057969	20347	Sema3b	Semaphorin-3B Precursor (Semaphorin-A)(Sema A) [Source:UniProtKB/Swiss-Prot;Acc:Q62177]
21944		ENSMUSG00000018752	69583 21944 619441	Tnfsf12	Tumor necrosis factor ligand superfamily member 12 (TNF-related weak inducer of apoptosis)(TWEAK) [Contains Tumor necrosis factor ligand superfamily member 12, membrane form;Tumor necrosis factor ligand superfamily member 12, secreted form] [Source:UniProtKB/Swiss-Prot;Acc:O54907]
83379		ENSMUSG00000029195	83379	Klb	Beta-klotho (BetaKlotho)(Klotho beta-like protein) [Source:UniProtKB/Swiss-Prot;Acc:Q99N32]
103743		ENSMUSG00000035413	103743	Tmem98	Transmembrane protein 98 [Source:UniProtKB/Swiss-Prot;Acc:Q91X86]
68634		ENSMUSG00000078681	68634	Tm2d3	TM2 domain-containing protein 3 Precursor [Source:UniProtKB/Swiss-Prot;Acc:Q8BJ83]
16795		ENSMUSG00000004383	16795	Large	Glycosyltransferase-like protein LARGE1 (EC 2.4.-.-)(Acetylglucosaminyltransferase-like 1A) [Source:UniProtKB/Swiss-Prot;Acc:Q9Z1M7]
12262		ENSMUSG00000036896	12262	C1qc	Complement C1q subcomponent subunit C Precursor [Source:UniProtKB/Swiss-Prot;Acc:Q02105]
12868		ENSMUSG00000035885	100048483 12868	Cox8a	Cytochrome c oxidase subunit 8A, mitochondrial Precursor (Cytochrome c oxidase polypeptide VIII-liver)(Cytochrome c oxidase subunit 8-2) [Source:UniProtKB/Swiss-Prot;Acc:Q64445]
54646		ENSMUSG00000039556	54646	Ppp1r3f	Protein phosphatase 1 regulatory subunit 3F [Source:UniProtKB/Swiss-Prot;Acc:Q9JIG4]
93730		ENSMUSG00000025245	93730 627624	Lztfl1	Leucine zipper transcription factor-like protein 1 [Source:UniProtKB/Swiss-Prot;Acc:Q9JHQ5]
13244		ENSMUSG00000038633	13244	Degs1	Sphingolipid delta(4)-desaturase DES1 (EC 1.14.-.-)(Degenerative spermatocyte homolog 1) [Source:UniProtKB/Swiss-Prot;Acc:O09005]
22113		ENSMUSG00000010760	22113	Phlda2	Pleckstrin homology-like domain family A member 2 (Imprinted in placenta and liver protein)(50C15 protein) [Source:UniProtKB/Swiss-Prot;Acc:O08969]
12390		ENSMUSG00000000058	12390	Cav2	Caveolin-2 [Source:UniProtKB/Swiss-Prot;Acc:Q9WVC3]
13200		ENSMUSG00000028757	13200	Ddost	Dolichyl-diphosphooligosaccharide--protein glycosyltransferase 48 kDa subunit Precursor (Oligosaccharyl transferase 48 kDa subunit)(DDOST 48 kDa subunit)(EC 2.4.1.119) [Source:UniProtKB/Swiss-Prot;Acc:O54734]
19270		ENSMUSG00000021745	19270	Ptprg	Receptor-type tyrosine-protein phosphatase gamma Precursor (Protein-tyrosine phosphatase gamma)(R-PTP-gamma)(EC 3.1.3.48) [Source:UniProtKB/Swiss-Prot;Acc:Q05909]
14026		ENSMUSG00000021262	100047333 14026	Evl	Ena/VASP-like protein (Ena/vasodilator-stimulated phosphoprotein-like) [Source:UniProtKB/Swiss-Prot;Acc:P70429]
83961		ENSMUSG00000032311	83961	Nrg4	Pro-neuregulin-4, membrane-bound isoform (Pro-NRG4) [Contains Neuregulin-4(NRG-4)] [Source:UniProtKB/Swiss-Prot;Acc:Q9WTX4]
23925		ENSMUSG00000029866	23925	Kel	Kell blood group glycoprotein homolog (EC 3.4.24.-)(CD238 antigen) [Source:UniProtKB/Swiss-Prot;Acc:Q9EQF2]
20616		ENSMUSG00000033419	20616	Snap91	Clathrin coat assembly protein AP180 (Clathrin coat-associated protein AP180)(91 kDa synaptosomal-associated protein)(Phosphoprotein F1-20) [Source:UniProtKB/Swiss-Prot;Acc:Q61548]
54208		ENSMUSG00000030654	54208	Arl6ip1	ADP-ribosylation factor-like protein 6-interacting protein 1 (ARL-6-interacting protein 1)(Aip-1)(Protein TBX2) [Source:UniProtKB/Swiss-Prot;Acc:Q9JKW0]
67020		ENSMUSG00000045377	67020	Tmem88	Transmembrane protein 88 [Source:UniProtKB/Swiss-Prot;Acc:Q9D0N8]
20504		ENSMUSG00000021335	20504	Slc17a1	Sodium-dependent phosphate transport protein 1 (Sodium/phosphate cotransporter 1)(Na(+)/PI cotransporter 1)(Solute carrier family 17 member 1)(Renal sodium-dependent phosphate transport protein 1)(Renal sodium-phosphate transport protein 1)(Renal Na(+)-dependent phosphate cotransporter 1) [Source:UniProtKB/Swiss-Prot;Acc:Q61983]
20392		ENSMUSG00000004631	20392	Sgce	Epsilon-sarcoglycan Precursor (Epsilon-SG) [Source:UniProtKB/Swiss-Prot;Acc:O70258]
17390		ENSMUSG00000031740	17390	Mmp2	72 kDa type IV collagenase Precursor (EC 3.4.24.24)(72 kDa gelatinase)(Matrix metalloproteinase-2)(MMP-2)(Gelatinase A) [Source:UniProtKB/Swiss-Prot;Acc:P33434]
27404		ENSMUSG00000020620	27404	Abca8b	ATP-binding cassette sub-family A member 8-B [Source:UniProtKB/Swiss-Prot;Acc:Q8K440]
12359		ENSMUSG00000027187	12359	Cat	Catalase (EC 1.11.1.6) [Source:UniProtKB/Swiss-Prot;Acc:P24270]
14763		ENSMUSG00000039904	14763	Gpr37	Probable G-protein coupled receptor 37 Precursor [Source:UniProtKB/Swiss-Prot;Acc:Q9QY42]
66890		ENSMUSG00000021484	66890	Lman2	Vesicular integral-membrane protein VIP36 Precursor (Lectin mannose-binding 2) [Source:UniProtKB/Swiss-Prot;Acc:Q9DBH5]
57743		ENSMUSG00000025816	57743	Sec61a2	Protein transport protein Sec61 subunit alpha isoform 2 (Sec61 alpha-2) [Source:UniProtKB/Swiss-Prot;Acc:Q9JLR1]
20292		ENSMUSG00000020676	20292	Ccl11	Eotaxin Precursor (C-C motif chemokine 11)(Small-inducible cytokine A11)(Eosinophil chemotactic protein) [Source:UniProtKB/Swiss-Prot;Acc:P48298]
69314		ENSMUSG00000028533	69314	1700011H22Rik	Uncharacterized protein C9orf134 homolog Precursor [Source:UniProtKB/Swiss-Prot;Acc:A6PWV3]
57254		ENSMUSG00000045267	57254	Tas2r119	Taste receptor type 2 member 119 (T2R119)(Taste receptor type 2 member 19)(T2R19) [Source:UniProtKB/Swiss-Prot;Acc:Q9JKT2]
11933		ENSMUSG00000032412	11933	Atp1b3	Sodium/potassium-transporting ATPase subunit beta-3 (Sodium/potassium-dependent ATPase subunit beta-3)(ATPB-3)(CD298 antigen) [Source:UniProtKB/Swiss-Prot;Acc:P97370]
100044854		ENSMUSG00000027536	66371 100044854	Chmp4c	Charged multivesicular body protein 4c (Chromatin-modifying protein 4c)(CHMP4c) [Source:UniProtKB/Swiss-Prot;Acc:Q9D7F7]
320940		ENSMUSG00000062949	320940	Atp11c	Probable phospholipid-transporting ATPase 11C (EC 3.6.3.1)(ATPase class VI type 11C) [Source:UniProtKB/Swiss-Prot;Acc:Q9QZW0]
66139		ENSMUSG00000009214	66139	1110002H13Rik	Transmembrane protein ENSP00000339174 homolog [Source:UniProtKB/Swiss-Prot;Acc:Q9D1N4]
109552		ENSMUSG00000003161	109552	Sri	Sorcin [Source:UniProtKB/Swiss-Prot;Acc:Q6P069]
68904		ENSMUSG00000040396	68904	Abhd13	Abhydrolase domain-containing protein 13 (EC 3.-.-.-) [Source:UniProtKB/Swiss-Prot;Acc:Q80UX8]
12057		ENSMUSG00000058831	12057	Opn1sw	Blue-sensitive opsin (BOP)(Blue cone photoreceptor pigment)(Short wavelength-sensitive cone opsin)(S opsin) [Source:UniProtKB/Swiss-Prot;Acc:P51491]
65970		ENSMUSG00000023022	65970	Lima1	LIM domain and actin-binding protein 1 (Epithelial protein lost in neoplasm)(mEPLIN) [Source:UniProtKB/Swiss-Prot;Acc:Q9ERG0]
113865		ENSMUSG00000060687	113865 171195	V1rc22	vomeronasal 1 receptor, C8 [Source:RefSeq peptide;Acc:NP_444468]
13611		ENSMUSG00000044199	13611	S1pr4	Sphingosine 1-phosphate receptor 4 (S1P4)(Sphingosine 1-phosphate receptor Edg-6)(S1P receptor Edg-6)(Endothelial differentiation G-protein coupled receptor 6)(Lysophospholipid receptor C1) [Source:UniProtKB/Swiss-Prot;Acc:Q9Z0L1]
22793		ENSMUSG00000029860	22793	Zyx	Zyxin [Source:UniProtKB/Swiss-Prot;Acc:Q62523]
69774		ENSMUSG00000024677	69774	Ms4a6b	Membrane-spanning 4-domains subfamily A member 6B [Source:UniProtKB/Swiss-Prot;Acc:Q99N09]
67909		ENSMUSG00000028938	67909	Galntl5	Putative polypeptide N-acetylgalactosaminyltransferase-like protein 5 (EC 2.4.1.-)(Polypeptide GalNAc transferase 15)(pp-GaNTase 15)(GalNAc-T15)(Protein-UDP acetylgalactosaminyltransferase 15)(UDP-GalNAc:polypeptide N-acetylgalactosaminyltransferase 15) [Source:UniProtKB/Swiss-Prot;Acc:Q9D4M9]
22021		ENSMUSG00000034118	22021	Tpst1	Protein-tyrosine sulfotransferase 1 (EC 2.8.2.20)(Tyrosylprotein sulfotransferase-1)(TPST-1) [Source:UniProtKB/Swiss-Prot;Acc:O70281]
67458		ENSMUSG00000001576	67458	Ergic1	Endoplasmic reticulum-Golgi intermediate compartment protein 1 (ER-Golgi intermediate compartment 32 kDa protein)(ERGIC-32) [Source:UniProtKB/Swiss-Prot;Acc:Q9DC16]
77803		ENSMUSG00000042655	77803	Fam159b	UPF0514 membrane protein FAM159B [Source:UniProtKB/Swiss-Prot;Acc:Q9D1Y9]
66039		ENSMUSG00000072680	66039 100039257 100039192	D14Ertd449e	Transmembrane protein C10orf57 homolog [Source:UniProtKB/Swiss-Prot;Acc:Q9DCV5]
83965		ENSMUSG00000023960	83965	Enpp5	Ectonucleotide pyrophosphatase/phosphodiesterase family member 5 Precursor (E-NPP5)(NPP-5)(EC 3.1.-.-) [Source:UniProtKB/Swiss-Prot;Acc:Q9EQG7]
16497		ENSMUSG00000027827	16497	Kcnab1	Voltage-gated potassium channel subunit beta-1 (K(+) channel subunit beta-1)(Kv-beta-1) [Source:UniProtKB/Swiss-Prot;Acc:P63143]
17476		ENSMUSG00000046805	17476	Mpeg1	Macrophage-expressed gene 1 protein Precursor (Macrophage gene 1 protein)(Mpg-1)(Protein MPS1) [Source:UniProtKB/Swiss-Prot;Acc:A1L314]
27260		ENSMUSG00000021118	27260	Plek2	Pleckstrin-2 [Source:UniProtKB/Swiss-Prot;Acc:Q9WV52]
258276		ENSMUSG00000059867	258276	Olfr960	olfactory receptor 960 [Source:RefSeq peptide;Acc:NP_666391]
109637		ENSMUSG00000006313	109637	Upk1a	Uroplakin-1a (UP1a)(Uroplakin Ia)(UPIa)(UPKa) [Source:UniProtKB/Swiss-Prot;Acc:Q9D132]
57265		ENSMUSG00000050288	57265	Fzd2	Frizzled-2 Precursor (Fz-2)(mFz2)(mFz10) [Source:UniProtKB/Swiss-Prot;Acc:Q9JIP6]
64103		ENSMUSG00000031250	64103	Tnmd	Tenomodulin (TeM)(mTeM)(Chondromodulin-I-like protein)(ChM1L)(mChM1L)(Myodulin)(Tendin) [Source:UniProtKB/Swiss-Prot;Acc:Q9EP64]
97484		ENSMUSG00000031916	97484	Cog8	Conserved oligomeric Golgi complex subunit 8 (COG complex subunit 8)(Component of oligomeric Golgi complex 8) [Source:UniProtKB/Swiss-Prot;Acc:Q9JJA2]
11853		ENSMUSG00000002233	11853	Rhoc	Rho-related GTP-binding protein RhoC Precursor (Silica-induced gene 61 protein)(SIG-61) [Source:UniProtKB/Swiss-Prot;Acc:Q62159]
16651		ENSMUSG00000030255	16651	Sspn	Sarcospan (K-ras oncogene-associated protein)(Kirsten-Ras-associated protein) [Source:UniProtKB/Swiss-Prot;Acc:Q62147]
71146		ENSMUSG00000042532	71146	Golga7b	Golgin subfamily A member 7B [Source:UniProtKB/Swiss-Prot;Acc:Q9D428]
16493		ENSMUSG00000045534	16493	Kcna5	Potassium voltage-gated channel subfamily A member 5 (Voltage-gated potassium channel subunit Kv1.5)(KV1-5) [Source:UniProtKB/Swiss-Prot;Acc:Q61762]
74488		ENSMUSG00000052316	74488	Lrrc15	Leucine-rich repeat-containing protein 15 Precursor [Source:UniProtKB/Swiss-Prot;Acc:Q80X72]
22305		ENSMUSG00000066828	100042724 22305 100042673	Vmn2r37	vomeronasal 2, receptor, 14 [Source:RefSeq peptide;Acc:NP_033515]
74442		ENSMUSG00000050931	74442	Sgms2	Phosphatidylcholine:ceramide cholinephosphotransferase 2 (EC 2.7.8.27)(Sphingomyelin synthase 2) [Source:UniProtKB/Swiss-Prot;Acc:Q9D4B1]
258269		ENSMUSG00000063221	258269	Olfr930	olfactory receptor 930 [Source:RefSeq peptide;Acc:NP_666384]
20500		ENSMUSG00000001095	20500	Slc13a2	Solute carrier family 13 member 2 (Renal sodium/dicarboxylate cotransporter)(Na(+)/dicarboxylate cotransporter 1)(NaDC-1) [Source:UniProtKB/Swiss-Prot;Acc:Q9ES88]
67758		ENSMUSG00000027761	67758	Aadac	Arylacetamide deacetylase (AADAC)(EC 3.1.1.-) [Source:UniProtKB/Swiss-Prot;Acc:Q99PG0]
22403		ENSMUSG00000027656	22403	Wisp2	WNT1-inducible-signaling pathway protein 2 Precursor (WISP-2)(Connective tissue growth factor-like protein)(CTGF-L) [Source:UniProtKB/Swiss-Prot;Acc:Q9Z0G4]
14806		ENSMUSG00000056073	14806	Grik2	Glutamate receptor, ionotropic kainate 2 Precursor (Glutamate receptor 6)(GluR-6)(GluR6)(Glutamate receptor beta-2)(GluR beta-2) [Source:UniProtKB/Swiss-Prot;Acc:P39087]
72145		ENSMUSG00000043940	72145	Wdfy3	WD repeat and FYVE domain-containing protein 3 (Beach domain, WD repeat and FYVE domain-containing protein 1)(BWF1) [Source:UniProtKB/Swiss-Prot;Acc:Q6VNB8]
12770		ENSMUSG00000064039	12770	Ccr1l1	C-C chemokine receptor 1-like protein 1 (Macrophage inflammatory protein 1 alpha receptor-like 1) [Source:UniProtKB/Swiss-Prot;Acc:P51676]
67092		ENSMUSG00000027199	67092	Gatm	Glycine amidinotransferase, mitochondrial Precursor (EC 2.1.4.1)(L-arginine:glycine amidinotransferase)(Transamidinase)(AT) [Source:UniProtKB/Swiss-Prot;Acc:Q9D964]
75965		ENSMUSG00000021969	75965	Zdhhc20	Probable palmitoyltransferase ZDHHC20 (EC 2.3.1.-)(Zinc finger DHHC domain-containing protein 20)(DHHC-20) [Source:UniProtKB/Swiss-Prot;Acc:Q5Y5T1]
67775		ENSMUSG00000033355	67775	Rtp4	Receptor-transporting protein 4 (28 kDa interferon-responsive protein) [Source:UniProtKB/Swiss-Prot;Acc:Q9ER80]
68262		ENSMUSG00000023827	68262	Agpat4	1-acyl-sn-glycerol-3-phosphate acyltransferase delta (EC 2.3.1.51)(1-acylglycerol-3-phosphate O-acyltransferase 4)(1-AGP acyltransferase 4)(1-AGPAT 4)(Lysophosphatidic acid acyltransferase delta)(LPAAT-delta) [Source:UniProtKB/Swiss-Prot;Acc:Q8K4X7]
14618		ENSMUSG00000047797	14618	Gjb1	Gap junction beta-1 protein (Connexin-32)(Cx32) [Source:UniProtKB/Swiss-Prot;Acc:P28230]
78754		ENSMUSG00000021903	78754	Galntl2	Polypeptide N-acetylgalactosaminyltransferase-like protein 2 (EC 2.4.1.41)(Polypeptide GalNAc transferase-like protein 2)(pp-GaNTase-like protein 2)(GalNAc-T-like protein 2)(Protein-UDP acetylgalactosaminyltransferase-like protein 2)(UDP-GalNAc:polypeptide N-acetylgalactosaminyltransferase-like protein 2) [Source:UniProtKB/Swiss-Prot;Acc:Q9D2N8]
67472		ENSMUSG00000027601	67472	Mtfr1	Mitochondrial fission regulator 1 [Source:UniProtKB/Swiss-Prot;Acc:Q99MB2]
20607		ENSMUSG00000044933	20607	Sstr3	Somatostatin receptor type 3 (SS3R)(SSR-28) [Source:UniProtKB/Swiss-Prot;Acc:P30935]
54357		ENSMUSG00000028434	54357	Epb4.1l4b	Band 4.1-like protein 4B (Protein EHM2) [Source:UniProtKB/Swiss-Prot;Acc:Q9JMC8]
239556		ENSMUSG00000022416	239556	Cacna1i	calcium channel, voltage-dependent, alpha 1I subunit [Source:RefSeq peptide;Acc:NP_001037773]
68724		ENSMUSG00000026426	68724	Arl8a	ADP-ribosylation factor-like protein 8A (ADP-ribosylation factor-like protein 10B)(Novel small G protein indispensable for equal chromosome segregation 2) [Source:UniProtKB/Swiss-Prot;Acc:Q8VEH3]
16500		ENSMUSG00000050556	16500	Kcnb1	Potassium voltage-gated channel subfamily B member 1 (Voltage-gated potassium channel subunit Kv2.1)(mShab) [Source:UniProtKB/Swiss-Prot;Acc:Q03717]
19285		ENSMUSG00000004044	19285	Ptrf	Polymerase I and transcript release factor [Source:UniProtKB/Swiss-Prot;Acc:O54724]
94219		ENSMUSG00000064105	94219	Cnnm2	Metal transporter CNNM2 (Cyclin-M2)(Ancient conserved domain-containing protein 2)(mACDP2) [Source:UniProtKB/Swiss-Prot;Acc:Q3TWN3]
20495		ENSMUSG00000027202	20495	Slc12a1	Solute carrier family 12 member 1 (Bumetanide-sensitive sodium-(potassium)-chloride cotransporter 2)(BSC1)(Kidney-specific Na-K-Cl symporter) [Source:UniProtKB/Swiss-Prot;Acc:P55014]
23908		ENSMUSG00000040151	23908	Hs2st1	Heparan sulfate 2-O-sulfotransferase 1 (2-O-sulfotransferase)(2OST)(2-OST)(EC 2.8.2.-) [Source:UniProtKB/Swiss-Prot;Acc:Q8R3H7]
100047238		ENSMUSG00000027971	100047238 64580	Ndst4	Bifunctional heparan sulfate N-deacetylase/N-sulfotransferase 4 (EC 2.8.2.8)(Glucosaminyl N-deacetylase/N-sulfotransferase 4)(NDST-4)(N-heparan sulfate sulfotransferase 4)(N-HSST 4) [Includes Heparan sulfate N-deacetylase 4(EC 3.-.-.-);Heparan sulfate N-sulfotransferase 4(EC 2.8.2.-)] [Source:UniProtKB/Swiss-Prot;Acc:Q9EQW8]
70163		ENSMUSG00000013643	70163	2210415F13Rik	Uncharacterized protein UNQ511/PRO1026 homolog Precursor [Source:UniProtKB/Swiss-Prot;Acc:Q9D7S0]
60533		ENSMUSG00000016496	60533	Cd274	Programmed cell death 1 ligand 1 Precursor (Programmed death ligand 1)(PD-L1)(PDCD1 ligand 1)(B7 homolog 1)(B7-H1)(CD274 antigen) [Source:UniProtKB/Swiss-Prot;Acc:Q9EP73]
19775		ENSMUSG00000026469	19775	Xpr1	Xenotropic and polytropic retrovirus receptor 1 (Protein SYG1 homolog)(Rmc-1) [Source:UniProtKB/Swiss-Prot;Acc:Q9Z0U0]
[truncated: 1,603 more rows]
